# Supplementary material for: Subcellular sequencing of single neurons reveals the dendritic transcriptome of GABAergic interneurons
Source: eLife. 2021 Jan 6;10:e63092. doi: 10.7554/eLife.63092 (PMC7819707; doi:10.7554/eLife.63092)
Supplement: Supplementary file 3. — Related to Figure 2. Contains average normalized unique molecular identifier (UMI) counts of genes detected in the dendrites (Tab 1) and somata (Tab 2) of GABAergic and glutamatergic neurons. [file elife-63092-supp3.xlsx]

## Sheet: Dendrites
Gene_Name	GABAergic_1	GABAergic_2	GABAergic_3	Glutamatergic
Cox6a1	230.833	143.867	176.333	200.364
LOC252890-Cox7c	226.083	173.733	67.7222	139.909
Calm1	203.889	211.167	155	227.909
Map1a	167.222	125.5	138.944	108.273
Rnf139-Ndufb9	142.25	83.4333	94.2778	26.8182
Ndufa4	133.972	126.667	129.556	112
Cox6c	125.083	81.1667	75.9444	89.7273
Atp5me	117.528	95.6333	130.222	50.1818
Uqcrq	116.611	116.633	79.1111	42.7273
Pebp1	106.722	64.5333	50.4444	56.2727
Atp5mg	104.583	92.6	69.3333	83.4545
Timm8b	102.222	64.5	86.6111	16.4545
Cox8a	102.194	56.5	75.6667	93.5455
Rpl41	100.861	78.4333	84.5	30.7273
Atp5f1b	99.5833	95.7333	85.2222	50.0909
Fth1	92.25	100.3	78.0556	94.7273
Atp5f1e	88.9444	90.3667	95.7778	30.1818
Uqcr10	87.7222	64.6667	48.2778	55.1818
Cox5b	87.3611	73.7	77.6111	14
Map2	86.5556	70.9667	69.5556	134.364
Tmsb4x	82.8333	51.6	71.6667	75.6364
Atp5mc1	81.0833	61.8	68.6667	28.2727
Atp5mf-Zfp394	76.5556	26.3667	43.5	10.0909
Ndufa5	75.2222	38.8333	41.1667	6.27273
Uqcrh	73.6944	70.5	60.6111	48.8182
Uba52	73.4167	52.1667	80.3889	32.2727
Malat1	73.3889	90	74.9444	124
Lgi2	73.0556	14.8667	26.5	6.09091
Ndufb8	71.4444	47.7667	88.2222	43.9091
Ndufa2	66.8889	26.5667	48.3889	19.9091
Kif5c	64.8889	61.1333	139.222	42.8182
Atp5po	63.8889	74.9667	31.2778	17.3636
Ttc3	62.7778	35.9	20.5556	47.0909
Atp5mc3	59.5278	37.0333	78.0556	37.8182
Rpl37a-ps1	57.1111	63.1333	61.2778	16.3636
Atp5f1d	56.7778	37.3333	118.889	14.6364
Ndrg4	56.5	38.2333	27.3333	39.9091
Rpl35	56.0278	23.4333	42.8333	68.3636
Adck2-Ndufb2	54.8611	28.0667	37.6111	12.1818
LOC100912227	54.7222	34.5667	14.7222	42.2727
Serf2	54.3056	24.4667	11.1667	21.0909
Cisd1	54.1944	31.1667	57.1111	17.7273
Atp5pd	54.0278	46.0333	20.3889	8.90909
Fabp5	53.3611	12.0333	57.5556	17.5455
Cops9	52.2778	43.4333	28.3889	45.4545
Prdx2	51.7222	17.9	43.2778	26
Ckb	51.6944	27.8	10.8333	77.8182
Ndufc1	50.4722	26.6667	28.5556	49
Slc25a4	50.1389	45.6667	49.7778	88.5455
Babam2	49.8333	16.9333	20.9444	10.5455
Guk1	49.25	17.1667	31.5556	8.27273
Ccni	48.6111	10.6	18	21.4545
Ndufa6	48.4722	13.1667	10.2778	17.2727
Ywhab	47.8333	57.5	44.6667	68.1818
Lhx6-Ndufa8	47.6667	38.8667	44.1667	7.72727
Map1b	47.5556	78.2	94	53.2727
Ndufb11	47.4722	23.9667	14.7778	6.36364
Sptbn1	47.3056	31.3	28.3889	22.7273
Hsp90ab1	47.25	78.5	33.5	42.5455
Gnas-Gnas	46.8333	116.867	86.1111	82
Lsamp	46.7778	39.1667	26.4444	74.9091
Ndufb7	46.7778	28.7667	16.8333	103.273
Sod1	46.3333	20.4	55.1667	33.6364
Eef2	44.75	18.0667	23.0556	110.727
Atp2b2	44.1667	5.3	4.88889	6.45455
Minos1	44.1389	15.5667	27.8889	9.72727
Rps16	44.0833	17.1	24.1667	15.3636
Hcfc1r1	44.0278	24.8333	38.8889	6.45455
Uqcr11	43.8333	76.6667	38.1111	19.2727
Calm3	42.7778	34.9	146.611	13.1818
Atp5pf	42.7222	30.2667	67	28.0909
Bex2	42.5833	35.9333	26.9444	81.5455
Akr1a1	42.4444	34.4667	42.6111	47.4545
Sult4a1	42.1667	9.56667	56.8889	15.0909
Apc	41.1944	28.7667	18.2222	22.5455
Dynlrb1	41.0556	70.1	68.0556	49.2727
Cox4i1	40.5833	31.1667	17.8333	18.6364
Myl6	40.5278	84.4	24.2222	29.1818
Mt1-Mt3-Mt2A	39.6667	18.4333	13.5	44.1818
Mdh1	38.3889	18.5333	36.6667	18.0909
Ndufb5	38.3333	31.6667	29.0556	5.63636
Aco2	38.1667	31.0667	8.77778	13.4545
Rpl18a	37.8611	50.7667	50.6111	44.6364
LOC103692691	37.0278	26.9	25.3333	10.4545
Cartpt	36.8333	17.7333	6.5	2.54545
Usmg5	36.6944	21.7333	26.1667	25.5455
Oxct1	36.6111	59.3667	9.88889	14.5455
Rplp0	36.5556	30.2	73.8889	13.1818
Bcat1	36.0556	56.8	22.0556	29.5455
Rps11	34.9167	30.2	35	34.0909
Cox17	34.9167	19.9333	25.8333	12.5455
Basp1	34.7778	27.3333	36.5	32.2727
Actb	34.6111	18.1	35.4444	79.7273
Rab6b	34.5833	39.2667	84.5556	57.3636
Tcf25	34.5556	25.0333	60	11.9091
Oaz1	34.1944	19.9667	23.5	33.4545
Pabpc1	34.1389	7.5	9.66667	3.27273
Atp1b1	33.8889	42.7667	70	35.4545
Cplx1	32.8611	34.2333	29.2222	34.2727
Naa38	32.25	13.4667	18.4444	8.63636
Stmn3	32.2222	42.5	34.1667	40.6364
Tpt1	31.8889	45.5667	31.4444	23.0909
LOC108352650	31.8889	22.6	39.2778	17.0909
Ndufa3	31.8889	16.8333	38.8889	13.1818
Ndufab1	31.6944	20.8667	35.6667	7.18182
Gpx4	30.9722	26.1667	25.3333	24.3636
Cort	30.9444	9.43333	2.22222	2.63636
Stmn2	30.5278	80.9	79.0556	60.7273
AABR07015346.1	30.5	29.7667	23	22.9091
Tmem160	30.4167	3.7	19.9444	7.72727
Kif1a	30.3889	53.2333	43.6111	19
LOC102552369	30.3611	20.7667	26.1111	3.54545
Ndufa11	30.2222	14.1	21.7778	9.27273
Nedd8	29.5833	41.3333	24	85.1818
Rtn3	29.5556	34.8667	31.9444	31.3636
Gad2	29.5	44.3333	71.7222	6.45455
Nme2	29.4444	23.5667	43.6667	58.0909
Mpc2	29.3889	41.8667	12	11.8182
Atp6v0c-Amdhd2	29.0556	36.2667	43.1667	33
Ywhag	29.0556	35.1667	7.66667	14.0909
Psma7	29.0278	20.1333	65.1667	9.36364
Rims1	28.9444	9.46667	6.16667	8.90909
Polr2k	28.0833	14.9	9.83333	8.18182
Dpcd	27.9722	3.8	11.4444	3.36364
Zwint	27.4167	22.4	72.6667	39.2727
Meg3	27.0833	31.1	22.1667	36.6364
Uqcrb-224005	27.0833	18.7	12.7778	25.7273
Tmsb15b2	27.0556	24.8333	36.2778	3.90909
Ss18l2	26.9722	3.96667	13.3889	3.81818
Tcf4	26.8889	55.8667	36.1667	43.8182
Cox7a2l	26.8889	36.8	8.05556	24.2727
Rpl23	26.7778	39.6333	33	16.7273
Snx10	26.7222	5.3	8.27778	34.4545
Cdip1	26.6111	7.36667	4.88889	4.27273
Cystm1	26.5	18.0667	2.61111	2.90909
Tuba1a	26.2222	48.6667	24.5556	28.1818
Hsbp1	26.1944	22.3667	30.8333	6
Sec11c	26.1944	20.2	7.55556	11.5455
Atf4	25.9722	11.1667	13.4444	11.7273
Gtf2h5	25.8889	12.1333	4.5	22.8182
Rps27	25.7222	15.1	21.2778	59.6364
Gad1	25.4167	37.7	34.5556	7.72727
Ldhb	25.0833	45.4	34.8889	22.1818
Glrx2	25.0556	11.4333	5.88889	4.45455
Tmem130	25.0278	22.0667	12.4444	16.1818
Tp53inp2	24.8333	10.0667	6.05556	17.0909
Atox1	24.75	20.3333	9.77778	10
Hmgcs1	24.5556	8.23333	3.16667	4.09091
Rtn1	24.5	34.1667	51	35.6364
Hdhd2	24.4167	17	12.6667	3.63636
Ndufb6	24.3056	13.2333	37.5	24.2727
Slc25a3	24.2222	15.6333	20.7778	11.1818
Skp1	24.1944	20.6667	22.4444	29.5455
Bex3	24.0833	24.9667	22.6111	11.9091
AC095947.1	24.0833	8.16667	18.2222	16.5455
Tmsb10	24.0556	43.6333	71.3889	21.3636
Aldoa	24	20.4667	16.6111	37.3636
Mgst3	23.9722	10.4667	14.8889	7.27273
Rps3	23.9167	12.5667	39.8333	28.6364
Gnaq	23.8889	12.1667	12.4444	44
Sncb	23.8611	17.5	10.8333	11.5455
Dlgap1	23.5833	4.83333	3.33333	4.09091
Atxn7l3b	23.5	45.3333	75	6.54545
Pcp4	23.4444	21.9	39.8889	21.4545
Ttll7	23.3056	7.93333	5.94444	4.18182
LOC100910827	23.25	31.4	12.2222	9.90909
Alg8-Ndufc2	23.25	16.9667	14.2778	9.45455
Cdc42	23.2222	17.0333	27.8333	6.81818
Erlec1	23.1389	6.23333	6.55556	5.90909
Tuba1b	22.9722	41.6	31.8333	20.3636
Smdt1	22.9722	35.6	47.0556	6.27273
Clec2l	22.9722	9.5	10.7222	2.18182
Cd320-Ndufa7	22.9167	50.6333	47.2778	28
Rpl24	22.9167	19.8333	13.8889	8.18182
Rgs2	22.9167	9.76667	2.66667	7
Atp5f1c-094163	22.8333	39.2	18.2778	27.8182
Atp5f1a	22.7778	23	8.5	5.09091
Pfdn1	22.7222	14.0667	18.5	24.2727
Nefl	22.5556	40.2	46.1667	130.273
Gpr88	22.5278	3.56667	6.11111	3.63636
LOC100911769	22.3333	8.93333	15.3333	2.90909
Rundc3a	22.2778	8.6	14.3333	3.36364
Fkbp1a	22.0833	13.0667	25.6667	33.3636
Rufy3	21.9722	5.23333	15.5	47.2727
Akap12	21.9167	14.4667	13	37.0909
Atp6v0d1-Agrp	21.8611	42.9	28.8333	8.36364
Rbx1	21.8056	8.03333	14.2778	7.36364
Nrip3	21.8056	7.16667	46.6111	3.09091
Actr2	21.75	19.6333	21.1667	19.0909
Cox14	21.75	16.8	43.0556	14.0909
Ndufs8	21.75	8.63333	41.1111	28
LOC687780	21.6944	28.4667	33.7778	6.45455
Myo5a	21.5556	30	14.1667	22.3636
Ppp2r1a	21.4722	14.1	8.33333	21.6364
Txnl4a-RGD1560212	21.4167	15.5	16.8889	3.72727
Mrpl54	21.2778	27.1333	9.72222	2.90909
Timm13	21.1944	29.2667	27.3333	7.90909
Tomm7	21.1667	12.4667	26.5	20.9091
Reep5	21.1389	15.2333	8.77778	11.9091
Snap25	21.1111	31.4	20.0556	17.8182
Rps24	21.0833	18.1	19.8889	3.90909
Rpsa	20.9444	22.8667	25.5556	21.5455
Nefm	20.9167	56.0667	43.8889	51.3636
Cstb	20.9167	12.5	22	3.63636
Olfm1	20.8889	26.9	13.5556	26.3636
Ndufb10	20.8333	18.8333	27.1111	11.0909
Uchl1	20.75	28.9667	31.8333	30.1818
Calm2-073484	20.75	10.0333	13.6111	35.3636
Rnasek	20.6944	26.6333	30.6111	33.0909
Gm1673	20.6667	18.0333	16.5556	27.2727
Pcdh9	20.5833	10.3333	8.83333	5.45455
Sirt3	20.5833	1.76667	5.38889	1.63636
Syt1	20.3611	25.5	19.2778	6.81818
Ywhae	20.3611	14.4	16.3889	20.5455
Kif5b	20.3056	30.8	5.33333	3.63636
Ina	20.25	21.7333	10.8333	6
Sucla2	20.25	12.6333	14.2778	5.45455
Tmem183a	20.25	11.0333	13	2.90909
Sem1	20.1667	37.8667	7.27778	14.6364
Ptp4a2	20.1667	7.7	10	15.3636
Thy1	19.9722	5.4	10.1667	3.45455
Ola1	19.9444	6.56667	6.44444	3.36364
Ndufs2	19.9167	8.83333	28.2222	5.27273
Nme1	19.8611	13.2	5.77778	4.09091
Ank3	19.8056	5.36667	3.55556	16.7273
Trappc2l	19.5	11.4667	8.55556	2.72727
Map1lc3a	19.3889	9.3	9.27778	8.63636
Mrpl12	19.3889	4.8	9.5	19.4545
Gda	19.2778	36.9	6.27778	6.63636
Ddt-Gstt3	19.2778	16.8667	5.61111	15.2727
Pmm1	19.0556	24.7	6.05556	6.18182
Oip5	19	24.5	17	4.09091
GL.11587	19	21	11.3889	32.2727
Rps15	18.9444	9.93333	14.3889	6.54545
Mllt11	18.9167	36.6	9.55556	8.45455
Ghitm	18.9167	10.0333	7.22222	15.1818
AABR07072748.2	18.9167	6.9	22.8333	4.81818
Pcdh17	18.8889	10.0333	15.1111	17
Glrx5	18.8333	4.16667	12.4444	5.45455
Rpl19-AC135443.1	18.6667	27.8333	11.1667	4.54545
Aes	18.6667	9	4.16667	4.18182
Atp5mc2	18.6389	7.4	27.7222	5.45455
Cltc	18.5278	31.3333	36.8889	5.45455
Calm2-207032	18.4167	40.5	51.4444	30.1818
Gnao1	18.4167	8.26667	21.5	19
Trim24	18.3611	1.56667	1.38889	1.63636
Cplx2	18.3056	26.0333	68.5556	10.5455
Napb	18.2222	19.4	9.66667	27.1818
Ndufv2	18.1111	12.9333	35.3889	15
Selenom	18.0833	29.9667	5.72222	21.3636
Fabp3	18.0278	10.2333	17.6667	3.63636
Gng2	18	12.0333	18.7778	37.1818
Nap1l5	17.9167	21.9667	37.1111	5.36364
Sdhc	17.8333	6.83333	20.7778	3.63636
Dnm1l	17.7778	12.9	11.9444	23.4545
Bloc1s1	17.6944	9.83333	10.2222	31
Srp9	17.4444	5.9	6.05556	5.72727
Cnrip1	17.4444	2.53333	8.27778	2.54545
Pdhb	17.3333	5.73333	8	6.54545
Dpysl2	17.2778	9.56667	32.9444	5.81818
Ost4	17.25	7.73333	4.38889	5.54545
Rab3a	17.0833	19.3333	41.2778	13.3636
Atp6v1f	17.0556	17.3	45.3333	39.7273
Atp6v0e2	17.0278	23.3667	22.3333	7
Cox5a	17.0278	15.7667	41	8.54545
Ndufa9	17	3.43333	3	3.54545
Apbb1	16.9444	9.6	8.27778	6.18182
Rpl11	16.9167	11.3333	21.6111	11.4545
Mrpl48	16.9167	7.73333	5.83333	32.2727
Nit1	16.9167	5.16667	8.16667	13.2727
Zcchc17	16.8889	24.8333	18	6.09091
Nfe2l1	16.8889	10.3667	14.1667	15.2727
Xkr4	16.8611	4.26667	5.94444	4.09091
Igfbp3	16.75	5.1	3.72222	2.90909
Auh	16.75	3.83333	9.22222	3.18182
Klc1	16.7222	11.0667	27.1667	26
Atp2b1	16.7222	8.96667	9.66667	18.2727
Grm4-Mtch1	16.7222	6.66667	40.5556	7.18182
Crmp1	16.6944	5.9	9.38889	3.63636
Ctnnd2	16.6667	2.83333	16.3889	7.27273
Mrps24	16.6389	34.4333	5.88889	6.09091
Lage3-Ubl4a	16.5278	37.8667	10.1111	4.54545
Cyc1	16.5278	6.7	63.5	4.63636
Psmb1	16.4722	17.0333	2.77778	14.3636
Dnajc15	16.4722	14.3667	23.8333	5.63636
Pak3	16.4444	19.4333	14.7222	81.9091
Ank2.1	16.3611	21.1333	32.3333	9.27273
Gria1	16.3056	9.7	7.55556	5.90909
Sst	16.3056	7.06667	2.61111	2.81818
Elob	16.2778	13.5667	21.8333	9.09091
Nat8l	16.2778	4.63333	4.61111	2.45455
Evl	16.25	15.6333	11.3889	14.8182
Coa3	16.2222	2.43333	7.05556	2.54545
Mcts1	16.1667	15.7333	2.94444	2.63636
Sec62	16.1111	5.36667	14	7.45455
Bri3bp	16.1111	3.5	4.11111	3.54545
Tubb2b	15.8333	24.4333	2.94444	28.1818
LOC301124	15.8333	19.5333	18	18.2727
Srp14	15.8333	14.6	7.55556	30.2727
Thra	15.7222	9.2	7.33333	40.5455
Uhmk1	15.7222	5.2	22.2778	3.09091
Dnajc8	15.6389	3.3	5.33333	27.4545
Cbx6	15.6111	10.4333	7.88889	4
Prkar1b	15.5	12.8333	5.66667	41.8182
Cnfn	15.5	1.16667	1	1
Rpl23a	15.4722	16.1	9.33333	15.6364
Oaz2	15.4722	9.36667	41.2778	22.3636
Atp6v1e1	15.4444	12.1667	45	63.1818
Scd2	15.3611	4.33333	9.5	29.0909
Ywhah	15.3056	23.1667	22.0556	38.8182
Rpl34	15.3056	15.5667	31.5	31.3636
Trim44	15.3056	5.76667	24.3889	16.2727
Rps5	15.3056	9.83333	12.9444	10.7273
Cerk	15.2778	5.96667	12.2222	3.18182
Dennd5a	15.1667	4.33333	4.72222	2.27273
Bsg	15.1389	15.0333	4.77778	9.54545
Atp6v1g2-RT1-CE14	15.0833	6.46667	51.8889	5.81818
Cst3	15.0556	39.2333	16.7778	9.72727
Ywhaz	15	19.6	9	50.6364
Vamp2	15	14.0333	14.5556	11
Cox6b1-004303	14.9444	20.1	10.5556	6.81818
Ppm1l	14.8889	9.53333	2.22222	4.63636
Mrps26	14.8889	2.2	1.77778	2.36364
Phpt1	14.8333	8.76667	10.6111	5.09091
Srpk2	14.7778	4.76667	9.38889	4
Ap2m1	14.7222	15.5333	27.6667	12.4545
Hspd1	14.7222	10.5	3.61111	3.36364
Cmip	14.6944	7.5	20.7222	10.9091
Prepl	14.6389	8.5	5.33333	6.36364
Dgkd	14.5833	4.1	7.5	4.72727
Atp6v1b2	14.5	34.8333	12.1111	6
Slc30a9	14.5	8.9	2.5	2.90909
Tubb5	14.4722	18	6.55556	11.7273
Cracd	14.4722	10.6667	38.8333	9.54545
Fkbp3	14.3611	7.06667	13.1111	22.6364
Pds5b	14.3056	2.36667	2.88889	5.27273
Rpl15	14.2778	9.5	7.83333	3.90909
Tll1	14.25	4.26667	1.66667	2.27273
Adcy1	14.25	3.9	1.88889	2.54545
Med17	14.25	1	1	1
Ndufs7	14.2222	20	16.6111	4.18182
Ran	14.1944	23.1333	8.33333	43.1818
Fdx2	14.1944	4.53333	15.6667	2.72727
Smim29	14.1944	4.03333	2.16667	2.81818
Sub1	14.1667	19.8333	15.1111	5.36364
Trim2	14.1667	14.7333	6.16667	10.5455
Uqcrc2	14.1667	7.13333	4.27778	8.18182
Dusp3	14.1667	3.86667	6.61111	2.90909
Mrpl52	14.1111	17.9	7.88889	2.63636
Nop10	14.0833	11.1333	23.6667	21.1818
Anapc11	14.0556	9.13333	16.4444	2.81818
Uqcc2-148830	14.0278	4.83333	2.5	2.45455
Dpm2	14.0278	4.8	10.2778	3.18182
Crtac1	14.0278	3.2	2.5	3.36364
Pthlh	14.0278	2.36667	1.83333	2.45455
Zfp106	14	25.5333	9.38889	2.72727
Rab18	14	9.36667	7.66667	2.36364
App	13.9722	17.2667	6	44.2727
Son	13.9722	15.9333	4.72222	5.54545
Pik3ca	13.9722	4.96667	1.77778	2.45455
Sv2a	13.9444	8.63333	27.2778	15.4545
Cfap36	13.9444	5.13333	9.55556	6.63636
Emc4	13.9167	3.23333	3.77778	3.54545
Stxbp1	13.8611	19.3667	13.9444	24
Mrpl43	13.8611	12.4333	7.5	4
Krtcap2	13.8611	5.6	2.33333	4.63636
Nap1l1	13.8333	4.66667	15.3889	21.9091
Trappc8-B4galt6-Mapre2	13.7778	7.9	11.3333	3.09091
Arf1	13.75	15.8667	3.83333	7.45455
Nsf	13.7222	5.13333	4.77778	9.18182
Abhd8	13.6667	11.2667	5.83333	2.81818
Rab6a	13.6111	18.8	33.6667	148.364
Vcp	13.6111	14.1667	6.94444	20.9091
Mrpl42	13.5833	2	7.27778	2.36364
Ccny	13.5556	5.4	1.38889	2.45455
Akap11	13.5278	13.2333	26.1667	28.7273
Card9-Dnlz	13.5278	1.83333	23.5556	2.27273
Atp6v1g1-Tmem268	13.5	22.2	42.7778	10.9091
Lin7b	13.5	4.23333	1.61111	2.63636
LOC288913	13.5	3.5	9.55556	3
Stub1	13.4722	8.7	7.05556	6.36364
Fam162a	13.4444	12.7667	7.77778	4.36364
Pin1	13.4444	8.26667	13.1667	3.72727
Clasp2	13.4444	8.26667	32.5556	7.27273
Hdac5	13.4444	2.73333	8.22222	5.54545
Lsm12	13.4167	3.73333	15	3.18182
Eif4g2	13.3889	7.9	5.11111	25.6364
Serf1	13.3889	5.6	5.22222	2.90909
Hspa5	13.3611	15.0333	3.88889	18.0909
Peg3	13.3611	8.63333	14.2778	6.36364
Satb1	13.3611	6.16667	4.72222	4.27273
Mrpl20	13.3333	6.76667	9.72222	25.8182
Esd	13.3056	2.1	1.77778	2.45455
Npepps	13.25	9.33333	9.11111	12.8182
Ppp1cb	13.25	5.73333	17.4444	8.18182
Rtn4	13.2222	9.06667	10.7222	5.27273
Ppp2r2b	13.2222	7.3	15.3333	16
Ccser2	13.2222	2.9	1.77778	2.45455
Ecpas	13.1944	3.16667	6.11111	3.54545
Pcp4l1	13.1389	12.1333	15	2.45455
LOC108352127	13.1389	9.43333	9	2.27273
Tmod2	13.1111	27.3333	19.4444	52.8182
Mea1	13.0556	9.16667	8.83333	3.45455
Pnoc	13	11.9	4.5	3.63636
Poldip2	13	2.2	2.22222	2.54545
Vps41	12.9167	3.26667	6.11111	8.54545
Mapt	12.8611	12.8667	11.4444	7.54545
Rab11a	12.8611	2.53333	4.61111	2.90909
Kif5a	12.8056	49.7	45.2222	15.9091
Rnf187	12.8056	13.8667	16.4444	14.1818
Mlf2	12.8056	6.86667	8.72222	6.72727
Pcnp	12.75	11.6333	25.1111	8
Edf1	12.75	9.86667	10.4444	3.63636
Pmvk	12.7222	39.3333	18.1111	3.54545
Myg1	12.7222	5	1.38889	4.18182
Ift20	12.7222	2.9	3.94444	2.81818
Mef2c	12.6944	22.0667	10.1111	4.54545
Idh3B	12.6944	18.1	8.72222	3.72727
Selenok	12.6944	9.53333	9.5	3.45455
Dnajc19	12.6944	4.6	5.27778	10.8182
Clvs1	12.6667	1.56667	1.33333	1.63636
Rpl14	12.6389	13.6667	12.5556	38.7273
Rpl22l1	12.6389	9.03333	8.33333	6
Sdhd	12.5833	5.73333	7.55556	6.36364
C1qbp	12.5556	8.2	6.88889	3.45455
Uhrf1bp1l	12.5556	4.2	9.94444	2.63636
Usp14	12.5278	8.73333	17.7778	12.3636
Plxna4	12.5278	6.16667	2.27778	2.81818
Rnf115	12.5278	1.7	1.33333	1.63636
Prdx5	12.5	11	17.1111	5.90909
Higd1a	12.5	9.76667	5.27778	3.45455
Enho	12.5	5.2	6.11111	11.1818
2210016L21Rik	12.4167	18.6	12.5556	10.3636
Pkp4	12.4167	6.06667	16.5	48.2727
Trak2	12.3611	2.46667	4.44444	7.45455
Slk	12.2778	18.0333	5.94444	4.90909
Ufc1	12.2778	4.53333	3.16667	24.9091
Tmem59l	12.2778	4.43333	11.4444	4
Lamtor2	12.25	8.33333	3.38889	42.7273
Hnrnpu	12.25	5.63333	9.55556	5.09091
Ppp2r5c	12.1944	3.43333	3.5	4.63636
Pgam1	12.1667	14.7333	15.3333	6.72727
Ncl	12.1667	9.96667	18.5556	33
Psmb4	12.1667	6.03333	6.05556	47.0909
Atp2a2	12.0833	5.83333	3.55556	13.1818
Tubb2a	12.0556	28.2	11.5556	10.2727
Ppp1r9b	12.0278	10.0333	3.77778	4.90909
Dad1	12.0278	3.86667	7.22222	6.54545
Myh10	12	6.3	21.1667	6.81818
Dbndd1	12	4.73333	1	3.09091
Tmem229b	11.9722	2.86667	7.11111	4.72727
Isca1	11.8889	5.43333	8.11111	6.81818
Ubc	11.8611	13.3333	5.33333	11.3636
Pja2	11.8056	15.1333	5.61111	7.81818
Ctbp1	11.8056	11.9333	6.94444	3.27273
Ndufs1	11.8056	9.53333	2	5.36364
Fbxo10.2	11.7778	23.6667	8.5	4
Cox6a2	11.7778	10.8333	5.22222	2.27273
Rpl3	11.75	15.8333	12.8889	199.273
Dynll2	11.75	11.9333	41.3333	6.72727
Bola3	11.75	5.66667	14.3889	4.54545
Tpm1	11.7222	10.0667	11.2778	3.63636
Ppp2r2c	11.7222	8.16667	6.77778	19.0909
Tspyl4	11.6944	31.2333	15.7778	9.36364
Ccdc50	11.6944	8.46667	4.5	8.18182
Trappc4	11.6944	4.86667	1.44444	1.63636
Luc7l3	11.6944	4.46667	14.5	4.81818
Sh2d5	11.6944	1.36667	4.66667	1.54545
Eif1	11.6667	25.3667	17.5556	8.09091
Otub1	11.6667	13.6	7.94444	4.27273
Rab2a	11.6667	9.3	13.2222	12.2727
Prkar1a	11.6667	7.9	7.77778	7.63636
Klhl13	11.6667	7.66667	27.8333	5.09091
Lancl1	11.6667	7.5	4.72222	24.6364
Ap2s1	11.6667	6.06667	6.38889	4.72727
Nudt4	11.6667	5.76667	7.88889	5.27273
Bmerb1	11.6389	9.7	7.55556	7.18182
Polr2f	11.6111	9.86667	2.05556	3.36364
Eef1g	11.6111	7.86667	7.66667	3.18182
Borcs7	11.6111	3.23333	6.66667	19
Dipk1b	11.5556	3.73333	5.61111	2.54545
Actr1a	11.5556	2.96667	4.05556	2.54545
Nckap1	11.5278	10.3	9.11111	16.9091
Dynll1	11.5278	4.96667	15.2222	6.63636
Amfr	11.5	9.26667	2.44444	21.5455
Hpf1	11.5	2.76667	2.77778	6.45455
Serinc1	11.4722	8.1	3.05556	15.4545
Akap6	11.4722	7.43333	5.83333	5.18182
Cemip	11.4444	6.33333	1.72222	2.27273
Pgm2l1-AABR07004881.1	11.4167	11.5667	10.2778	17.7273
Ube2d3	11.4167	9.76667	26.1111	22.2727
Sez6	11.4167	5.1	2.05556	3.09091
Mrpl45	11.4167	2.53333	5.94444	2.63636
Gadd45gip1	11.3889	7.86667	2.94444	6.36364
Cdc42bpa	11.3889	6.2	3.44444	5.18182
Acyp2	11.3333	8.76667	10.7778	3.09091
Rpl18	11.3333	6.8	9.27778	3.63636
Txn1	11.3333	6	11.0556	8.54545
Eif2s2	11.3056	8.33333	3.83333	12.0909
Gatc	11.3056	3	1.11111	1.45455
Ndufa13	11.2778	28.5	27.7778	10.6364
Uqcrfs1	11.25	17.3	44.5	8.27273
Nmt2	11.25	16.8667	13.6667	12.6364
Pam	11.2222	12.9333	3.55556	94.1818
2510009E07Rik	11.1667	7.96667	2.94444	2.81818
Eif3j	11.1667	5.1	12.2778	3.81818
Ppp3ca	11.1111	14	3.55556	12
Med21	11.1111	3.2	1.33333	3.63636
AC141489.1	11.0833	27.1	10.6667	3.09091
Ube2o	11.0833	4.3	1.83333	2.27273
Zfr	11.0833	4.23333	6.16667	4
Rspry1	11.0833	4.03333	1.33333	1.63636
Nsmf	11.0556	30.9333	6.94444	32.3636
Ntrk2	11.0556	13.1	4.05556	8.18182
Acot7	11.0278	21.4667	8.33333	6.36364
Sptbn2	11.0278	12.1667	15.3889	57.9091
Cfl2	11	8.03333	7.55556	32.6364
Ankrd13b	11	3.16667	1.33333	2.36364
Dbi	10.9722	14.7	19.9444	5
Pfdn2	10.9722	4.4	10.5556	4.09091
Slirp	10.9444	2.46667	3.88889	2.54545
Hypk	10.9167	11.9333	29.8889	3.54545
Tceal9	10.8889	7.3	13.1667	13.9091
Arpc3	10.8889	3.73333	6.88889	3.72727
Eif3g	10.8889	2.13333	1.77778	2.45455
Mcrip2	10.8889	1.56667	4.38889	1.63636
Chst2	10.8611	10.6333	8.11111	6.90909
Mycbp2	10.8333	5.86667	6.11111	12.9091
Htatsf1	10.7778	3.3	4.05556	2.27273
Ubl3	10.7778	2.56667	5.38889	2.18182
Gng3	10.75	10.8667	2.38889	6.18182
Gap43	10.7222	39.3	54.4444	37.9091
N4bp2l2	10.7222	11.6	9.88889	15.0909
Flrt2	10.6667	9.16667	1.55556	1.63636
Pnma8b	10.6667	6.73333	7.11111	35.3636
Csdc2	10.6667	3.7	2.77778	1.63636
Ensa	10.6389	23.4	10.4444	8
Dgkz	10.5833	17.5	3.27778	5.27273
Diras1	10.5278	19.8	6.05556	3.09091
Pgp	10.5278	12.8333	4.05556	12.8182
Osbpl1a	10.5	8.63333	7.5	4
Zfp638	10.5	4.23333	2.05556	32.3636
Mkks	10.5	3.03333	9.61111	3.27273
Dctn3	10.4444	14.6667	12.7778	5.27273
Grin2b	10.4444	9.3	3.83333	4.27273
Rpl4	10.4444	8.36667	11.3333	8.18182
Tsc2	10.4167	9.56667	1.94444	1.72727
Lsm7	10.4167	8.76667	10.1667	5.63636
Hccs	10.4167	3.36667	1.33333	1.54545
Fez1	10.3889	23.3333	16.8333	5.72727
Dst	10.3889	13.0667	8.22222	8.09091
Ndufv1	10.3889	8.83333	2.33333	6.63636
Tmem151b	10.3889	5.7	7.38889	10.4545
Nus1	10.3889	5.23333	4.5	3.72727
Scand1	10.3889	2.76667	8.77778	4.72727
Pcdh11x	10.3611	22.4	11.3333	4.90909
Gpr35-Gpc1-Aqp12a-Olr1349-Olr1353-Olr1352-Olr1346-Olr1347-Ppp1r7-Rnpepl1-Olr1351-Sned1-Capn10-Agxt-Olr1350	10.3611	10.9	6.22222	4.09091
Slc6a1	10.2778	27.2	9.88889	4.09091
Agap1	10.2778	10.1667	10.6111	9.54545
Rps26	10.2778	6.7	6.16667	3.54545
Glrx3	10.2778	6.23333	8.5	4.45455
Elovl4	10.2778	2.16667	2.61111	5.27273
Nol7	10.25	4.43333	4.55556	2.72727
Bin1	10.1944	9.4	2.38889	8.27273
Ubb	10.1667	9.2	11.6667	7.90909
Vdac3	10.1389	6.66667	11.1111	3.63636
Fam20b	10.1389	4.96667	2.33333	1.72727
Pten	10.1389	3.1	4.05556	8
Epha4	10.1389	1.9	1.72222	2.27273
Kiaa0408L	10.1111	12.8667	7	4.09091
Znrf1	10.1111	8.86667	3.05556	5.27273
Mrpl55	10.1111	3.13333	11.5556	2.45455
Tomm20	10.0833	32.7	3.05556	8.81818
Atp6v1c1	10.0833	14.8333	9.94444	6
Ptpn11	10.0833	12.2333	3.33333	6
Smc1a	10.0833	2.4	2.16667	2.81818
Scg2	10.0556	26.6667	16.8889	9.81818
Ndn	10.0556	17.9667	4.77778	29.6364
Mrps18a	10.0278	32.3333	3.05556	8
Pafah1b1	10.0278	10.8333	19.8889	13.3636
Usp22	10.0278	10.8	1.83333	2.54545
Phyhipl	10.0278	7.5	6.61111	4.09091
Kcna2	10.0278	5.33333	2.77778	59.7273
Asph	10.0278	4.5	2.33333	5.90909
Rab8b	10.0278	2.56667	1.33333	1.63636
Cep19	10	10.2667	3.05556	2.36364
Hspbp1	10	9.4	3.88889	5.27273
Ptdss2	10	3.66667	5.05556	4.18182
Psma5	9.97222	11.5667	11.3333	9.63636
Setd3	9.94444	1.96667	1.66667	2.27273
Hint1	9.91667	4.86667	7.5	4.54545
Strbp	9.91667	3.43333	2.77778	3.18182
Nfat5	9.91667	1.6	1.44444	2.18182
Strn3	9.91667	3.13333	2.05556	2.72727
Psmd4	9.91667	3.03333	4.55556	4.72727
Sdr39u1	9.88889	1.83333	1.61111	1.90909
Enah	9.86111	14.5333	16.6111	3.45455
Ptov1	9.86111	13.8667	10.6111	6.72727
Phlda1	9.86111	3.63333	1.72222	3.81818
Spop	9.83333	11.5333	3.61111	4.63636
Tspan3	9.83333	17.7667	11.3333	27.3636
Park7	9.83333	10.5	11.6111	7.72727
AABR07019061.1	9.83333	8.9	8.94444	6.18182
Fkbp2	9.83333	3.76667	8.44444	3.36364
Celf2	9.80556	20.7	2.83333	5.27273
Rpl29	9.80556	11.5333	13.3333	10.3636
Sec61g	9.80556	4.9	10.7222	20.3636
Mapk8ip1	9.77778	17.5	13.0556	6.54545
Rps3a	9.77778	8.73333	9.05556	3.09091
Ncs1	9.77778	5	5	7.45455
Tmcc2	9.75	2.83333	3.33333	1.63636
Mrpl21	9.75	12.0333	3.27778	1.72727
Oxr1	9.75	10.3333	28.5	3.54545
Wwp1	9.75	6.76667	6.22222	3.09091
Git1	9.75	2.86667	8.33333	31.8182
Cadps	9.75	2.16667	2.83333	2.90909
Nedd4	9.72222	21.8	4.16667	13
Shc3	9.72222	13.9333	1.88889	10.3636
Mdh2	9.72222	5.5	6.61111	5.09091
Idh3a	9.72222	3.36667	2.83333	4.72727
Ubfd1	9.72222	2.43333	3.33333	2.27273
Zranb1	9.72222	1.86667	9.83333	1.81818
Coprs	9.69444	8.9	5.22222	2.63636
Ppp1cc	9.69444	5.7	9.44444	6.18182
Dazap2	9.69444	4.86667	5	1.63636
Pnpla8	9.66667	22.9667	2.77778	3.09091
Tomm22	9.66667	22.1667	2.94444	3
Map1lc3b	9.66667	18.1667	4.55556	12.5455
Rex1bd	9.66667	18.0667	2.72222	49.2727
LOC102547802	9.66667	1.43333	6.5	1.54545
Maged1	9.63889	10.5333	8.72222	6.18182
Taok1	9.63889	6.26667	11.0556	32.4545
Prpf3-Mrps21	9.63889	5.96667	10.5556	5.90909
Far2	9.63889	3.8	1.33333	1.63636
Got1	9.63889	3.63333	2.38889	4.36364
Bpnt1	9.61111	16.4	6	2.54545
Hspe1	9.61111	8.53333	15.8333	11.5455
Ubl5	9.61111	8.23333	4.44444	3.09091
Rabac1	9.58333	14.0667	12.1111	6.54545
Dlat	9.55556	18.0333	11.2222	6.09091
Hp1bp3	9.55556	15.3	5.27778	3.27273
Zfp385d	9.55556	6.96667	3.88889	2.81818
Ndufa10l1	9.55556	3.86667	8.72222	6.72727
Tomm70	9.55556	2.9	2.33333	3.09091
Zmat3	9.52778	11.7667	16.8889	2.45455
Nipa1	9.52778	4.6	10.8333	5.09091
Dync1li2	9.5	16.4667	2.22222	3.09091
Actr10	9.5	8.73333	2.33333	3.18182
Rps19bp1	9.5	3.06667	1.88889	3.27273
Nf1	9.5	2.23333	1.77778	2.45455
Gpm6a	9.47222	23.9	8.77778	30.9091
Tubb3	9.47222	9.9	4.88889	3.72727
Mrps14	9.47222	7.63333	5.05556	7.90909
Atcay	9.47222	6.76667	9.61111	3.81818
Nudt21	9.44444	7.1	1.88889	5.45455
Ankrd12	9.44444	6.7	23	3.63636
Mysm1	9.44444	2.36667	8.66667	2.45455
Kif1b	9.41667	35.9667	23.7778	14.3636
Ndfip1	9.41667	24.2333	17.5	29.4545
LOC100912195	9.41667	6.46667	5.88889	6.54545
Psmc5	9.38889	4.03333	2.38889	3.54545
Pum2	9.36111	3.4	6.61111	20.9091
Fbxo44-Fbxo6	9.33333	2.53333	1.44444	10.4545
Gdi1	9.33333	9.16667	10.2222	4.54545
Gria2	9.30556	24.0667	21.2222	15.6364
Mpc1	9.30556	20.2333	5.66667	4.27273
Sh3bgrl3	9.30556	11.8667	15	17.8182
Nrcam	9.30556	4.23333	5.77778	3.72727
Nsg1	9.27778	8.9	6.33333	11.9091
Mrpl51	9.27778	2.33333	17.8889	2.18182
Syt11	9.25	18.5	6.77778	10.8182
Sec61b	9.25	15.9	6.38889	3.09091
Slc32a1	9.25	4.73333	9	2.45455
Mtmr3	9.25	4.4	1.38889	1.63636
Tax1bp1	9.25	3.33333	2.66667	8
Cfl1	9.22222	7.53333	8.55556	13.9091
Ddhd2	9.22222	1.56667	1.33333	1.63636
Iscu	9.19444	12.1333	5.94444	12.4545
Wnk1	9.19444	7.4	5.61111	2.54545
Chchd1	9.16667	9.1	26.5556	3.09091
Mras	9.16667	1.56667	5.88889	9.63636
Ube2k	9.13889	15.7	19	25.7273
2020-09-03	9.13889	5.1	6.88889	6.09091
Ap2a2	9.13889	5.06667	3.94444	3.09091
Necab2	9.13889	3.96667	2.38889	17.0909
Slc22a17	9.11111	10.8	4.77778	15.5455
Cited2	9.11111	5.76667	2.27778	21.4545
Selenot	9.08333	2.76667	6.44444	5.72727
Sparcl1	9.08333	2.73333	9.61111	3.09091
Rbsn-Mrps25	9.05556	13.6667	11.1111	3.36364
Fem1b	9.05556	4.53333	10.0556	3.45455
Dclk1	9.02778	12.3667	17.1111	13.1818
Rpl21	9	12.8333	8.33333	9.54545
Cisd2	9	11.2667	12	3.72727
Snx27	9	2.13333	5.27778	2.45455
Rnf10	8.97222	3.53333	22	7
Mctp1	8.94444	6.06667	2.33333	2.27273
Acly	8.94444	5.2	5.88889	5.45455
Serbp1	8.94444	4.1	5.61111	19.9091
Bptf	8.94444	2.33333	2.27778	8.09091
Pcdha11-Pcdha9-Pcdha8-Pcdha3-Pcdha10-Pcdha4-Pcdha7-Pcdha1-Pcdhac2-Pcdhac1-Pcdha2-Pcdha6-Pcdha13-Pcdha12-Pcdha5	8.91667	8.23333	16.7222	6.54545
Ppp3cb	8.91667	5.36667	3.44444	3.27273
Nars	8.88889	8.23333	3.16667	15.4545
Rcan2	8.88889	7.2	16.7778	3.27273
Apba1	8.88889	6.83333	7.72222	4
Ttc1	8.88889	5.46667	9.94444	7.09091
Rbfox1	8.86111	2.06667	2.33333	7
Tango2	8.80556	3.66667	3.72222	8.27273
Atp6v1d	8.80556	29.7	12.0556	9.18182
Brk1	8.80556	12.6	9.55556	3.45455
4932438A13Rik	8.80556	7.56667	4.88889	5.18182
Gnb1	8.80556	6.93333	6.05556	8.27273
Atp6v1a	8.75	13.8	13.9444	5.63636
Rab14	8.72222	14.9	20.1111	4.72727
Rab27b	8.72222	7.5	7	2.54545
Rpl7	8.72222	7.4	17.7222	2.90909
Acat1	8.69444	6.1	8.22222	3.27273
Elof1	8.69444	2.43333	1.38889	1.63636
Slc25a17-St13	8.66667	8.1	20.4444	5.09091
Zbtb4	8.66667	3.86667	1.72222	2.27273
Timm22	8.63889	1.6	2.72222	1.72727
Gstp1	8.61111	7.6	2.44444	2.45455
Ninj1	8.61111	3.33333	3.11111	6.90909
Flywch1	8.61111	2.83333	2.22222	18
LOC691995	8.58333	1.23333	3.72222	1.45455
Fam57b	8.55556	10.2667	5.33333	2.45455
Rb1cc1	8.55556	7.33333	15.8333	3.27273
Cdipt	8.55556	3.73333	5.88889	2.81818
Rps23	8.52778	4.56667	4.55556	15.1818
Dld	8.5	23.5333	4.33333	3.18182
Tuba4a	8.47222	11.8333	6.88889	20.2727
Napg	8.47222	8.93333	2.72222	3.54545
Tbc1d9	8.44444	3.06667	2.83333	2.54545
Mrps23	8.44444	4.03333	2.5	6.45455
Chd3	8.41667	22.5667	6.38889	5.54545
Anapc13	8.41667	6.46667	5.44444	2.45455
Ptpn4	8.41667	3.16667	16.1111	2.27273
Clpb	8.38889	20.5	4.05556	2.36364
Kras	8.38889	10.1333	10.0556	17.9091
Gatd3a	8.38889	6.46667	4.33333	3.09091
Lamtor4	8.38889	4.63333	7.66667	2.54545
Med10	8.38889	3.26667	3.11111	6.18182
Impa1	8.38889	2.63333	1.77778	2.45455
Rnf114	8.38889	2.4	1.33333	1.54545
Chmp2a-Ube2m	8.36111	7.53333	4.83333	8.27273
Tmx4	8.36111	4.7	2.55556	5.72727
Camk2b	8.33333	12.2333	5.61111	24.2727
Eif1b	8.33333	7.4	14.4444	3.54545
Cox20	8.33333	2.13333	5.05556	2.45455
Syngr3	8.30556	18.3333	12.4444	4.27273
Aprt	8.30556	12.0667	4	15.5455
Vps28	8.30556	2.9	4.72222	2.90909
Thoc7	8.30556	2.16667	2.61111	10.8182
Smg1	8.30556	1.93333	9.16667	2.27273
Pea15	8.27778	13.0333	4.66667	8.36364
Arhgef9	8.27778	8.23333	4.72222	8.72727
Ndufb3	8.25	9.63333	6.5	2.81818
Aff4	8.25	6.26667	11.3889	33.5455
Mrpl34	8.25	1.6	8.33333	1.72727
Uqcrc1	8.22222	5.86667	10.5	6.45455
Atrx	8.22222	4.46667	2.5	12.1818
Mto1	8.22222	2.36667	1	1.09091
Dnmt3a	8.19444	7.2	12.4444	4
Srrm2	8.19444	6.26667	4.33333	15.5455
AABR07027870.1	8.19444	3.73333	2.05556	2.63636
Arhgap5	8.19444	3.3	6.16667	5.27273
Anapc5	8.16667	7.43333	3.94444	40.3636
1110008P14Rik	8.16667	5.63333	15.3889	3.81818
Chd4	8.16667	3.43333	9.94444	3.27273
Parp6	8.13889	4.36667	2.05556	2.18182
Cdk16	8.13889	3.86667	1.33333	1.63636
Gnl3	8.13889	2.8	1.83333	1.72727
Cab39	8.11111	30.2333	6.33333	2.90909
Arl6ip4	8.11111	6.6	2.61111	2.54545
Higd2a	8.11111	6.33333	8.16667	3
Tusc2	8.11111	4.73333	3.44444	3.27273
Chchd10	8.11111	4.23333	5.88889	11.2727
Kcmf1	8.11111	2.13333	4.55556	4
Klhl24	8.08333	8.1	3.88889	2.45455
Eif3a	8.08333	16.0333	2.44444	3.18182
1110004F10Rik	8.08333	4.86667	5.66667	12.2727
Tut7	8.08333	1.56667	2.38889	17.0909
AABR07069454.1	8.08333	1	1	1
Mindy2	8.05556	16.8667	1.83333	2.54545
Anp32e	8.05556	7.8	11.7222	9.36364
Asnsd1	8.05556	4.06667	6.05556	9.27273
Hdlbp	8.05556	3.56667	3.44444	3.81818
Rpl10	8.02778	5.66667	5.33333	3.18182
LOC102556967	8.02778	1	1	1
Chmp5	8	7.5	9.44444	10.5455
Psenen	8	6	3.05556	3
Serinc3	8	3.2	2.77778	2.90909
Krt222	8	1.4	1.16667	1.54545
Rock2	7.97222	7	3.5	14.7273
Gnl3l	7.97222	6.4	5.72222	4.36364
Rrnad1	7.97222	1.9	1	1.09091
Mcrs1	7.97222	1.7	1.55556	1.63636
Cct5	7.94444	10.2333	3.38889	3.36364
Cdk14	7.94444	8.3	5.55556	2.54545
Tkt	7.94444	6.43333	2.72222	3.09091
Serp2	7.91667	16.2667	3.88889	6.72727
Dlg2	7.91667	5.56667	2.16667	3
Tspan17	7.91667	2.23333	6.33333	4.36364
Smim26	7.88889	9.56667	16.7778	5.18182
Rab2b	7.88889	8.66667	1.66667	2.54545
Nefh	7.88889	7.1	3.22222	2.54545
Letm1	7.86111	10.5333	2.33333	7.90909
Rnf7	7.86111	6.36667	2.22222	1.63636
AABR07006476.1	7.86111	2.33333	1.88889	2.54545
Tex261	7.86111	2.03333	1.44444	1.54545
Bmi1-Commd3	7.83333	3.3	14.5	3.72727
Armcx2	7.83333	1.93333	4.33333	2.18182
Dnaja1	7.80556	11.5	13.6111	25.2727
Dnajc5	7.80556	7.36667	5	3.18182
Eprs	7.80556	6.3	3.05556	4.18182
Dact3	7.80556	3.6	7.11111	1.81818
Reep2	7.80556	2.43333	2.05556	2.63636
Ckmt1	7.77778	13.2333	10.6667	5.45455
Selenof	7.77778	9.63333	4.38889	4.54545
Pgls	7.77778	5.9	16.3889	2.18182
Sgip1	7.77778	3.2	8.16667	7.45455
Tsc22d3	7.77778	1.86667	5	2.27273
Scoc	7.75	14.3	12.5	10.0909
Mprip	7.75	5.53333	2.88889	5.72727
Wdr1	7.75	3.1	2.16667	2.27273
Ddx24	7.72222	13.2	6.66667	4.27273
Kpnb1	7.72222	4.06667	5	2.90909
Hpcal4	7.72222	3.23333	4.83333	49.5455
Ndufaf8	7.72222	2.66667	1.72222	2.72727
Ndel1	7.72222	2.36667	1.94444	2.63636
Cul3	7.69444	10.9333	2.22222	4.90909
Prkar2a	7.69444	6.63333	3.16667	2.45455
Kif2a	7.69444	5.46667	6.38889	5.18182
Itpa	7.69444	4.06667	7.72222	2.45455
0610010F05Rik	7.69444	1.73333	1.61111	2.18182
Rimkla	7.69444	1.6	2.38889	1.72727
Zrsr2	7.66667	8.03333	3.11111	3.18182
Snapin	7.66667	4.2	3.77778	20.4545
Zdhhc21	7.66667	2.26667	2.44444	2.63636
Casp8ap2	7.66667	1.56667	1.33333	2.09091
Sat1	7.66667	8.73333	6.44444	2.27273
Sod2	7.63889	11.4333	4.16667	11.2727
LOC306766	7.63889	3.43333	10.8333	4.36364
Psmd12	7.63889	3.03333	2.27778	18.7273
Pip5k1c	7.61111	10.4667	19.4444	7.63636
Cacnb4	7.61111	6.36667	4.05556	3.09091
Bzw2	7.61111	4.46667	2.22222	38.2727
Nifk	7.61111	2.83333	8.38889	7.72727
Csnk1g3	7.61111	1.73333	9.11111	1.63636
Flrt3	7.61111	1.6	1.61111	1.63636
Arid5a	7.61111	1.13333	1.05556	1.36364
Ankrd11	7.58333	11.1667	20.1667	19
Cuta	7.58333	8.6	6.22222	5
Slc3a2	7.58333	4.83333	7.88889	3.72727
Desi1-Nhp2l1	7.58333	3.73333	3.61111	4.45455
Denr	7.58333	2.33333	6.83333	2.54545
Bhlhb9-Gprasp1	7.55556	23.2	5.66667	4.63636
Slc35e3	7.55556	1.63333	1.16667	1.54545
Nnat	7.52778	16.7333	11.3333	157.182
Nrxn1	7.52778	8	4.38889	8.54545
Dnajb1	7.52778	7.83333	1.66667	2.18182
Gars	7.52778	7.2	10.5	3.27273
Pdap1	7.52778	5.33333	12.6111	11.2727
Wdr6.1	7.52778	4.23333	7.27778	8.18182
Tcaf1	7.52778	2.33333	2.05556	18.3636
Cacng2	7.52778	1.7	2.33333	2
Mrpl17	7.5	9.33333	27	3.45455
Sptan1	7.5	4.03333	3.88889	6.90909
Eps15	7.47222	14.9667	5.61111	4.36364
Kcna1	7.47222	11.8333	2.61111	5
Atp8a2	7.47222	5.26667	12.0556	3.27273
Cnih1	7.47222	2.2	2.94444	2.54545
Pde10a	7.44444	5.43333	5.77778	9.09091
Cd81	7.44444	3.56667	3.11111	4.18182
Trim54	7.44444	1	1	1
Ctdspl-Golga4	7.41667	5.46667	8.72222	3.09091
G3bp2	7.41667	4.53333	2.5	2.81818
Syt4	7.41667	3.4	2.27778	7.27273
Afdn	7.41667	3.33333	2.22222	27.7273
Dtna	7.41667	2.4	4.16667	2.90909
Rfng	7.41667	1.76667	1.83333	2.18182
Txndc17	7.38889	23.8667	1.38889	1.63636
Rheb	7.38889	8.96667	6.61111	3.45455
Tm9sf3	7.38889	5.26667	3.11111	3.81818
Nr2f1	7.36111	5.3	1.72222	2.27273
Zfand5	7.36111	3.13333	5.55556	9.18182
Fam213b	7.36111	2.6	4.66667	1.63636
1110065P20Rik	7.33333	18.6667	2.38889	2.27273
Eif4h	7.33333	5.63333	3.94444	4.09091
Serpini1	7.33333	4.13333	2.38889	13.6364
B3gat1	7.33333	3.96667	16.1111	7.81818
Rasal2	7.33333	1.56667	5	1.63636
Rab11b	7.30556	8	8.27778	25.4545
Supt5h	7.30556	2.86667	5.33333	4.81818
Pfdn5	7.30556	13.9333	4.44444	3.45455
Rpl17	7.27778	9.2	5	4.36364
Usp9x	7.27778	9.13333	2.55556	4.09091
Mapk10	7.27778	6.36667	11.4444	15.1818
Lbh	7.27778	6.36667	14.8889	3.09091
Ppdpf	7.27778	4.76667	3.66667	3
Matk	7.27778	4.76667	1.94444	2.27273
Ncdn	7.27778	2.73333	4.11111	6
Akt1	7.27778	2	2	1.63636
Coq10a	7.27778	1.4	1.16667	6.36364
Phactr1	7.25	35.4	12.2778	2.90909
Cs	7.25	7.26667	4.66667	8.09091
LOC108348287	7.25	4.33333	3.55556	2.27273
Nucks1	7.22222	15.5333	8.55556	9
Slc36a1	7.22222	8.4	3.11111	7.81818
mrpl24	7.22222	2.53333	8.83333	2.09091
Vta1	7.22222	2.26667	1.44444	1.81818
AABR07006258.2	7.19444	1.6	3.05556	1.72727
Vdac2	7.19444	8.16667	4	4.09091
Ufm1	7.19444	5.96667	9.5	2.63636
Eid1	7.19444	3.53333	7.72222	3.09091
Arpc4	7.19444	3.13333	5.27778	8.18182
Commd4	7.16667	8.86667	2.05556	2.63636
Nsg2	7.16667	6.2	4.72222	48.8182
Plxdc2	7.16667	2.66667	2	2.54545
Casp4	7.16667	1	1.22222	1
Lrpap1	7.13889	3.76667	2.05556	2.63636
Cbx1	7.13889	2.73333	2.33333	3.54545
Limch1	7.13889	2.46667	2.16667	2.90909
Cmpk1	7.11111	22.6667	5.77778	4.18182
Arnt2	7.08333	11.9	9.33333	19.2727
Atp6v0a1	7.08333	5.26667	6.5	3.27273
Add2-Tprkb	7.08333	3.4	1.66667	2.18182
Tbca	7.05556	14.0333	9.05556	17.0909
Spcs1	7.05556	8.26667	4.38889	6.09091
Ncald	7.05556	6.06667	6.44444	2.72727
Cops5	7.05556	2.96667	3.61111	3.09091
Ap3d1	7.02778	9.53333	2.77778	4.18182
Zfp771	7.02778	9.16667	1.77778	2.18182
Ppip5k2	7.02778	7.86667	5.77778	3.45455
Tmem30a	7.02778	6.83333	2.38889	3.72727
Zc3h15	7.02778	4.43333	5.33333	11.6364
Ubxn1	7.02778	2.2	12.6111	2.54545
Cpe	7	22.0333	11.3333	56.1818
Wasl	7	11.3	7.22222	57.1818
Nrxn3	7	10.1667	31.2222	5.09091
Gpm6b	7	7.46667	9.72222	11.0909
B3gat3	7	5.63333	1.77778	4
Clstn3	7	3.33333	2.44444	4.18182
Mzt2b	7	1.3	1.16667	1.81818
Pafah1b2	6.97222	16.9333	5.88889	4.81818
Ndufaf3	6.97222	15.7	2.05556	1.63636
Robo2	6.97222	11.6333	7.22222	8.54545
Snhg11	6.97222	7.06667	8.27778	6.90909
Ppm1e	6.97222	6.86667	2.27778	6.90909
Plppr5	6.97222	6.06667	7.61111	3
Acsl6	6.97222	2.66667	2.05556	6.63636
Cert1	6.97222	2.4	1.88889	2.45455
Zfp1	6.97222	1.03333	1	1.09091
Cpeb3	6.94444	5.16667	12.9444	19.9091
Tmem38a	6.94444	2.46667	1.77778	2.45455
Dzip1	6.91667	23.2	6.22222	3.09091
Hdac9	6.91667	8.26667	13.4444	3.09091
Hip1	6.91667	7.4	5.33333	3.63636
Cacna1a	6.91667	3.13333	2.38889	5.54545
Arf5	6.88889	8.46667	5.88889	51.2727
Tmem178b	6.88889	6	20.1111	36.1818
Rbis	6.88889	5.63333	5.44444	17.1818
Celf1	6.88889	2.26667	1.83333	2.54545
Pdcd6	6.88889	2.16667	1.83333	4.72727
Ralyl	6.88889	1.7	6.66667	17.0909
Canx	6.86111	26.8667	3.38889	6.63636
Marcks	6.86111	11.8	6.05556	4.45455
Mgll	6.86111	7	17.3333	2.54545
Tmem256	6.86111	5.3	21.7222	5.90909
Prrc2b	6.86111	4.1	10.1111	9.54545
Ndufs3-Ptpmt1	6.83333	11.3333	35.6111	7.63636
Habp4	6.83333	7.9	1.83333	1.72727
Gsto1	6.83333	4.4	5.22222	2.45455
Pja1	6.83333	3.7	10	9.36364
Esf1-156685	6.83333	3.13333	1.72222	2.27273
Rtn2	6.83333	2.03333	1.77778	1.63636
Fam133b	6.83333	1.96667	1.38889	1.63636
Tent5a	6.80556	1.43333	1.33333	1.54545
Eif4a2	6.80556	3.46667	7.44444	6.36364
Gmpr2	6.80556	1.8	1.38889	1.63636
Fbxo38	6.80556	1.23333	1	1.09091
Smap1	6.77778	11.3667	9.83333	3.45455
Ctsd	6.77778	9.76667	18.2222	3.81818
Pnma2	6.77778	4.8	2.16667	7.09091
Glud1	6.77778	3.86667	6.88889	5.72727
Stau2	6.77778	2.73333	4.11111	2.54545
Copg1	6.77778	2.33333	6.83333	6.45455
Araf	6.75	8.46667	19.2222	3.18182
Rell2	6.75	5.36667	7.16667	4.63636
AABR07010706.1-MetazoaSRP	6.75	3.5	1.94444	5.36364
Mrps34	6.75	2.63333	8.94444	2.54545
Cadm2	6.75	2.6	2.77778	2.36364
Cd47	6.72222	13.9	7	39.4545
Gipc1	6.72222	2.9	1.44444	1.90909
Ldhal6b-Tmem242	6.72222	2.83333	1.61111	2.18182
Ralgapa1	6.72222	2.33333	19.7778	5
Akap5	6.72222	1.7	1.44444	2
Mrps33	6.69444	7.93333	8.33333	3.63636
Olr1274-Rgs7bp-Olr1273-Olr1275-Olr1278-Olr1279-Olr1280	6.69444	5.4	20	9.54545
Herc2	6.69444	4.46667	13.1111	3.54545
Pip4p1	6.69444	3.93333	5	2.45455
Taf9-Ak6	6.66667	7.63333	2.27778	2.63636
Glyr1	6.66667	4.9	15.3333	2.54545
Apba2	6.66667	3.73333	6.55556	4.63636
Cd63	6.66667	2.9	10.3333	3.36364
Camsap1	6.66667	2.73333	2.05556	2.63636
Abcf1	6.63889	16.6667	7	28.0909
Nsa2	6.63889	9.8	14.5556	2.63636
Atp13a2	6.63889	9.3	7.33333	5.90909
2020-09-08	6.63889	8.23333	2.88889	8.36364
Gas7	6.63889	5.06667	16	22.2727
Sarnp	6.63889	2.53333	5.66667	29.0909
Ube2n	6.63889	2.13333	1.66667	3.09091
Ints4	6.63889	1	1	1
Rala	6.61111	6.36667	2.22222	3
Chmp3	6.61111	4.8	1.5	5.90909
Rplp1	6.61111	4.56667	4.22222	3.72727
Churc1	6.61111	3.33333	12.8889	10.8182
Lsm5-173559	6.61111	2.06667	1.44444	3
Bmpr2	6.58333	7.7	1.83333	3.72727
Trnp1	6.58333	7.3	2.05556	1.72727
Cmas	6.58333	3.5	10.8333	2.45455
Enpp5	6.58333	2.56667	5.94444	2.72727
Exosc4	6.58333	1.3	1.16667	1.45455
Pclo	6.55556	13.8333	15.1667	4.72727
Zdhhc2	6.55556	2.53333	3.16667	6.90909
Amz2	6.55556	1.73333	2.22222	6.18182
Vsig10l	6.55556	1	1.22222	1
Pld3	6.55556	5.4	8.27778	3.63636
Btaf1	6.52778	8.56667	24.2222	8
Picalm	6.52778	4.6	3.27778	2.18182
Scp2	6.5	6.36667	7.22222	7
Ttc7b	6.5	5.96667	1.44444	3.18182
Mphosph8	6.5	4.93333	2.5	6.27273
Psmb5-AC109100.1	6.5	3.56667	52.0556	5.90909
Dzank1	6.5	3.3	15.3889	7.09091
Ivns1abp	6.5	2.4	1.44444	2.09091
Dbndd2	6.5	1.1	1	1
Fbxo9	6.47222	5.73333	8.66667	4.36364
Mrpl35	6.47222	2.2	9.38889	6.81818
Taf5l	6.47222	1	1	1
Rc3h2	6.44444	24.3	1.83333	2.54545
Prelid1	6.44444	8.73333	5.5	6.63636
Eif3f	6.44444	7.1	7.33333	12
Mtch2	6.44444	2.66667	3.61111	4.09091
Rbm8a	6.44444	2.5	3.5	28.6364
Hsp90b1-AABR07056495.1	6.41667	17.4333	5.05556	8.18182
Ski	6.41667	13.1667	3.22222	2.27273
Csnk1a1	6.41667	7.3	7.94444	4.09091
Lrrc58	6.41667	6.13333	9.05556	9.27273
Wdr83os	6.41667	3.26667	15.7778	2.90909
Arl4c	6.41667	2.1	13.2222	2.27273
Tfrc	6.38889	5.23333	7.33333	3.72727
Ncoa7	6.38889	3.96667	4.27778	3.09091
Madd	6.38889	2.7	5.27778	2.54545
Gys1	6.38889	1.56667	1.11111	1.36364
Plppr4	6.36111	15.1667	2.66667	41.7273
Dnajc10	6.36111	7.7	8.61111	3
Clta	6.36111	5.46667	3.77778	5.90909
Gria3	6.36111	2.3	1.72222	2.27273
Fam91a1	6.36111	1.96667	1.61111	1.63636
Nmt1	6.33333	6.5	2.94444	7.54545
Arhgap35	6.33333	4.66667	2.11111	7.36364
Sptlc3	6.33333	4.6	1	1
Vars1	6.33333	2.36667	2.66667	1.63636
Laptm4b	6.33333	2.26667	1.72222	2.27273
Ubxn6	6.33333	1.56667	7	1.63636
Atf7	6.33333	1.5	1	1
Asxl2	6.33333	1.4	1.16667	1.54545
Phf14	6.30556	12.9333	5.88889	20.3636
Ddx5	6.30556	6.16667	6.11111	4.09091
BC031181	6.30556	5.53333	21.7222	10.0909
Pfkm	6.30556	5.2	2.94444	3.09091
Igf1	6.30556	2.03333	1.33333	1.63636
Sdf4	6.30556	2	2.66667	2.36364
Cyth3	6.30556	1.4	1.33333	1.54545
Ktn1	6.27778	6.6	2.66667	3.72727
Ociad1	6.27778	5.03333	3.11111	3.63636
Snx3	6.27778	4.8	8.88889	4.09091
Tnrc6a	6.27778	4.56667	2.77778	5.09091
Tssc4	6.27778	1.2	1.11111	1.36364
Ddx10	6.25	6.76667	1.44444	1.72727
Ptms	6.25	1.93333	2.22222	2.18182
Stard10	6.25	1.73333	1	1
Zfp236	6.25	1	1	1
LOC685963	6.22222	10.8667	4.38889	4.54545
Fsd1	6.22222	9.63333	1.44444	1.63636
Ndufs5	6.22222	6.66667	14.7778	2.54545
Idi1	6.22222	5.3	3.11111	14.9091
Fh	6.22222	2.46667	2.05556	8.81818
Mis12	6.22222	2.33333	3.33333	1.72727
Pc	6.22222	2.13333	1.61111	1.81818
Numbl	6.22222	2	4.66667	7.90909
Tbc1d8	6.22222	1	1	1
Syt13	6.19444	3.03333	6.44444	3.45455
Rnf19b	6.19444	1.1	1	4.45455
LOC102549726-RT1-CE14	6.19444	10.2667	2.11111	2.27273
Tmem167a	6.19444	5.3	1.77778	10.2727
Nfib-190674	6.19444	4.33333	8.44444	15.8182
Panx2	6.19444	3.96667	1.27778	9.18182
Strap	6.19444	3.46667	4.38889	2.63636
Mboat2	6.19444	2.36667	4.33333	1.63636
Gucy1a1-Gucy1b1	6.19444	2.26667	10.5556	2.63636
Suds3	6.19444	1.56667	4.33333	1.63636
LOC108351137-174229	6.16667	10.2	5.61111	11.0909
Dusp8	6.16667	4.26667	3.38889	4.72727
Pkig	6.16667	2.06667	1.33333	15.5455
Jund	6.13889	10.7333	5.05556	21
Zfp91	6.13889	8.13333	14.5	3.45455
Hadha	6.13889	3.86667	10.3333	2.27273
Rchy1	6.13889	1.63333	1.33333	1.54545
Ube2l3	6.11111	18	13.7222	17.5455
Ccdc124	6.11111	12.1667	12.6111	8
Arfgef3	6.11111	6.63333	2.16667	30.4545
Iqsec1	6.11111	5.03333	3.83333	2.63636
Eif4a1	6.11111	4.6	2.5	3.09091
Thtpa	6.11111	3.06667	1.44444	1.72727
Zcrb1	6.11111	2.8	7.22222	3.09091
Copb1	6.11111	2.16667	1.83333	3.27273
Smim8	6.11111	1.9	3.33333	1.63636
Wasf3	6.08333	3.9	12.7222	5.90909
Fam19a5	6.08333	3.06667	9.55556	2.54545
Trappc5	6.08333	2.3	10	17.8182
Hcrtr2	6.08333	1	1	1
Psma3l-Psma3	6.05556	4.96667	11.8333	6.27273
Rabgap1	6.05556	4.1	8.94444	2.27273
Eef1akmt1	6.05556	1.3	1.16667	1.45455
Map4	6.02778	19.4	10.3889	5.81818
Psap	6.02778	12.7333	3.72222	5.72727
Slc25a11	6.02778	9.76667	24.7778	4.09091
Zbtb47	6.02778	8.43333	2.55556	12.3636
Pacsin1	6.02778	2.53333	6.22222	2.45455
Preb	6.02778	2	3.77778	2.72727
Pitpna	6	21.0333	4.66667	7.45455
Dcun1d4	6	3.46667	1.72222	2.27273
St8sia3	6	3.3	7.38889	20.2727
Lmo4	6	2.76667	9	6.90909
Crbn	6	2.7	22.1667	1.63636
Phkb	6	1.2	1	1.18182
Rps7	5.97222	13.3333	4.33333	2.81818
Fbxw7	5.97222	4.9	4.27778	4.90909
Eef1b2	5.97222	4.23333	14.1667	3.27273
Stk25	5.97222	2.3	2.72222	2.27273
Adgrb3	5.97222	1.93333	1.72222	2.27273
Klhdc10	5.97222	1.8	1.44444	1.72727
Psmf1	5.97222	1.63333	1.55556	1.63636
Svop	5.94444	3.56667	3.27778	3.27273
Mat2b	5.94444	2.43333	1.66667	2.63636
Cttnbp2nl	5.94444	2.4	1.16667	1.54545
Selenoo	5.94444	1	1	3.45455
LOC100911177	5.94444	11.5333	4.44444	3
Mtpn	5.94444	4.6	12.6111	7.45455
Ube2v2	5.94444	4.1	4.22222	2.45455
Armcx3	5.94444	3.83333	7.16667	4.63636
Calr	5.91667	12.5333	6.27778	15.2727
Rap1gds1	5.91667	3.43333	4.66667	3
Rbbp6	5.91667	2.76667	1.83333	2.54545
Api5	5.91667	2.63333	1.44444	3.36364
Nav1	5.91667	1.7	1.55556	1.63636
Sf3b2	5.88889	5.86667	10.6667	5.45455
Lrrfip1	5.88889	4	2.33333	7.72727
Ddx42	5.88889	2.03333	1.83333	2.27273
Snrpd2	5.86111	7.53333	15.7222	12.7273
Chgb	5.86111	7.13333	3.5	10.8182
Cgref1	5.86111	4.23333	1.38889	1.63636
Cdk11b	5.86111	4	9.11111	5.54545
Acot9	5.86111	2.6	4.5	2.09091
Phb2	5.86111	1.93333	1.77778	2.72727
Ypel3	5.86111	1.86667	2.5	2.27273
Mapk6	5.83333	4.93333	1.44444	1.63636
Ttc9b	5.83333	3.36667	4.11111	2.81818
Eml4	5.80556	7.03333	6.38889	3.63636
Hnrnpk	5.80556	6.3	3.33333	5.54545
Tufm	5.80556	6	14.6111	5.90909
Cbarp	5.80556	5.9	9.38889	11.7273
Fbxl16	5.80556	5.83333	10.3889	4.18182
Syap1	5.80556	4.63333	2.27778	4.54545
Aldh7a1	5.80556	3.5	1.61111	2.18182
Zfp24	5.80556	1.7	1.38889	1.63636
Arpc5l	5.77778	6.23333	10.5556	4.45455
Pdlim7	5.77778	5.96667	1.88889	1.63636
Tom1l2	5.77778	3.33333	1.77778	2.36364
Msl1	5.77778	3.33333	17.7222	7.27273
Zfp637	5.77778	2.86667	2.44444	4.09091
Bag1	5.77778	2.06667	1.5	1.54545
Fnip1	5.77778	1.86667	2.16667	2.27273
Galnt1	5.77778	1.56667	4	1.63636
Dlx1	5.77778	1.56667	3.22222	1.63636
LOC499584	5.77778	1.3	1.61111	4.18182
Rnf214	5.75	16.3333	9.38889	4.36364
Ubqln2	5.75	8.5	6.22222	2.63636
Phactr3	5.75	5.76667	3.38889	3.27273
AABR07001382.1	5.75	4.7	3.72222	2.81818
Sgtb	5.75	3.33333	20.6111	3.27273
Gcc2	5.75	2.23333	2.72222	2.54545
Rab4a	5.75	2.2	1.77778	9
Spock3	5.72222	7.36667	3.5	3.45455
Hnrnpa2b1	5.72222	7.33333	7.55556	3.81818
Smarce1	5.72222	4.56667	3.11111	15.1818
Btbd2	5.72222	2.83333	2.05556	1.63636
Cdc34	5.72222	1.43333	1.55556	1.54545
Wiz	5.72222	1	1	1
Pkia	5.69444	6.93333	4.44444	11.6364
Cyfip2	5.69444	6.03333	4.16667	2.81818
Pmpca	5.69444	5.96667	1.44444	1.72727
Btbd6	5.69444	5.06667	4.61111	1.72727
Rack1	5.69444	4.23333	2.27778	2.45455
Chchd3	5.69444	4.16667	2.16667	2.81818
Birc6	5.69444	3.93333	7.83333	12.6364
Ano10	5.69444	3.93333	2.27778	10.3636
Ntpcr	5.69444	1.56667	5.22222	1.63636
Cycs	5.69444	3.3	2.77778	2.54545
Pbdc1	5.69444	1.6	1.44444	1.72727
Prkce	5.66667	16.5333	4	8.27273
Ndufaf5	5.66667	10.1333	1.44444	1.72727
Rian	5.66667	8.66667	6.16667	6.54545
Sars	5.66667	8.23333	2.88889	5.72727
Csnk2a1	5.66667	8.16667	11.9444	3.90909
Slc5a3	5.66667	4.8	5.94444	25.0909
Zfp62	5.66667	1.56667	1.72222	1.63636
Crcp	5.66667	1.56667	1.38889	1.63636
Ssu72	5.63889	15.0667	5.44444	3.09091
Kalrn	5.63889	9.66667	14.2222	8.72727
Sort1	5.63889	9.13333	7.05556	2.36364
Tecr	5.63889	5.5	3.33333	3.54545
Pink1-AABR07050212.1	5.63889	5	4.44444	4.72727
Maf	5.63889	4.66667	8.05556	3.81818
LOC689574	5.63889	2.7	10.6667	1.63636
Caprin1	5.63889	2.53333	12.5556	2.63636
Gabrb1	5.63889	2.03333	1.44444	27.4545
Arsb	5.63889	1.9	1.16667	1.45455
Nfyc	5.61111	8.4	1.33333	1.54545
Zcchc12	5.61111	8.1	2.44444	2.90909
Lpgat1	5.61111	6.76667	1.88889	2.45455
Selenos	5.61111	6.6	2.05556	2.63636
Srp19	5.61111	5.6	2.05556	2.72727
Rexo2	5.61111	4.06667	9.94444	3.36364
RF00439	5.61111	3.3	7.22222	2.45455
Arhgdia	5.61111	2.83333	6	5.90909
Mast2	5.58333	7.66667	2.88889	1.81818
Neto1	5.58333	5.5	6.38889	23.6364
Pcmt1	5.58333	3.5	1.83333	5.45455
Ralbp1	5.58333	3.26667	5.55556	3.54545
Rwdd1	5.58333	3.1	1.83333	2.54545
Eif4g3	5.58333	2.9	2.94444	2.81818
Psmd2	5.58333	2.76667	7.38889	4.54545
Cdc123	5.58333	2.03333	13	2.27273
Kctd9	5.58333	1	1	1
2020-09-11	5.55556	13.3333	15.6667	3.63636
Rpn1	5.55556	5.83333	2.38889	3.63636
Impact	5.55556	4.23333	10.3889	9.90909
Rhoa	5.55556	2.4	1.33333	1.63636
Sos2-207694	5.55556	1.36667	1.77778	1.54545
Ahsa1	5.55556	2.3	3.61111	2.45455
Wbp4	5.55556	1.83333	2.66667	1.72727
Erc2	5.55556	1.76667	2.11111	1.63636
Sqstm1	5.52778	3.23333	4.33333	13.5455
Gabra1	5.52778	2.93333	3.38889	2.81818
Rnps1	5.52778	2.86667	2.38889	2.45455
Ift57	5.5	11.6333	5.11111	2.45455
Fam49a	5.5	6.36667	12.6111	6
Eif3i	5.5	6.06667	3.88889	2.27273
Arl8b	5.5	6	9.27778	81.3636
Cct7	5.5	5.76667	6.22222	6.18182
Samd8	5.5	5.3	1.83333	2.54545
Pfkp	5.5	4.76667	8.61111	11.1818
Rpl13a	5.5	3.33333	7.72222	6.54545
Pcmtd1	5.5	3.33333	2.11111	11.3636
Taf10	5.5	3.26667	2.5	1.54545
Paf1	5.5	3	7.72222	13.4545
Rrp1	5.5	2.36667	3.55556	2.27273
Atrn	5.5	2.3	1.83333	2.54545
Hadhb	5.5	2	3.33333	17.7273
Slc35e2b	5.5	1.43333	1.33333	1.54545
Got2	5.47222	27.5667	5.16667	4.54545
Npdc1	5.47222	10.7333	8.83333	10.6364
Ndrg3	5.47222	10.3333	7.22222	3.36364
Fgf12	5.47222	4.86667	4.88889	7.54545
Zfp330	5.47222	3.06667	1.88889	1.63636
Kifap3	5.44444	9.53333	11.3333	22.5455
Nenf	5.44444	7.26667	1.55556	1.63636
Itm2c	5.44444	5.73333	2.72222	21.5455
Erh	5.44444	4.96667	3.33333	4.63636
Msra	5.44444	4.36667	6.61111	2.09091
Cep104	5.44444	3.7	11.4444	1.54545
Scg3	5.44444	3.36667	13.0556	7.63636
Rabep1	5.41667	13.8667	11.1111	19.0909
Mfn1	5.41667	5.03333	1.38889	1.63636
Ppp1r16b.2	5.41667	1.66667	5.33333	1.54545
Rtraf	5.38889	5.76667	6.61111	2.81818
Elavl1	5.38889	4.06667	1.44444	1.81818
Aamp	5.38889	3.3	3.44444	3.72727
Rabepk	5.38889	2.6	1.33333	1.63636
Reep1	5.38889	2.26667	2.44444	2.63636
Slc25a12	5.38889	1.6	1.83333	1.72727
Inpp5j	5.38889	1.56667	1.33333	3.18182
Tmem189	5.38889	1.56667	4.27778	1.63636
Cables2	5.38889	1.56667	2.11111	1.54545
Cntn4	5.38889	1.5	1.16667	1.54545
Rnf14	5.36111	7.06667	3.88889	6.45455
Pi4ka	5.36111	4.3	3.22222	4.36364
Epb41l3	5.36111	3.5	1.72222	3.09091
Lrpprc	5.36111	2.6	2.83333	3.09091
Svil	5.36111	1.7	2.94444	1.90909
Cnbd1	5.36111	1	1	1
Abr	5.33333	13.9	4.27778	17.3636
Rab1a	5.33333	7.5	9.55556	14.9091
Gpsm1	5.33333	6.7	2.61111	1.63636
Sos2-207693	5.33333	3.03333	8.05556	31.4545
Twnk	5.33333	1.6	2.77778	1.72727
Paxx	5.30556	31.6667	14.8889	2.54545
Rab3gap2	5.30556	22.2667	6.66667	4.36364
Cdc37l1	5.30556	9	4.77778	11.1818
Lrp1b	5.30556	5.4	1.83333	2.72727
Cds2	5.30556	5.33333	4.22222	3.09091
Stat3	5.30556	4.26667	4.94444	2.54545
Ptma-249998	5.30556	3.9	7.05556	19.2727
Cxxc4	5.30556	2.86667	11.0556	9.36364
R3hdm1	5.30556	2.76667	3.94444	3.18182
Mrps10	5.30556	2.7	4.16667	1.72727
Ccdc136	5.30556	2.56667	1.88889	2.54545
Pnkd-249879	5.30556	2.2	6.5	1.63636
Mllt6	5.30556	1.56667	3.83333	1.63636
Fgfr1op2	5.27778	8.56667	6.5	2.45455
Col19a1	5.27778	4.76667	2.44444	3.63636
Nutf2	5.27778	3.16667	3.83333	3.09091
Elavl2	5.27778	2.63333	16.7778	3.09091
Emc10	5.27778	2.3	2.55556	1.72727
Pdzd8	5.27778	1.86667	1.72222	11.9091
Rnf20	5.27778	1.86667	3.22222	2.18182
Tbc1d23	5.27778	1.56667	3.33333	1.63636
Gpcpd1	5.27778	1.53333	1.16667	2.36364
Immt	5.25	19.8333	6.77778	6.54545
Chchd6	5.25	18.6333	14.3889	4.18182
Csde1	5.25	16.5333	1.61111	3.18182
Dlst	5.25	8.46667	4.55556	6.45455
Bnip3l	5.25	5.46667	11	3
Sc5d	5.25	4.86667	4.83333	3.45455
Agap3	5.25	4.06667	5.77778	3.18182
Synj1	5.25	3.86667	10.2778	17.9091
Polr2j	5.25	3.03333	3.11111	4.27273
Sacs	5.25	2.66667	1.72222	2.27273
Ube2h	5.25	2.36667	1.66667	1.72727
Mrpl57	5.25	2.33333	10.1111	3.45455
Csnk2b	5.22222	6.43333	1.83333	2.54545
Psmc1	5.22222	5.8	5.83333	3.45455
Iah1	5.22222	5.2	1.33333	1.63636
Ube2j1	5.22222	4.06667	20.7778	2
Atp6v0b	5.22222	3.86667	8.61111	9.18182
Itm2b-Rb1	5.22222	3.23333	4.77778	3.72727
Srrm1	5.22222	3.13333	2.22222	3.09091
Hint2	5.22222	1.86667	4.77778	6.81818
Fgf11	5.19444	3.8	1.33333	1.63636
Selenoh	5.19444	3.76667	3.88889	4.54545
Ric8a	5.19444	3.33333	1.38889	1.63636
Cnot6l	5.19444	1.43333	1.33333	1.54545
Prkcz	5.16667	6.36667	21.4444	5.27273
Kcnc2	5.16667	6.2	2.05556	2.63636
Tmem65	5.16667	5.63333	5	2.27273
Nap1l3	5.16667	3.83333	1.77778	2.36364
Borcs8	5.16667	2.93333	1.38889	2.45455
Sorbs1	5.16667	2.4	6.22222	16.1818
Ntm	5.16667	2.2	5.05556	2.54545
Gpr22	5.16667	2.13333	2.94444	2.45455
Grik1	5.16667	2	4.94444	3.72727
Mrpl16	5.16667	1.96667	4.94444	1.90909
Poglut1-Timmdc1	5.16667	1.56667	4	1.63636
Tln2	5.16667	1.56667	3.61111	1.63636
Ndufa12	5.13889	6.66667	6.77778	2.18182
Xkr6	5.13889	6.06667	15.7778	2.54545
Efr3a	5.13889	5.13333	1.66667	2.18182
Vapa	5.13889	4.8	9.72222	2.54545
Myo9a	5.13889	3.86667	4.16667	6.27273
Pdgfa	5.13889	2.16667	2.05556	2.45455
Rapgef1	5.13889	2.06667	1.44444	4.90909
Lrch1	5.13889	1.2	1	1
Epc1	5.11111	9.46667	1.33333	1.63636
Lysmd4	5.11111	3.56667	2.27778	1.81818
Pmpcb	5.11111	1.83333	1.83333	1.72727
Tmem126b-Dlg2	5.11111	1.63333	3.77778	1.63636
Clec16a	5.11111	1.6	2.55556	2.09091
Top1mt	5.11111	1	1	9.45455
Aplp1	5.08333	8.66667	5.38889	4
Mef2a	5.08333	6.86667	20.4444	3.45455
Ngrn	5.08333	6.16667	2.61111	3.18182
Znhit6	5.08333	2.06667	1.66667	2.18182
AABR07048600.1	5.08333	1.06667	1.16667	1
Lrrc73	5.05556	16.6667	9.77778	1.63636
Sh3glb1	5.05556	7.1	1.33333	1.63636
Macf1	5.05556	6.6	7.77778	3.63636
Cnot4	5.05556	6.33333	3.77778	2.45455
Tspan13	5.05556	5.83333	4.83333	6.18182
Abcd3	5.05556	4.93333	10.5	3.72727
Trappc1	5.05556	3.7	24.5556	2.90909
Ogdhl	5.05556	3.03333	3.55556	1.63636
Polr2g	5.05556	2.66667	6.22222	2.45455
H2afy	5.05556	2.16667	6.61111	2.18182
Snx6	5.05556	1.93333	8.38889	1.90909
9930021J03Rik	5.05556	1.66667	13.8889	1.63636
Aar2	5.05556	1.1	1.72222	1.18182
Jpt1	5.02778	12.9	8.16667	13.5455
Cct4	5.02778	12.3333	2.22222	3.09091
6430548M08Rik	5.02778	8.9	14.6111	3.09091
Rfesd	5.02778	6.76667	3.88889	1.63636
Cep170b	5.02778	6	4.22222	43.5455
Mrpl14	5.02778	4.8	2.88889	15.9091
Zyg11b	5.02778	3.6	5.11111	19.4545
Gria4	5.02778	3.4	8.22222	65.5455
Dcaf12l1	5.02778	3.06667	2.44444	1.63636
Gmeb1	5.02778	1.4	1.22222	1.54545
Spcs2	5	15.1	3.61111	4.90909
Cx3cl1	5	5.36667	13	25.6364
Mkln1	5	5.1	2.27778	3.45455
Adarb1	5	2.4	3.22222	40.0909
Ehd3	5	2.3	1.44444	2.54545
Mrpl13	5	2.23333	1.66667	1.63636
Cnot7	5	2.1	2.33333	1.63636
Actr6	5	1.83333	3.16667	1.63636
Nsmce1	5	1.03333	1	1.09091
Pde5a	5	1	1	1
Psma1	4.97222	9.7	3.5	5
Ccng1	4.97222	8.16667	2.44444	12.3636
Pde4d	4.97222	4.83333	2.27778	2.54545
Zfp365	4.97222	3.86667	1.33333	2.81818
Cyb5r3	4.97222	3.13333	3.61111	6
Spock1	4.97222	2.9	2.16667	5.27273
Stx12	4.97222	2.36667	2.05556	2.72727
Pls3	4.97222	2.03333	3.22222	3.54545
Tmem199	4.97222	1.56667	8.38889	1.63636
Cep76	4.97222	1	1	1
Smarca2	4.94444	7.66667	3.61111	4.18182
Cpsf7	4.94444	3.63333	1.66667	1.63636
Mrps18c	4.94444	2.8	6.55556	2.27273
Klhl7-LOC100364673	4.94444	1.56667	1.38889	1.63636
Mapk8ip2	4.94444	38.0667	1.83333	2.54545
Mmd	4.94444	12.7333	10.6111	6.90909
Suclg1	4.94444	11.1667	2.94444	3.36364
Cyp51	4.94444	8.93333	5.83333	3.72727
Crebbp	4.94444	6.43333	10.9444	3.09091
LOC100909912	4.94444	5.1	4.22222	1.54545
Sdhb	4.94444	4.13333	20.1111	3.45455
Nktr	4.94444	2.76667	2.55556	3.18182
MetazoaSRP-250941	4.94444	2	2.88889	5.09091
Agfg1	4.94444	1.83333	3.38889	2.90909
Fnbp1l	4.91667	6.3	18.8889	3.63636
Snrnp70	4.91667	6.1	2.88889	13.4545
Taok3	4.91667	4.9	1.72222	2.27273
Socs5	4.91667	4.03333	10.7778	2.18182
Scn1b	4.91667	2.7	1.55556	1.81818
Dnajb6	4.91667	2.5	5.33333	2.54545
Ptdss1	4.91667	1.93333	2.05556	2.27273
Senp2	4.91667	1.56667	1.33333	1.63636
Luzp1	4.91667	1.56667	1.33333	1.63636
Tbl1xr1	4.91667	1.4	1.16667	1.54545
Spag9	4.88889	19.5667	5.44444	3.18182
Plekhb2	4.88889	4.3	5.77778	14.6364
Coil	4.88889	2.8	1.33333	1.54545
Nup98	4.88889	1.43333	8.55556	1.54545
Snrnp25	4.88889	1.06667	1	1
Ppib	4.86111	7.83333	3.72222	24.7273
Upf2	4.86111	5.66667	4.33333	12.7273
Nrep	4.86111	5.36667	1.16667	1.54545
Anks1b	4.86111	4.93333	1.61111	15.0909
Fdps-122886	4.86111	4.1	3.88889	7.54545
Hectd1	4.86111	2.46667	8	8.18182
Ercc6l2	4.86111	1.9	1.33333	1.63636
Zfp292	4.86111	1.9	2	2.27273
Smyd2	4.86111	1.86667	1.88889	2.27273
Vnn3	4.86111	1.46667	4.05556	8.81818
Paip2	4.83333	10.6	7.88889	5.36364
Btbd1	4.83333	8.8	9.5	23.0909
Tubb4b	4.83333	7.63333	5.72222	11.1818
Atxn10	4.83333	6.16667	13.8889	4.18182
Chga	4.83333	3.13333	4.33333	3.63636
Dctn2	4.83333	3.03333	9.11111	14.4545
Dlgap3	4.83333	2.3	2.27778	1.63636
Ccdc85a	4.83333	2.23333	1.77778	2.45455
Iars	4.83333	1.93333	6.5	2.18182
Zmym4	4.83333	1.86667	1.66667	2.27273
Zgrf1	4.83333	1.1	1	1.36364
Morf4l2	4.80556	27.3667	7.5	21.2727
Sumo1	4.80556	18.4667	14.3333	8.90909
Dnm3	4.80556	10.3	2.11111	2.54545
Reps2	4.80556	6.3	1.44444	1.90909
Fgf13	4.80556	4.23333	6.22222	27.9091
Phf20	4.80556	2	1.77778	2.36364
Bdh1	4.80556	6	1.94444	2.27273
Ankrd17	4.80556	5.16667	2.61111	3.63636
Crat	4.80556	2.26667	3.33333	1.63636
Afg3l2	4.80556	2.2	5.83333	2.54545
Lonrf2	4.77778	9.4	3.72222	4.09091
Ppia	4.77778	3.8	6.61111	6.72727
Epyc	4.77778	3.26667	1	1
Arl6ip1	4.77778	3.2	2.38889	4.09091
AABR07033829.1	4.77778	2.8	4.66667	3
Usp32	4.77778	2.23333	10.6667	2.45455
Wscd1	4.77778	1.43333	1.55556	1.54545
Med16	4.77778	1	1	1
Adipor1	4.75	7	2.27778	2.72727
Acsl4	4.75	5.33333	2.38889	53.1818
Rrbp1	4.75	4.03333	2.05556	2.54545
Tmem35a	4.75	3.76667	2.55556	10
Gcsh	4.75	3.1	1.5	1.63636
Hmg20a	4.75	3.03333	2.77778	3.18182
Thsd7a	4.75	2.96667	3.55556	2.45455
Malsu1	4.75	2.63333	1.44444	1.90909
Sirt6	4.75	2.63333	1.16667	1.54545
Vcpip1	4.75	2.53333	1.44444	2
Acyp1	4.75	1.93333	1.33333	1.63636
Pnrc2	4.75	1.83333	1.38889	1.63636
Gfod1	4.75	1.8	8.38889	2
Bcl7b	4.75	1.56667	1.33333	1.63636
Phc3	4.75	1.4	6.22222	1.54545
Zfp560	4.75	1.4	10.6667	1.54545
Map7d2	4.72222	9.93333	29.4444	6.81818
Traf3	4.72222	9.46667	16.2778	2.36364
Amd1	4.72222	5.16667	6.38889	3.09091
Tmf1	4.72222	4.86667	5.55556	2.36364
Lrrc4c	4.72222	4.8	5.22222	2.54545
Aars	4.72222	4.76667	13.0556	8.45455
Samm50	4.72222	4.06667	1.77778	2.27273
Fgd4	4.72222	3.36667	1.44444	3.36364
Tenm2	4.72222	3.1	2	2.54545
Lnx1	4.72222	2.63333	5.5	1.63636
Chmp1a	4.72222	2.6	3.77778	1.63636
Ndufaf7	4.72222	2.3	2	1.63636
Sfxn1	4.72222	2.06667	8.05556	1.90909
Lgr4	4.72222	2.06667	1.16667	1.54545
Pafah1b3	4.72222	1.8	10.3333	1.63636
Zfp280d	4.72222	1.76667	1.77778	2
Coro1c	4.72222	1.56667	5.11111	1.63636
Atg13	4.72222	1.43333	1.33333	1.54545
Deptor	4.69444	1.2	1.77778	1.45455
Epm2aip1	4.69444	26.7667	5	3.18182
Pam16	4.69444	14.6333	7	2.90909
Cfdp1	4.69444	10.9667	7.22222	20.6364
Taldo1	4.69444	5.96667	15.1667	2.63636
Clip1	4.69444	5.5	1.77778	2.45455
Pnn	4.69444	3.33333	9.27778	3.63636
Dmxl2	4.69444	3.23333	5.66667	2.90909
Tmbim6	4.69444	2.5	2.22222	2.90909
Tnfaip1	4.69444	2.06667	3.66667	1.54545
Hapln4	4.69444	1.43333	1.16667	1.54545
Ccdc107	4.66667	17.5	1.83333	10
Cyp3a2-Arpc1a	4.66667	13.9	4.22222	3.54545
Kcnq3	4.66667	10.1667	9.72222	3.09091
Samd4b	4.66667	6.96667	1.61111	1.63636
Rpl26	4.66667	4.7	7.77778	2.36364
Cit	4.66667	4.23333	6.77778	11.2727
Hsd17b12	4.66667	3.26667	14.5	3.27273
Eea1	4.66667	2.96667	11.1111	3.27273
Yaf2	4.66667	2.76667	11	3.90909
Fam92a	4.66667	2.1	8.5	2.45455
Tmem47	4.66667	2	2.05556	5.27273
Psd	4.66667	1.93333	1.33333	1.54545
Mrpl41	4.66667	1.7	3.94444	1.63636
Kars	4.66667	1.63333	1.44444	5.27273
Ndufaf1	4.66667	1.23333	1.33333	1.45455
Emp1	4.66667	1	1	1
H3f3b	4.63889	18.6	12.9444	3.18182
Chd5	4.63889	11.7333	9.94444	3.63636
Ids	4.63889	9.26667	3.61111	13.9091
Celf4	4.63889	8.33333	17.5556	5.18182
Atp6ap1	4.63889	8.16667	9.88889	8.54545
Samd12	4.63889	7.4	3.83333	7.18182
Hspa4	4.63889	5.1	7.27778	2.90909
Dock3	4.63889	4.6	6.27778	2.72727
Slc1a1	4.63889	3.2	2.94444	2.45455
Rnf5-C4a-Stk19	4.63889	2.8	18.4444	3.36364
Sar1a	4.63889	2.7	1.83333	2.45455
Nlgn3	4.63889	2.56667	2	3.72727
Coasy	4.63889	2.33333	1.33333	1.54545
Ik	4.63889	1.86667	2.05556	8.09091
Egln2	4.63889	1.86667	5.72222	1.54545
Rnf157	4.63889	1.6	3.5	1.72727
Suco	4.63889	1.56667	1.38889	1.63636
Fkbp8	4.61111	12.1333	8.11111	8
Hikeshi	4.61111	8.2	1.94444	1.72727
Rbm4b	4.61111	7.93333	1.77778	2.36364
Zdbf2	4.61111	7.83333	9.11111	2.27273
Pcbp2	4.61111	4.2	2.05556	2.45455
Mrpl27	4.61111	3.8	5.11111	2.63636
Clstn1	4.61111	3.53333	2.72222	11.0909
Selenoi	4.61111	3.26667	12.8889	2.54545
Ube2q1	4.61111	3.13333	4.94444	1.63636
Ostc	4.61111	2.56667	8.94444	2.90909
Stox2-AABR07025757.1	4.61111	2.06667	7.88889	2.36364
Slc9a7	4.61111	1.9	8.61111	10.7273
Grik5	4.61111	1.76667	2.38889	3.45455
Sesn2	4.61111	1.6	1.66667	1.63636
Usp42	4.61111	1.43333	1.33333	1.54545
Fancm	4.58333	9.96667	4.61111	1.72727
Arf4	4.58333	5.66667	3.16667	3.09091
GL.23444	4.58333	4.96667	1.33333	1.63636
Wdr74	4.58333	3.6	1.16667	1.54545
Orc4	4.58333	1.6	1.44444	1.72727
Clk4	4.58333	1.56667	1.33333	1.63636
1700025G04Rik	4.58333	1.56667	1.33333	2.45455
Jph4	4.58333	1.43333	1.83333	3.18182
Phf21a	4.58333	1.4	1.16667	1.54545
Gid4	4.58333	1.3	1.27778	1.45455
Cacybp	4.55556	10.5333	9.83333	11.5455
Arfgef1	4.55556	6.46667	2.38889	3.54545
2020-09-05	4.55556	3.6	4.05556	5.36364
Ago1	4.55556	3.43333	3.77778	1.63636
GL.14817-GL.18196	4.55556	3.4	1.83333	6.81818
Dnajc27	4.55556	2.76667	6.94444	1.63636
Me1	4.55556	2.56667	1.33333	1.45455
AABR07021988.1	4.55556	2.2	3.94444	2.54545
Cdo1	4.55556	2.1	4.27778	2.63636
Clptm1l	4.55556	1.83333	16.3889	10.2727
Naa16	4.55556	1.36667	1.16667	1.54545
Mccc1	4.55556	1	1	1
Tnrc6b	4.52778	18.9333	2.22222	4.63636
Syn2	4.52778	12.5667	9.66667	5.09091
Map2k2	4.52778	11	15.5556	5.90909
Tpd52	4.52778	9.1	1.33333	1.54545
Fastk	4.52778	6.16667	2.66667	1.63636
Bcl2l2	4.52778	4.1	1.38889	1.63636
Srsf2	4.52778	2.7	26.6111	3
Kti12-Txndc12	4.52778	2.56667	1.33333	1.63636
Bmyc	4.52778	2.43333	2.5	3.18182
Ddit3	4.52778	1.93333	2.11111	2.27273
Fchsd2-Olr51	4.52778	1.73333	2.16667	1.63636
Mlx	4.52778	1.6	2.72222	4.72727
Rpl5	4.5	5.83333	1.44444	1.72727
Ptges3	4.5	3.6	7.05556	2.63636
Wdr37	4.5	3.13333	2.11111	7.90909
Coa6	4.5	3.03333	7.94444	2.18182
Fryl	4.5	2.96667	8.77778	2.45455
Rab21	4.5	2.63333	1.44444	1.72727
Kcna6	4.5	2.6	1.33333	1.63636
AABR07041096.1	4.5	2.6	1.66667	4
Zmat2	4.5	2.43333	1.44444	3
Appl1	4.5	2.36667	14.2778	2.72727
Hspa12a	4.5	2.2	2.22222	2.54545
Phax	4.5	1.96667	7.61111	2.63636
Zfyve9	4.5	1.56667	1.33333	3.63636
Enox2	4.5	1	1.05556	1
Commd6	4.47222	14.7	1.66667	2.27273
Capza2	4.47222	8.96667	4.11111	3.27273
Pak1	4.47222	8.33333	10.7778	4
Dync1i2	4.47222	5.76667	6.66667	10.2727
Grina	4.47222	4.66667	9.94444	3.63636
Ggnbp2	4.47222	4.5	11	3.09091
Mir384	4.47222	3.33333	2.66667	3.90909
Kdm4c	4.47222	3	1	1
Rpp30	4.47222	2.33333	1.33333	1.63636
Gch1	4.47222	2.1	1.33333	1.54545
Wrb	4.47222	2.06667	6.5	5.63636
Slit3	4.47222	1.46667	3.44444	1.54545
Gzf1	4.47222	1.03333	1	1.09091
Tnfaip8l3	4.44444	1.03333	2.55556	1.18182
Commd1	4.44444	6.23333	2.33333	2.45455
Mrm3	4.44444	2.86667	1.05556	2.63636
Rbm18	4.44444	2.6	1.44444	2.90909
Lrrc8b	4.44444	2	5.94444	5.36364
Mroh1	4.44444	1.76667	1.61111	2.18182
Gosr2	4.44444	1.6	1.33333	1.63636
Slc48a1	4.44444	1.6	1.44444	1.72727
Becn1	4.41667	24.6333	3.94444	5.90909
Nxph1	4.41667	5.46667	2.16667	2.81818
Kif3c	4.41667	4.76667	3.88889	2.45455
Dnaja2	4.41667	3.73333	3.83333	3.63636
Slc6a15	4.41667	3.6	2.33333	1.63636
Itfg1	4.41667	2.46667	2.16667	2.90909
Asb8	4.41667	2.46667	1.44444	3
Tmem14c	4.41667	2.33333	2.88889	2.27273
Herc3	4.41667	2.26667	1.5	1.63636
Ppm1g	4.41667	1.7	1.44444	2
Prim1	4.41667	1.5	2.27778	1.63636
Fbxo45	4.41667	1.23333	1	1.18182
Tpr	4.38889	7.26667	10.7222	3.63636
Psmd1	4.38889	5.33333	3.5	3.27273
Dstn	4.38889	4.73333	3.88889	3.09091
Iqsec3	4.38889	4.2	18.9444	4.72727
Psme1	4.38889	2.93333	1.38889	1.63636
Grk6	4.38889	2.33333	1.44444	1.72727
Sh3bgrl	4.38889	2.23333	29.5556	2.45455
Snx11	4.38889	2.03333	4	1.09091
Prkcsh	4.38889	2.03333	2.72222	2.63636
Gps2	4.38889	1.2	1.33333	3.54545
Pcnx2	4.38889	1.2	1.38889	1.36364
Ap1s2	4.36111	13.7	1.72222	1.90909
Actr3	4.36111	7.86667	6	2.63636
Chrna7	4.36111	7.66667	2.55556	2.18182
Smc6	4.36111	7.2	7.94444	2.90909
Ccdc28b	4.36111	6.5	9.16667	1.63636
AABR07005779.2	4.36111	5.5	1.05556	1
Rps17	4.36111	4.26667	3.83333	1.81818
Gabrb3	4.36111	3.8	10.9444	5.90909
Ubap2	4.36111	3.6	12.0556	6.09091
Palm2	4.36111	3.6	13.2778	3.63636
Tnpo2	4.36111	3.2	5.44444	5.72727
Mrps36	4.36111	3	8.38889	3
Tmem9b	4.36111	2.63333	1.83333	2.54545
Ccdc127	4.36111	2.6	1.77778	2.27273
Ube2g1	4.36111	2.4	1.38889	2.18182
Ctss	4.36111	1	1	1
Pitpnm1	4.33333	18.0667	3	1.81818
Scg5	4.33333	11.3	22.3333	12.3636
Dync1li1	4.33333	7.6	2.38889	3.54545
Ash1l	4.33333	5.53333	12.7222	3.18182
Zdhhc5	4.33333	5.5	2.33333	2.45455
Supt16h	4.33333	4.2	2.05556	31.4545
Dnm1	4.33333	2.63333	2.33333	3.27273
Nap1l4	4.33333	2.46667	2.88889	16.7273
Msrb1	4.33333	2.33333	1.44444	3.54545
Cck	4.33333	2.23333	14.7778	1.63636
Ctps1	4.33333	2.03333	2	1.63636
Fbh1	4.33333	1.56667	1.61111	1.63636
Snx13	4.33333	1.56667	1.33333	1.63636
Cep290	4.30556	12.7667	1.88889	2.27273
Cct8	4.30556	4.36667	4.44444	3.72727
Timp2	4.30556	3.8	2.61111	8.09091
Plekho1	4.30556	3.4	5.55556	2.27273
Arl3	4.30556	2.96667	8.44444	28.7273
Slc25a39	4.30556	2.83333	8.16667	5.54545
Jak1	4.30556	2.83333	2.05556	2.63636
Eloc	4.30556	1.86667	2.66667	2.54545
Tiam1	4.30556	1.6	1.94444	1.63636
Atl1	4.30556	2.3	2.94444	2.90909
Ube3a	4.27778	11.8667	6.5	4.18182
Atp6ap2	4.27778	6.13333	4.61111	4.09091
Bod1l1	4.27778	4.9	9.77778	8.81818
Psmc2	4.27778	3.2	2.05556	4
Clcn3	4.27778	3.13333	8.05556	2.72727
Nptn	4.27778	3.06667	2.72222	4.54545
C1qtnf4	4.27778	2.73333	2.94444	2.63636
Ap3b2	4.27778	2.46667	2.16667	3.18182
Psmb2	4.27778	2.46667	7.22222	2.90909
Ppm1a	4.27778	1.86667	2.83333	3
Polr2e	4.27778	1.56667	1.33333	5.27273
Plcg1	4.27778	1.5	1.33333	1.63636
Lrp12	4.27778	1.36667	1.16667	1.54545
Zscan4f	4.27778	1	1	1
Psip1	4.25	8.36667	3	8.54545
Ptpn1	4.25	5.63333	1.77778	2.45455
Klhl11	4.25	4.63333	2.44444	7.36364
Ckap5	4.25	3.13333	4.44444	2.90909
Ubxn4	4.25	3.03333	2.38889	3.54545
Cdc37	4.25	2.8	7.11111	2.27273
Map3k9	4.25	2.76667	2.61111	1.63636
Dpysl4	4.25	2.33333	1.77778	14.7273
Wdfy3	4.25	2.16667	4.33333	1.72727
Eif1ad	4.25	2.13333	2.72222	11.6364
Prdx6	4.25	1.86667	2.05556	1.63636
Dlg4	4.25	1.66667	2.55556	3.27273
Arhgap23	4.25	1.43333	1.33333	1.54545
Insyn1	4.25	1.4	5.38889	2.81818
Pla2g6	4.25	1.13333	2.61111	1
Lox	4.25	1	1	1
Mxd1	4.25	1	1	1
Ddah1	4.22222	21	6.16667	26.6364
Mocs2	4.22222	11.9333	1.44444	1.63636
Mrpl15	4.22222	6.46667	14	4
Kif21a	4.22222	5.7	7.94444	3.81818
Lrp11	4.22222	5.13333	1.77778	2.45455
Adnp	4.22222	2.86667	1.77778	2.36364
BC003965	4.22222	2.73333	3.27778	1.63636
Trim37	4.22222	2.2	10.4444	6.90909
Lmtk2	4.22222	2.03333	1.33333	1.63636
Usp7	4.22222	1.93333	3.05556	2.63636
Eif3l	4.22222	1.83333	1.66667	2.27273
Snrnp35	4.22222	1.8	18.6667	11.1818
Stam	4.22222	1.63333	1.66667	1.63636
Wbp1l	4.22222	1.56667	3	1.63636
Casp9	4.22222	1.03333	1	1.09091
Sltm	4.19444	27.1	2.27778	3.27273
Slc3a1	4.19444	8.33333	8.44444	14.3636
Ttbk1	4.19444	7.03333	1.55556	6.90909
Ndufb4	4.19444	6.73333	7.94444	2.54545
Zc3h7b	4.19444	5.36667	5.22222	1.63636
Pde4dip	4.19444	4.43333	3.11111	2.81818
Zfp318	4.19444	3.6	20.6111	2.45455
Mrpl28	4.19444	3.46667	3.16667	2.45455
Cebpzos	4.19444	3.1	3.33333	5.18182
Rgs4	4.19444	2.1	1.77778	10.5455
Usp15	4.19444	2	4.16667	8
Asb1	4.19444	2	1.44444	1.63636
Cmc2	4.19444	1.93333	1.44444	3.90909
Timm44	4.19444	1.6	3.38889	1.72727
Abcb10	4.19444	1.6	9.83333	1.63636
Esrrg	4.19444	1.56667	1.38889	1.63636
Tob1	4.19444	1.2	2.16667	11.9091
Senp6	4.16667	16	5.16667	4.81818
H2afz	4.16667	8.7	2.16667	4.18182
Agpat3	4.16667	3.53333	1.44444	1.72727
Ryr3	4.16667	2.2	2.05556	2.54545
Rbms3	4.16667	2.16667	1.38889	1.63636
Tmem179	4.16667	2.13333	4.61111	2.63636
Riok3	4.16667	1.96667	1.77778	3.27273
Abi1	4.16667	1.9	7.11111	3.36364
Baz2a	4.13889	8.63333	1.33333	1.54545
Zc3h13	4.13889	8.13333	1.88889	13.3636
Hk1	4.13889	7	3.88889	14.0909
AC109096.1	4.13889	6.16667	3.05556	2.27273
Nipsnap2	4.13889	5.63333	10.8889	12.4545
Amer2	4.13889	4.63333	1.33333	1.54545
Jazf1	4.13889	3.26667	1.72222	4.36364
Prpf4b	4.13889	3.2	3.16667	3.72727
Eif4ebp3	4.13889	3.2	2.22222	5.27273
Dlgap4	4.13889	3.03333	14	2.27273
Ppa1	4.13889	2.63333	2.22222	4.90909
Srsf10	4.13889	2.36667	1.61111	7.18182
Psma2	4.13889	2.2	7.44444	2.54545
Fam126a	4.13889	2.1	1.11111	1.45455
Nectin1	4.13889	2.1	8.27778	2.27273
Tvp23a	4.13889	1.96667	1.11111	1.45455
Szrd1-Necap2	4.13889	1.76667	1.11111	1.45455
Psmd9	4.13889	1.56667	1.72222	1.63636
Plcb4	4.13889	1.56667	1.33333	1.63636
Nubp1	4.13889	1.36667	1.16667	1.54545
Klhl20	4.13889	1.36667	1.16667	1.54545
Rarb	4.13889	1	1	1
Ptgr2	4.13889	1	1	1
Man1a2	4.11111	23.6333	1.44444	2.36364
Erc1	4.11111	7.76667	5.88889	19.4545
Herc1	4.11111	7.13333	3.55556	3.63636
Clstn2	4.11111	7.1	5.33333	3
Laptm4a	4.11111	6.53333	2.05556	2.72727
Sf3b1	4.11111	5.06667	10.9444	3.72727
Scn1a	4.11111	3.5	2.27778	3.27273
Gfpt1	4.11111	3.46667	1.72222	2.27273
Ireb2	4.11111	2.4	3.05556	1.63636
Sephs2	4.11111	2.16667	1.44444	1.72727
Srsf3	4.11111	2.06667	1.77778	2.36364
Tmem97	4.11111	1.4	1.22222	1.54545
Pik3r3	4.11111	1.4	1.33333	1.54545
Alg3	4.11111	1.33333	1	1
Mmp24	4.11111	1.3	1.16667	1.45455
Tnfrsf12a	4.11111	1.03333	1	1.09091
Ppp1ca	4.08333	11.1	5.22222	19.0909
Alkbh7	4.08333	8.86667	6.72222	2.54545
Mcf2l	4.08333	7.96667	4.83333	1.63636
Fmc1	4.08333	6.46667	2.16667	2.81818
Fam49b	4.08333	5.5	3.11111	2.45455
Adgrl1	4.08333	5.33333	20.7778	4.54545
Mrps18b	4.08333	5.3	1.44444	1.90909
Dynlt1	4.08333	5.03333	3.61111	2.63636
Chl1	4.08333	4.66667	6	13.6364
Nrdc	4.08333	4.6	2.44444	20.3636
Snf8	4.08333	3.66667	3.88889	4.09091
Sfr1	4.08333	3.46667	2	22.2727
Capzb	4.08333	3.43333	4.38889	2.18182
LOC108350834	4.08333	3.16667	1.11111	1.45455
Atxn7l3	4.08333	2.93333	3.05556	2.18182
Rnf208	4.08333	2.36667	8.05556	2
Tmbim4	4.08333	2.26667	2.33333	2.27273
AABR07027212.1	4.08333	1.9	3.38889	1.63636
Zfp131	4.08333	1.9	1.66667	2.18182
Tmem50a	4.08333	1.56667	6.88889	3.54545
Spata1	4.08333	1	1	1
Mest	4.05556	15.2	2.33333	4.27273
Nkiras1	4.05556	5.2	2.55556	10.1818
Gng10	4.05556	2.83333	5	15.7273
Ero1a	4.05556	2.76667	1.44444	1.72727
Elavl4	4.05556	2.66667	7.33333	2.54545
Ncam2	4.05556	2.46667	4.27778	2.81818
Ergic3	4.05556	1.76667	1.61111	2.18182
Ppp1r1a	4.05556	1.66667	6.77778	1.63636
Dot1l	4.05556	1.63333	3.33333	1.63636
Nsun5	4.05556	1	1	1
Rbfa	4.05556	1	1.11111	1
Myh15	4.05556	1.66667	1	1
Ints11	4.05556	1.36667	1.16667	1.54545
AABR07013410.1	4.05556	1.26667	1	1.63636
Cnot11	4.05556	1	1	1
Daam1	4.02778	11.2	11.8333	4.09091
Gpi	4.02778	7.6	18.5556	25.2727
Psmg3	4.02778	6.3	17.5556	2.27273
Ago2	4.02778	5.46667	3.38889	8
Fktn	4.02778	5.33333	1.44444	1.63636
Rpl27	4.02778	5.3	11.2778	6.27273
Nudt2	4.02778	5.3	1.72222	3.36364
Idh3g	4.02778	5.16667	3.77778	3.72727
Zcchc7	4.02778	2.63333	2.22222	60.9091
Dhcr24	4.02778	2.33333	10.5	2.36364
Pdhx	4.02778	2.1	1.77778	2.45455
Adh5-121220	4.02778	1.8	5.22222	1.63636
Camta1	4.02778	1.03333	1	1
Maged2	4	16.2667	1.44444	1.90909
Mapk1	4	11.5333	11.8333	3.09091
Nacc2	4	10.1333	7.44444	1.90909
Fis1	4	8.56667	5.88889	2.45455
Ndufv3-148199	4	7.23333	19.3333	22.7273
Slc7a14	4	4.66667	2.16667	3.36364
Id2	4	3.6	14.1667	5.63636
Gabarap	4	3.53333	6.55556	2.36364
LOC100360846-Psmb6	4	3.26667	3.22222	2.09091
Enc1	4	3.23333	1.33333	4.45455
Top1	4	2.96667	3.72222	19.8182
Ctsa	4	2.13333	1.83333	2.45455
Zbtb38	4	1.6	1.33333	1.63636
Dstyk	4	1.56667	1.77778	3.81818
Acsl1	4	1.56667	5.5	1.63636
Mapk4	4	1.5	1.16667	3.90909
Rnd3	4	1.03333	1.66667	1.09091
Triqk	4	1	1	1
Rpl27a-002131	3.97222	8.7	6.72222	2.27273
Crk	3.97222	7.5	2	2.45455
Usp34	3.97222	7.36667	6.61111	7.09091
Vgf	3.97222	5.7	2.27778	7.72727
Ctrl-Psmb10	3.97222	5.53333	2.88889	1.63636
Nolc1	3.97222	4.93333	1.77778	35.4545
Tcea2	3.97222	4.43333	2.83333	1.63636
Gtf2i	3.97222	2.2	1.88889	2.54545
Zrsr1	3.97222	2	1.77778	4.45455
Nyap2	3.97222	1.96667	3	1.63636
Babam1	3.97222	1.56667	4.5	1.90909
Irak1bp1	3.97222	1.56667	1.33333	1.54545
Zfp608	3.97222	1.53333	1.61111	1.45455
Ppp6r3	3.97222	1.43333	2.77778	1.54545
Sipa1l2	3.97222	1.4	1.33333	1.54545
Tent4b	3.97222	1.03333	2.72222	1.09091
Tbc1d10a	3.97222	1	1	1
Zzef1	3.94444	8.13333	4.11111	4.45455
Cbx5	3.94444	18.9333	6.27778	3.36364
Eno1	3.94444	6.96667	11.1667	6.72727
Snhg4	3.94444	3.56667	3.88889	1.63636
Rpl10a-148169	3.94444	3.56667	2.66667	4
Ilf2	3.94444	2.76667	2.44444	3.18182
Eef1d	3.94444	2.56667	2.66667	2.27273
Ube2d1	3.94444	1.86667	2.77778	2.45455
Osbp	3.94444	1.7	4.05556	1.63636
Mypop	3.94444	1.03333	1	1.09091
Cdk5r1-Rnf135	3.91667	29.6	3.16667	12.1818
Ddb1	3.91667	11.2333	1.88889	2.36364
Snap91	3.91667	8	7.22222	3.63636
Golga7b	3.91667	6.16667	1.38889	1.63636
Ercc8	3.91667	5.2	1.66667	3.09091
Klf6	3.91667	4.86667	1.83333	2.54545
Taok2	3.91667	3.93333	2.16667	2
Cops3	3.91667	3.7	3.55556	2.45455
LOC103690166	3.91667	2.73333	4.11111	2.72727
Timm17a	3.91667	2.7	7.27778	2.81818
Pak6	3.91667	2.4	1.33333	2.36364
Aak1	3.91667	2.4	2.33333	2.90909
Mkrn1	3.91667	2.3	1.66667	2.36364
Vstm2a	3.91667	2.26667	12.7222	2.63636
Cul4b-C1galt1c1	3.91667	1.73333	1.44444	1.72727
BC004004	3.91667	1.56667	1.38889	1.63636
Gabrg1	3.91667	1.4	1.16667	1.54545
Ccnd2	3.88889	7.83333	1.83333	7
Sqle	3.88889	6.63333	9.77778	36
Cox16	3.88889	4.3	7.44444	2.18182
Rbbp7	3.88889	2.83333	5.5	3.36364
Ciao2b	3.88889	2.33333	8.11111	11.1818
Opa3	3.88889	2.13333	1.33333	1.54545
Ptpn5	3.88889	2.1	1.83333	7.54545
Rbm14-Rbm4	3.88889	2.03333	1.61111	2.09091
3830406C13Rik	3.88889	1.93333	2.16667	8.27273
Vmp1	3.88889	1.73333	1.44444	1.90909
Ube3b	3.88889	1.66667	1.33333	1.54545
Mrpl22	3.88889	1.43333	1.33333	1.54545
Msantd3	3.88889	1.23333	1.11111	1.45455
Dcun1d5	3.86111	6.8	3.83333	7.54545
Hmgcr	3.86111	3.93333	2.72222	2.81818
Pip4k2b	3.86111	3.66667	4.05556	2.18182
Papola	3.86111	3.23333	3.05556	2.36364
Ndfip2	3.86111	2.26667	1.83333	4.18182
Arl2bp	3.86111	1.83333	2.88889	5.09091
Mycbp-Rragc	3.86111	1.6	1.44444	1.72727
Uck2	3.86111	1.43333	1.33333	1.54545
Zfp711	3.86111	1.03333	1	1.09091
AABR07002068.1	3.86111	1	1	1
Tet3	3.86111	1	1	1
Lepr	3.86111	1	1	20
Sdha	3.83333	6	24.7222	3.09091
Raph1	3.83333	4.86667	1.44444	1.72727
Mark4	3.83333	4.76667	1.94444	2
Tmem208	3.83333	4.33333	7.72222	2.63636
Tmx1	3.83333	3.76667	5.55556	6.63636
Ppfia2	3.83333	3.13333	2.88889	4.45455
Acsl3	3.83333	2.86667	3.83333	2.54545
Mrps7	3.83333	1.9	7	2.27273
1700037H04Rik	3.83333	1.9	3.05556	1.72727
Aasdhppt	3.83333	1.83333	6.77778	15.8182
Adpgk	3.83333	1.7	1.33333	1.63636
Wdr45	3.83333	1.66667	1.55556	1
Rnf103	3.83333	1.56667	1.33333	1.63636
Dab2ip	3.83333	1.5	1.16667	1.54545
Exoc8	3.83333	1.46667	1.33333	1.54545
Cwf19l1	3.83333	1.43333	1.33333	1.54545
Mtx3	3.83333	1.13333	1.05556	1.27273
Zfp35	3.83333	1	1	3.36364
Hdgf	3.80556	10.8667	3.27778	2.45455
Arl8a	3.80556	7.4	19.1111	2.72727
Ptprt	3.80556	7.3	1.61111	2.18182
AABR07043510.1	3.80556	6.46667	1	1
Fam216a	3.80556	5.63333	1.44444	1.72727
Epha5	3.80556	5.56667	6.22222	3.63636
Cep131	3.80556	5.33333	1.83333	1.54545
Emg1	3.80556	4.86667	2.38889	19
Tceal3	3.80556	4.76667	1.5	2.09091
Cwc15	3.80556	3.4	2.66667	2.36364
B230219D22Rik	3.80556	3	2.94444	14.2727
Rock1	3.80556	2.83333	2.27778	3.27273
Zfp512	3.80556	1.73333	5.94444	1.63636
[truncated: 12,844 more rows]

## Sheet: Somata
Gene_Name	GABAergic_1	GABAergic_2	GABAergic_3	Glutamatergic
Malat1	799.097	752.122	1238.89	1262.17
Meg3	612.408	531.11	690.923	689.253
Calm1	384.621	307.354	266.446	400.537
Atp1b1	235.301	173.707	244.923	163.842
Slc25a4	203.408	148.085	146.338	87.6737
Ndrg4	189.233	148.695	128.985	74.7684
Stmn3	177.631	131.476	105.892	52.7579
Hsp90ab1	170.33	189.622	174.985	152.2
Atp5f1b	163.204	121.72	101.662	60.4947
Map1b	159.32	172.841	147.954	143.8
Gad1	157.039	128.39	80.8	19.2842
Mdh1	157.01	110.5	74.4769	47.6105
Lgi2	153.796	81.7195	86.2615	18.1053
Ndufa4	149.194	114.768	89.9538	55.0421
Snhg11	147.408	120.012	175.846	76.7158
Atp5mc3	141	91.1341	75.1385	48.7579
Atp6v0c-Amdhd2	140	130.988	132.462	78.9053
Rtn1	136.883	190.512	183.677	138.021
Ldhb	126.272	96.8415	89.7077	26.0947
LOC252890-Cox7c	119.107	117.707	85.9077	75.7684
Scg2	117.971	80.3659	80.1692	80.0842
Gad2	117.087	177	178.738	9.07368
Pebp1	116.835	90.5244	92.8615	42.3895
Ttc3	110.117	129.524	127.015	142.558
Bcat1	107.913	82.6707	90.5385	36.8842
Slc25a3	106.165	71.0854	66.4	34.6316
Gnas-Gnas	103.806	104.744	141.769	100.358
Ywhab	102.932	99.1585	86.5846	59.9474
Cox6a1	101.68	97.8659	86.1846	51.0842
Lsamp	101.476	81.8537	76.2462	101.474
Pcdh17	101.417	31.1098	31.3692	46.3474
Cartpt	101.136	32.5244	44.9385	2.45263
Tcf4	99.5922	128.829	103.862	123.842
Tmem130	96.4369	107.671	107.062	86.3053
Gria2	96.3301	128.11	137.415	157.158
Ckb	95.068	58.2805	60.4462	40.4
Atp5me	94.767	104.366	76.5692	59.4842
Syt1	94.2136	88.7195	106.908	37.1368
Gpr88	92.932	28.2195	19.1385	2.95789
Calm2-207032	90.6699	92.0244	74.6	74.9684
Atp5mc1	90.6505	67.1098	53.5538	36.4105
Atp5f1d	89.5437	70.061	64.7231	45.1263
App	88.8738	72.9756	81.0308	94.5263
Map2	88.6408	79.8049	47.5692	87.1474
Cort	86.1553	6.59756	2.21538	3.52632
Nefl	85.699	66.622	75.2154	108.516
Atp5pf	85.0583	61.4756	54.3385	29.0737
Pnoc	84.6019	35.1098	19.8462	2.95789
Pcdh9	84.0874	52.9512	27.6769	61.1789
Snap25	83.5049	61.1951	52.9692	49.4105
Nefm	82.7767	75.1951	63.7846	73.6632
Bex2	82.4854	100.439	80.8923	85.2947
Prdx2	80.2524	65.1341	66.8308	27.6632
Zwint	80.1262	68.8049	83.3231	58.7053
Rgs2	79.7184	21.2805	9.21538	28.2632
Cox5b	78.6408	59	61.3692	38.5158
Gda	78.4369	45.1951	33.5231	25.3684
Cox6c	78.3301	70.2439	67.4154	52.9684
Stmn2	78.1068	141.159	94.5077	97.8316
Atp5mg	77.9029	63.3902	57.4154	44.3158
Rtn3	77	81.0854	76.9692	57.6526
Rnf139-Ndufb9	76.5049	66.2561	58.0462	27.8632
Uqcrh	74.6408	59.8293	60.7077	32.2526
Nap1l5	74.5825	63.5366	72.2615	9.55789
Fkbp3	72.7864	55.9878	75.6462	28.5368
Ndufb8	72.699	65.1098	56.9692	37.2211
Tcf25	72.2621	81.6585	67.7692	58.2105
Ndfip1	71.8252	65.061	79.5846	51.8737
Aldoa	71.4757	53.3537	63.2769	48.6316
Rab3a	70.0971	58.1707	40.6308	29.6632
Fabp5	70.0097	44.9634	46.3077	15.2737
Actb	69.7864	78.5122	56.1846	82.8737
Ndufa5	69.068	46.5976	39.9846	25.5474
Gria1	69	49.5244	30.3077	42.8105
Uqcrq	68.068	64.7317	53.7385	36.8316
Mpc2	67.3398	45.8049	32.9846	20.4737
Atp5po	66.3204	51.5732	53.9231	32.1368
Atp2b1	63.9709	91.8049	62.3846	126.221
Timm8b	63.6019	57.622	55.5692	36.8421
Uchl1	63.466	79.6585	56.9846	40.7474
Ina	63.2718	45.4878	32.1077	24.9158
Map1a	63.2718	54.3902	43.8308	62.4526
Sod1	62.2039	54.3659	49.3846	23.9474
Sv2a	61.4563	60.3293	62.6769	33.3263
Atp5f1e	61.1068	51.6707	41.5692	34.9158
Kif5c	60.8447	72.5488	83.2923	86.7263
Psma7	60.6893	57.5976	54.2154	45.2632
Atp5f1c-094163	60.2718	42.0366	42.1538	25.9684
Sst	59.699	25.9268	2.27692	2.68421
Pja2	59.6505	53.2805	48.7538	32.5263
Rian	58.8641	81.6951	84.6769	134.6
Cisd1	58.7379	53.1341	50.8	41.7895
Cplx1	58.6602	48.3537	40.4769	10.6947
Atp5pd	58.5534	43.0244	43.7538	30.8526
Sptbn1	58.165	53.5244	47.6923	73.5368
Uqcr10	57.3883	48.1585	32.9231	23.3684
Tspyl4	57.0194	67.6951	62.2923	32.8421
Sparcl1	56.7379	13.5366	38.2462	13.4211
Ndufab1	56.4563	43.378	38.4615	26.7895
Cpe	56.2427	56.8902	62	76.8947
Mef2c	55.8155	44.0488	24.1846	28.6947
Atxn7l3b	55.7961	56.5976	47.2308	33.2211
Reep5	55.534	62.5976	57.7538	20.1053
Atp6v1e1	55.2427	45.6951	41.3077	37.5474
Ywhag	55.1942	66.7805	52.5231	33.1579
Myl6	55.0971	64.4512	50.3077	44.5684
Slc6a1	54.9417	60.5244	68.3692	4.02105
Bsg	54.932	38.1829	34.4923	23.0842
Rnasek	54.9126	51.3659	54.4308	31.0421
Dnm1l	54.6214	46.3415	41.3077	32.4211
Sncb	54.4369	41.1707	42.4769	31.4316
Cox8a	54.3301	49.0122	54.4462	34.4947
Skp1	54.1553	52.2317	59.9692	40.0842
Ndufb7	54.0388	38.0854	39.1077	26.6421
Tspan3	53.3592	41.7195	51.8769	31.5368
Tubb2a	53.0291	60.2805	40.5692	40.4316
Atp5f1a	52.8155	36.5366	34.3846	24.8632
Rtn4	52.6505	51.8049	51.6462	26.0316
Peg3	52.2621	63.5244	72.5692	42.7158
Cd47	51.8835	45.3659	28.4308	19.5789
Klc1	51.8738	48.2195	41.9846	40.9263
Pthlh	51.699	10.0976	5.06154	3.43158
Atp5mf-Zfp394	51.5825	32.7927	35.3077	19.5474
Uqcrfs1	51.2524	30.5488	29.7692	14.4316
Cdc42	50.9806	55.4512	43.1538	43.9263
Cyc1	50.9126	36.0366	34.7538	23.5579
Rab6b	50.8835	49.3659	49.9692	27.4
Uba52	50.7379	56.1098	56.1077	47.6105
Rabac1	50.2816	48.2439	52.6154	28.8632
Ndufc1	50.233	50.2683	34.5538	26.3579
Fth1	50.0777	52.0122	54.0308	56.6211
Oxct1	50.0291	37.6463	30.8769	21.7684
Alg8-Ndufc2	50.0194	40.9878	33.3077	19.4211
Tmsb4x	49.932	67.4146	44.8923	48.9474
Calm2-073484	49.5728	44.2317	30.3538	42.8737
Akr1a1	49.4854	58.2317	48.4462	32.1895
Bex3	49.2816	59.3415	55.6154	33.1474
Hspa5	48.9126	35.622	41.2154	50.2105
Hsbp1	48.466	45.0732	49.0462	30.4211
Cox5a	48.1553	38.1463	40.0769	20.6737
Dynlrb1	48.0194	55.8537	53.2154	28.1158
Ttll7	47.767	30.3171	22.9846	28.5053
Calm3	46.8835	51.1829	50.7538	34.8105
Ywhae	46.8641	48.6951	45.7538	56.0316
Epha5	46.7379	34.8902	29.7846	14.1895
Eef2	46.5437	51.6707	44.1231	50.5158
Mpc1	46.3398	36.9024	26.2769	19.0632
Ghitm	46.2427	27.622	26.6769	15.4526
Sec62	46.0583	40.0488	48.9385	36.8842
Cltc	46	39.561	52.0308	40.8947
Ndufb5	45.9612	38.8415	35.0462	23.3158
Hcfc1r1	45.1942	46.3902	36.8154	23.2947
Nars	44.9709	40.5732	37.3846	34.8737
Rab6a	44.9612	41.9512	46.9846	20.2421
Ndufa6	44.7573	29.6098	30.4	17.7684
Kif5a	44.7184	40.5732	41.1231	37.1263
2210016L21Rik	44.6699	43.0366	41.4154	40.8526
Lhx6-Ndufa8	44.4854	41.8049	32.2308	23.1789
Crtac1	44.301	24.4146	19.9846	6.31579
Scg5	44.2718	32.0854	28.5231	21.7263
Atf4	44.0583	46.2073	41.1231	26.7474
Atp6v1g1-Tmem268	43.8835	43.1463	42.7846	27.4947
Syt11	43.8252	42.3171	44.2462	35.9158
Ndufb6	43.3981	38.5976	37.6462	17.6526
Ndufb10	42.9515	37.6341	38.1846	24.5263
Oaz1	42.9417	40.9512	43.0769	42.4632
Rpl18a	42.7087	49.2683	41.0769	45.0526
Adck2-Ndufb2	42.4078	36.3171	37.9385	27.2211
Kcnc2	42.3301	20.1098	7.16923	2.28421
Pgam1	42.1553	31.0122	34.0308	19.2421
Ywhaz	41.9903	45.2805	40.8308	47.4947
Tuba1b	41.835	45.4146	29.9692	29.1579
AABR07054460.1	41.5825	31.061	34.7692	10.9895
Phyhipl	41.5534	35.4146	37.7385	10.3263
Fkbp1a	41.4272	45.8537	32.6308	31.9474
Canx	40.9709	43.8537	36.9538	34.4105
Ndufv2	40.8058	37.0488	34.9385	20.4842
Sqle	40.7184	56.4878	54.8154	46.7158
Mdh2	40.6893	30.7439	25.8154	15.0105
Nedd4	40.6311	41.4756	48.4308	33.0947
Dst	40.4563	39.0854	60.4462	92.7895
Atp2a2	40.3689	29.9024	23.7846	31.7474
Ap2m1	40.2913	38.0732	34.2308	23.2
Dnaja1	40.2136	37.4878	28.1231	36.4947
Chga	40.2039	22.6341	28.4	10.3474
Psap	40.1165	27.7439	32.2769	26.7263
Ubb	39.3495	36.5488	44.2769	31.3474
Chl1	39.1456	67.1098	35.6	15.3579
Sod2	39.0777	20.878	24.8462	8.05263
Igfbp3	38.7379	19.561	13.2769	9.53684
Ran	38.4078	45.7805	35.5077	34.0526
Nrxn3	38.3301	53.4024	85.9538	49.1474
Nxph1	38.233	31.8049	5.66154	4.28421
Ywhah	38.1553	35.7073	32.8769	39.3684
Ndufs7	38.0874	28.1829	30.9231	18.2421
Gria4	37.8447	31.3049	23.1385	13.2737
Mapt	37.8252	52.878	51	58.5789
Tpt1	37.8252	37.9634	32.4923	23.5474
Sec11c	37.7961	29.7195	20.1846	31.2
Atp6v1d	37.6796	30.3415	26.1692	23.6316
Rpl35	37.4466	40.3171	38.1077	40.9579
Fez1	37.2816	30.7439	20.7538	28.1684
Got2	37.2233	31.061	29.4462	11.9368
Ppm1l	37.0971	19.6829	7.81538	12.9053
Vdac2	37.0388	28.9512	26.7077	14.4632
Atp6v1b2	36.9903	36.9146	45.2615	34.1579
Atp6v0e2	36.9515	31.8293	33.5846	21.7579
Tubb5	36.9417	64.6585	46.1231	56.0947
Vcp	36.835	48.1829	35.5846	35.9895
Ppip5k2	36.8252	26.1951	14.9846	9.96842
LOC100912227	36.7864	68.8293	80.9385	5.75789
Oip5	36.6117	34.4024	29.1385	7.32632
Apc	36.5728	38.0976	37.4	53.1579
Dad1	36.3883	35.122	26.4154	23.8737
Eif2s2	36.3883	30.878	26.5538	37.7158
Kif1a	36.1553	31.6341	38.3077	34.3895
Actr2	36.0971	45.7439	53.3385	35.0737
Pam	36.0485	38.6951	26.8923	58.3895
Map7d2	35.9612	23	23.3846	24.6
Gabra1	35.9126	10.2927	8.6	11.3368
Myo5a	35.8932	35.561	30.0615	29.9263
Ndufa2	35.8252	28.3293	27.7538	16.8211
Slc3a1	35.7087	30.1585	34.1385	23.8
Ndufs2	35.6214	26.4146	28.9846	12.6105
Serf2	35.5631	31.2195	21.5538	12.6421
Basp1	35.4951	52.7927	41.0462	44.3579
Xkr4	35.466	38.4878	30.1385	20.8105
Uqcr11	35.3689	40.878	31.1538	32.2632
Kcna2	35.3107	14.8902	17.3385	6.44211
Uqcrc2	35.2621	22.3902	24.7077	21.6421
Satb1	34.9612	10.8659	4.21538	3.6
Tuba1a	34.9223	63.4512	48.9385	50.5789
Nefh	34.8641	11.122	11.8769	5.10526
Olfm1	34.767	48.7805	48.0615	60.7263
Rpl41	34.6505	51.3415	41.4769	50.4
Idh3B	34.5922	23.6585	25.8308	14.7789
Gnao1	34.534	46.7073	45	45.6
Rps11	34.4563	38.7317	32.0462	28.0842
Rpl37a-ps1	34.3204	47.3659	36.6308	37.8947
Ntrk2	34.2718	35.8659	26.2462	22.3053
Atp2b2	34.233	27	33.0462	32.6947
Pcdha11-Pcdha9-Pcdha8-Pcdha3-Pcdha10-Pcdha4-Pcdha7-Pcdha1-Pcdhac2-Pcdhac1-Pcdha2-Pcdha6-Pcdha13-Pcdha12-Pcdha5	34.0874	36.3902	33.8462	23.8
Zcchc17	34.0583	26.5122	27.1077	23.0211
Col19a1	33.7573	35.122	36.4154	18.3684
Cox7a2l	33.6019	28.5854	23.9692	14.1684
Aco2	33.6019	28.0976	25.6	18.7789
LOC100910827	33.5146	30.622	23.9385	9.77895
Slc22a17	33.5049	32.1463	33.9077	31.0421
Mllt11	32.9903	36.6098	37.9077	20.8526
Ctsd	32.9806	20.878	32.8615	13.5579
Osbpl1a	32.6893	17.6341	8.6	6.18947
Nedd8	32.4951	29.5854	31.7538	23.8421
Son	32.1165	46.6951	43.1231	113.074
Nsg1	32.0388	18.1341	19.1692	13.7263
Ndn	31.9612	48.2927	39.1538	41.4421
Fabp3	31.8835	27.7561	22.1538	10.7789
Atp6v0d1-Agrp	31.7087	41.878	30.4462	22.1789
Tomm20	31.6505	30.3659	29.3538	25.8211
Bhlhb9-Gprasp1	31.6505	44.0854	47.8462	35.4526
Nme1	31.6214	31.9146	24.0462	18.4737
Atp6ap2	31.5049	31.9756	31.1538	22.0526
Nap1l1	31.4951	28.7805	25.5692	25.2421
Crh	31.4757	34.122	18.5692	1.50526
Sub1	31.4175	35.4634	28.0615	27.4316
Chgb	31.3689	25.3902	24.0923	34.1684
Kifap3	31.2039	37.1341	32.3385	25.7789
Atp6v1f	31.1845	27.6098	24.5538	17.5895
Ndufs3-Ptpmt1	31.1553	28.8537	28.2769	17.6632
Oxr1	31.1165	16.2805	19.9231	14.2526
Hcn1	31.0874	18.378	11.2154	10.7474
Srp14	30.9709	25.878	24.0462	16.8211
Smdt1	30.9709	39.4024	29.0154	16.1158
Serpini1	30.8641	31.6463	40.6923	13.4737
Nmt2	30.8544	34.6707	21.7846	20.4421
Rcan2	30.8252	16.0976	16.9077	11.4421
Clstn2	30.8058	18.8171	15.0615	4.84211
Cited2	30.7476	16.9634	16.8308	7.04211
Syt4	30.6408	20.061	8.52308	15.9579
Kcna1	30.6408	19.1707	15.3385	31.6632
Zranb2	30.6214	30.9878	41.5385	95.4316
Gdi1	30.6117	32.1585	33.8462	31.6211
Polr2k	30.5825	23.0488	16.8	16.3789
Glrx3	30.534	27.6585	24.0923	14.8316
Cst3	30.3883	31.3415	41.4923	34.8
Ndufb11	30.3495	26.5854	23.8615	14.4526
Acot7	30.2913	22.5488	24.9692	14.9053
Guk1	30.2427	24.1829	26.1846	12.5895
Hnrnpu	30.233	32.5122	41.3538	75.5474
Hdhd2	30.1845	20.0976	17.3077	10.2526
Rnf187	29.9126	30.1341	25.6	16.9789
Tmem160	29.9126	23.2927	23.7846	14.3789
Ddx24	29.7864	29	27.0308	34.8421
Fbxo10.2	29.6505	20.7073	19.7692	13.6947
Tax1bp1	29.5049	24.5244	23.9692	26.2737
Rpl23	29.4272	28.3415	31.0923	31.2211
Atp6v0b	29.3883	27.2805	27.2769	19.6842
Kif3a	29.3495	28.8049	30.1692	39.8737
Serbp1	29.2233	34.7195	28.5385	33.3684
Nfe2l1	29.1748	22.7195	22.9077	12.8211
Ift57	29.1068	7.5122	3.95385	7.12632
Nme2	29.0583	42.5732	33.7385	26.8526
Uqcrb-224005	29	22.2561	17.6462	12.9263
Eprs	28.9709	25.939	26.9385	29.2211
Psmb5-AC109100.1	28.9029	31.2073	22.8615	23.7474
Rab14	28.8835	31.3902	27.3846	16.8632
Pin1	28.8835	21.8049	19.4769	19.7789
Pdhb	28.835	19.8659	18.7077	12.6737
Prkar1b	28.7573	34.1098	33.0769	28.4
Got1	28.7282	21.0244	20.9231	16.7579
Atp6v1g2-RT1-CE14	28.5534	23.1829	21.0154	17.6737
Vdac3	28.466	25.1585	24.8	12.9684
Vgf	28.3981	15.1829	7.13846	14.8526
Tmod2	28.3107	33.9268	34.5385	19.3684
Ppib	28.2913	19.6585	19.4769	18.3368
Hsp90b1-AABR07056495.1	28.2816	35.3415	42.8615	46.8842
Prkar1a	28.2621	25.1951	23.2462	21.7053
Zcchc12	28.1845	9.79268	11.5077	15.8
Sgtb	28.165	20.3293	14.2308	10.5684
Clta	28.0097	23.5976	21.4615	19.5789
LOC103692691	28.0097	23.0976	20.8769	17.3053
Dpysl2	27.9515	40.4634	41.6308	27.6737
Ndufs8	27.7864	21.3415	21.1846	9.36842
Minos1	27.767	30.3537	26.3846	17.4
Serinc1	27.7087	33.2683	29.7846	29.9789
Tubb2b	27.6505	56.2439	30.3231	39.1368
Syngr3	27.5728	30.5122	40.7077	14.0421
LOC301124	27.5049	28.7439	27.1538	14.2737
Nrxn1	27.3981	38.6707	30.6	56.8737
Cisd2	27.3689	27.3902	23.7538	15.6316
Cox14	27.2718	21.0488	19.0769	11.2316
Dnmt3a	27.2621	28.4512	24.5692	18.1579
Sult4a1	27.2427	19.939	20.7538	14.4
Ptprn	27.2427	39.0976	42.7077	33.6842
Rplp0	27.233	27.939	38.6	33.3579
Emc4	27.1942	26.2561	22.4769	13.0316
Cerk	27.1359	18.2195	15.7077	6.69474
Cox17	27.0777	21.1098	16.5231	12.9789
Napb	27.0388	29.5854	25.6923	24.0737
Pgm2l1-AABR07004881.1	27	31.8659	24.0308	36.2211
Erlec1	26.9612	18.2561	17.0462	14.9053
Atxn10	26.8932	28.8049	26.0923	18.1895
Maged1	26.8544	38.7195	30.8769	27.9474
Camk2b	26.835	31.8659	32.8308	73.0316
Selenof	26.8252	17.3537	15	19.3579
Timm13	26.7573	21.6585	24.6615	18.5579
Tmem30a	26.7573	18.3537	17.9077	11.6421
Sars	26.6699	23.8171	27.4615	26.7789
Ube3a	26.5825	25.5244	39.5077	35.0316
Slc3a2	26.5825	22.2195	27.2154	15.5684
Gpi	26.466	27.5	24.2462	18.0211
Kif1b	26.4466	30.1707	36.0769	50.6737
Pafah1b1	26.4369	24.1463	21.1231	20.1158
Cnbp	26.4369	24.4634	27.6308	28.4211
Babam2	26.4369	23.7683	20.1846	21.3789
Cd81	26.3883	30.3415	36.8154	36.3474
Pclo	26.2233	36.6951	56.3077	86.9684
AABR07017145.2	26.1942	31.1707	23.4923	7.90526
Celf2	26.165	26.1585	13.4308	64.7684
Tubb3	26.1262	31.7927	27.3692	20.0737
Scn1a	26.0971	19.0976	19.7692	26.2526
Rufy3	26.068	21.7195	27.1077	17.4421
Park7	26.0583	25.2927	20.4923	14.5158
Lonrf2	26.0485	26.9878	26.3231	26.2105
Ociad1	25.9709	22.3293	21.3231	14.6842
Olr1274-Rgs7bp-Olr1273-Olr1275-Olr1278-Olr1279-Olr1280	25.9515	25.6707	29.8769	15.2632
Txnl4a-RGD1560212	25.932	21.5	20.2154	13.7263
Cd320-Ndufa7	25.8544	22.3293	18.0154	13.4421
Naa38	25.8155	24.4878	21.6615	17.9579
Taok1	25.7767	30.0244	23.1231	33.7684
Srrm2	25.7379	42.122	42.3538	92.3368
Arf1	25.6214	29.122	21.9385	24.9158
Ntm	25.6214	9.52439	12.3692	2.95789
Csnk2a1	25.5049	19.7195	21.6154	22.9368
Robo2	25.466	38.9756	32.0769	13.2947
Ndufa13	25.4563	21.0244	36.4154	15.3895
Cd63	25.4466	13.3049	20.0462	11.0632
Cox4i1	25.4369	20.7195	16.6923	9.52632
Srp9	25.4272	19.6585	16.9385	11.0211
Slc25a11	25.3495	28.9146	31.1538	12.0947
Hmgcs1	25.3398	33.2683	28.4462	30.0105
Sem1	25.2427	31.6707	21.7538	17.8737
Ss18l2	25.2233	19.6707	15.4	7.05263
Ddt-Gstt3	25.1942	14.378	12.6923	13.1579
1110004F10Rik	25.1748	20.5	20.2	21.4842
Sucla2	25.1748	17.7927	17.1231	9.8
Atp6ap1	25.1262	21.3171	26.0769	17.6947
Auh	25.1068	16.3049	15.0308	7.73684
Nsf	25.0971	27.4512	28.3077	32.7895
Prdx5	25.0583	17.939	15.3692	10.2421
Psmb1	25.0583	24.4024	26.8769	21.6421
Ankrd11	25.0194	24.4146	29.9077	64.2947
Tmem59l	24.9709	19.6951	24.8769	14.6632
Chst2	24.9709	25.3659	19.2923	12.0632
Plppr4	24.9515	23.4268	19.3231	27.2632
Gpr22	24.9417	7.43902	4.21538	14.3368
Csnk1a1	24.9223	20.7927	21.1846	33.6421
Hsd17b12	24.8932	16.5366	21.7231	6.97895
Ckmt1	24.8738	25.5	33.8923	11.0316
Mrpl17	24.767	16.9512	23.1231	12.1263
AC095947.1	24.7087	19.2439	18.0769	8.72632
Pdap1	24.699	29.9268	18.5385	22.7684
Myh10	24.6796	17.2683	22.4462	33.4737
Cacna1a	24.6602	20.1463	11.8615	38.1053
Cs	24.6602	23.8659	21.0308	12.2526
Pld3	24.6505	22.1341	23.4154	15.4947
Dync1li1	24.6214	19.9878	17	15.6842
Cacnb4	24.4272	15.4756	13	12.0526
Nptn	24.4272	17.5976	18.9692	20.8421
Wasl	24.3689	21.9634	16.3846	12
Ccdc88a	24.3592	37.4756	30.6154	67.7263
Clu	24.3495	12.122	11.4769	5.58947
Thy1	24.3301	19.122	24.8154	14.2632
Calr	24.3204	29.5122	27.0308	28.4421
Prepl	24.3204	20.2805	22.0769	21.3684
Ppp2r1a	24.2913	22.061	20.0154	14.6737
Ncl	24.2621	31.5732	26.6462	31.6211
Sdhc	24.2524	21.6585	18.1538	13.0211
Grin2b	24.2233	28.4024	32.4462	56.1684
Enah	24.1942	12.9024	19.0308	14.9053
Pfdn1	24.1942	25.4268	25.7231	16.5053
Kiaa0408L	24.1748	21.4512	27.1846	30.4105
LOC687780	24.0971	25.939	31.3231	26.8421
Tceal9	24.068	19.0732	25.8154	24.1158
Akap12	24.0583	14.3537	14.3385	4.08421
Spock3	24	32.439	37.8769	12.5368
Cdh13	23.932	11.7195	3.56923	23.3158
Luc7l3	23.8641	37.1707	51.2923	98.4842
Tmx2	23.8447	16.7927	18.7538	9.35789
Suclg1	23.835	18.0488	15.3231	13.6947
Mgst3	23.7573	16.0366	19.7538	10.9368
Stxbp1	23.7282	24.8902	25.9846	23.7789
Srpk2	23.7184	20.3537	24.2615	24.5474
Morf4l2	23.5922	29.3049	28.2	25.2421
Ndufv1	23.534	16.2805	20.3538	12.0737
Snx3	23.5049	22.878	22.3231	19.1579
Lbh	23.4854	16.4878	22.0462	2.65263
Rps16	23.4369	29.1707	24.0462	19.2737
Pak3	23.4369	19.2561	24.0462	22.2316
Zfp385d	23.4175	23.2805	10.6	4.42105
Fam49a	23.3883	26.5366	27.5231	28.0842
Ddx5	23.3592	30.6951	25.2154	30.0421
Sc5d	23.3495	18.8415	21.4154	19.4105
Phlda1	23.3398	8.47561	3	3.58947
Acyp2	23.2718	15.1098	11.4923	10.8316
Ola1	23.2136	19.9512	15.7538	13.6737
Cstb	23.1165	18.4756	19.6923	14.0316
Usp14	23.1068	26.0854	24.0769	22.6632
Rpl14	23.0777	27.9146	25.6154	24.3684
Phpt1	23.0485	22.9878	22.1077	10.0105
Sptan1	23.0194	33.6707	23.5385	30.3474
Eno1	23	18.2439	14.5692	11.9263
Lage3-Ubl4a	22.9903	22.2195	22.5231	9.25263
Ktn1	22.9515	21.3537	21.4615	35.8632
Iscu	22.932	16.561	20.3077	11.7684
Eif4a2	22.9126	21.1341	18.8769	14.8211
Ppp2r2b	22.9029	21.5732	16.0923	21.3263
Hip1	22.835	45.8049	52.9692	16.3895
Zfr	22.835	23.5732	27.0154	31
Ndufa3	22.8155	23.5854	18.4615	11.8526
Rpl3	22.8155	30.5732	28.6154	30.2632
Ccdc50	22.7864	23.3902	26.8	16.5579
Evl	22.7476	22.9268	19.5231	9.92632
Eif3j	22.7379	24.8049	21.0923	19.9053
Rbx1	22.7282	27.3537	22.3692	15.2842
Arfgef1	22.6796	19.5976	19.8923	27.3579
Dync1i2	22.6699	25.1341	20.8769	31.1368
Ank2.1	22.6408	24.7317	17.4308	20.1684
Mkks	22.6214	15.4146	17.5538	7.62105
Sgip1	22.6117	21.5732	27.3385	31.8526
Pfkm	22.5825	17.1585	11.2462	10.7368
Ndufa11	22.5243	22.8293	24.8769	14.6211
Dlgap1	22.5049	18.5366	14.2615	17.4947
Atp6v1c1	22.4854	21.6707	21.4	14.7053
Isca1	22.466	15.2439	17.0923	15.3053
Psmc5	22.4466	21.1829	19.9077	15.8316
Gatd3a	22.4272	14.5976	21.0462	9.76842
Lmo4	22.4175	16.7805	23.3077	11.6842
Dnaja2	22.3786	19.4268	15.9846	21.2737
Pcdh11x	22.3786	24.2073	15.2615	39.1368
Psmb4	22.3689	21.1098	21.8462	19.3368
Nrdc	22.2427	20.9268	15.5231	18.6
Rpl4	22.233	22.7927	21.7538	27.3789
Bmerb1	22.2039	20.1951	19.4769	16.0211
Abcd3	22.1553	21.3171	33.9077	21.6316
Sdhb	22.1553	11.7683	19.1385	11.3158
Pja1	22.1359	18.5244	23.8	20.5895
Spcs2	22.1068	21.2195	22.5846	12.8632
Gnl3l	22.0971	20.2317	28.9692	17.6947
Dynll2	22.0777	18.622	22.6308	10.6632
Ubc	22.0388	19.3415	17.6615	14.3474
LOC108351137-174229	22.0388	14.8537	8.95385	9.44211
C1qbp	22.0194	20.1829	17.5692	11.2842
Mir384	22.0194	37.622	37.2769	41.7789
Cpeb3	21.9903	32.4146	22.4462	11.7789
Ppp1cb	21.8641	19.3902	12.4769	18.9368
2510009E07Rik	21.835	9.47561	10.5231	4.35789
Stub1	21.8252	21.561	25.0462	15.9579
Slk	21.8155	20.2317	15.5077	11.2105
Zfand5	21.7184	16.9024	20.0769	21.3053
Rab2a	21.699	21.8171	16.9692	23.4421
Pafah1b2	21.699	25.2927	21.1538	19.5158
Itm2b-Rb1	21.6408	25.6707	24.9692	26.7895
Ubxn4	21.6311	20.1585	17.4615	18.2632
Hspe1	21.6311	17.2805	20.2769	9.83158
Tspan7	21.6214	16.3049	22.2923	18.6632
Aplp2	21.5825	19.1585	21.9231	16.2947
Idi1	21.5534	22.6585	21.2923	36.7053
Usmg5	21.5243	19.3659	11.4769	8.33684
Akap11	21.5049	17.878	20.6923	24.9579
Dctn2	21.5049	16.2805	18.2462	13.2105
Nit1	21.4951	17.1585	11.0154	10.8105
Birc6	21.4951	22.8537	23.4308	27.1158
Ppp3ca	21.4757	22.4024	21.7538	67.8737
Cct5	21.4757	18.0122	18.0154	15.3053
Galnt13	21.4563	13.1951	17.0615	7.27368
Scg3	21.4466	23.439	23.5692	20.1789
Mrpl12	21.4272	18.4146	17.6923	7.66316
Eif1	21.3592	26.4512	17.0154	16.2
Ddah1	21.3107	19.4512	26.3231	8.43158
Akap9	21.2913	23.3293	25.6308	48.9263
Psmd4	21.233	15.0122	14.5538	17.6
Dld	21.2233	19.3293	10.9538	9
Psmd1	21.2136	16.3049	14.1538	17.7684
Pgp	21.1262	15.6098	21.2923	11.1579
Rabep1	21.0874	20.4512	19.4462	15.3789
4932438A13Rik	21.0874	21.9024	27.2308	34.5895
Ube2k	21.0777	22.6098	19.9077	23.9579
Tmx4	21.068	22.8537	20.4308	23.8842
Ssu72	21.068	17.6829	14.5692	9.21053
Cyp51	21.0583	26.8659	29.4154	26.3368
Cops9	21.0583	23.3902	27.1692	14.8737
Sdha	21.0194	19.6585	14.7231	9.65263
Mrps18a	21.0194	14.4634	18.8462	11.1895
Pmm1	20.9709	15.5122	24.3538	16.7895
Eif1b	20.9126	24.8415	18.9692	13.9474
Gars	20.8835	15.9024	14.1538	11.1474
Araf	20.8058	14.7073	13.0308	8.88421
Atox1	20.7961	16.7927	14.8923	10.5895
Snap91	20.7961	21.4634	20.5846	19.8105
Cacybp	20.7864	22.1707	24.1692	20.3684
LOC108352650	20.767	21.8537	14.7538	11.2737
Cfl2	20.7476	22.7927	18.8154	11.4421
Gabrg2	20.7282	9.81707	10.8154	14.0632
Rheb	20.7087	16.1463	17.8154	20.2842
Gm1673	20.6311	28.0244	20.5077	11.7789
Jpt1	20.5922	29.6098	31.3846	29.4526
Ndufa9	20.534	20.5976	17.1231	12.0211
Tpm1	20.534	14.5732	17.8154	26.8105
Plekhb2	20.534	13.5732	13.3385	7.29474
Selenot	20.5146	16.8537	14.0462	11.7158
Hdlbp	20.4951	18.4634	19.4154	22.6947
Ptn	20.4757	23.4878	13.2154	17.7053
Lrrfip1	20.4757	19.0122	16.4308	31.1684
Spock1	20.4175	14.3902	14.5077	13.2105
Lancl1	20.3592	16	9.43077	6.37895
Higd1a	20.2913	20.6341	14.8615	14
Paip2	20.2816	18.9756	20.6154	14.4947
Hnrnpa2b1	20.2718	22.9024	24.4308	30.0526
Psip1	20.2718	27.2683	24.6615	28
Psmd12	20.2233	19.2317	18.8615	15
BC031181	20.2233	19.3293	19.3538	10.6632
Napg	20.1942	20.2927	18.4615	18.7368
Tuba4a	20.1942	18.0244	11.1231	18.4
Selenom	20.1456	21.6341	15	27.8105
Clstn1	20.1456	20.5	17.4769	15.8947
Arhgap5	20.1262	20.439	13.2154	15.2947
Rpl24	20.0971	24.8049	22.0462	20.1684
Ppa1	20.068	17.1829	12.5385	10.2421
Ppp1cc	19.9903	17.4512	13.0769	16.2211
Snrnp70	19.9029	31.561	41.3692	88.4211
Rpl19-AC135443.1	19.8835	21.8049	24.0923	21.4947
Fnbp1l	19.8835	26.5122	39.6154	16.8737
Tmem178b	19.8738	17.4268	15.5077	14.9053
Lpl	19.8252	5.21951	1.86154	3.95789
Chmp5	19.8252	21.2561	19.5077	20.0421
Rps3	19.7282	23.8049	16.0923	23.6737
Elavl2	19.7282	22.1585	19.1846	7.95789
Rpl18	19.7184	20.4146	21.7538	16.0632
Cemip	19.7087	10.9146	7.83077	3.29474
6430548M08Rik	19.7087	13.0976	18.6923	10.8947
Gabra4	19.6699	9.9878	10.1538	7.89474
Plxdc2	19.6311	13.8293	23.4923	4.56842
Pmvk	19.6214	18.9512	26.9538	13.5368
Ttc1	19.5922	16.122	17.6	10.3579
Rexo2	19.5534	17.5	14.6462	19.4421
Tecr	19.5437	19.878	19.4462	11.5158
Ank3	19.5049	23.2683	31.4769	64.1368
Sqstm1	19.466	20.2805	15.8308	15.6947
Cct8	19.4369	21.6829	19.6923	14.4421
Rgs4	19.4369	8.70732	3.18462	35.2526
Plxna4	19.4175	8.31707	11.4769	18.5368
Smim26	19.3981	15.2317	11.9538	11.0632
Rbbp7	19.3301	16	12.3846	20.1579
Nudt4	19.3107	16.6463	12.9538	6.21053
Ppargc1a	19.2816	13.1098	5.56923	9.16842
Tomm7	19.2816	20.0976	17.2154	14.1474
Akap6	19.233	17.2439	17.0923	23.8211
Eea1	19.2039	15.0122	22.2	15.0211
Gpx4	19.1845	21.2439	20.3231	9.31579
Scp2	19.1748	15.8415	12.8154	7.07368
Lsm7	19.1068	24.5244	19.9231	17.1368
Fam162a	19.0971	12.9024	19.6615	10.0105
Tpr	19.0874	17.6585	18.0923	33.1579
Npepps	19.0485	19.9634	23.0923	23.3579
Kidins220	19.0388	22.6829	20.0615	21.0105
Tll1	19.0291	9.08537	4.01538	5.96842
Sf3b2	19.0194	21.1951	22.6462	23.0421
Gtf2h5	18.9903	21.9268	19.3692	11.5053
Abcf1	18.9709	23.1098	21.2308	23
Tceal5	18.9709	18.5854	15.8462	15.6526
Cfl1	18.9029	22.5	19.7846	19.4211
Actr10	18.8835	17.6707	14.8308	9.16842
Cntnap4	18.8544	17.6829	12.4154	5
Ncam1	18.8544	21.1585	27.8462	21.2105
Ppm1e	18.835	19.5366	11.4	16.6316
Mir6326	18.8252	17.9268	12.1846	8.89474
Dpm2	18.8252	14.3293	17.2	11.4526
Cfap36	18.8155	16.8293	20.7846	18.8947
Rims1	18.7767	24.0366	14.8615	26.2105
Arf5	18.7476	21.939	19.0154	25.2421
Atp8a2	18.7379	22.0732	23.9385	12.3789
Ensa	18.7379	17.878	13.6462	30.8421
Acsl6	18.7282	9.7561	12.6308	11.0421
Elob	18.7087	19.0244	19.7538	16.9895
Psma6	18.699	17.1829	16.8462	11.1789
Nrcam	18.6699	31.8293	20.4	53.4316
Ddx17	18.6602	24.8171	21.8462	60.5895
Ahi1	18.6117	28.5976	34.0462	103.768
Itfg1	18.6117	13.5122	17.9846	7.62105
Scd2	18.5922	35.2561	24.1077	26.9158
Rnf14	18.5922	17.8537	14.7538	11.9789
Rpl11	18.5922	22.3537	20.9846	20.3789
Gabra2	18.5437	17.5366	18.2615	28.1263
Resp18	18.5049	15.4268	12.5077	11.5789
Bzw2	18.4563	17.6951	15.4615	12.8
Atp6v0a1	18.4466	13.9756	15.6154	14.8632
Apbb1	18.3981	18.6341	14.7692	19.8316
Snx10	18.3981	18.4268	19.5538	13.7895
Rpn1	18.3786	19.7683	22.1231	23.6737
Spcs1	18.3689	23.7561	19.0462	13.9789
Aars	18.3495	16.561	18.6	12.6211
Serinc3	18.3495	14.3171	14.0308	10.7368
Chchd3	18.3301	11.1951	11.9846	11.7368
Rsrp1	18.2913	26.6098	35.9385	33.5684
Dnajc15	18.2816	11.378	8.8	14.6737
Yars	18.2524	16.0976	13.5077	8.63158
Mest	18.2427	13.6829	13.0308	38.4842
Psmb3	18.2233	17.4634	14.4462	12.3368
Usp9x	18.2136	20.9756	21.9692	19.1474
Pnisr	18.1942	23.3537	34.4154	71.2421
Tmed10	18.1942	18.9268	18.1385	9.6
Acat1	18.165	16.3902	19.6923	13.8211
Ndrg3	18.1359	20.0488	14.6462	16.1895
Crmp1	18.1262	37.2317	26.0923	28.0632
Iqsec1	18.1165	16.1585	9.69231	6.92632
Npdc1	18.0971	17.0366	23.6615	16.9158
Flywch1	18.0874	13.878	18.8	11.4
Clstn3	18.0777	16.5	24.4769	13.3789
Cab39	18.068	12.6463	12.5385	8.93684
Rps27	18.0485	29.1098	18.5077	20.9895
Pfdn5	18.0485	17.5122	16.6	23.4316
Atp13a2	18.0388	19.8902	17.8308	14.8316
Gabbr2	17.9515	12.4024	8.2	12.5474
Tenm3	17.9417	11.4878	13.5692	12.5263
Cap1	17.9126	15.0366	13.7385	7.50526
Ostc	17.8835	15.5366	14.2769	9.69474
Kcnq3	17.8835	26.1829	27.6462	6.32632
Saraf	17.8738	22.6463	21.5692	17.8316
Reln	17.8738	96.8902	126.785	6.71579
Prpf4b	17.8544	20.2561	24.7692	45.1684
Grm4-Mtch1	17.8447	22.0122	25.7385	22.0105
Rbsn-Mrps25	17.8252	14.561	22.2615	12.0421
Mrpl43	17.7961	18.2439	12.8769	14.8526
Zfp804a	17.7961	13.7561	3.78462	4.88421
Ptprt	17.7573	14.3293	3.04615	2.73684
Plppr5	17.7476	17.5244	19.7538	7.35789
Hp1bp3	17.699	15.8293	13.3692	16.1474
Map4	17.699	15.0854	14.8462	16.7158
Slc5a3	17.6796	14.0854	16.7692	11.3789
Ppp2r2c	17.6796	16.4756	18.6	16.8421
Psmc3	17.6796	18.0488	16.7231	16.2105
Mt1-Mt3-Mt2A	17.6408	18.6707	8.64615	33.8737
Hypk	17.6408	19.2683	16.9385	14.8316
Scoc	17.6311	20.0488	16.7846	17.6947
AABR07006476.1	17.6214	14.561	7.23077	14.3579
Phf14	17.5631	24.8415	17.1385	22.3263
Dtna	17.5243	13.3293	13.8462	22.9895
Aamp	17.5146	14.2927	15.6615	12.6842
Pcp4l1	17.4951	15.0244	23.0154	2.87368
Amd1	17.4951	12.7805	12.7077	10.1368
Bod1l1	17.4563	21.0976	25.1846	26.4842
Timm17a	17.4369	11.2073	16.5846	9.48421
Psmc1	17.4369	17.9756	21.3846	12.2947
Ankrd17	17.4272	18.2927	15.5538	27.9158
Tomm22	17.3883	14.8049	16.1077	9.27368
Nckap1	17.3689	24.6585	17.4615	27.8947
Smarca4	17.3398	23.9878	25.4615	29.4211
Ankrd12	17.3301	20.622	19.1846	24.4526
Opcml-236228	17.3204	10.6585	25.4154	17.6632
Kalrn	17.3107	17.1098	25.9846	20.1368
Dnajc5	17.3107	11.8537	16.1538	15.2105
Herc1	17.3107	23.1951	20.5692	34.1789
Chmp2a-Ube2m	17.2427	18.061	17.7692	17.4737
Dync1li2	17.2427	12.3902	17.3385	7.62105
Tango2	17.2136	15.9146	13.5692	8.62105
Mrpl20	17.1942	8.63415	16.1692	11.2421
AABR07015346.1	17.1845	13.7195	13.1231	10.6737
Psmd7	17.1845	16.7805	16	17.7053
Atp5mc2	17.1456	16.6707	14.1692	8.58947
Gpm6b	17.1456	21.8537	26.0769	19.3684
Gria3	17.1359	13.8293	5.86154	4.78947
Mphosph8	17.1165	20.3902	24.9077	31.3474
Cct3	17.0971	18.3902	15.3538	14.8316
Ddx1	17.0874	13.1829	13.5538	12.1053
Tmsb15b2	17.0291	29.8902	18.1385	15.2526
Adcy1	17.0194	12.8049	4.52308	22.9684
Vps35	17.0194	12.9512	19.0615	13.6632
Zc3h15	17.0194	18.122	15.1077	14.5053
Adam23	17.0194	16.1463	12.6308	23.0421
Mea1	16.9903	19.4634	22.5692	12.0211
Mycbp2	16.8932	13.939	18.2308	30.7579
Rock2	16.8641	15.7683	14.5692	57.6632
Txn1	16.8447	19.1585	13.9692	16.0211
Cul3	16.8447	22.6585	15.0615	14.3158
Cystm1	16.8252	14.5244	12.7077	7.82105
LOC100362432	16.8058	21.122	12.8154	11.2737
Vstm2a	16.7864	16.1341	33.2308	5.07368
Hspa4l	16.7767	15.6585	14.2154	8.09474
Bola3	16.7767	11.9146	12.1077	4.76842
Jak1	16.7476	9	14.7846	9.96842
Pnma8b	16.7282	25.8659	27.5538	45.0947
Clasp2	16.7087	21.4634	14.6923	16.1474
Pcp4	16.699	25.0122	42.4923	29.1684
Rab27b	16.699	11.1829	13.1846	3.89474
Psmb2	16.699	15.0976	12.7077	11.6421
Rps6ka5	16.6893	12.8171	2.70769	5.32632
C1qtnf4	16.6699	12.1951	12.6154	9.33684
Erc1	16.6602	22.7561	24.3077	23.2737
Rap1gds1	16.6505	13.878	19.4	7.16842
Wdfy1	16.6408	12.8415	15.9692	11.6421
Aak1	16.5825	9.03659	15.0154	8.21053
Nap1l4	16.5631	15.439	13.3231	9.46316
Dnajb4	16.5437	7.9878	3.75385	3.96842
Dpp7	16.5243	11.3293	12.2769	8.16842
Grina	16.5243	14.439	15.6	10.9158
Dnajc18	16.5049	9	7.13846	7.81053
Dctn3	16.5049	13.2439	14.4615	13.3684
Rspo3	16.4951	8.45122	7.90769	9.50526
Cox6a2	16.466	6.36585	4.73846	1.91579
Cfdp1	16.4563	18.9512	19.0615	20.8526
Impact	16.4369	22.2561	19.0308	24.8316
B2m	16.4175	16.0976	13.3077	5.42105
Syp	16.4175	14.3902	16.8462	17.9789
Arpc3	16.4078	15.2805	14.5385	18.6947
Dbi	16.4078	20.6098	14.6769	10.2842
Fbxw7	16.4078	16.1463	16.6	20.5263
Atcay	16.3883	12.2195	16.1385	17.0526
Ccdc136	16.3398	12.122	9.56923	7.78947
Wwp1	16.3301	15.5	18.0462	12.8105
Thsd7a	16.2816	9.5122	11.2	25.7789
Pcm1	16.2524	19.5854	20.2308	30.1579
Psma1	16.2427	14.8902	12.6	12.4105
Nipsnap2	16.2427	12.122	13.4462	10.4632
Rps5	16.2136	16.3293	16.2462	18.1158
Dusp3	16.2039	13.4634	8.83077	14.6105
Sumo1	16.1942	19.378	14.1385	16.7368
Epha4	16.1942	9.07317	5.35385	17.3368
Edf1	16.1553	19.3537	20.5692	13.8
Sugt1	16.1456	14.8293	10.6308	12.6526
Dlst	16.1456	14.8659	12.6154	8.85263
Brinp1	16.1359	15.5732	22.6154	7.96842
Oaz2	16.1359	17.7195	17	8.98947
Enpp5	16.1262	11.6585	11.4154	6.54737
Atp1a3	16.0971	10.1951	10.5692	7.92632
Tm9sf3	16.0874	14.3293	12.2308	10.5474
Sf3b1	16.068	17.7439	23.3692	57.2947
Mef2a	16.0291	12.0976	17.7231	26.7053
Ap2a2	16.0097	19.9268	13.5077	15.2316
Atp6v1a	15.9903	12.6341	15.6769	13.2632
Mrpl48	15.9806	15.1829	12.6154	8.73684
Epm2aip1	15.9806	15.4756	17.1538	7.61053
Slc1a1	15.9612	7.15854	12.0769	9.94737
Ankrd46	15.9612	12.939	10.8308	7.09474
Spag9	15.9515	16.5122	20.3692	14.4105
Pip5k1c	15.9515	15.3293	17.3385	24.3263
Cox6b1-004303	15.9029	14.6707	14.0769	8.25263
Glg1	15.8932	15.2683	25.1538	22.0421
Prelid1	15.8641	12.8049	10.8615	9.56842
Tmsb10	15.8641	56.1341	46.6308	25.7684
Ctnnb1	15.8544	16.7561	13.8308	17.2947
Dnajc19	15.8155	17.9634	14.8462	12.8211
Sfpq	15.7864	18.4146	20.4308	23.9368
Cyp3a2-Arpc1a	15.7282	16.0488	16.2615	17.6421
Cand1	15.7282	9.71951	10.5385	8.25263
2020-09-07	15.7282	15.8171	15.8769	17.4316
Rab11b	15.699	14.9024	16.0308	8.72632
LOC102555659	15.699	20.9756	14.6462	22.5684
Selenok	15.6796	13.5122	13.9077	9.63158
Limch1	15.6602	13.1951	10.3385	23.4632
Glrx2	15.6505	14.6829	16.1231	9.34737
Nrip3	15.6214	13.622	27.4308	7
Glrx5	15.6019	12.122	11.8615	4.52632
Ssr4	15.6019	12.7683	14.0462	11.6947
Cdip1	15.5922	12.2805	10.3538	10.4316
Cmip	15.5922	22.1098	19.3692	18.9895
Scn8a	15.5825	13.0122	9.44615	18.6842
Pea15	15.5728	12.6951	14.5538	7.89474
Psmd6	15.5631	14.3293	10.3846	9.8
Psmd2	15.5534	14.4878	16	15.9895
Idh3g	15.5534	11.8415	15.1846	11.4105
Pcdh7	15.5437	8.17073	6.55385	7.93684
Psma3l-Psma3	15.534	20.5976	12.2154	9.6
Ube2d3	15.5243	16.6463	13.3077	12.4842
Cdc37l1	15.5049	13.622	15.3538	19.6526
Fkbp2	15.4757	15.2317	11.6	8.29474
Zcrb1	15.466	14.0122	18.2154	14.1474
Arl6ip1	15.4563	17.061	33.2	21.3053
Atp6v1h	15.4563	10.8415	11.6923	8.51579
G3bp2	15.4272	10.7195	12.9077	9.04211
Trappc1	15.4078	15.0122	14.6	7.23158
Adam22	15.3981	11.7073	11.6769	9.70526
Nipa1	15.3883	13.3659	17.9846	5.35789
Tkt	15.3883	13.8902	16.4308	12.9579
Ptpn11	15.3786	11.2561	16.6462	14.9684
Synj1	15.3689	12.8049	22.0615	14.7789
Fdps-122886	15.3592	24.0976	23.5077	21.8526
Rps24	15.3204	19.061	12.9231	11.8421
Ssr2	15.3204	13.6707	11.4154	10.4842
Cct7	15.3204	16.5122	13.8462	16.6105
Trim37	15.3107	13.878	8.75385	7.69474
Apba2	15.2621	13.3537	12.3846	34.9158
Bnc1-Hdgfl3	15.2621	19.6463	19.2308	8.38947
Marcks	15.2621	28.2805	17.1692	24.8105
Laptm4b	15.2621	8.26829	11.1231	2.53684
Usp34	15.2427	20.1341	21.7077	40.1895
Srpra	15.2427	14.8902	14.8462	17.2105
LOC100911769	15.233	13.939	11.8769	8.03158
Diras1	15.2233	16.939	14.0923	13.4421
Acsl4	15.2136	19.8537	14.0154	15.5158
Gng3	15.165	18.3537	13.2462	11.2737
Cbx5	15.1456	19.7317	18.4615	22.6421
Mrpl15	15.0971	14.4634	11.1231	8
Pam16	15.0874	12.1098	13.7231	8.16842
Pitpna	15.0874	15.5	10.9846	9.2
Emc7	15.0777	9.89024	11.6769	7.64211
Chd4	15.0777	12.1585	18.9231	23.4526
Tfrc	15.0583	8.7439	5.72308	6.42105
2020-09-11	15.0583	15.6829	13	62.4316
Tmem208	15.0583	10.5976	11.8154	6.2
Ppig	15.0194	15.9756	15.4769	24.7789
Ncam2	15.0097	20.3902	17.6769	16.8211
Smap1	15	11.0854	10.8308	7.52632
Rab1a	14.9806	11.378	12.1538	12.0421
Mtpn	14.9806	19.0854	13.8154	20.8737
Psmc6	14.9417	13.3049	11.8	9.02105
Prkacb	14.9417	13.3049	9.69231	15.2526
Serp2	14.932	13.4512	17.3538	11.4421
Mrpl35	14.932	11.4146	12.9385	7.41053
Tmem179	14.932	10.3415	13.1692	5.55789
Hspa12a	14.9126	9.78049	12.0462	7.63158
Nipsnap1	14.9126	16.3659	15.7692	17.9368
AABR07072748.2	14.9029	14.4512	24.8308	15.2211
Nsg2	14.8544	30.439	23.2923	21.4316
Dynlt1	14.8447	16.7195	9.95385	6.2
Rnf214	14.8252	16.1829	15.0154	17.6316
Smc6	14.8058	15.9878	13.3692	17.0526
Hspa4	14.7961	12	13.1385	11.7474
Poldip2	14.7961	8.87805	7.70769	5.75789
Ccdc186	14.7961	11.1951	12.5385	7.65263
Tm2d2	14.7864	10.0732	14.5692	12.1579
Gadd45g	14.7864	3.97561	8.90769	7.64211
Gpr35-Gpc1-Aqp12a-Olr1349-Olr1353-Olr1352-Olr1346-Olr1347-Ppp1r7-Rnpepl1-Olr1351-Sned1-Capn10-Agxt-Olr1350	14.7864	19.8659	14.1846	10.1263
Pfkp	14.7767	12.0366	17.6154	15.1263
Cdk11b	14.7476	19.0854	14.6308	23.5053
Tmx1	14.7379	17.2805	22.6308	11.5053
Gpm6a	14.7282	44.6707	33.9231	53.2947
Zfp91	14.699	20.561	17.9231	15.2526
Ctsa	14.6893	9.90244	8.87692	7.63158
Cops7a	14.6893	11.4878	10.9077	4.38947
Rbfox2	14.6796	15.8049	13.9846	14.8421
Capza2	14.6699	19.5366	14.5538	15.9053
H2afz	14.6602	13.3537	14.1385	12.9789
Psma5	14.6311	15.2805	11.6769	11.4
Arl8b	14.6311	11.8293	11.7385	8.84211
Zrsr2	14.6214	19.6463	18.3231	16.0632
Prnd-Prnp	14.6117	13.7683	15.2923	19.7684
Slc25a17-St13	14.6117	17.9146	21.6308	15.3053
Timm10	14.6019	14.4756	9.53846	7.04211
Kras	14.6019	12.5854	9.92308	14.6421
Pcyox1	14.5825	13.8293	16.8154	7.11579
Fhl1	14.5631	20.6585	21.4923	10.0211
Ndufa10l1	14.5534	10.9878	10.5231	6.56842
Rpl15	14.5437	13.7073	13.6154	13.5053
Tmem50b	14.534	10.5122	12.4615	7.70526
Arpc4	14.534	16.5	11.2923	9.85263
Asph	14.5243	16.1951	12.8462	13.8
Vps41	14.5049	10.6463	14.7692	8.71579
Krtcap2	14.4854	14.1951	13.7231	9.46316
Sec61b	14.4854	13.7927	10.2769	15.7474
Vps28	14.4854	13.3171	11.7077	10.6526
Aff4	14.4757	17.7317	17.8154	21.3789
Ddost	14.4757	9.73171	11.4462	8.49474
Cops5	14.4757	12.878	14.8923	12.8632
Rps15	14.4757	16.1098	15.0462	12.4211
Rab11a	14.4757	12.5854	13.7538	10.6842
Map1lc3b	14.466	16.0122	10.7231	6.34737
Letm1	14.4563	16.5122	11.5846	11.1158
Ndufs1	14.4563	9.36585	9.41538	5.25263
Agtpbp1	14.4369	10.3659	10.0462	13.5579
Gnaq	14.4175	23.7073	10.7692	18.1789
Fgf13	14.4175	15.0244	16.8923	13.5474
Glo1	14.4078	11.2439	12.0154	11.5474
Mapk9	14.3883	13.6585	9.86154	13.1684
Ccdc85a	14.3592	9.54878	12.2923	8.64211
Rb1cc1	14.3495	13.4024	18.0154	21.2211
Slc24a2	14.3398	10.8902	3.12308	20.4737
Tubb4b	14.3204	16.4756	12.2154	15.5895
Strbp	14.3107	12.7683	18.2769	15.9684
Fgf12	14.2816	12.3293	10.2308	5.6
Tusc3	14.2816	18.3902	14.6154	16.8737
Macf1	14.2718	20.7073	23.7692	42.6947
Bri3bp	14.2621	12.5366	9.36923	10.8
Sdcbp	14.2524	7.71951	7.29231	16.4105
Xkr6	14.2136	9.93902	14.1692	9.4
Bin1	14.2039	11.7805	13.1385	21.9368
Txnl1	14.1845	15.6585	16.5077	13.6947
Cdipt	14.1748	12.5488	14.7077	11.2316
Ncoa7	14.165	15.9512	12.9231	20.9053
Pi4ka	14.1553	11.1707	11.8769	13.6421
Syn2	14.1359	20.8171	27.6154	20.5789
Eif3a	14.1262	14.5976	15.9385	16.6632
Nop10	14.1068	13.7561	10.6308	6.28421
Brk1	14.0971	14.5488	14.5231	12.0737
Tmbim6	14.0388	12.7073	13.5692	12.7684
Nucks1	14.0291	17.3537	14.5692	15.6632
Pcbp1	14.0291	14.1951	12.3846	13.6842
Dctn1	14.0194	15.5976	10.4	18.3684
Rala	14.0097	16.3171	16.0308	14.0211
Taf9-Ak6	14.0097	13.1341	13.7692	10.5684
Chchd1	14	18.4634	13.4	9.13684
Tsc22d1	14	16.6951	13.3538	13.6526
Hspbp1	14	13.4268	8.41538	9.08421
Ilf2	14	19.6463	17.9692	15.3789
Sltm	14	14.1463	20.7231	31.6105
Ppp1ca	13.9903	22.4024	13.5692	11.3789
Uhmk1	13.9903	14.0366	9.70769	7.03158
Ndfip2	13.9903	9.36585	8.06154	10.0632
Dnpep	13.9806	14.8171	17.0462	10.1474
Eps8	13.9709	8.07317	11.5231	5.94737
Mcts1	13.9709	12.4024	10.3077	7.15789
Kif5b	13.9612	18.8659	22.2923	14.0842
Dhx36	13.9612	12.1951	14.6308	16.3474
Elmod1	13.9417	10.622	12	12.9895
Lrrc4c	13.932	11.0122	9.73846	10.7895
Lsm12	13.9126	15.061	14.0308	13.1579
Srp19	13.9126	12.0976	9.01538	11.7474
Lamtor2	13.8932	11.5244	13.0615	8.10526
Dclk1	13.8835	23.0976	19.1692	28.9263
Cit	13.8641	5.93902	10.7077	14.4842
Magee1	13.8544	13.0976	14.7077	7.44211
Dipk1b	13.835	10.6585	9.70769	7.38947
Mrps15	13.835	16.6707	10.4769	12.8842
Ptprs	13.8252	15.7439	15.7692	34.1158
Gls	13.8252	15.5732	21.3538	19.1684
Car2	13.8155	5.10976	3.07692	3
Herc2	13.7961	20.0366	23.9692	27.6632
Gsto1	13.7864	7.41463	9.52308	6.72632
Pdcd6	13.7767	9.52439	5.92308	9.48421
Extl2	13.7767	5.97561	7.09231	3.94737
Lynx1	13.7767	5.70732	5.70769	3.10526
Ctsl	13.767	10.5366	11.8	5.46316
Neto1	13.767	18.3049	12.9231	16.6947
Bnip3l	13.7573	17.3171	16.4308	11.5684
Acsl3	13.7573	9.58537	12.1231	10.6
Plcxd3	13.7476	5.07317	4.81538	6.84211
Rab3gap2	13.7282	16.3902	17.2462	10.8
Gucy1a1-Gucy1b1	13.7184	12.561	15.7692	12.3263
St6galnac3-Rabggtb	13.7087	11.0854	11.7077	11.0105
Sar1b	13.699	14.8659	15.6769	9.55789
Ndufs4	13.699	11.5366	8.23077	7.73684
Map1lc3a	13.699	11.5488	7.53846	5.24211
Sorbs1	13.6893	11.0366	10.8	22.0632
Dtd1	13.6893	19.6829	14.4769	15
Mydgf	13.6893	11.1707	8.4	7.69474
Pfdn2	13.6796	17.1829	14.2154	12.8316
H3f3b	13.6699	16.6951	13.3077	16.2632
Pnma2	13.6699	15.9756	14.1385	9.13684
Rab5if	13.6699	8.91463	9.35385	10.3053
LOC100911177	13.6505	8.37805	11.9538	5.26316
Cope	13.6408	10.3415	13.8	10.3579
Ap3d1	13.6117	11.4634	14.3077	23.3579
Eif4a1	13.6019	13.0976	14.7538	11.0947
Spock2	13.6019	10.9756	16.1538	18.8105
Oga	13.5922	16.1951	18.5846	18.4421
Pnn	13.5922	19.7805	24.7077	47.2842
Chd5	13.5825	24.4634	19.6462	20.1579
Ywhaq	13.5825	17.3293	12.4769	15.3684
Tenm2	13.5728	16.6098	9.43077	14.0211
Gadd45gip1	13.5437	11.7927	12.1846	8.95789
Cep19	13.534	8.81707	8.56923	4.67368
Ypel5	13.534	7.80488	7.35385	5.01053
Trim2	13.5146	13.0244	13.1077	13.2947
Scrn1	13.5146	9.30488	6.55385	5.08421
Vamp2	13.4951	18.0854	14.5846	12.7053
Ptov1	13.4854	14.0366	11.8462	11.6211
Kcnc1	13.4854	4.85366	6.63077	6.04211
Map2k2	13.4854	13.9512	17.2769	10.0316
Kif2a	13.4757	12.4878	14.7846	11.8421
Pithd1	13.4757	9.39024	8.10769	5.62105
Clip4	13.466	6.93902	4.84615	10.1579
Pkp4	13.4563	15	12.4308	25.1789
Dcun1d4	13.4466	8.90244	11.6	4.72632
Pdhx	13.4466	10.4634	9.01538	4.14737
Ecpas	13.4272	23.6707	15.8308	19.3368
Agap1	13.4175	18	16.1231	14.4737
Tomm40	13.4078	12.061	12.8308	9.35789
Chd6	13.4078	15.4146	18.4154	30.3158
Ufc1	13.3981	14.4146	14.6462	11.1368
Opa1	13.3883	10.8049	9.90769	7.45263
Cct4	13.3883	16.3293	13.9231	12.6
Ccdc107	13.3883	10.5122	12.1846	7.75789
Kcnma1	13.3786	9.06098	3.95385	16.6
Dnm1	13.3786	7.28049	10.4615	11.7579
Fam19a5	13.3786	10.8659	16.7538	5.69474
Dnajc8	13.3689	13.6707	13.8	16.0737
Btbd1	13.3592	12.2073	10.6615	7.03158
2020-09-06	13.3592	13.8049	7.86154	9.66316
Abhd17b	13.3398	11.6463	10.3538	6.18947
Pcnp	13.2913	11.0732	16.2615	8.97895
Mrps36	13.2913	10.1341	11.7385	5.31579
Dlg2	13.2816	12.2805	12.5538	13.1579
Mrpl54	13.2816	9.89024	12.8769	5.52632
Naa20	13.2524	7.0122	6.26154	4.69474
Sdhd	13.2524	10	8.6	6.72632
Dmxl2	13.2427	15.1341	11.2923	19.6526
Atrx	13.233	19.9146	16.7692	25.2316
Hagh	13.2233	9.76829	7.90769	7.82105
Mrpl28	13.2233	7.78049	9.84615	6.23158
Lamtor4	13.2039	12.2073	13.8308	5.81053
Dctn6	13.2039	16.3293	11.3231	5.50526
Pabpn1	13.1942	20.4634	26.0462	46.8526
Ppp3cb	13.1942	16.8171	15.2308	18.2632
Fgfr1op2	13.1942	10.3171	10.0769	12.0421
Slc6a7	13.1845	10.878	14.6769	3.70526
Casc4	13.1748	12.5366	13.3077	16.2
Akap5	13.1748	8.26829	8.18462	5.14737
Dock3	13.1748	17.6951	12.1538	17.4316
Hspd1	13.1748	10.9268	8.50769	6
Dpcd	13.1553	10.7927	15.7231	8.03158
Trim44	13.1553	16.3049	13.8923	17.6947
Pcmt1	13.1456	11.7561	9.84615	7.64211
Immt	13.1456	8.39024	10.5385	7.64211
Aplp1	13.1359	20.7561	24.2923	21.6211
Nmt1	13.1262	12.6098	9.67692	16.6947
Mrpl45	13.1165	11.7561	11.9385	10.6526
Ssr3	13.1165	16.5244	15.2923	16.7368
Timp2	13.1068	14.6829	11.8154	18.5158
Idh3a	13.0777	9.87805	10.5077	7.88421
Myo9a	13.0777	18.5	16.7846	19.8316
Cdc5l	13.0777	9.96341	8.33846	14.1579
Chchd6	13.0583	8.70732	11.7077	9.10526
Clec2l	13.0583	6.30488	7.15385	4.50526
Rpsa	13.0583	19.6951	12.3538	15.6421
Eef1g	13.0485	11.4756	11.8308	10.2
Nkiras1	13.0485	7.7561	5.86154	8
Psmd8	13.0485	11.3293	10.6769	9.46316
Smim29	13.0485	10.7683	12.7385	10.1684
Pik3r1	13.0388	8.18293	9.09231	19.7263
Fh	13.0097	7.31707	6.96923	7.17895
Caprin1	12.9903	10.3293	10.2154	9.12632
Wif1	12.9903	6.5	1.98462	2.02105
Adarb1	12.9806	7	10.6769	7.17895
Sirt5	12.9709	11.1829	10.4462	8.77895
Bclaf1-000175	12.9612	10.1829	12.9385	23.8211
Rpl22l1	12.9612	13.0854	12.8923	11.7895
Elovl4	12.9612	8.78049	11.4769	5.72632
Ctdspl-Golga4	12.9515	13.4634	19.8462	22.6105
Tnrc6a	12.9223	16.0366	18.2923	20.1263
Afdn	12.9223	19.0488	12.6154	29.7474
Gdap1	12.9223	8.87805	7.92308	9.70526
Rbm5	12.9029	17.939	25.5538	35.7158
LOC100911498	12.8932	11.8293	12.5385	29.7684
AABR07027870.1	12.8835	16.878	15.8769	9.94737
Mrpl42	12.8835	8.81707	5.67692	5.41053
Rps19bp1	12.8738	15.3293	8.69231	7.47368
Fbxo9	12.8544	11.0976	7.30769	12.4421
Tmem35a	12.8447	11.1585	10.1385	26.0947
Cds2	12.835	10.3537	11.4769	7.51579
Bmi1-Commd3	12.8252	17.2927	13.7385	14.3368
Dzank1	12.8252	9.76829	9.32308	11.8737
Trappc2l	12.8155	11.4878	13.1692	4.72632
Maf	12.8058	15.6463	13.1231	2.42105
Cmpk1	12.7961	13.2683	13.5077	5.56842
LOC102552369	12.7767	10.1829	11.5538	9.28421
Arnt2	12.767	20.8415	28.3846	9.38947
Ptpre	12.767	3.80488	2.63077	14.2211
Ctr9	12.7379	19.1341	15.1231	16.0421
Slc25a5	12.7184	7.58537	7.58462	5.51579
Slc7a14	12.7087	12.2073	18.3846	12.7789
Nap1l2	12.7087	8.53659	9.50769	4.92632
Otub1	12.699	13.122	15.6462	13.9895
Cyfip2	12.6893	11.3902	10.6154	10.3579
Coa3	12.6893	8.97561	10.2	6.07368
Zdhhc21	12.6893	8.7439	11.9385	13.8526
Smim14	12.6796	9.20732	10.4923	11.3684
Psmc2	12.6602	10.9634	9.23077	8.48421
Dgkg	12.6505	6.60976	6.30769	9.67368
Trim9	12.6117	8.32927	9.38462	13.0947
Cbx6	12.6117	13.8049	9.95385	7.90526
Vps29	12.6019	7.9878	9.81538	8.51579
Ppia	12.6019	14.0122	10.4	6.12632
Slitrk1	12.5922	22.8049	23.2769	12.5368
Ggnbp2	12.5825	11.5732	17.5385	23.3684
Nat8l	12.5825	7.65854	6.78462	7.03158
Nsd1	12.5825	12.1707	11.8923	16.6211
Gps1	12.5728	9.7561	16.0308	11.8632
Mrps34	12.5728	13.2195	10.9846	11.7579
Lrp11	12.5728	7.69512	9.04615	5.16842
Srsf2	12.5631	14.4756	14.9077	17.2421
Dusp8	12.5437	16.0976	10.9538	11.7053
GL.11587	12.534	12.6341	11.8462	9.58947
Fam49b	12.5243	9.5122	11.3077	5.13684
Hsph1	12.5146	10.8659	13.2308	22.1474
Ddx46	12.5146	14.9146	19.6769	26.0211
Ckap5	12.5049	12.4512	13.7692	18.6737
Tmem65	12.5049	8.23171	9.49231	2.88421
Ccni	12.4951	17.6951	12.8462	11.6526
Ptp4a2	12.4951	11.0366	11.3077	23.4842
Hdac9	12.4951	20.7317	31.3846	16.7053
Slc2a13	12.4854	11.3171	25.9692	10.7789
Selenos	12.466	9.03659	9.61538	7.33684
Slc35b1	12.4563	12.3537	11.8462	29.4737
Kcnk1	12.4563	2.58537	3.44615	10.4947
Cracd	12.4466	20.439	21.5846	16.8316
Grpel1	12.4466	9.47561	8.87692	6.73684
Appl1	12.4466	14.5976	10.5846	12.7263
Trappc8-B4galt6-Mapre2	12.4466	12.4634	16.2	12.6632
Zfp106	12.4272	8.04878	12.1692	10
Mrps35	12.4175	10.1585	9.56923	6.31579
Bdh1	12.4078	11.0732	8.72308	3.56842
Parp1	12.4078	11.2561	11.9538	14.3368
Anapc5	12.3883	14.1707	13.8615	10.2526
Jagn1	12.3883	11.939	11.1846	10.7895
Mdga2	12.3883	15.561	12.2615	19.3263
Lpgat1	12.3786	9.76829	7.38462	4.87368
Pde4d	12.3786	9.54878	8.61538	6.04211
Rbm8a	12.3592	15.3415	10.9692	10.7895
Ahcyl1	12.3592	10.9268	13.5538	8.48421
Laptm4a	12.3592	10.0488	9.69231	7.63158
Tmem47	12.3592	8.52439	6.84615	6.02105
Tsn	12.3495	16.6585	18.4615	10.2211
Glod4	12.3398	11.4634	9.10769	9.4
Prkce	12.3398	18.5	16.3538	23.7474
Ufsp2	12.3301	7.37805	11.4462	5.75789
Mrps24	12.3107	11.4634	8.56923	7.27368
Ergic2	12.3107	11.9024	14.4154	10.3895
Creg1	12.301	7.43902	23.1077	10.8316
Afg3l2	12.301	9.43902	12	8.48421
Sptssa-Eapp	12.301	11.5366	9.12308	7.91579
Rcn2	12.2913	16.8049	15.0615	8.50526
Tufm	12.2816	9.03659	10.7538	5.03158
Zfp706	12.2816	12.2195	9.4	10.5263
Sdf4	12.2816	8.21951	8.66154	4.13684
Gdi2	12.2718	12.9878	11.0923	17.9579
Arhgef9	12.2718	12.5244	8.69231	16.3474
Napa	12.2621	8.26829	10.6308	13.8105
Stx12	12.2621	13.8415	12.7077	9.02105
Cbarp	12.2621	13.3537	14.1385	16.1474
Hnrnpk	12.2524	14.939	15.9846	12.1684
Hs6st1	12.2524	7.82927	6.41538	11.0421
Ift20	12.2233	13.9268	11.7385	12.6947
LOC100912195	12.2233	23.2073	17.6308	14.7895
Lars	12.2233	13.5488	12.1538	13.1579
Slc32a1	12.2233	12.7317	11.7231	1.67368
Pum2	12.2233	16.4512	15.0462	23.3053
Actr1a	12.2136	11.1341	13.0154	8.26316
Klhl13	12.2136	10.3537	13.5846	2.93684
LOC288913	12.2039	11.9024	13.3846	9.24211
Mrps33	12.2039	14.5366	12.2769	9.70526
Cdc42bpa	12.1942	14.1341	17.0462	27.7053
Rell2	12.1942	7.15854	8.24615	5.96842
Eif3f	12.1845	8.39024	10.8923	9.83158
Cuta	12.1845	9.79268	14.1385	9.16842
Sox2	12.1845	22.5366	33.0154	4.77895
Hectd1	12.165	18.5732	15.6154	15.6316
Ppfia2	12.165	15.2317	18.2462	50.7789
Ncald	12.165	14.1463	6.13846	16.8526
Dzip3	12.1553	8.57317	9.89231	14.2421
Commd4	12.1553	11.2439	12.2	9.35789
Esrrg	12.1359	5.84146	6.43077	1.92632
Usp33	12.1359	17.4756	14.2769	22.0105
Fryl	12.1165	11.6463	14.5538	5.77895
Impa1	12.1165	12.5976	7.70769	5.71579
Msmo1	12.1068	17.2195	13.8615	16.8211
Eif4g3	12.1068	15	13.8462	18.5789
Rab10	12.1068	17.1463	14.0615	12.6105
Fam171b	12.0971	16.939	16.8769	15.5684
Uqcrc1	12.0874	8.62195	9.01538	5.50526
Stat3	12.068	10.6951	10.5231	4.09474
Disp2	12.068	9.29268	11.6923	8.55789
Tcap	12.0583	4.71951	3.70769	1.46316
Coprs	12.0583	13.5976	14.7692	5.67368
Mtch2	12.0583	12.8659	11.1692	13.2737
Eif4ebp3	12.0485	17.2439	21.5077	29.8
Kpnb1	12.0194	10.1951	15.8923	11.6
Wasf3	12.0194	7.47561	6.89231	5.6
Ptpn4	12.0097	8.36585	6.27692	5.93684
Rex1bd	12.0097	13.3415	9.36923	5.14737
Shc3	12.0097	11.6829	5.90769	17.6421
Zyg11b	12.0097	11.2683	11.0462	7.88421
Mrpl57	11.9903	12.2927	10.6769	6.57895
Acly	11.9515	20.8537	21.3231	12.8316
Celf4	11.932	22.5488	26.6615	24.6
Nr2f1	11.9029	9.02439	7.03077	8.90526
Mfsd12	11.9029	13.5488	12.1846	6.25263
Dnm3	11.8835	12.5	17.3385	10.6421
Dlat	11.8835	11.0122	8.32308	7.22105
Dcun1d5	11.8738	15.8415	12.1692	10.4211
Rundc3a	11.8641	10.4268	11.9538	16.6316
Cetn2	11.8641	11.3902	11.4154	9.64211
Tsc22d3	11.8544	8.42683	4.55385	3.14737
Rpn2	11.8252	13.8049	14.4	9.29474
Fam57b	11.8155	7.06098	8.49231	7.09474
Supt16h	11.8155	11.0244	13.8769	19.2526
Klf6	11.8155	15.2561	9.67692	6.85263
Glrb	11.8155	7.08537	4.93846	4.12632
Tnrc6b	11.8155	10.0366	13.4	18.1158
Ralgapa1	11.8058	11	10.5692	16.4421
Nsfl1c	11.7864	11.2439	9.92308	7.38947
Trappc5	11.7767	11.1829	14.2923	12.5579
Tmem38a	11.7573	6.89024	9.87692	9.42105
Phactr1	11.7573	15.1098	21.2462	7.50526
Rangap1	11.7476	14.5488	14.0769	13.0211
Cyp2b15-Atad1	11.7282	9.97561	9.38462	7.24211
2020-09-08	11.7184	12.5	10.4308	11.6526
Rpl34	11.7184	12.7561	13.2615	14.3368
Slirp	11.7184	8.86585	9.38462	6.92632
Psma2	11.7087	11.9512	10.2615	7.81053
Hmgcr	11.7087	12.2927	14.8923	18.0316
Zeb2	11.7087	17.2317	23.3538	16.7895
Ap3b2	11.699	17.3049	14.7846	20.3368
Cnih1	11.699	11.439	12.8923	6.75789
Klf12	11.699	10.6829	5.66154	4.75789
Ssb	11.6893	9.02439	10.9385	13.2842
Gnb1	11.6893	13.439	12.1077	6.12632
Selenoi	11.6893	14.4756	14.0308	10.5158
Tmem9b	11.6796	13.622	9.56923	8.04211
Hnrnpdl	11.6796	15.0122	11.0615	22.8421
Psmg3	11.6699	8.14634	8.73846	5.87368
Nifk	11.6699	9.23171	8.38462	13.4947
Lrpprc	11.6699	7.82927	12.5231	11.2105
Wdr83os	11.6602	11.1951	12.1231	7.17895
AABR07001382.1	11.6505	13.2073	16	25.3579
Fndc3a	11.6505	9.56098	6.8	14.6737
Eef1b2	11.6505	12.0976	11.0923	11.1158
AABR07007064.1	11.6408	5.71951	6.06154	5.4
Srsf11	11.6408	15.8659	12.9077	39.7158
Camsap2	11.6311	12.7927	11.4308	13.8632
Zcchc7	11.6311	12.7561	34.2615	22.6947
Hars	11.6214	8.92683	12.1692	9.90526
Grip1	11.6214	9.85366	17.8615	7.64211
Atp2b3	11.6214	10.8415	22.8308	13.4316
Ahsa1	11.6117	10.4268	8.18462	6.4
Ppme1	11.5825	12.939	11.5077	12.5368
Mapk1	11.5728	16.0854	11.2769	16.9263
Lrrc7	11.5728	11.878	15.3231	32.4842
Strn3	11.5728	11.5122	10.8308	19.4842
Slc9a7	11.5728	6.34146	6.43077	7.11579
Ptpra	11.5631	13.6951	10.8923	16.0632
Hnrnpa3	11.5534	11.2073	9.15385	10.0526
Kpna1	11.5437	12.9634	13.3538	18.8211
Fgf9	11.5437	6.95122	10.3077	3.16842
Ubqln2	11.5437	12.1341	14.6615	11.4
Rtraf	11.534	16.8659	17.1385	12.8421
Tm2d1	11.5243	8.81707	8.83077	8.54737
Ddit3	11.5243	6.93902	7.01538	4.13684
Mapk10	11.5146	11.1341	6.72308	7.66316
Psmd14	11.5146	10.5488	8.76923	8.90526
Rer1	11.5049	9.14634	10.2	7.15789
Cadps	11.4854	10.0488	18.1846	16.9158
Mmp16	11.4757	15.939	16.3231	7.01053
Hint2	11.466	7.81707	7.50769	6.38947
Ccser2	11.4563	8.12195	9.12308	6.65263
Psenen	11.4563	10.0732	13.7692	12.1684
Smarcc2	11.4466	18.8171	14.1538	23.3789
Sprn	11.4369	12.6829	17.0154	8.46316
1110008P14Rik	11.4369	9.97561	10.9077	6.09474
Commd1	11.4272	13.1341	8.83077	7.85263
Dpy30	11.4272	8.58537	7.73846	6.30526
Slc30a9	11.4175	11.1463	9.32308	6.10526
Pde4dip	11.4175	11.0122	12.3692	23.3263
Ncoa4	11.4078	12.9146	9.67692	10.0737
Smim10l1	11.4078	9.18293	11.2923	5.77895
Nol7	11.3981	11.1707	11.1538	15.0105
Cd59	11.3981	7.54878	9.61538	9.56842
Nrbp2	11.3981	14.5244	10.8462	17.0421
Rpl23a	11.3883	12.2195	11.5231	8.87368
Arpc2	11.3883	12.1098	8.67692	13.4947
Rtca	11.3786	10.7195	6.90769	3.35789
Gap43	11.3689	78.0854	106.092	80.9368
Reep1	11.3689	13.061	16.3692	7.54737
Amfr	11.3592	14.8049	12.4615	10.0947
Sort1	11.3592	9.03659	6.33846	10.8947
Aldoc	11.3495	10.2805	15.5077	4.32632
Ctbp1	11.3398	11.378	12.5231	10.4947
Zmat3	11.3301	8.46341	7.81538	3.90526
Msantd4	11.3301	10.7439	7.95385	5.36842
Srrm1	11.3204	13.0366	19.4154	24.4632
Stau2	11.3204	12.1951	10.9385	9.43158
Tmed2	11.301	9.89024	9.13846	9.15789
Mrpl27	11.2913	8.21951	9.61538	5.14737
Lamp1	11.2913	9.89024	12.3077	9.90526
Slc6a17	11.2718	9.06098	6	10.5474
Armcx3	11.2621	9.15854	10.4615	7.51579
Hspa13	11.2427	9.21951	12.6769	12.5263
Abcc5	11.233	15.3293	14.8308	15.5368
Gabrb3	11.2233	12.1951	15.0769	20.7053
Arfgef3	11.2233	13.4512	13.4308	20.7895
Ctnnd2	11.2233	10.0122	20.4615	8.93684
Clcn4	11.2039	6.76829	7.15385	3.43158
Sptbn2	11.1942	10.6341	11.7692	31.2842
Pdcd10	11.1845	11.8659	9.93846	6.58947
Pten	11.1748	11.3902	11.0769	7.91579
Tbca	11.1748	15.5	12.2	9.49474
Cdc27	11.165	6.37805	5.93846	5.28421
Mapre1	11.165	14.3049	14.4154	13.1684
Rimkla	11.165	8.93902	7.86154	3.68421
Eif4h	11.1456	12.4634	9.84615	12.1684
Wdr6.1	11.1359	13.2317	12.1692	8.74737
Ythdf2	11.1165	9.14634	11.3231	12.1053
Copz1	11.1068	12.122	14.5846	12.8105
Fyttd1	11.0971	11.6829	14.3846	24.1263
Sgpl1	11.0874	8.81707	12.7538	8.74737
Necap1	11.0874	10.2927	9.33846	8.53684
Osbpl8	11.0874	11.1098	8.13846	6.48421
Cd200	11.0777	15.3293	10.6923	9.6
Sec61g	11.0777	12.2317	11.0154	8.92632
Sorbs2	11.0777	6.65854	7.03077	12.7789
Eid1	11.068	13.7317	9.44615	18.5789
Mmd	11.0583	12.9146	10.4923	9.01053
Cmas	11.0583	10.6098	10.2462	6.69474
Arhgap20	11.0583	10.9878	7.87692	9
Crebbp	11.0485	14.8902	16.5692	25.6947
Ash1l	11.0485	11.6951	14.8462	24.2211
Sra1-Apbb3	11.0291	12.1341	11.4462	11.4842
Dynll1	11.0194	13.5976	10.8462	20.7789
AABR07018321.1	11.0194	7.45122	10.7231	7.83158
Mlf2	11.0194	10.5122	9.6	10.2737
Cep170b	11.0194	11.3049	12.7231	7.24211
Ciapin1	11	10.122	9.81538	3.36842
Supt5h	10.9903	10.1829	11.2462	16.1895
Fdx2	10.9903	10.9878	12.3077	10.5684
Klhl11	10.9806	9.42683	9.29231	9.23158
Pnpla8	10.9806	10	13.0923	14.6421
Cops3	10.9709	10.9512	9.64615	10.6947
Ubl3	10.9709	6.60976	7.16923	4.78947
Ppp2r5c	10.9709	8.65854	11.1692	16.3684
Bloc1s1	10.9709	11.2927	8.27692	8.41053
Nop58	10.9515	11.5122	13.2769	24.0737
Gaa	10.9417	9.76829	11.2462	9.04211
Ddrgk1	10.9417	12.561	15.4154	16.2211
Strap	10.9417	15.8293	8.8	10.2737
Cnpy2	10.9417	9.32927	10.2615	8.38947
Dynlt3	10.932	6.56098	5.75385	5.70526
Ptdss2	10.9223	11.9024	12.8923	7.49474
Ctsb	10.9126	9.62195	9.8	5.2
Pkia	10.9126	13	11.8615	7.2
Smim7	10.9029	8	11	7.71579
Reep2	10.9029	11.3659	13.2923	13.5474
Pcsk1	10.8932	3.08537	2.75385	5.48421
Paxx	10.8932	9.91463	12.8	7.57895
Clcn3	10.8835	11.6341	12.9231	8.54737
Srpk1	10.8835	10.0488	12.7692	8.71579
LOC102552810	10.8738	7.46341	1.6	1.91579
Rnf135-Psmd11	10.8738	9.23171	10.7846	11.1579
Golgb1	10.8544	14.6098	18.5077	32.4211
Pabpc1	10.8544	15.2439	11.1385	15.0211
Nceh1	10.8447	7.2439	6.32308	4.66316
Eif3g	10.835	12.561	7.75385	8.64211
Nktr	10.8252	15.7927	19.1385	32.4421
Lgalsl	10.8155	8.53659	7.06154	10.3789
Arf4	10.8155	10.1829	10.3385	11.9684
Usp11	10.8155	13.939	13.1692	10.3263
Lrpap1	10.8058	8.4878	13.1692	10.6421
Vps4a	10.7864	11.0244	9	11.8211
Senp6	10.7864	9.4878	11.0615	14.7368
Dek	10.7767	6.59756	3.95385	6.35789
Rap1gap	10.7767	7.2561	7.10769	7.62105
Ppp2r5e	10.7767	8.59756	8.76923	13.0526
Samd12	10.7767	12.878	10.7692	10.0105
Cdh11	10.767	10.9024	12.5231	5.82105
Daam1	10.767	14.0854	17.4769	12.3474
Pcmtd1	10.7573	9.14634	8.4	11.7579
Mcrip1	10.7476	10.878	7.55385	6.02105
Ncor1	10.7476	14.7073	19.4769	31.9789
Rammet	10.7476	8.40244	9.56923	5.05263
Arl6ip4	10.7476	11.7073	10.9846	6.78947
AC109958.1	10.7379	11.5976	11.7846	13.1368
Ptges3	10.7184	10.7683	9.43077	10.1053
Ube2l3	10.7087	8.45122	8.44615	8.55789
Wdr37	10.7087	11.8049	9.30769	10.9789
Ufm1	10.7087	9.45122	12.4615	4.52632
Ano4	10.7087	9.29268	8.76923	5.73684
Madd	10.699	9	8.81538	8.28421
Crk	10.6893	7.58537	7.01538	8.42105
Gabbr1-148689	10.6893	13.1951	10.9385	8.23158
Ube3c	10.6893	8.92683	14.5231	11.6632
Higd2a	10.6796	9.08537	8.66154	6.38947
Fdps-122885	10.6699	13.5122	9.4	6
Ubl5	10.6699	9.41463	5.41538	8.28421
Rpl21	10.6602	10.2317	8.29231	8.91579
Wars	10.6408	11.2439	10.0308	5.66316
Denr	10.6311	12.1585	10.7692	11.1053
Anapc2	10.6311	10	7.26154	3.86316
Fkbp4	10.6311	9.08537	8.23077	5.8
Tmem59	10.6311	9.63415	12.2154	7.50526
Ccdc47	10.6214	8.4878	10	12.1789
AABR07021988.1	10.6214	12.7195	9.96923	11.5895
Thoc7	10.6214	7.7439	7.72308	8.83158
Aggf1	10.6214	8.17073	8.15385	11.5789
Ndufb3	10.6117	9.14634	9.10769	6.58947
Fam168a	10.6019	8.80488	12.9846	16.3579
Hs3st1	10.6019	11.7195	16.8462	4.75789
Bmyc	10.5922	12.9634	10.4	7.01053
Eif5	10.5922	9.41463	11.1231	6.78947
Glud1	10.5728	7.59756	6.72308	4.37895
Ppdpf	10.5534	12.8537	13.1846	9.18947
Ubxn1	10.534	11.878	9.64615	7.33684
Taf1d	10.534	18.5	16.8154	42.8421
Adgrb3	10.534	11.9268	10.7077	11.6632
Cct6a	10.5243	11.6463	11.3231	11.9789
Hadhb	10.5243	6.69512	7.55385	6.97895
Nlgn3	10.5243	15.9512	11.4769	11.4105
Rwdd1	10.5146	11.0244	11.0308	11.8632
Pde10a	10.5049	10.439	10	33.9895
Dnajc10	10.5049	10.5732	10.8769	12.0947
Smc1a	10.5049	13.2683	15.9538	24.5579
Copb1	10.4854	12.5	8.52308	12.7368
Apoo	10.4854	6.5	6.2	3.82105
Nap1l3	10.4757	12.5244	12.0615	4.94737
Tcaf1	10.466	9.15854	9.93846	10.1579
Mtx2	10.4466	9.07317	10.1385	4.67368
Rad23b	10.4369	10.7195	9.8	8.69474
Pip4p1	10.4272	9.45122	9.92308	5.94737
Micu3	10.4272	9.60976	12.4769	8.51579
Csnk2b	10.4272	11.7195	8.36923	10.6211
Rps3a	10.4272	12.7073	12.7385	10.7474
Frrs1l	10.4272	11.122	9.70769	12.4632
Krit1	10.4078	7.90244	10.3538	12.1579
Chordc1	10.4078	7.41463	7.4	8.74737
Tm7sf2	10.3981	9.34146	14.4154	7.73684
Mrpl52	10.3981	10.5	15.4462	7
Rab4a	10.3981	8.45122	8.46154	5.46316
Slc4a3	10.3981	10.8049	11.0154	12.1053
Eif3c-U6	10.3883	8.5122	9.56923	6.16842
Bmpr2	10.3883	10.622	11.9538	9.97895
Ivd	10.3786	9.80488	14.4308	5.96842
LOC100125362	10.3786	12.0366	10.5846	23.1579
Dpysl4	10.3592	11.8659	14.2308	4.76842
Vamp7	10.3495	10.1707	8.67692	7.16842
Gfod1	10.3495	6.91463	6.15385	3.96842
Gabbr1-148687	10.3495	13.8659	13.0769	11.0737
Pdpk1	10.3398	10.2317	10.5538	10.2737
Sdf2	10.3398	8.07317	11.8154	10.0421
Ncan	10.3398	14.8659	9.55385	11.4842
Aldh7a1	10.3398	9.23171	5.44615	2.71579
Smpd1	10.3301	7.79268	7.01538	5.77895
Gmpr	10.3301	2.63415	2.29231	4.86316
Ppt1	10.3301	8.09756	9.89231	7.49474
Fam92a	10.3301	8.40244	8.92308	10.2
Klhdc3	10.3301	9.54878	11.9692	11.4947
Ctsf	10.3107	7.12195	10.1077	3.63158
Bpnt1	10.3107	11.2073	17.0308	6.27368
Epb41l3	10.3107	6.04878	5.23077	3.44211
Taldo1	10.301	12.1951	8.66154	12.9053
Rbm26	10.301	12.0366	12.7385	22.3789
Tbc1d9	10.301	11.1951	13.1538	5.50526
Mapk8ip2	10.301	8.90244	9.78462	11.8421
Vsnl1	10.2913	15.3171	6.87692	16.3895
Luc7l	10.2816	12.878	13.4615	23.1474
Snx27	10.2816	8.80488	7.07692	8.95789
Gm13889	10.2816	4.17073	6.36923	4.68421
Grik1	10.2524	37.1341	23.1385	6.31579
Arpc5l	10.2524	11.6341	11.7538	9.73684
Glyr1	10.2427	10.9634	11.6923	10.5158
Zfp207-Rnf135	10.2427	11.8171	12.9385	15.1684
Iqsec3	10.233	9.21951	12.0462	16.1789
Chchd10	10.2233	7.02439	6.09231	5.46316
Ubr3	10.2233	11.5732	9.8	18.7368
Dhcr24	10.2233	11.5366	9.95385	7.93684
Zzef1	10.2136	18.6341	14.0769	12.6526
Sfr1	10.2136	12.8415	10.5231	9.12632
Ldhal6b-Tmem242	10.2136	7.47561	8.61538	4.44211
Clpb	10.2039	10.378	10.2769	4.15789
Cars	10.2039	13.061	12.6154	13.8526
Prpf3-Mrps21	10.2039	9.93902	11.6	11.5684
Mcrip2	10.1942	4.21951	6.27692	1.72632
Abr	10.1942	9.47561	7.93846	13.5368
Cwf19l2	10.1845	10.3537	10.4462	15.7684
Etnk1	10.1748	7.29268	6.46154	7.16842
Tsg101	10.165	11.6707	10.7692	11.5789
Rpl27	10.1553	11.9756	11.1846	9.78947
Plekho1	10.1553	7.79268	7.66154	6.51579
Dnaja3	10.1456	8.20732	8.66154	6.87368
Pdzd8	10.1456	7.69512	10.9692	11.6947
Esd	10.1359	11.5976	12.3538	9.34737
Itpa	10.1359	8.86585	8.64615	7.2
Tpp2	10.1359	7.69512	5.66154	8.92632
Nucb1	10.1165	6.43902	7.92308	3.48421
Tp53bp1	10.1165	12.1341	14.3077	9.6
Tac1	10.1165	2.03659	1.07692	1.41053
Alkbh7	10.1068	10.3293	9.92308	6.14737
Slc25a39	10.0971	8.42683	8.58462	5.16842
Polr2g	10.0971	8.10976	8.87692	13
Ykt6	10.0971	9.31707	7.6	4.07368
Nutf2	10.0971	11.2439	9.16923	8.70526
Samm50	10.0971	7.63415	8.63077	9.95789
Abi2	10.0971	12.6463	9.52308	12.9158
Hmox2	10.0874	7.28049	8.06154	5.50526
Slc39a11-Fam104a	10.0777	7.5122	9.26154	7.70526
Eif4g2	10.0777	12.3171	11.7538	8.37895
Astn1	10.068	7.02439	8.8	8.66316
Pik3ca	10.0583	10.4512	10.3538	7.06316
Il6st	10.0485	6.47561	6.24615	6.35789
Plcb1	10.0485	16.4146	10.5385	17.1579
Ngrn	10.0388	11.9024	12.0769	7.78947
Msrb1	10.0291	9.28049	5.86154	5.67368
Tp53inp2	10.0194	11.6585	5.86154	6.67368
Nub1	10.0194	8.97561	8.73846	10.1789
Tpm3	10.0097	12.061	11.4769	13.3053
Timm9	9.99029	9.07317	8.92308	8.71579
Psmd13	9.98058	9.7561	10.8462	10.0211
Arl3	9.98058	8.81707	8.83077	13.4737
Lin7b	9.97087	11.1585	4.69231	5.22105
Mprip	9.96117	9.53659	11.4	14.9789
Hpf1	9.96117	6.81707	9.66154	10.0737
Abhd8	9.94175	8.82927	8.70769	7.73684
Ryr2	9.94175	14.5	18.1385	42.1368
AABR07060833.1	9.94175	21.4634	37.6462	1.55789
Gcc2	9.93204	13.4512	7.2	12.1579
Reps2	9.93204	5.5122	8.33846	3.09474
Igf1	9.92233	13.7683	18	2.30526
Samd8	9.91262	15.6707	11.5692	15.8
Fem1a	9.91262	9.2439	11.0615	11.9684
Purg	9.90291	10.7195	10.5846	8.4
Ube2n	9.8932	6.91463	8.81538	4.86316
Usp32	9.8835	13.2561	7.93846	9.98947
Scn2a	9.87379	12.6341	12.7385	31.7579
Tmem33	9.86408	8.54878	8.72308	5.21053
Nop16	9.86408	6.93902	8.15385	5.72632
Fubp1	9.85437	13.0488	13.3538	19.2316
Map7d1	9.85437	8.79268	8.64615	7.30526
Kcnk9	9.85437	10.1829	13.2769	6.08421
Tmem256	9.83495	10.2195	10.6	6.11579
Mrps26	9.83495	7.79268	9.49231	7.53684
Asnsd1	9.83495	7.53659	6.66154	5.85263
Ccdc127	9.82524	9.21951	7.55385	5.25263
Rbfox1	9.81553	10.9024	5.15385	15.6526
Bud31-Cyp3a2	9.81553	7.54878	7.49231	7.08421
Syt13	9.81553	6.10976	8.33846	3.45263
Ndufs5	9.81553	7.5	8.86154	5.94737
Pink1-AABR07050212.1	9.80583	5.69512	4.43077	2.82105
Grsf1	9.79612	5.21951	7.87692	3.70526
Nus1	9.79612	6.36585	8.30769	8.50526
Grin1	9.79612	11.5488	9.21538	12.0526
Emc2	9.79612	7.10976	5.89231	5.62105
Habp4	9.78641	5.2561	6.50769	3.49474
Aprt	9.78641	11.9756	13.1692	7.68421
Sh3bgrl3	9.78641	14.0976	14.8615	9.87368
Ranbp1	9.7767	7.45122	10.2769	8.82105
Rpl7	9.7767	9.80488	11.3385	11.4105
Shd	9.7767	6.93902	6.75385	2.11579
Ublcp1	9.76699	7.76829	7.52308	8.03158
Zfp637	9.76699	9.35366	7.2	8.42105
Phb2	9.76699	6.15854	7.84615	4.67368
Tmem229b	9.76699	5.65854	11.1077	3.90526
Nsa2	9.75728	14.1585	8.32308	11.0526
Mroh1	9.75728	11.0244	8.46154	7.53684
Slc35g2	9.75728	4.4878	8.81538	1.56842
Cttnbp2	9.74757	16.3293	11.6154	35.7789
Sdhaf2	9.73786	7.58537	9.4	7.04211
Map9	9.73786	15.0244	10.7231	20.2
Vapa	9.72816	11.7439	12.2769	11.9474
Dgkd	9.72816	10.5854	8.66154	13.2526
R3hdm1	9.70874	18.7439	12.8615	32.7263
Mat2b	9.69903	10.1829	5.38462	11.0421
Mtmr9	9.69903	10.5244	9.58462	6.24211
Serf1	9.69903	18.1829	13.6	6.85263
Ubqln1	9.68932	6.32927	6.52308	6.02105
Cdk5	9.67961	8.71951	9.27692	5.56842
GL.14817-GL.18196	9.6699	9.85366	11.8615	11.0737
P4hb	9.66019	10.3659	10.5231	8.34737
Atrn	9.66019	10.1951	9.92308	10.1053
Ate1	9.63107	11.939	9.23077	14.8
LOC690617	9.63107	7.63415	10.0615	5.51579
Pa2g4	9.63107	9.09756	11.3692	14.1684
Tas2r143	9.63107	8.09756	4.78462	14.0105
Cox20	9.62136	9.71951	8.83077	10.0105
Dmxl1	9.62136	15.7073	11.6	39.4947
Zdhhc5	9.62136	9.0122	9.43077	9.23158
Tspan13	9.62136	13.6585	20.2308	17.9158
Trip12	9.62136	13.4878	14.6	17.6842
Fis1	9.61165	9.06098	5.56923	6.76842
Slc5a6	9.61165	8.82927	7.26154	2.77895
Rrbp1	9.60194	13.3902	13.5077	12.8737
Klhdc2	9.60194	8.20732	11.4615	6.22105
Khdrbs1	9.59223	8.89024	8.56923	11.4105
Gtf2i	9.58252	12.6951	9.6	13.6
Rit1	9.57282	10.1829	10.4462	6.97895
Eif5a	9.56311	8.56098	8.6	6.95789
Exoc3	9.56311	11.3537	8.12308	12.3053
Fam32a	9.56311	8.15854	6.73846	8.21053
Tmem167a	9.56311	7.81707	11.6308	5.41053
Card9-Dnlz	9.5534	7.34146	10.6923	5
Ciao2b	9.54369	9.70732	7.56923	4.6
Zfp638	9.54369	9.46341	12.0769	15.4
Efr3a	9.53398	6.78049	4.47692	6.49474
Uhrf1bp1l	9.53398	8.97561	7.95385	8.18947
Bzw1	9.53398	8.28049	8.06154	5.01053
Rab2b	9.52427	9.07317	8.47692	4.54737
Usp29	9.52427	12.0976	10.2154	12.4947
Gabrg3	9.51456	16.2317	36.1692	7.98947
Tmem183a	9.51456	11.9878	12.9692	9.63158
Mctp1	9.51456	11.0976	14.2462	18.7789
Naca	9.50485	9.36585	7.92308	10.0842
Usp15	9.50485	10.6341	8.55385	11.0737
Tusc2	9.50485	7.57317	10.4923	6.85263
Arhgef4	9.50485	7.9878	7.63077	9.68421
Actr1b	9.50485	8.60976	9.29231	7.27368
Kctd8	9.49515	6.71951	4.43077	1.35789
Dph3	9.49515	11.1341	10.4923	10.4842
Atp2c1	9.49515	10.0122	7.95385	10.4316
Ube2ql1	9.47573	11	9.8	8.26316
Sacs	9.47573	6.45122	10.2462	9.65263
Cnot4	9.47573	8.73171	10.0462	20.7474
Med13	9.45631	14.5488	9.92308	16.6947
Cops6-Zscan21	9.45631	8.86585	10.2308	7.34737
Cx3cl1	9.45631	5.70732	5.8	11.1789
Adgrl1	9.45631	11	9.83077	17.9368
1500011B03Rik	9.4466	9.30488	16.4769	8.32632
Eef1e1-Bloc1s5	9.4466	13.9146	9.56923	5.04211
Tcerg1	9.4466	13.5366	11.5231	29.0211
Zbtb4	9.43689	7.47561	8.58462	9.26316
Pnpo	9.42718	7.30488	7.63077	2.70526
Nolc1	9.42718	7.10976	9.01538	9.36842
Hectd4	9.41748	9.91463	11.2308	9.07368
Gbf1	9.41748	7.81707	9.55385	10
Washc2c	9.41748	6.43902	9.47692	13.5474
Ptdss1	9.41748	8.59756	11.3385	9.69474
Anapc13	9.41748	8.79268	8.6	9.33684
Mrpl3	9.41748	8.08537	4.92308	4.21053
Mrpl55	9.40777	13.3415	12.2769	9.22105
Mrps18c	9.40777	7.92683	7.89231	7.33684
Micu2	9.40777	6.53659	8.90769	8.74737
Nudt21	9.40777	11.4512	8.01538	7.84211
Gripap1	9.40777	11.7195	10.0308	11.6526
Tmem70	9.39806	5.57317	4.52308	2.46316
2020-09-05	9.38835	14.9634	17.0769	19.6105
Pds5b	9.38835	12.3293	10.1846	8.71579
Ndufv3-148199	9.38835	7.59756	9.83077	6.75789
Top1	9.38835	12.8049	12.4308	23.2526
U2surp	9.37864	12.8902	14.5231	20.4421
Mrps7	9.36893	7.7561	7.6	4.75789
Hdgf	9.36893	9.37805	11.5231	7.82105
Pls3	9.36893	9.41463	15.6769	2.41053
Praf2	9.36893	12.6585	8.81538	6.03158
Cebpz	9.35922	8.79268	9.10769	12.1053
Cox16	9.34951	7.21951	8.55385	4.86316
Ost4	9.34951	13.3537	11.4769	6.92632
AABR07041972.1	9.34951	9.76829	14.3385	10.4737
Tomm70	9.33981	9.03659	9.01538	6.61053
Megf9	9.33981	7.35366	5.55385	6.38947
LOC691807	9.3301	7.59756	6.49231	3.70526
Hs6st2	9.32039	5.35366	9.56923	2.67368
Mark1	9.31068	13.9512	11.2462	8.67368
Micu1	9.30097	5.34146	4.2	8.74737
Tpgs1	9.30097	8.43902	8.43077	9.77895
Bptf	9.29126	13.6829	11.4923	24.2632
Ppm1b	9.29126	7.41463	9.43077	6.22105
Chpf	9.29126	6.63415	6.43077	4.32632
Prdx3	9.28155	9.67073	6.35385	3.66316
Ubap2l	9.28155	8.28049	8.41538	11.3474
Ap1g1	9.27184	8.5	10.4615	7.68421
Pacsin1	9.27184	6.02439	7.73846	13.1263
Cct2	9.27184	9.46341	7.98462	7.16842
Prps1	9.27184	10.1585	9.64615	7.69474
Ppp3r1	9.25243	6.47561	6.83077	7.98947
Asap1	9.25243	13.4512	12.8769	6.35789
Yaf2	9.25243	6.71951	7.63077	6.83158
Wdr61	9.25243	6.32927	10.6615	8.09474
Kif21a	9.24272	18.622	18.9385	25.9368
Asphd1	9.23301	8.35366	11.5077	7.95789
Elavl4	9.23301	17.6463	22.6923	5.77895
Fam98a	9.23301	8.64634	8.41538	4.31579
Myt1l	9.23301	10.2317	20.7692	33.2211
Snrpd2	9.2233	7.46341	8.64615	9.65263
Ankrd34b	9.21359	3	3.87692	1.98947
Ubr4	9.21359	8.76829	7.84615	9.12632
Ppp2r2a	9.20388	10.5488	13.0769	15.9053
Ssr1	9.20388	9.02439	8.53846	10.9053
Cdo1	9.20388	13.1098	14.1231	5.54737
Cul1	9.20388	8.9878	7.75385	8.01053
Mtfp1	9.19417	5.92683	5.03077	2.13684
Tmem246	9.19417	10	9.2	3.75789
Mpp6	9.18447	8.2561	3.8	6.98947
Usp22	9.16505	10.7927	8.76923	10
Ipo5	9.16505	7.30488	5.4	6.21053
Ssna1	9.16505	6.45122	6.49231	6.69474
Phb	9.15534	6.23171	8.07692	5.24211
Agl	9.15534	8.15854	10.3692	3.88421
Cpsf6	9.15534	12.7317	11.3231	11.4842
Mrpl16	9.14563	7.69512	4.8	4.45263
Scn2b	9.14563	4.76829	5.6	5.66316
Iars	9.13592	7	5.6	6.14737
Fam177a1	9.12621	11.5854	7.70769	6.23158
Ndufb4	9.1068	9.59756	9.47692	6.08421
Slc45a1	9.1068	7.9878	7.70769	4.47368
Arl1	9.1068	10.8415	8.6	8.25263
Med10	9.09709	7.34146	8.96923	5.21053
Dpp6	9.09709	4.93902	9.29231	13.0211
Hif1a	9.09709	7.70732	6.21538	11.8105
LOC102551133	9.09709	15.6098	15.2154	7.15789
Timm10b	9.08738	6.73171	10.5077	3.26316
Fbxo21	9.06796	10.9146	9.72308	8.22105
Tmem14c	9.06796	7.7439	8.29231	5.25263
Uso1	9.05825	8.12195	6.36923	8.17895
Rock1	9.04854	16.3415	30.3846	69.9684
Rbis	9.04854	7.97561	8.56923	5.64211
Dpp10	9.03883	8.79268	11.5692	3.29474
Mrpl51	9.01942	6.81707	7.27692	3
Fam84a	9.01942	7.59756	10.2923	1.93684
Ptpn5	9.00971	6.79268	6.6	17.2105
Fus	9.00971	10.9634	10.5385	11.5684
Eif3b	9.00971	8.5	7.26154	9.49474
Rbm18	9.00971	5.97561	7.07692	5.12632
Mrps16	9	9.59756	5.47692	7.74737
Abhd12	9	4.82927	6.23077	4.93684
Slc4a10	9	8.90244	9.49231	21.0632
Dnajb2	9	7.92683	7.46154	3.97895
Metap2	8.99029	7.03659	8.52308	9.88421
Foxn3	8.98058	9.45122	9.13846	3.15789
Arl16	8.97087	7.18293	9.69231	5.51579
Mesd	8.97087	8.87805	7.70769	8.67368
Adar	8.97087	8.86585	7.69231	7.77895
Tmem127	8.97087	7.46341	7.43077	4.14737
Vcpip1	8.97087	6.64634	8.16923	8.63158
Rgs17	8.96117	7.65854	8.58462	3.54737
Znrf1	8.96117	7.56098	7.64615	13.2632
B3gat3	8.95146	7.31707	8.76923	5.17895
Elovl5	8.95146	9.79268	10.0769	4
Acap2	8.94175	10.7927	9.90769	12.8421
Rgs10	8.93204	20.7195	30.4769	8.38947
Tmed7	8.93204	7.13415	7.76923	9.77895
Hint1	8.92233	9.58537	8.56923	5.81053
Ylpm1	8.92233	11.7683	14.1846	22.9053
Eif3d	8.92233	7.17073	7.96923	8.65263
Ddb1	8.91262	9.67073	6.90769	6.75789
Atp1b3	8.91262	6.59756	6.8	4.17895
Wdr6.2	8.91262	6.30488	7.78462	9.49474
Klhl24	8.90291	10.9634	8.26154	7.47368
Vstm2b	8.90291	9.12195	12.0615	2.27368
Nacc2	8.90291	8.07317	8.41538	1.84211
Far1	8.8932	7.57317	8.44615	8.16842
Sys1	8.8932	9.2561	8.23077	10.0211
Rnps1	8.8835	10	11.6769	9.82105
Ccdc124	8.8835	6.70732	9.93846	7.12632
Sh3glb2	8.87379	10.4512	11.8308	13.4211
Ahcyl2	8.87379	4.36585	4.53846	9.36842
Sel1l	8.87379	6.62195	7.52308	5.24211
Copg1	8.86408	10.0732	11.1231	7.37895
Tdg	8.86408	8.58537	8.61538	12.0105
Tmbim4	8.86408	8.03659	7.87692	11.8211
Pdgfa	8.85437	12.5	11.3077	16.5368
Prrc2b	8.85437	9.73171	9.13846	9.29474
Vps36	8.84466	7.69512	6.29231	3.14737
Sgta	8.84466	10.9878	9.06154	8.05263
Tfg	8.83495	9.30488	6.63077	6.28421
Fdft1	8.83495	9.67073	9.2	10.3368
Tmem18	8.82524	4.40244	4.26154	4.2
Alkal2	8.81553	1.21951	1.27692	2.50526
Fam126b	8.81553	8.45122	7.66154	10.4316
Jakmip1	8.80583	9.87805	12.4308	10.1474
Cdadc1	8.80583	5.80488	7	3.8
Aimp1	8.80583	8.96341	9.26154	10.6842
Cdk5r1-Rnf135	8.79612	18.6951	14.4308	21.5579
Gdf11	8.79612	5.17073	5.66154	3.35789
Arid1b	8.7767	10.2195	11.4923	8.2
Papola	8.7767	11.2561	6.38462	10.2526
Pycr1	8.76699	4.73171	4.78462	3.70526
Zrsr1	8.76699	7.73171	10.1385	10.6947
Jund	8.76699	11.122	7.41538	7.62105
Psmc4	8.76699	6.09756	7.29231	6.47368
Gapvd1	8.76699	7.73171	11.6	9.15789
Zfc3h1	8.76699	10.7683	13.5846	19.2105
Apex1	8.75728	9.56098	8.95385	8.30526
Ago2	8.75728	8.26829	11.9385	15.6211
Pick1	8.75728	7.0122	8.53846	6.02105
Fam81a	8.75728	5.26829	4.29231	11.8421
Phf20	8.74757	9.19512	8.86154	15.9368
Adipor2	8.74757	9.09756	8.46154	7.02105
B3gat1	8.74757	12.3293	17.3846	21.5263
Safb	8.74757	9.5	12.4615	14.7263
AABR07041096.1	8.74757	10.9268	8.15385	13.7263
Chd2	8.73786	13.9756	12.2308	25.3789
Mbnl2	8.73786	7.19512	7.23077	8.8
Pfdn4	8.72816	9.34146	8.36923	5.51579
Rpl10	8.71845	10.1585	10.6923	7.67368
Ubfd1	8.70874	10.2805	9.83077	4.71579
Smim37-Nphp1	8.70874	10.8293	8.56923	11.0211
Mgll	8.70874	17.3293	14.2615	7.25263
Fam3c	8.70874	9.80488	9.67692	5.72632
Atl1	8.70874	11.7561	11.7231	13.9263
Tex264	8.70874	8.46341	8.52308	5.09474
AC109096.1	8.69903	6.65854	8.92308	5.82105
Wnk1	8.69903	10.9146	15.8923	13.2211
Zfp629	8.68932	8.35366	8.73846	12.9053
Cops2	8.68932	6.79268	5.64615	6.09474
Ap3s2	8.67961	6.84146	6.21538	4.28421
Mrps28	8.67961	5.41463	4.93846	2.96842
Enho	8.67961	8.18293	12.8462	5.27368
Ccng1	8.6699	7.10976	4.58462	7.34737
Scand1	8.6699	9.18293	7.38462	9.73684
Snrnp27	8.6699	7.39024	6.55385	13.2842
Mindy2	8.6699	14.939	12.6769	5.84211
Upf3b	8.6699	8.60976	12.0308	18.2211
Lmbrd1	8.66019	9.36585	10.2154	13.5895
Thoc2	8.66019	6.52439	9.06154	21.1579
Wdr33	8.65049	6.43902	8.47692	9.91579
Trmt112	8.64078	12.2317	15.3538	9.34737
Slc39a14	8.64078	5.73171	3	5.88421
Chmp2b	8.63107	10.2439	8.13846	5.11579
Malsu1	8.63107	6.90244	6.66154	5.85263
Tulp4	8.62136	12.8537	8.92308	14.6105
Rasgrf2	8.62136	6.37805	23.0615	5.90526
Rc3h2	8.62136	9.28049	11.6154	15.1895
Cadm2	8.61165	13.5976	13.1385	8.42105
Dgkz	8.61165	9.08537	11.9077	12.5263
Hadha	8.61165	6.04878	6.67692	6.63158
Desi1-Nhp2l1	8.61165	10.3902	7.36923	7.88421
Adamts8	8.61165	1.56098	1.38462	1.12632
Psmd3	8.60194	9.15854	7.98462	6.74737
Gstp1	8.60194	7.78049	8.98462	3.14737
Ap2s1	8.60194	9.73171	6	6.18947
2020-03-06	8.60194	10.9268	6.93846	10.7684
Secisbp2l	8.60194	7.64634	7.6	10.9368
Lysmd2	8.60194	5.23171	6.73846	4.34737
Zfp148	8.59223	6.89024	10.9846	13.1368
Tmem147	8.59223	6.92683	7.18462	6.02105
Pdia3	8.59223	7.69512	9.27692	10.3895
Eps15	8.59223	12.061	10.1846	11.9368
Hnrnph1	8.58252	11.5	10.6	10.6947
Larp4b	8.58252	7.63415	7.07692	6.53684
Dip2c	8.58252	8.70732	7.64615	15.5895
Znhit6	8.58252	7.12195	7.21538	9.41053
R3hdm2	8.57282	9	6.81538	12.9789
Rbm3	8.57282	8.37805	7.07692	8.63158
Ap1s2	8.57282	9.91463	7.32308	4.04211
Rbbp6	8.56311	9.45122	10.8	22.8316
Eif2ak1	8.56311	5.36585	11.2769	10.1053
Mrps14	8.56311	10.1707	8.21538	6.57895
Polr3d	8.56311	7.82927	5.93846	8.63158
Eny2	8.56311	7.45122	7.50769	6.18947
Fbxl16	8.54369	6.12195	8.67692	12.3053
Rab18	8.53398	10.3415	8.30769	4.43158
Slc25a46	8.53398	5.87805	6.69231	5.03158
Slc24a3	8.53398	7.37805	6.16923	8.13684
Msl3	8.53398	7.91463	11.4154	7.26316
Fkbp8	8.52427	8.03659	8.78462	8.85263
Pgrmc1	8.52427	13.4024	15.8769	12.1684
Dgcr6	8.51456	8.80488	12.2769	9.75789
Phax	8.51456	7.06098	8.75385	12.2316
Mfap1a	8.51456	8.84146	9.47692	13.6526
Snph	8.51456	4.69512	5.6	3.35789
Smarca2	8.50485	20.8659	19.0923	21.8421
Trip11	8.50485	10.9512	7.50769	16.6316
Retreg2	8.50485	9.32927	11.6308	5.34737
Svop	8.49515	10.8902	7.76923	8.03158
Entpd4	8.49515	6.47561	7.50769	7.47368
Gpr162	8.49515	9.78049	7.52308	11.3579
Plaa	8.49515	10.9634	6.55385	5.92632
Dock4	8.49515	10.9512	3.12308	23.8526
AABR07019061.1	8.47573	7.9878	6.81538	5.71579
Herpud1	8.47573	7.36585	6.10769	2.93684
Sar1a	8.47573	11.4512	8.15385	7.07368
Ankh	8.47573	5.34146	5.36923	12.1053
Vmp1	8.46602	5	5.50769	4.84211
Gcsh	8.46602	4.45122	5.72308	2.34737
Rabgap1	8.46602	8.84146	5.81538	9.61053
2020-09-03	8.46602	8.92683	10.5846	18.2421
Emc6	8.45631	6.62195	6.29231	5.28421
Nsd3	8.45631	10.4146	13.2615	11.5579
Rtl8a	8.45631	7.53659	9.07692	6.05263
Cycs	8.4466	5.21951	5.49231	4.13684
Mtfr1l	8.4466	6.36585	6.16923	3.31579
Abhd2	8.43689	4.2561	3.10769	2.87368
Lcmt1	8.43689	11.4634	8.30769	9.88421
Rnf10	8.43689	9.02439	9.89231	7.71579
Mrps18b	8.43689	5.12195	6.38462	6.42105
Ubac1	8.43689	6.89024	6.12308	4.32632
Mrpl58	8.42718	7.26829	6.83077	4.62105
Ifrd1	8.42718	6.04878	4.66154	6.70526
Scarb2	8.41748	7.84146	7.35385	6.89474
Pcyt2	8.40777	8.93902	8.01538	10.9368
mrpl24	8.40777	6.65854	8.07692	3.76842
Inpp5j	8.39806	6.12195	2.98462	4.68421
Ccdc25	8.39806	6.53659	9.84615	9.38947
Stard3nl	8.38835	7.31707	8.33846	5.89474
Hbs1l	8.37864	5.2439	7.56923	8.10526
Zc3h13	8.37864	10.6585	16.4615	25.5789
B230219D22Rik	8.37864	13.3171	11.2615	11.7684
Tnpo3	8.37864	7.43902	6.67692	7.91579
Gla	8.37864	5.13415	7.04615	3.49474
Churc1	8.36893	7.70732	7.98462	8.57895
Clpp	8.36893	6.96341	7.06154	5.41053
Ogt	8.36893	10.2195	13.6154	10.9895
0610010F05Rik	8.35922	8.59756	9.46154	6.41053
Ncoa1	8.35922	8.20732	10.7231	13.8
Arl4c	8.35922	9.69512	11.3385	3.06316
Smg1	8.34951	9.19512	9.35385	10.5684
Atf6	8.34951	4.69512	4.6	5.10526
Nudt19	8.34951	5.87805	6.89231	3.18947
Cplx2	8.33981	34.2439	85.2308	25.2421
Naa35	8.33981	7.35366	7.66154	10.3263
Dnajb6	8.33981	7.03659	9.26154	9.2
Cnrip1	8.3301	10.5854	10.8462	15.5579
Uba5	8.3301	5.47561	6.73846	5.05263
Trak2	8.32039	7.63415	5.76923	4.64211
Abcf3	8.31068	5.08537	5.15385	5.45263
Rac1	8.31068	10.6707	9.92308	10.4526
Mrpl18	8.31068	4.23171	4.41538	5.41053
Prkar2a	8.31068	9.39024	10.5077	6.58947
Ddx3x	8.31068	10.9268	8.27692	7.07368
9530068E07Rik	8.30097	7.43902	10.6308	6.21053
Atg3	8.30097	5.96341	5.55385	8.58947
Naa15	8.30097	12.8659	8.78462	12.3474
Ndufaf5	8.30097	6.02439	5.38462	5.24211
Brsk2	8.29126	7.12195	8.50769	6.34737
Erp29	8.29126	7.82927	6.86154	5.4
Nipa2	8.28155	6.40244	7.61538	5.76842
Bscl2	8.28155	7.85366	8.72308	8.03158
Rpl17	8.28155	9.20732	11.3385	9.87368
Cdc123	8.27184	5.41463	9.55385	8.18947
Cul5	8.27184	8.43902	9.75385	16.3895
Acin1	8.26214	11.561	13.0923	20.0526
Rrp1	8.26214	6.95122	8.90769	9.26316
Gpr85	8.26214	9.58537	12.5077	12.0421
Ppm1g	8.26214	8.80488	5.36923	6.94737
Prxl2a	8.25243	6.60976	10.8462	4.17895
Elmo1	8.24272	6.54878	10.7385	4.04211
Sigmar1	8.24272	9.14634	11.8923	5.11579
Asb1	8.24272	5.47561	6.55385	2.29474
Omg	8.23301	5.04878	5.58462	2.33684
Spred1	8.23301	4.06098	4.76923	6.46316
Sh3gl2	8.23301	5.37805	5.66154	6.76842
Cacng2	8.23301	5.17073	5.8	2.69474
Adnp	8.2233	7.81707	7.47692	11.2421
Fsd1	8.2233	5.85366	5.58462	3.48421
Hnrnph2	8.2233	6.07317	6.64615	5.92632
Nsmf	8.21359	12.1585	8.81538	22.9158
Cnr1	8.21359	20.1341	200.2	18.1474
Fnta	8.20388	7.20732	5.46154	3.91579
Terf2ip	8.19417	8.35366	6.43077	8.83158
Nme3	8.18447	10.6951	8.16923	7.32632
AABR07033882.1	8.18447	6.41463	10.7231	8.4
Unc13a	8.18447	11.378	11.4923	15.0421
Anp32b	8.18447	14.122	11.4462	13.6105
Cwc15	8.18447	7.35366	9.43077	9.55789
Mtmr7	8.17476	6.4878	8.03077	6.86316
Upf3a	8.17476	8.08537	5.67692	8.63158
Hk1	8.17476	6.79268	9.78462	7.71579
Ptpn1	8.17476	8.34146	9.18462	8.07368
Rpap3	8.17476	10.0976	9.46154	19.4421
Gnptg	8.16505	6.81707	8.35385	7.58947
AC141489.1	8.16505	10.6951	9.32308	9.03158
Srgap2	8.14563	7.87805	7.83077	6.26316
Coa6	8.14563	5.95122	7.07692	9.75789
Man1a2	8.14563	4.2439	5.73846	7
Camk2d	8.14563	9.32927	12.0615	2.48421
St3gal5	8.14563	8.86585	5.36923	11.4421
Snx17	8.14563	6.58537	7.63077	6.2
Fkbp1b	8.14563	6.58537	11.5692	2.66316
Ubr5	8.14563	10.878	13.1231	17.4842
Rsrc2	8.13592	9.08537	10.0615	12.0421
Sez6	8.12621	14.7439	27.4462	19.1368
Apba1	8.12621	8.45122	10.1846	8.93684
Paip1	8.12621	8.21951	6.6	4.97895
Timm8a1	8.12621	4.93902	4.04615	3.65263
Uqcc3	8.1165	6.91463	7.29231	2.56842
Brinp2	8.1165	4.39024	4.27692	6.17895
Kcmf1	8.1165	7.5122	7.44615	8.81053
Preb	8.1165	8.67073	10.4462	10.1789
G3bp1	8.1068	10.7927	7.10769	10.9684
LOC102554070	8.1068	5.52439	11.3692	3.6
Snx6	8.1068	7.52439	8.72308	3.71579
LOC102551114	8.1068	6.02439	8.30769	14.3053
Usp7	8.09709	8.84146	8	11.0105
Eif1ad	8.09709	3.89024	5.16923	5.38947
Tardbp	8.09709	7.14634	7.66154	9.47368
Pdia6	8.09709	8.23171	8	12.0526
[truncated: 12,249 more rows]
