# Supplementary material for: Subcellular sequencing of single neurons reveals the dendritic transcriptome of GABAergic interneurons
Source: eLife. 2021 Jan 6;10:e63092. doi: 10.7554/eLife.63092 (PMC7819707; doi:10.7554/eLife.63092)
Supplement: Supplementary file 4. — Related to Figure 3. Contains results of differential expression test for: (Tab 1) GABAergic vs glutamatergic somata, (Tab 2) GABAergic vs glutamatergic dendrites, (Tab 3) GABAergic 1 vs GABAergic 2 and 3 somata, (Tab 4) GABAergic 1 vs GABAergic 2 and 3 dendrites, (Tab 5) GABAergic 2 vs GABAergic 3 somata, (Tab 6) GABAergic 1 vs GABAergic 2 and 3 dendrites. [file elife-63092-supp4.xlsx]

## Sheet: Somata_Glut._vs_GABA
Gene_Name	p-value	Avg_logFC	pct.Glutamatergic	pct.GABAergic	adj_p-value
Gad2	5.38014e-71	-2.82354	0.758	1	7.66562e-67
Slc6a1	6.29944e-60	-2.70719	0.695	0.992	8.97545e-56
LOC100912227	3.98265e-59	-2.32316	0.705	1	5.67448e-55
Slc32a1	4.96647e-55	-1.99131	0.421	0.976	7.07623e-51
Nap1l5	5.68656e-54	-1.9962	0.863	1	8.10221e-50
Gad1	1.06565e-51	-1.89134	0.863	1	1.51834e-47
Cplx1	1.09453e-48	-1.55325	0.853	1	1.55949e-44
Nrn1	1.94055e-46	3.04918	0.789	0.112	2.7649e-42
Lgi2	6.57142e-46	-1.8276	0.926	1	9.36296e-42
Pnoc	7.61508e-46	-2.85773	0.663	0.96	1.085e-41
Pcsk2	5.30517e-45	2.58704	0.905	0.408	7.55881e-41
Lbh	9.41624e-41	-2.06017	0.589	0.944	1.34163e-36
Bdnf	2.74219e-37	2.63025	0.926	0.388	3.90707e-33
Nptx1	2.75155e-37	3.15703	0.653	0.068	3.92041e-33
Reep5	2.78005e-34	-1.06681	0.958	1	3.96102e-30
Maf	3.23948e-34	-1.74191	0.495	0.92	4.61561e-30
Arpp21	3.28969e-34	2.33972	0.853	0.372	4.68715e-30
Gabrb1	8.38775e-34	2.1027	0.905	0.552	1.19509e-29
Bcat1	2.59148e-33	-0.947314	1	1	3.69234e-29
Stmn3	3.1848e-33	-1.00299	1	1	4.5377e-29
Sox2	6.66338e-33	-1.48011	0.589	0.948	9.49399e-29
Slc17a7	7.53455e-33	1.73972	0.632	0.044	1.07352e-28
Gpr88	1.2772e-32	-2.87672	0.632	0.888	1.81976e-28
Syt1	1.98507e-32	-0.946734	0.968	1	2.82833e-28
Kcnc2	3.67359e-32	-2.42822	0.484	0.864	5.23413e-28
Ldhb	8.6776e-32	-1.41214	1	1	1.23638e-27
Nnat	8.97471e-32	2.18608	0.947	0.684	1.27872e-27
Crtac1	9.62163e-32	-1.60554	0.779	0.972	1.37089e-27
Sphkap	2.31278e-30	2.77686	0.663	0.136	3.29525e-26
Hpcal4	2.82806e-30	1.97625	0.811	0.264	4.02941e-26
Phyhipl	5.05339e-30	-1.31721	0.874	0.996	7.20006e-26
Laptm4b	2.21921e-29	-1.54495	0.421	0.884	3.16193e-25
Reln	3.11654e-29	-2.3737	0.684	0.896	4.44044e-25
Epha5	1.09403e-28	-0.996702	0.768	0.96	1.55878e-24
Fabp5	1.09808e-28	-1.29263	0.874	0.988	1.56455e-24
Prdx2	1.98924e-28	-0.953839	0.989	1	2.83428e-24
Oip5	3.29319e-28	-1.53324	0.842	0.968	4.69213e-24
Zfp385d	6.52462e-28	-1.51135	0.568	0.908	9.29628e-24
LOC100910827	1.05334e-27	-1.1235	0.926	0.996	1.5008e-23
Nell2	1.07142e-27	1.94148	0.958	0.7	1.52656e-23
Ntm	1.15187e-27	-1.7426	0.516	0.864	1.64118e-23
Bhlhe22	1.22594e-27	2.28224	0.632	0.104	1.74672e-23
Chga	1.24738e-27	-1.10918	0.884	0.992	1.77727e-23
Klhl13	2.21249e-27	-1.40423	0.421	0.856	3.15235e-23
Atp5f1b	2.65026e-27	-0.792264	1	1	3.77609e-23
Nacc2	7.0297e-27	-1.52963	0.389	0.836	1.00159e-22
Vat1	8.61272e-27	-1.52957	0.358	0.84	1.22714e-22
Enc1	1.56043e-26	2.08897	0.768	0.22	2.2233e-22
Nfix	2.06351e-26	2.08915	0.663	0.164	2.94009e-22
AABR07017145.2	2.0643e-26	-1.23289	0.937	0.992	2.94122e-22
Dlx1	3.32354e-26	-1.62849	0.316	0.784	4.73538e-22
Arx	3.53301e-26	-1.805	0.305	0.764	5.03383e-22
Slc35g2	4.43176e-26	-1.602	0.316	0.776	6.31437e-22
Clstn2	4.59576e-26	-1.54853	0.663	0.94	6.54804e-22
Nxph1	5.20153e-26	-1.86491	0.579	0.872	7.41113e-22
Plxdc2	7.0152e-26	-1.41107	0.568	0.9	9.99525e-22
Spock3	9.75396e-26	-0.884981	0.737	0.98	1.38974e-21
Kcnq3	1.20869e-25	-1.29702	0.695	0.948	1.72214e-21
Slc6a7	2.56289e-25	-1.24094	0.537	0.916	3.65161e-21
Rab27b	3.33524e-25	-1.27772	0.516	0.888	4.75206e-21
Cited2	9.30031e-25	-1.1664	0.737	0.968	1.32511e-20
Cntnap4	1.07414e-24	-1.2117	0.632	0.94	1.53044e-20
Vstm2b	1.91777e-24	-1.46057	0.411	0.836	2.73243e-20
Pcp4l1	1.97091e-24	-1.84142	0.516	0.844	2.80815e-20
Vstm2a	2.90757e-24	-1.41319	0.6	0.916	4.14271e-20
Sv2b	4.14735e-24	2.21357	0.442	0.02	5.90914e-20
Sod2	4.73755e-24	-1.29527	0.958	0.972	6.75007e-20
AABR07054460.1	6.57028e-24	-1.19653	0.821	0.96	9.36133e-20
Pls3	7.39328e-24	-1.52023	0.421	0.808	1.05339e-19
Camk2b	8.84965e-24	0.888229	1	0.996	1.2609e-19
Tm6sf1	9.40742e-24	-1.61452	0.253	0.696	1.34037e-19
Lhx2	1.09557e-23	2.06372	0.421	0.016	1.56097e-19
Shd	1.16914e-23	-1.33749	0.389	0.828	1.66579e-19
Gria4	1.58575e-23	-0.87607	0.821	0.98	2.25937e-19
Nefh	1.58784e-23	-1.419	0.526	0.836	2.26236e-19
Camk2d	3.20041e-23	-1.3468	0.411	0.852	4.55994e-19
Zbtb20	3.69137e-23	2.20316	0.547	0.072	5.25947e-19
Miat	7.19759e-23	1.77961	0.811	0.376	1.02551e-18
Pebp1	7.58086e-23	-0.877798	1	1	1.08012e-18
Svil	7.64456e-23	-1.80031	0.379	0.756	1.0892e-18
Plppr5	2.11623e-22	-0.905428	0.758	0.964	3.01521e-18
Uqcrh	2.19789e-22	-0.718476	0.989	1	3.13156e-18
Slc25a3	2.49073e-22	-0.889853	1	1	3.54879e-18
Akap12	4.5988e-22	-1.50239	0.558	0.864	6.55237e-18
Arl4c	4.60405e-22	-1.1394	0.568	0.892	6.55985e-18
Baiap2	5.52829e-22	2.07899	0.6	0.192	7.87671e-18
Ciapin1	5.8261e-22	-1.12775	0.516	0.892	8.30103e-18
Cox6a2	6.1363e-22	-1.6628	0.411	0.768	8.743e-18
Map7	6.15709e-22	2.11035	0.432	0.04	8.77262e-18
Sod1	9.83346e-22	-0.854836	0.968	1	1.40107e-17
Ctsf	1.2009e-21	-0.930839	0.526	0.892	1.71104e-17
Robo2	1.29521e-21	-0.866295	0.8	0.996	1.84542e-17
Ppip5k2	1.5034e-21	-1.02057	0.768	0.98	2.14205e-17
Fam84a	1.50604e-21	-1.52319	0.358	0.764	2.1458e-17
Rnf139-Ndufb9	1.65808e-21	-0.897248	0.979	1	2.36244e-17
Mdh1	1.89029e-21	-0.926901	1	1	2.69328e-17
Ndufs2	1.96223e-21	-0.895447	0.937	0.992	2.79578e-17
Got2	2.98577e-21	-1.02232	0.947	0.976	4.25412e-17
AABR07060833.1	3.50006e-21	-2.59756	0.358	0.68	4.98689e-17
Snhg4	4.01106e-21	-1.20575	0.4	0.792	5.71495e-17
Ndrg4	4.06309e-21	-0.762477	1	1	5.7891e-17
Icam5	4.17409e-21	1.88061	0.642	0.22	5.94724e-17
Cerk	4.33284e-21	-1.15456	0.737	0.952	6.17343e-17
Ndufa4	5.27955e-21	-0.800013	1	1	7.5223e-17
Pnpo	5.35312e-21	-1.11671	0.389	0.82	7.62713e-17
Serf2	5.99096e-21	-0.880563	0.979	1	8.53592e-17
Galnt13	7.87044e-21	-0.883863	0.621	0.924	1.12138e-16
Tmem65	8.05518e-21	-1.27483	0.505	0.848	1.1477e-16
Cox4i1	8.38021e-21	-0.819376	0.989	1	1.19401e-16
Mpc2	8.91867e-21	-0.919408	0.979	0.996	1.27073e-16
Kcnip4	1.49248e-20	-2.03492	0.347	0.7	2.12649e-16
Fgfr1	1.49663e-20	1.95851	0.537	0.188	2.1324e-16
Nfia	1.94828e-20	1.78165	0.716	0.32	2.77591e-16
Clu	2.30394e-20	-1.11186	0.579	0.884	3.28266e-16
Ckmt1	2.78523e-20	-0.910657	0.937	0.988	3.96839e-16
Stat3	2.80435e-20	-1.00764	0.663	0.92	3.99564e-16
Rbms3	3.5619e-20	-1.41851	0.326	0.72	5.07499e-16
Kcnh3	5.16432e-20	1.74502	0.442	0.032	7.35812e-16
Kcna4	5.86922e-20	1.80688	0.853	0.5	8.36246e-16
Rab6a	8.22796e-20	-0.787724	0.968	0.996	1.17232e-15
Sst	8.29727e-20	-2.52987	0.537	0.768	1.1822e-15
Gnb1	1.01068e-19	-0.702842	0.895	0.996	1.44002e-15
Elavl2	1.2068e-19	-0.940586	0.737	0.956	1.71945e-15
Hsd17b12	1.23926e-19	-1.11712	0.832	0.968	1.76569e-15
Nfe2l1	1.26982e-19	-0.684762	1	1	1.80924e-15
Cops7a	1.30431e-19	-1.05892	0.705	0.92	1.85839e-15
Bola3	1.38448e-19	-1.07475	0.695	0.912	1.97261e-15
2510009E07Rik	1.51356e-19	-1.22534	0.621	0.896	2.15652e-15
Cemip	1.55582e-19	-1.42769	0.495	0.816	2.21673e-15
Chl1	2.12156e-19	-1.12691	0.884	0.964	3.02281e-15
Mcrip2	2.8969e-19	-1.43031	0.358	0.732	4.12751e-15
Slc25a4	2.93606e-19	-0.664668	1	1	4.1833e-15
Ndufa5	3.00038e-19	-0.750965	1	1	4.27494e-15
Cnksr2	3.03375e-19	1.99392	0.779	0.444	4.32248e-15
Son	3.12009e-19	1.04518	1	0.996	4.44551e-15
Fgf11	3.4449e-19	-1.03693	0.295	0.732	4.9083e-15
Epm2aip1	3.47192e-19	-0.750528	0.758	0.952	4.94679e-15
Neurod1	3.4957e-19	2.26838	0.432	0.044	4.98067e-15
Neurod2	5.64892e-19	1.79353	0.337	0.016	8.04858e-15
Kctd8	5.79608e-19	-1.67755	0.284	0.648	8.25826e-15
Lancl1	5.91828e-19	-0.925071	0.768	0.952	8.43237e-15
AC095947.1	6.03929e-19	-0.88728	0.958	0.984	8.60478e-15
Syngr3	6.77948e-19	-0.822174	0.958	1	9.65941e-15
Cacna1e	8.28136e-19	1.80093	0.768	0.4	1.17993e-14
Ddah1	8.85508e-19	-0.95924	0.768	0.956	1.26167e-14
Alg8-Ndufc2	1.03885e-18	-0.788122	0.947	0.992	1.48015e-14
Fabp3	1.21221e-18	-0.95461	0.874	0.98	1.72716e-14
AABR07069219.1	1.28059e-18	-1.35794	0.2	0.636	1.82458e-14
Ogdhl	1.33947e-18	-1.22382	0.263	0.684	1.90847e-14
Rab3a	1.71416e-18	-0.679531	1	1	2.44234e-14
Cd47	1.94354e-18	-0.801703	0.926	0.996	2.76915e-14
Nipa1	1.99304e-18	-1.0558	0.705	0.912	2.83968e-14
Hip1	2.20177e-18	-0.846301	0.821	0.984	3.13708e-14
Fam19a5	2.30858e-18	-0.858098	0.674	0.932	3.28926e-14
Crip2	2.41158e-18	1.8433	0.474	0.12	3.43602e-14
Nop10	2.64364e-18	-0.733656	0.789	0.976	3.76665e-14
Mrpl12	2.66517e-18	-0.932348	0.895	0.96	3.79733e-14
2010300C02Rik	2.85565e-18	1.8279	0.474	0.1	4.06872e-14
Nr4a2	4.56358e-18	1.93005	0.453	0.068	6.50218e-14
Nenf	6.20034e-18	-1.23346	0.2	0.656	8.83424e-14
Atp5mc3	6.52096e-18	-0.79081	1	1	9.29106e-14
Prkcg	6.68895e-18	1.93663	0.495	0.132	9.53042e-14
Esrrg	6.74219e-18	-1.49476	0.347	0.7	9.60627e-14
Gm1673	7.77061e-18	-0.670223	0.979	0.992	1.10716e-13
Fkbp3	9.26463e-18	-0.868606	0.989	1	1.32002e-13
Serpini1	9.51395e-18	-0.916047	0.842	0.984	1.35555e-13
Guk1	1.04413e-17	-0.770356	0.947	0.984	1.48768e-13
Cmpk1	1.06362e-17	-0.858245	0.674	0.924	1.51544e-13
Ndufs8	1.14675e-17	-0.938874	0.811	0.964	1.63389e-13
Kcng1	1.33105e-17	1.81703	0.337	0.02	1.89648e-13
Atp5pf	1.54546e-17	-0.869131	1	0.996	2.20197e-13
Elavl4	1.61216e-17	-0.986102	0.674	0.916	2.29701e-13
Bdh1	1.64272e-17	-1.12686	0.589	0.9	2.34055e-13
2020-09-11	1.66024e-17	1.44432	0.968	0.92	2.3655e-13
Cacng2	1.68487e-17	-0.895163	0.495	0.844	2.40061e-13
Atp6v0c-Amdhd2	1.71262e-17	-0.537649	1	1	2.44014e-13
B2m	1.92689e-17	-1.05081	0.611	0.884	2.74543e-13
Rgs3	1.98284e-17	-1.47891	0.168	0.564	2.82515e-13
Atp5mf-Zfp394	2.03849e-17	-0.745306	0.979	0.996	2.90444e-13
Dlx5	2.19014e-17	-1.02622	0.042	0.452	3.12051e-13
Gstp1	2.2803e-17	-0.985467	0.537	0.86	3.24898e-13
Trappc2l	2.58119e-17	-0.97034	0.758	0.916	3.67768e-13
St8sia5	2.76415e-17	-1.23275	0.105	0.512	3.93836e-13
Rtn4	3.28956e-17	-0.694085	0.989	1	4.68696e-13
Grm7	3.37215e-17	1.83609	0.684	0.3	4.80464e-13
Cox6a1	3.47546e-17	-0.635031	1	1	4.95183e-13
Gabra5	3.69264e-17	1.78438	0.716	0.4	5.26127e-13
Nrip3	4.28994e-17	-0.94646	0.737	0.932	6.11231e-13
Dpysl4	4.61991e-17	-0.911156	0.621	0.92	6.58245e-13
Npas4	4.67443e-17	2.08127	0.505	0.144	6.66013e-13
Bsg	5.17354e-17	-0.647855	0.989	1	7.37126e-13
Rab7b	5.29875e-17	-1.21024	0.168	0.572	7.54966e-13
Rtca	5.4204e-17	-1.09127	0.621	0.876	7.72298e-13
Usmg5	5.44055e-17	-0.780957	0.968	0.992	7.7517e-13
Maged2	5.55175e-17	-1.11745	0.463	0.78	7.91013e-13
Rap1gds1	5.60649e-17	-0.831005	0.884	0.956	7.98813e-13
Cadm1	5.74475e-17	1.48707	0.937	0.7	8.18512e-13
Ildr2	5.85994e-17	1.47081	0.611	0.184	8.34924e-13
Crh	5.91499e-17	-2.95791	0.389	0.604	8.42768e-13
Ubash3b	5.93119e-17	-1.08509	0.4	0.788	8.45076e-13
Alk	7.61657e-17	-1.22381	0.2	0.624	1.08521e-12
Ctsd	7.76998e-17	-0.759637	0.968	0.988	1.10707e-12
Ptprt	7.93968e-17	-1.54327	0.368	0.688	1.13125e-12
Rab6b	8.33747e-17	-0.604436	0.989	1	1.18792e-12
Nudt4	8.49249e-17	-0.99418	0.789	0.944	1.21001e-12
Vdac2	8.83726e-17	-0.784712	0.947	0.996	1.25913e-12
Schip1	8.86712e-17	1.56222	0.853	0.68	1.26339e-12
Ahi1	8.96974e-17	1.38792	0.968	0.92	1.27801e-12
Slc5a6	9.03549e-17	-1.1463	0.474	0.792	1.28738e-12
Mkks	1.02238e-16	-0.910362	0.821	0.952	1.45668e-12
Tox2	1.04241e-16	-1.11931	0.095	0.52	1.48523e-12
Kcnh2	1.14507e-16	-0.989037	0.379	0.772	1.63149e-12
Cartpt	1.27925e-16	-3.26203	0.495	0.7	1.82268e-12
Map1lc3a	1.29032e-16	-0.776188	0.789	0.98	1.83845e-12
Tcap	1.39976e-16	-1.63164	0.274	0.632	1.99438e-12
Rab3b	1.43877e-16	-1.34532	0.263	0.636	2.04996e-12
Mdh2	1.4537e-16	-0.804583	0.979	0.996	2.07123e-12
Ywhag	1.60009e-16	-0.564321	1	1	2.27981e-12
Ntrk3	1.62967e-16	1.55307	0.832	0.46	2.32195e-12
Col19a1	1.6399e-16	-0.641739	0.758	0.968	2.33654e-12
Glrx5	1.68469e-16	-1.09189	0.684	0.876	2.40034e-12
Arhgef6	1.83881e-16	-1.087	0.242	0.696	2.61994e-12
Ss18l2	1.83978e-16	-1.08386	0.863	0.936	2.62132e-12
Adamts18	1.89984e-16	1.44123	0.347	0.032	2.7069e-12
Ppp3ca	2.28502e-16	1.13336	1	0.992	3.25569e-12
Ndufa3	2.36011e-16	-0.615579	1	0.996	3.36269e-12
Osbpl1a	2.49495e-16	-1.24464	0.642	0.864	3.55481e-12
Ndufs1	2.62996e-16	-0.781529	0.768	0.932	3.74717e-12
Map1lc3b	2.79872e-16	-0.791017	0.8	0.968	3.98761e-12
Hcfc1r1	2.8116e-16	-0.622416	0.979	0.996	4.00597e-12
Oxct1	2.83915e-16	-0.632819	0.937	1	4.04523e-12
Cs	2.9679e-16	-0.649386	0.895	0.996	4.22867e-12
Ina	3.01309e-16	-0.683152	0.968	0.996	4.29305e-12
Stum	3.1521e-16	1.70074	0.368	0.032	4.49111e-12
Coprs	3.78838e-16	-0.849516	0.726	0.928	5.39768e-12
Calb1	3.87062e-16	1.81671	0.442	0.104	5.51487e-12
Avpi1	3.9128e-16	-1.15575	0.4	0.74	5.57496e-12
Serf1	3.94447e-16	-0.677761	0.747	0.956	5.62008e-12
Clpb	4.23755e-16	-0.905191	0.6	0.868	6.03766e-12
Syt13	4.3595e-16	-0.866947	0.432	0.812	6.21141e-12
Pcdh8	4.46702e-16	2.162	0.516	0.184	6.36461e-12
Kcna2	4.50358e-16	-1.3127	0.758	0.904	6.41671e-12
Tspyl4	4.51796e-16	-0.63368	0.989	1	6.43719e-12
Golim4	4.72867e-16	-1.28402	0.189	0.6	6.73741e-12
Mrpl54	4.96813e-16	-0.780704	0.663	0.924	7.07859e-12
Atp5po	5.15061e-16	-0.594913	0.989	1	7.33859e-12
Itm2c	5.24742e-16	1.16285	0.968	0.868	7.47652e-12
Cpne7	6.15761e-16	1.8871	0.611	0.228	8.77336e-12
Cables2	6.53241e-16	-1.20667	0.232	0.628	9.30738e-12
Evl	6.66945e-16	-0.794397	0.842	0.948	9.50263e-12
Gpx4	6.92246e-16	-0.771791	0.947	0.992	9.86312e-12
Scp2	6.99991e-16	-0.842606	0.716	0.92	9.97347e-12
Grik1	8.41637e-16	-1.2669	0.526	0.808	1.19916e-11
Uqcrq	8.79725e-16	-0.540708	0.989	1	1.25343e-11
Timm10b	8.90316e-16	-0.978787	0.568	0.86	1.26852e-11
Tmem150c	9.11733e-16	1.85519	0.463	0.136	1.29904e-11
Cox7a2l	9.7177e-16	-0.731746	0.968	0.988	1.38458e-11
Lzts1	9.78464e-16	1.57204	0.337	0.032	1.39412e-11
Rnd2	1.01108e-15	-1.13607	0.074	0.452	1.44059e-11
Cpeb3	1.01523e-15	-0.773462	0.832	0.988	1.4465e-11
Kit	1.10811e-15	-1.4054	0.495	0.8	1.57883e-11
Rps6ka2	1.16119e-15	-1.03161	0.274	0.68	1.65446e-11
Uqcr10	1.25731e-15	-0.719815	0.989	0.996	1.79141e-11
Ppia	1.33537e-15	-0.712495	0.916	0.98	1.90263e-11
Aldh7a1	1.35148e-15	-1.1647	0.495	0.804	1.92558e-11
Nsg1	1.44066e-15	-0.564224	0.968	0.996	2.05266e-11
Htra4	1.63948e-15	2.52844	0.347	0.044	2.33594e-11
Mrps36	1.68068e-15	-0.801815	0.716	0.924	2.39463e-11
Auh	1.68325e-15	-0.929536	0.863	0.936	2.3983e-11
Itpka	1.78078e-15	1.70029	0.326	0.028	2.53725e-11
Mast3	1.81478e-15	1.55771	0.4	0.084	2.5857e-11
Uqcrfs1	1.8295e-15	-0.990958	0.989	0.984	2.60667e-11
Iqsec1	1.87638e-15	-0.791478	0.684	0.912	2.67346e-11
Ankrd34b	1.91164e-15	-1.06792	0.211	0.6	2.72371e-11
Tsc22d3	1.99969e-15	-1.03181	0.537	0.828	2.84915e-11
Smdt1	2.11087e-15	-0.723593	0.979	0.992	3.00756e-11
Kcns3	2.2872e-15	-1.21152	0.042	0.404	3.2588e-11
Dynlrb1	2.30376e-15	-0.613758	0.979	0.992	3.28239e-11
Olfm3	2.38723e-15	-1.28717	0.221	0.596	3.40132e-11
Mtfp1	2.51334e-15	-1.19228	0.421	0.732	3.58101e-11
Hipk2	2.90256e-15	-1.00349	0.505	0.868	4.13557e-11
Cox5b	3.29703e-15	-0.564136	1	1	4.69761e-11
Cxxc4	3.41415e-15	-1.19012	0.368	0.728	4.86449e-11
Slc25a11	3.46132e-15	-0.840434	0.916	0.976	4.93168e-11
Mepe	3.66103e-15	-2.25299	0.179	0.516	5.21624e-11
Anapc15	3.68919e-15	-1.29678	0.095	0.46	5.25636e-11
Ndufb6	4.02816e-15	-0.826161	1	1	5.73933e-11
Extl2	4.14718e-15	-0.876135	0.547	0.836	5.9089e-11
Rock2	4.2389e-15	1.2878	0.979	0.952	6.03958e-11
Cacna2d1	4.59083e-15	1.45549	0.789	0.452	6.54102e-11
Mrpl51	4.60579e-15	-0.961137	0.537	0.824	6.56233e-11
Fryl	5.34829e-15	-0.779158	0.737	0.936	7.62024e-11
Nap1l3	5.40589e-15	-0.848695	0.611	0.9	7.70231e-11
Phactr1	5.48446e-15	-0.713816	0.716	0.936	7.81426e-11
Ghitm	5.60633e-15	-0.818939	0.979	0.996	7.9879e-11
Hdhd2	5.63073e-15	-0.830657	0.947	0.968	8.02267e-11
Ptk2b	5.78014e-15	1.42918	0.453	0.1	8.23555e-11
Uqcrb-224005	6.32199e-15	-0.611932	1	0.996	9.00758e-11
Mir124-2	6.4464e-15	-1.09285	0.189	0.564	9.18484e-11
Rnasek	6.44992e-15	-0.546652	1	1	9.18985e-11
Fras1	6.66863e-15	1.70202	0.484	0.16	9.50147e-11
Nr4a3	7.46799e-15	1.41299	0.8	0.476	1.06404e-10
Gcsh	7.85189e-15	-1.00861	0.432	0.736	1.11874e-10
Ndufb11	8.29112e-15	-0.640688	0.958	0.996	1.18132e-10
Idh3B	8.39216e-15	-0.664669	0.958	0.988	1.19572e-10
Zfp804b	8.57331e-15	-1.24836	0.168	0.56	1.22152e-10
Phpt1	8.70106e-15	-0.822421	0.884	0.972	1.23973e-10
LOC108352650	8.82736e-15	-0.551015	1	1	1.25772e-10
Ndufv2	9.45567e-15	-0.619194	0.958	0.988	1.34724e-10
Clcn4	9.99473e-15	-0.929843	0.474	0.812	1.42405e-10
Hcn3	1.03118e-14	-0.965308	0.379	0.744	1.46923e-10
Zmat3	1.41306e-14	-0.886437	0.558	0.84	2.01333e-10
Snhg11	1.42163e-14	-0.642238	0.947	0.996	2.02553e-10
Reps2	1.424e-14	-0.958203	0.505	0.796	2.02892e-10
LOC301124	1.47781e-14	-0.667338	0.968	0.976	2.10558e-10
Abat	1.48436e-14	-0.981348	0.379	0.72	2.11491e-10
Nucb1	1.4967e-14	-0.872822	0.621	0.884	2.1325e-10
Pgam1	1.57117e-14	-0.637138	0.968	1	2.2386e-10
Lage3-Ubl4a	1.62876e-14	-0.89375	0.937	0.968	2.32066e-10
Fkbp1b	1.6818e-14	-1.16337	0.463	0.768	2.39622e-10
Satb1	1.83669e-14	-1.66687	0.537	0.756	2.61692e-10
Ndufa2	1.9071e-14	-0.619964	0.968	0.996	2.71723e-10
Pdhx	1.94019e-14	-1.00374	0.684	0.872	2.76438e-10
Cfl2	2.16628e-14	-0.603214	0.916	0.984	3.08651e-10
Pthlh	2.27539e-14	-2.0223	0.568	0.736	3.24198e-10
Cox6b1-004303	2.32277e-14	-0.599117	0.916	0.992	3.30948e-10
Flrt2	2.40162e-14	-1.28671	0.358	0.704	3.42183e-10
AABR07028970.2	2.53652e-14	1.65813	0.537	0.208	3.61403e-10
Nt5dc3	2.64767e-14	-0.761788	0.579	0.888	3.7724e-10
Npr3	3.07105e-14	-1.05716	0.253	0.612	4.37564e-10
Rcan2	3.18939e-14	-0.670689	0.821	0.952	4.54424e-10
Itfg1	3.24775e-14	-0.789035	0.842	0.952	4.62739e-10
Ciao2b	3.33498e-14	-0.680458	0.568	0.864	4.75168e-10
Ndufb5	3.38141e-14	-0.559257	0.947	0.992	4.81784e-10
Fgf9	3.46997e-14	-1.12054	0.453	0.728	4.94401e-10
Gria3	3.62786e-14	-1.00772	0.495	0.768	5.16897e-10
Tceal6	3.6446e-14	-0.840097	0.232	0.652	5.19283e-10
Dynll2	3.83031e-14	-0.68191	0.916	0.988	5.45743e-10
Fgl2	3.83105e-14	-1.68423	0.147	0.512	5.45848e-10
AABR07052500.1	3.85178e-14	-1.09267	0.105	0.512	5.48802e-10
Myo5b	4.02101e-14	-1.09467	0.105	0.476	5.72914e-10
Cap1	4.28406e-14	-0.749708	0.863	0.968	6.10394e-10
Araf	4.63828e-14	-0.63615	0.853	0.972	6.60863e-10
Ank3	4.74817e-14	0.989151	0.968	0.992	6.76519e-10
Vdac3	4.96428e-14	-0.711907	0.947	0.976	7.0731e-10
BC031181	5.46932e-14	-0.614027	0.916	0.984	7.79269e-10
Hs3st1	6.27313e-14	-0.973256	0.568	0.828	8.93795e-10
LOC100911769	6.7444e-14	-0.551094	0.779	0.976	9.60942e-10
Uqcc3	7.07302e-14	-1.07268	0.463	0.756	1.00776e-09
Ykt6	7.20059e-14	-0.813786	0.632	0.88	1.02594e-09
Ppp1r14b	7.67994e-14	-0.735967	0.253	0.668	1.09424e-09
Atp5mc1	7.78395e-14	-0.699484	0.989	1	1.10906e-09
Fto	8.10417e-14	-0.83128	0.274	0.676	1.15468e-09
Tufm	8.55884e-14	-0.765662	0.516	0.808	1.21946e-09
Rimkla	8.76702e-14	-0.955204	0.432	0.752	1.24912e-09
Atp5f1c-094163	1.00119e-13	-0.646706	0.989	0.992	1.4265e-09
Sf3b1	1.12185e-13	1.12957	0.989	0.96	1.59841e-09
Cyc1	1.12837e-13	-0.574201	0.968	1	1.6077e-09
Igf1	1.23704e-13	-1.75137	0.337	0.588	1.76253e-09
Sv2a	1.24402e-13	-0.611128	0.989	0.996	1.77248e-09
Fgf12	1.2679e-13	-0.809977	0.737	0.924	1.80651e-09
Bnc1-Hdgfl3	1.2758e-13	-0.748393	0.779	0.928	1.81776e-09
Scrn1	1.28388e-13	-0.708332	0.684	0.908	1.82927e-09
Gpx3	1.36496e-13	-1.32805	0.053	0.384	1.9448e-09
Tmx2	1.41255e-13	-0.769858	0.916	0.964	2.0126e-09
Krt222	1.41321e-13	-0.870085	0.189	0.596	2.01355e-09
Pgp	1.42331e-13	-0.551062	0.779	0.948	2.02793e-09
Ano10	1.47086e-13	-0.899077	0.284	0.7	2.09568e-09
Tmem117	1.47378e-13	-0.936653	0.032	0.36	2.09985e-09
Stoml1	1.50318e-13	-0.756773	0.337	0.712	2.14173e-09
Igfbp5	1.62254e-13	2.00302	0.421	0.1	2.31179e-09
Rbms1	1.64376e-13	-1.12696	0.084	0.448	2.34203e-09
Dpp10	1.71216e-13	-1.0711	0.4	0.728	2.43949e-09
Btbd2	1.74186e-13	-0.967153	0.274	0.672	2.48181e-09
Cort	1.77942e-13	-2.38352	0.474	0.68	2.53532e-09
Rex1bd	1.79404e-13	-0.826218	0.663	0.868	2.55615e-09
Neurod6	1.85573e-13	1.48674	0.253	0.004	2.64405e-09
Uqcrc1	1.85608e-13	-0.611966	0.884	0.968	2.64455e-09
2900026A02Rik	1.94986e-13	1.60561	0.316	0.052	2.77817e-09
Lamtor4	2.0266e-13	-0.80835	0.705	0.892	2.88751e-09
Sdha	2.3439e-13	-0.673834	0.811	0.94	3.33959e-09
Celf2	2.39145e-13	1.04178	0.989	0.98	3.40734e-09
Tmem70	2.43188e-13	-1.02659	0.463	0.744	3.46494e-09
Cygb	2.56728e-13	-0.845453	0.242	0.644	3.65786e-09
Abcb8	2.70303e-13	-0.696662	0.316	0.688	3.85127e-09
Enpp5	2.7361e-13	-0.718874	0.811	0.944	3.89839e-09
Tnik	2.77993e-13	1.26769	0.811	0.572	3.96084e-09
Zbtb18	2.77999e-13	1.87751	0.379	0.088	3.96094e-09
Tbc1d9	2.84761e-13	-0.722279	0.653	0.884	4.05728e-09
Slc4a7	2.85942e-13	1.39197	0.8	0.588	4.0741e-09
Car2	3.42559e-13	-1.00161	0.274	0.6	4.88078e-09
Magee1	3.57737e-13	-0.619542	0.726	0.928	5.09703e-09
Ndufv1	3.76443e-13	-0.520971	0.937	0.984	5.36356e-09
Fkbp2	3.80173e-13	-0.550773	0.884	0.98	5.4167e-09
Glrx3	4.04944e-13	-0.632441	0.947	0.976	5.76964e-09
Ap1s2	4.057e-13	-0.765177	0.463	0.792	5.78041e-09
Lhx6-Ndufa8	4.81249e-13	-0.55608	0.979	0.996	6.85684e-09
Fos	4.84023e-13	1.73493	0.863	0.636	6.89637e-09
Anapc2	4.86767e-13	-0.904847	0.705	0.868	6.93546e-09
Arl2	4.98038e-13	-0.735911	0.558	0.832	7.09605e-09
Ctsl	5.01784e-13	-0.803081	0.621	0.864	7.14942e-09
Rab14	5.53113e-13	-0.553002	0.989	1	7.88075e-09
Ckb	5.62572e-13	-0.605235	1	1	8.01553e-09
Mtss1	5.81017e-13	-0.806271	0.632	0.872	8.27833e-09
Lnx1	6.00265e-13	-0.922206	0.274	0.664	8.55258e-09
Hpse	6.00621e-13	-1.09226	0.232	0.604	8.55765e-09
Tecr	6.1377e-13	-0.533238	0.968	0.996	8.74499e-09
Abcb9	6.16169e-13	-0.849493	0.116	0.528	8.77918e-09
Fbxo10.2	6.4792e-13	-0.56719	0.937	0.988	9.23156e-09
Layn	6.95997e-13	-0.935309	0	0.28	9.91656e-09
Pvalb	6.95997e-13	-1.01087	0	0.28	9.91656e-09
Hcn1	7.33183e-13	-0.705045	0.832	0.936	1.04464e-08
Zranb2	7.42038e-13	1.04448	1	0.992	1.05726e-08
Omg	7.73942e-13	-1.023	0.411	0.708	1.10271e-08
Plekhb2	8.65357e-13	-0.808908	0.842	0.948	1.23296e-08
Zc2hc1a	8.73306e-13	-0.803228	0.242	0.648	1.24429e-08
Pcyox1	9.29777e-13	-0.740118	0.874	0.96	1.32475e-08
Ccnd2	9.37627e-13	1.24891	0.884	0.64	1.33593e-08
Atp5f1a	9.46698e-13	-0.540437	1	1	1.34886e-08
Foxn3	9.72189e-13	-1.06669	0.474	0.764	1.38517e-08
Pnkd-249880	1.01831e-12	-0.745675	0.095	0.496	1.45089e-08
Poldip2	1.02071e-12	-0.648414	0.663	0.892	1.45431e-08
Tgfbr2	1.03119e-12	-0.997291	0.021	0.324	1.46924e-08
Ankrd33b	1.06077e-12	1.45764	0.221	0.004	1.51138e-08
Nol3	1.14348e-12	-1.09873	0.211	0.596	1.62922e-08
Tmem179	1.33523e-12	-0.847265	0.684	0.896	1.90243e-08
Brinp1	1.3966e-12	-0.794456	0.747	0.924	1.98987e-08
Asb1	1.40027e-12	-1.10032	0.421	0.7	1.9951e-08
Ssu72	1.44461e-12	-0.684804	0.779	0.944	2.05828e-08
Thtpa	1.4964e-12	-0.825264	0.474	0.804	2.13206e-08
Hdac11	1.51216e-12	-0.901161	0.421	0.748	2.15453e-08
Ypel5	1.55011e-12	-0.695833	0.642	0.848	2.2086e-08
Sucla2	1.62065e-12	-0.745817	0.884	0.944	2.30911e-08
Olr1274-Rgs7bp-Olr1273-Olr1275-Olr1278-Olr1279-Olr1280	1.63839e-12	-0.565941	0.905	0.992	2.33438e-08
Ankrd46	1.6645e-12	-0.65336	0.758	0.928	2.37158e-08
Unc119	1.89372e-12	-0.630425	0.126	0.532	2.69817e-08
LOC100360846-Psmb6	2.06477e-12	-0.755672	0.632	0.864	2.94188e-08
Tln1	2.07356e-12	-0.774617	0.474	0.8	2.95441e-08
Junb	2.19093e-12	1.22649	0.453	0.22	3.12164e-08
Xkr4	2.27356e-12	-0.521944	0.937	0.98	3.23936e-08
Trappc1	2.27471e-12	-0.734116	0.737	0.904	3.24101e-08
Wif1	2.28288e-12	-1.37582	0.358	0.62	3.25265e-08
AABR07029417.1	2.52106e-12	-0.51641	0	0.268	3.592e-08
Trappc4	2.53341e-12	-0.748277	0.463	0.776	3.60961e-08
Fbh1	2.72709e-12	-1.00103	0.411	0.736	3.88556e-08
Elovl5	2.80044e-12	-0.8671	0.589	0.836	3.99007e-08
Snca	3.1234e-12	1.25913	0.874	0.636	4.45022e-08
Dync1li2	3.16002e-12	-0.721216	0.821	0.952	4.50239e-08
AABR07064304.1	3.16521e-12	-1.42949	0.063	0.4	4.50979e-08
Oaz2	3.24304e-12	-0.630075	0.916	0.984	4.62068e-08
Acot7	3.34193e-12	-0.570437	0.958	0.984	4.76159e-08
Aak1	3.37394e-12	-0.511979	0.747	0.94	4.80719e-08
Mrpl42	3.44857e-12	-0.581302	0.642	0.856	4.91352e-08
Gla	3.49302e-12	-0.69007	0.432	0.76	4.97685e-08
Dnajb4	3.58092e-12	-0.964591	0.568	0.796	5.10209e-08
Enho	3.62781e-12	-0.599034	0.537	0.828	5.1689e-08
Farsa	3.6342e-12	-0.980874	0.095	0.444	5.17801e-08
AABR07049790.1	3.71572e-12	1.56173	0.663	0.4	5.29416e-08
LOC102552810	3.7334e-12	-1.34375	0.316	0.588	5.31934e-08
Nptx2	3.75244e-12	1.57268	0.326	0.088	5.34647e-08
Dld	3.7532e-12	-0.689362	0.811	0.964	5.34756e-08
Lrp11	3.78418e-12	-0.665602	0.684	0.908	5.39169e-08
Rsph9	3.8955e-12	1.58853	0.337	0.072	5.5503e-08
Hivep1	3.93993e-12	-1.18433	0.137	0.504	5.61361e-08
Ufm1	4.01149e-12	-0.865183	0.589	0.832	5.71557e-08
Stac2	4.01961e-12	-0.604813	0.021	0.344	5.72714e-08
Col26a1	4.21932e-12	-1.16473	0.042	0.328	6.01169e-08
Prdx5	4.30138e-12	-0.679373	0.926	0.972	6.12861e-08
Adamts15	4.52379e-12	-1.21429	0.095	0.432	6.4455e-08
Tmem246	5.11625e-12	-0.923213	0.611	0.832	7.28963e-08
Fat3	5.16012e-12	1.0454	0.832	0.528	7.35215e-08
Ddit3	5.30869e-12	-0.760259	0.484	0.784	7.56382e-08
Sdf4	5.45981e-12	-0.883452	0.642	0.84	7.77913e-08
Nfib-190674	5.86064e-12	0.898142	0.968	0.808	8.35024e-08
Clec2l	6.01055e-12	-0.725628	0.505	0.776	8.56383e-08
Eps8	6.02716e-12	-0.650665	0.642	0.856	8.5875e-08
Gbp1	6.07018e-12	-1.37315	0.179	0.492	8.64879e-08
Rprml	6.13944e-12	1.64322	0.274	0.024	8.74748e-08
Rab11b	6.24042e-12	-0.576044	0.905	0.964	8.89136e-08
Iscu	6.28065e-12	-0.538281	0.895	0.972	8.94867e-08
LOC100911177	6.33941e-12	-0.779875	0.716	0.896	9.03239e-08
Cox5a	6.5751e-12	-0.727022	0.958	0.992	9.3682e-08
Iqgap2	6.7115e-12	1.57062	0.4	0.12	9.56255e-08
Egr1	6.72169e-12	1.59121	0.389	0.104	9.57706e-08
Ndufs7	6.97132e-12	-0.592048	0.937	0.984	9.93274e-08
Ubfd1	7.16729e-12	-0.702058	0.568	0.848	1.02119e-07
Ube2h	7.45766e-12	-0.659234	0.484	0.796	1.06257e-07
Tmem160	7.70641e-12	-0.598008	0.905	0.976	1.09801e-07
Vxn	8.13978e-12	1.54918	0.284	0.028	1.15976e-07
Atp8a2	8.19074e-12	-0.537249	0.853	0.972	1.16702e-07
Vegfb	8.31974e-12	-0.746058	0.253	0.64	1.1854e-07
Phlda1	8.61929e-12	-1.30039	0.526	0.728	1.22808e-07
Lgals8	8.64087e-12	-0.857469	0.274	0.648	1.23115e-07
Akap5	9.21463e-12	-0.690547	0.495	0.756	1.3129e-07
Prickle2	9.43703e-12	1.46335	0.695	0.504	1.34459e-07
Sgtb	1.01698e-11	-0.731899	0.842	0.936	1.44899e-07
Mgst3	1.04247e-11	-0.612753	0.905	0.968	1.48532e-07
Slc9a6	1.07716e-11	-0.828178	0.568	0.824	1.53473e-07
Mindy2	1.10798e-11	-0.700293	0.632	0.896	1.57864e-07
Ndufb8	1.13315e-11	-0.574597	1	1	1.61451e-07
Atp5mc2	1.15391e-11	-0.635461	0.947	0.968	1.64408e-07
Cd164l2	1.18862e-11	-0.892966	0.063	0.4	1.69354e-07
Dut	1.18942e-11	-0.756504	0.221	0.58	1.69469e-07
Mrpl35	1.21575e-11	-0.581851	0.653	0.88	1.73221e-07
Aldh3a2	1.27154e-11	-1.01501	0.337	0.648	1.81169e-07
Mllt11	1.28372e-11	-0.530812	0.968	0.996	1.82904e-07
Bzw1	1.32029e-11	-0.556369	0.653	0.876	1.88115e-07
Tmem229b	1.38107e-11	-0.808784	0.632	0.848	1.96775e-07
Ndufa6	1.41818e-11	-0.707651	0.979	0.992	2.02062e-07
Pink1-AABR07050212.1	1.45211e-11	-0.917335	0.526	0.756	2.06897e-07
Ptprm	1.46009e-11	-1.14212	0.105	0.444	2.08033e-07
Shroom2	1.4917e-11	-0.789996	0.305	0.66	2.12537e-07
Rcan3	1.50324e-11	-1.04831	0.189	0.528	2.14181e-07
Msantd4	1.5105e-11	-0.647719	0.684	0.88	2.15216e-07
Cd320-Ndufa7	1.53068e-11	-0.522209	0.937	0.976	2.18091e-07
Marchf1	1.53095e-11	1.48746	0.358	0.064	2.1813e-07
Pex19	1.58503e-11	-0.569618	0.442	0.756	2.25835e-07
Rnf187	1.63431e-11	-0.530621	0.958	0.992	2.32856e-07
AABR07060487.1	1.64295e-11	-0.904679	0.442	0.732	2.34087e-07
Hs6st2	1.64457e-11	-1.10643	0.4	0.672	2.34318e-07
Lpgat1	1.67062e-11	-0.740888	0.674	0.872	2.3803e-07
Pfkm	1.67273e-11	-0.508659	0.874	0.96	2.38331e-07
Ctsb	1.69456e-11	-0.673729	0.758	0.936	2.4144e-07
Serinc2	1.69583e-11	1.14751	0.274	0.016	2.41622e-07
Emc4	1.71458e-11	-0.677558	0.947	0.968	2.44293e-07
Fat1	1.7224e-11	-0.926093	0.189	0.544	2.45408e-07
Ptp4a3	1.747e-11	-0.760603	0.168	0.556	2.48913e-07
Trappc6b	1.7557e-11	-0.725111	0.453	0.752	2.50152e-07
Ndufc1	1.76237e-11	-0.560519	0.989	0.996	2.51103e-07
Ache	1.78445e-11	-0.548763	0.053	0.42	2.54248e-07
Fbxo2	1.8298e-11	-0.800919	0.295	0.648	2.6071e-07
Smim17	1.94476e-11	-0.972816	0.126	0.512	2.77089e-07
Nap1l2	2.00123e-11	-0.757545	0.705	0.892	2.85136e-07
Cd83	2.07949e-11	-0.815365	0	0.248	2.96286e-07
Etl4	2.12943e-11	-1.05157	0.474	0.7	3.03401e-07
Igsf3	2.14619e-11	1.70715	0.411	0.2	3.05789e-07
Arhgap10	2.19824e-11	1.4567	0.295	0.064	3.13205e-07
Mrpl27	2.22538e-11	-0.648783	0.6	0.832	3.17072e-07
Afap1	2.2348e-11	-0.926475	0.284	0.592	3.18414e-07
Chst2	2.24892e-11	-0.672107	0.874	0.948	3.20426e-07
Mfsd12	2.30461e-11	-0.694005	0.684	0.876	3.2836e-07
Cox14	2.36775e-11	-0.721103	0.916	0.964	3.37358e-07
Eef1e1-Bloc1s5	2.45731e-11	-0.774968	0.663	0.876	3.50118e-07
Nog	2.49635e-11	-0.783426	0.011	0.276	3.5568e-07
Hspe1	2.50783e-11	-0.702705	0.895	0.948	3.57316e-07
Habp4	2.51838e-11	-0.756687	0.495	0.764	3.58819e-07
Nudt19	2.56012e-11	-0.808654	0.474	0.764	3.64765e-07
Elmo1	2.60342e-11	-0.723818	0.516	0.772	3.70935e-07
Maea	2.61465e-11	-0.853664	0.568	0.784	3.72535e-07
Khdrbs2	3.01929e-11	1.20948	0.642	0.36	4.30188e-07
Agl	3.085e-11	-0.856178	0.495	0.78	4.39551e-07
Glrx2	3.10344e-11	-0.502902	0.853	0.952	4.42177e-07
Cystm1	3.11828e-11	-0.651231	0.811	0.944	4.44293e-07
LOC691807	3.12554e-11	-0.772683	0.568	0.8	4.45327e-07
Wwc1	3.1735e-11	1.41972	0.568	0.388	4.52161e-07
Tsfm	3.27521e-11	-0.768814	0.368	0.7	4.66652e-07
Rab18	3.30087e-11	-0.715996	0.674	0.892	4.70308e-07
Mgll	3.45811e-11	-0.582045	0.621	0.868	4.92711e-07
Atp1b3	3.62832e-11	-0.598615	0.6	0.856	5.16963e-07
Ergic3	3.69583e-11	-0.618407	0.568	0.86	5.26582e-07
Ndufa10l1	3.70975e-11	-0.630248	0.842	0.952	5.28564e-07
Lmo7	3.7281e-11	1.34994	0.4	0.136	5.3118e-07
Wls	3.89737e-11	-0.840954	0.242	0.568	5.55297e-07
Chrna7	3.95644e-11	-1.32763	0.526	0.732	5.63713e-07
Uhmk1	4.12861e-11	-0.606196	0.747	0.92	5.88244e-07
Snrnp70	4.2025e-11	1.10425	0.979	0.988	5.98773e-07
Pcsk5	4.26373e-11	1.23369	0.326	0.052	6.07496e-07
Lynx1	4.26698e-11	-1.06768	0.505	0.736	6.07959e-07
Tmed10	4.26704e-11	-0.651674	0.874	0.952	6.07968e-07
Zdbf2	4.32174e-11	1.60497	0.8	0.596	6.15761e-07
Gatd3a	4.43415e-11	-0.69126	0.863	0.944	6.31778e-07
Zfp667	4.44836e-11	1.4306	0.326	0.06	6.33803e-07
AABR07027212.1	4.59104e-11	-0.657021	0.4	0.756	6.54132e-07
Epb41l3	4.59457e-11	-0.791012	0.474	0.756	6.54635e-07
Dctn6	4.89462e-11	-0.914607	0.684	0.864	6.97385e-07
Slc25a20	4.97982e-11	-0.81093	0.295	0.648	7.09525e-07
Rgs17	5.24112e-11	-0.866302	0.495	0.736	7.46754e-07
Atp5f1d	5.36539e-11	-0.530436	1	1	7.64461e-07
Bpnt1	5.41433e-11	-0.677454	0.779	0.92	7.71434e-07
Rps26	5.64524e-11	-0.544348	0.821	0.956	8.04335e-07
Fam20b	5.67517e-11	-0.639947	0.463	0.776	8.08598e-07
Pja2	5.81621e-11	-0.520326	0.979	1	8.28694e-07
Lef1	5.95632e-11	1.3167	0.232	0.008	8.48656e-07
Mrpl52	5.98845e-11	-0.517432	0.684	0.9	8.53234e-07
Fam49b	6.39736e-11	-0.781259	0.695	0.868	9.11495e-07
Prdx3	6.54875e-11	-0.859002	0.611	0.828	9.33065e-07
Hspd1	6.74462e-11	-0.626295	0.895	0.964	9.60974e-07
Gfod1	6.79316e-11	-0.717439	0.463	0.756	9.67889e-07
Aldoc	6.93235e-11	-1.02683	0.558	0.772	9.87721e-07
Arhgap12	7.14802e-11	-0.56275	0.432	0.756	1.01845e-06
Ilvbl	7.24484e-11	-0.906267	0.084	0.416	1.03225e-06
Cox11	7.29879e-11	-0.708229	0.021	0.328	1.03993e-06
Edil3	7.46257e-11	1.21628	0.684	0.356	1.06327e-06
Chn1	7.6174e-11	1.3969	0.842	0.692	1.08533e-06
LOC100909866	7.61788e-11	-0.837554	0.263	0.616	1.0854e-06
Slc49a4	7.64066e-11	-0.815517	0.242	0.58	1.08864e-06
Atpaf1	7.68136e-11	-1.0832	0.211	0.548	1.09444e-06
Cdo1	7.71095e-11	-0.75172	0.695	0.896	1.09866e-06
Slc35b4	8.04486e-11	-0.871885	0.263	0.608	1.14623e-06
Igfbp3	8.5152e-11	-0.996297	0.737	0.852	1.21325e-06
Nyap2	8.81391e-11	-0.815253	0.474	0.756	1.25581e-06
mrpl24	9.19451e-11	-0.720779	0.568	0.812	1.31003e-06
Tmem30a	9.51224e-11	-0.622684	0.916	0.984	1.3553e-06
Traf3	9.5326e-11	-0.788136	0.316	0.648	1.3582e-06
Rab2b	9.59886e-11	-0.694165	0.516	0.8	1.36765e-06
Grip1	9.93765e-11	-0.50509	0.684	0.884	1.41592e-06
Cep19	1.0349e-10	-0.827922	0.579	0.808	1.47453e-06
Ostc	1.10943e-10	-0.511946	0.737	0.908	1.58071e-06
Hspa4l	1.11834e-10	-0.665245	0.789	0.94	1.59342e-06
Ndufs3-Ptpmt1	1.1214e-10	-0.518049	0.958	0.992	1.59776e-06
Dlst	1.1392e-10	-0.514453	0.705	0.9	1.62313e-06
Man1c1	1.14095e-10	-0.629862	0.126	0.496	1.62563e-06
Sfxn5	1.14478e-10	-0.914498	0.305	0.608	1.63108e-06
Cd63	1.17966e-10	-0.595107	0.789	0.924	1.68077e-06
Grsf1	1.20106e-10	-0.743856	0.568	0.792	1.71127e-06
Pea15	1.22907e-10	-0.598529	0.842	0.956	1.75118e-06
Lingo1	1.30773e-10	1.01342	0.716	0.508	1.86325e-06
Atp2b1	1.37649e-10	0.551858	1	1	1.96123e-06
Fam98a	1.4093e-10	-0.715648	0.526	0.784	2.00797e-06
Trib2	1.41393e-10	-0.784424	0.189	0.52	2.01457e-06
Ppfia2	1.43977e-10	1.2361	0.916	0.92	2.05139e-06
Ascl1	1.52578e-10	-1.43031	0.084	0.372	2.17393e-06
Ndufb7	1.53645e-10	-0.522479	0.979	0.996	2.18914e-06
Grik4	1.54922e-10	1.02975	0.337	0.072	2.20733e-06
Erbin	1.55866e-10	-0.771119	0.263	0.6	2.22078e-06
Ppif	1.58763e-10	-0.811171	0.137	0.508	2.26206e-06
Elovl4	1.62742e-10	-0.671199	0.663	0.88	2.31874e-06
Uhrf1bp1	1.71966e-10	-0.777763	0.137	0.508	2.45017e-06
Mrps10	1.76154e-10	-0.704735	0.611	0.82	2.50984e-06
Dynlt1	1.82918e-10	-0.827847	0.737	0.884	2.60622e-06
Ppa2	1.83461e-10	-0.903291	0.432	0.676	2.61395e-06
Zmat4	1.85677e-10	-0.902277	0.126	0.44	2.64553e-06
Dnajb2	1.87597e-10	-0.728953	0.611	0.84	2.67288e-06
Csk	1.87732e-10	-0.860631	0.326	0.66	2.67481e-06
Paip2b	1.89654e-10	-0.753471	0.232	0.588	2.70219e-06
Pde8b	1.92014e-10	-1.10201	0.032	0.304	2.73581e-06
LOC102554070	2.01863e-10	-0.811917	0.484	0.748	2.87615e-06
Celf5	2.11024e-10	1.0247	0.821	0.64	3.00666e-06
Acyp1	2.16429e-10	-0.785695	0.368	0.668	3.08368e-06
Grin2b	2.21287e-10	0.705768	1	0.992	3.15289e-06
Cdh11	2.26949e-10	-0.660486	0.505	0.776	3.23357e-06
Zfp560	2.33262e-10	-1.11414	0.242	0.536	3.32352e-06
Gpx1	2.37721e-10	-0.900989	0.126	0.484	3.38705e-06
Ndufa13	2.38878e-10	-0.556657	0.989	1	3.40353e-06
Slc25a39	2.44052e-10	-0.571842	0.632	0.864	3.47725e-06
Paqr7	2.47588e-10	-0.529667	0.021	0.292	3.52763e-06
Snx6	2.55372e-10	-0.776306	0.505	0.748	3.63855e-06
Gid4	2.63672e-10	-0.826472	0.116	0.484	3.7568e-06
LOC100911266	2.65315e-10	-0.543819	0.453	0.796	3.78021e-06
Dleu7	2.74904e-10	-0.981208	0.021	0.288	3.91683e-06
Cisd2	2.79936e-10	-0.525434	0.968	0.984	3.98853e-06
Ppp1r12a	2.81614e-10	1.29758	0.905	0.796	4.01243e-06
Rgs12	2.8211e-10	-1.71841	0.084	0.36	4.01951e-06
Ndufab1	2.82289e-10	-0.572468	0.989	0.992	4.02205e-06
Vps36	2.93075e-10	-0.90807	0.453	0.716	4.17574e-06
Pxylp1	3.164e-10	-0.873383	0.116	0.464	4.50806e-06
Ubl3	3.16572e-10	-0.579745	0.526	0.772	4.51051e-06
Btbd3	3.20287e-10	1.48224	0.768	0.6	4.56345e-06
Pom121.1	3.2663e-10	-0.560264	0.021	0.276	4.65383e-06
Wscd1	3.27771e-10	-0.857641	0.263	0.588	4.67008e-06
Mtx2	3.28139e-10	-0.752202	0.621	0.804	4.67533e-06
Sirt3	3.34443e-10	-0.676378	0.432	0.712	4.76514e-06
Adprh	3.42351e-10	-0.729341	0.505	0.776	4.87782e-06
Kcnk3	3.42881e-10	-0.819112	0.147	0.48	4.88537e-06
LOC100125384-Nell1	3.49939e-10	1.38961	0.389	0.136	4.98593e-06
Klf12	3.55142e-10	-0.722169	0.474	0.764	5.06006e-06
Aaed1	3.80834e-10	-0.818741	0.074	0.392	5.42613e-06
Gtf2h5	3.82419e-10	-0.555524	0.947	0.976	5.44871e-06
Gdf11	3.84455e-10	-0.704431	0.442	0.72	5.47771e-06
LOC102551133	3.87127e-10	-0.583103	0.705	0.908	5.51579e-06
Gda	4.05666e-10	-0.789272	0.884	0.944	5.77993e-06
Mtfr1l	4.10363e-10	-0.771489	0.474	0.752	5.84685e-06
Sdhc	4.15507e-10	-0.516076	0.916	0.972	5.92014e-06
Mrpl17	4.24943e-10	-0.58543	0.884	0.96	6.05459e-06
LOC363337	4.38996e-10	-0.595514	0.042	0.36	6.25482e-06
Mrps35	4.42277e-10	-0.549007	0.674	0.86	6.30157e-06
Cachd1	4.70018e-10	1.37641	0.358	0.092	6.69681e-06
Zfp804a	4.72118e-10	-0.965623	0.495	0.704	6.72673e-06
Nnt	5.05165e-10	-0.731554	0.053	0.376	7.1976e-06
Mecr	5.10077e-10	-0.819112	0.084	0.404	7.26758e-06
Camkv	5.1037e-10	1.08253	0.884	0.7	7.27176e-06
Sarm1	5.16453e-10	-0.823239	0.263	0.592	7.35842e-06
Rgs8	5.35149e-10	-1.4117	0.168	0.444	7.6248e-06
Cdh18	5.36449e-10	-0.540474	0.074	0.404	7.64333e-06
Slc25a33	5.42129e-10	-0.824976	0.326	0.632	7.72425e-06
Ubac1	5.46787e-10	-0.526986	0.516	0.796	7.79062e-06
Mmp16	5.53831e-10	-0.705829	0.695	0.872	7.89098e-06
Tmem33	5.55859e-10	-0.561542	0.642	0.844	7.91988e-06
AABR07006480.1	5.58305e-10	-0.921079	0	0.216	7.95472e-06
Dusp6	5.75197e-10	1.22214	0.432	0.176	8.19541e-06
Usp24	6.06417e-10	1.3116	0.853	0.676	8.64023e-06
Rabac1	6.40452e-10	-0.553847	0.968	0.988	9.12516e-06
Rita1	6.44838e-10	-0.745064	0.168	0.52	9.18766e-06
Rab40b	6.51797e-10	1.38563	0.358	0.104	9.2868e-06
Gjd2	6.55928e-10	-0.738375	0.316	0.648	9.34566e-06
Tmem163	6.61906e-10	1.23758	0.211	0.016	9.43083e-06
Actr10	6.63089e-10	-0.642543	0.926	0.956	9.44769e-06
Cpeb1	6.69983e-10	-0.932288	0.105	0.416	9.54592e-06
Glb1	7.0152e-10	-0.732884	0.084	0.424	9.99526e-06
Tent5a	7.19749e-10	-0.777795	0.211	0.528	1.0255e-05
Cox17	7.31126e-10	-0.54466	0.979	0.984	1.04171e-05
Impa1	7.42472e-10	-0.666232	0.726	0.904	1.05787e-05
Cmc2	7.51942e-10	-0.612063	0.421	0.716	1.07137e-05
Gpsm1	7.63007e-10	-0.550437	0.495	0.788	1.08713e-05
Adcy8	7.67927e-10	1.44099	0.674	0.448	1.09414e-05
Rida	7.76043e-10	-0.823049	0.105	0.424	1.10571e-05
Fam135b	7.80198e-10	1.41711	0.716	0.488	1.11163e-05
Add3	8.19023e-10	1.36468	0.358	0.136	1.16694e-05
Bckdhb	8.28039e-10	-0.871252	0.284	0.608	1.17979e-05
Map6	8.33888e-10	-0.671555	0.432	0.732	1.18812e-05
1700037H04Rik	8.93821e-10	-0.688135	0.547	0.784	1.27352e-05
Klf6	9.00504e-10	-0.592096	0.663	0.828	1.28304e-05
Cab39	9.27888e-10	-0.507952	0.779	0.916	1.32206e-05
Pdhb	9.33961e-10	-0.607207	0.958	0.968	1.33071e-05
Scg5	9.66188e-10	-0.509982	0.958	0.972	1.37663e-05
Mrpl57	9.79283e-10	-0.579808	0.705	0.88	1.39528e-05
Pam16	9.92531e-10	-0.521199	0.842	0.928	1.41416e-05
Smap1	1.00479e-09	-0.517828	0.705	0.904	1.43162e-05
Sec61a1	1.00572e-09	-0.581229	0.505	0.76	1.43295e-05
Cnih2	1.00726e-09	0.929065	0.747	0.596	1.43514e-05
Taf1d	1.07703e-09	1.06425	0.958	0.876	1.53455e-05
Tango2	1.08295e-09	-0.608331	0.874	0.944	1.54299e-05
Rcn2	1.19729e-09	-0.532912	0.842	0.944	1.70589e-05
Card9-Dnlz	1.24493e-09	-0.60147	0.6	0.804	1.77377e-05
Nsmf	1.26506e-09	0.863419	0.979	0.88	1.80245e-05
Ddx17	1.2695e-09	1.0357	0.989	0.972	1.80878e-05
Dcun1d4	1.28766e-09	-0.887112	0.642	0.824	1.83466e-05
Dnajb9	1.29084e-09	-0.715615	0.442	0.732	1.83919e-05
Asb13	1.30449e-09	-0.582035	0.305	0.676	1.85864e-05
Ccdc136	1.32957e-09	-0.52714	0.726	0.904	1.89437e-05
Pygb	1.36292e-09	-0.589982	0.347	0.692	1.94189e-05
Mrps23	1.38746e-09	-0.729961	0.411	0.688	1.97686e-05
Reep1	1.41505e-09	-0.560834	0.768	0.924	2.01616e-05
Spcs2	1.41891e-09	-0.533944	0.884	0.952	2.02167e-05
Ptprs	1.43285e-09	0.82438	1	0.96	2.04152e-05
Mpdu1	1.43883e-09	-0.536016	0.305	0.684	2.05005e-05
Smim10l1	1.46509e-09	-0.611151	0.684	0.864	2.08747e-05
Rammet	1.49688e-09	-0.649326	0.632	0.82	2.13275e-05
Msrb2	1.49736e-09	-1.07339	0.074	0.324	2.13344e-05
Eif5a2	1.53333e-09	-0.769193	0.2	0.524	2.18469e-05
Arnt2	1.54859e-09	-0.729594	0.853	0.956	2.20643e-05
Etv1	1.55488e-09	1.1976	0.474	0.212	2.2154e-05
Fmc1	1.57483e-09	-0.677777	0.421	0.72	2.24382e-05
Slc25a5	1.58599e-09	-0.564511	0.726	0.924	2.25972e-05
Yars	1.61357e-09	-0.636474	0.926	0.952	2.29901e-05
Arhgef10l	1.65047e-09	-0.692654	0.137	0.492	2.35159e-05
Ivd	1.69118e-09	-0.633352	0.653	0.852	2.4096e-05
Rnaseh2a	1.7201e-09	-0.806011	0.411	0.668	2.45079e-05
Cpeb4	1.73885e-09	0.915258	0.916	0.76	2.47752e-05
Dbi	1.80799e-09	-0.522176	0.874	0.948	2.57602e-05
Stat1-250777	1.80856e-09	-0.822645	0.021	0.308	2.57683e-05
Tmem127	1.81838e-09	-0.666423	0.547	0.784	2.59083e-05
Timm10	1.82079e-09	-0.631637	0.768	0.896	2.59426e-05
Cndp2	1.84786e-09	-0.62799	0.358	0.664	2.63283e-05
Mblac2	1.88045e-09	-0.726016	0.411	0.692	2.67926e-05
Dock4	1.89147e-09	1.10453	0.8	0.648	2.69497e-05
Nppc	1.94154e-09	1.71514	0.242	0.06	2.7663e-05
Ccdc186	1.95441e-09	-0.532051	0.716	0.856	2.78465e-05
Coa3	1.9585e-09	-0.577801	0.705	0.868	2.79047e-05
Commd8	2.01675e-09	-0.797933	0.453	0.712	2.87346e-05
Mrpl22	2.04856e-09	-0.818551	0.305	0.652	2.91878e-05
Nrp2	2.04866e-09	1.61559	0.6	0.42	2.91893e-05
Fezf2	2.06206e-09	0.914618	0.158	0.004	2.93803e-05
Rgs10	2.09348e-09	-0.785373	0.747	0.848	2.98279e-05
Lgi3	2.12847e-09	-0.714525	0.221	0.548	3.03264e-05
Ctps2	2.18578e-09	-0.806225	0.242	0.548	3.1143e-05
Kcnk9	2.18846e-09	-0.578652	0.632	0.856	3.11812e-05
Snph	2.2221e-09	-0.661103	0.589	0.82	3.16605e-05
Pycr1	2.40406e-09	-0.547793	0.4	0.68	3.42531e-05
Pithd1	2.4949e-09	-0.647456	0.705	0.864	3.55473e-05
Ak2	2.60198e-09	-0.67257	0.032	0.324	3.7073e-05
C1qbp	2.73446e-09	-0.585244	0.937	0.964	3.89606e-05
Arhgap24	2.78788e-09	-0.64815	0	0.2	3.97217e-05
Polr2d	2.83656e-09	-0.681236	0.347	0.66	4.04153e-05
Sssca1	2.83936e-09	-0.608976	0.432	0.724	4.04552e-05
Sparc	2.8515e-09	-1.33306	0.242	0.508	4.06282e-05
Mir383	2.86397e-09	-0.610542	0.126	0.484	4.08059e-05
Glud1	2.86509e-09	-0.674489	0.642	0.836	4.08218e-05
Ndufa12	2.97203e-09	-0.513289	0.642	0.84	4.23455e-05
Tmem132e	3.0995e-09	-0.92343	0.074	0.364	4.41616e-05
Pou3f1	3.14612e-09	0.585649	0.158	0.004	4.48259e-05
Pex3	3.15237e-09	-0.637419	0.284	0.652	4.4915e-05
Srp9	3.21508e-09	-0.660213	0.926	0.936	4.58085e-05
Prox1	3.26572e-09	1.33982	0.263	0.048	4.653e-05
Tmem208	3.2953e-09	-0.721139	0.779	0.876	4.69514e-05
Chmp2b	3.36754e-09	-0.568442	0.642	0.824	4.79807e-05
Jmjd1c	3.4007e-09	1.28463	0.842	0.664	4.84532e-05
Apba2	3.47623e-09	0.921914	0.989	0.956	4.95293e-05
Msi2	3.50458e-09	-0.696813	0.158	0.516	4.99332e-05
Gch1	3.71737e-09	-0.981377	0.295	0.572	5.29651e-05
Mrps28	3.78447e-09	-0.804479	0.432	0.684	5.39212e-05
LOC100910558	3.92192e-09	1.43759	0.442	0.164	5.58795e-05
Mmgt1	3.93086e-09	-0.799757	0.179	0.48	5.60069e-05
Nek7	3.96989e-09	-0.814381	0.126	0.432	5.65629e-05
Unc13b	4.04972e-09	1.41127	0.442	0.236	5.77004e-05
P4ha2	4.05469e-09	1.47049	0.379	0.14	5.77712e-05
Rpp30	4.10997e-09	-0.935076	0.368	0.628	5.85588e-05
Ifit2	4.21559e-09	-0.822473	0.011	0.244	6.00638e-05
Synj2	4.23922e-09	1.32639	0.242	0.032	6.04004e-05
Naa20	4.25324e-09	-0.69299	0.674	0.82	6.06002e-05
Commd7	4.36037e-09	-0.552242	0.579	0.82	6.21266e-05
Itpk1	4.38959e-09	-0.783196	0.295	0.6	6.25428e-05
St6galnac6	4.48795e-09	-0.561495	0.232	0.58	6.39443e-05
Smim20	4.521e-09	-0.793962	0.274	0.56	6.44153e-05
Phb2	4.57386e-09	-0.547939	0.705	0.86	6.51684e-05
Mt1-Mt3-Mt2A	4.63378e-09	0.772807	0.937	0.88	6.60221e-05
Grk3	4.88169e-09	-0.775786	0.263	0.564	6.95543e-05
Slc35f4	5.03877e-09	-0.854481	0.074	0.368	7.17924e-05
Fam185a	5.1517e-09	-0.764072	0.179	0.496	7.34014e-05
Tex9	5.27517e-09	-0.901365	0.158	0.464	7.51606e-05
Samd10	5.32946e-09	-0.576565	0.242	0.54	7.59341e-05
Cdadc1	5.38677e-09	-0.659971	0.484	0.752	7.67507e-05
Chn2	5.39481e-09	1.33232	0.274	0.076	7.68653e-05
Slc41a3	5.49644e-09	-0.881084	0.137	0.44	7.83133e-05
NEWGENE-6497122	5.63242e-09	-0.728344	0.463	0.708	8.02507e-05
Apc2	5.76972e-09	-0.715962	0.421	0.7	8.2207e-05
Lgmn	5.86625e-09	-0.505573	0.432	0.724	8.35823e-05
Txnl4a-RGD1560212	6.07464e-09	-0.515831	0.958	0.968	8.65515e-05
Mrgpre	6.1426e-09	-0.765632	0.147	0.476	8.75197e-05
Clcn5	6.23573e-09	-0.506572	0.021	0.256	8.88467e-05
Ldhal6b-Tmem242	6.29606e-09	-0.694923	0.589	0.788	8.97062e-05
Retreg2	6.5165e-09	-0.583908	0.663	0.868	9.28471e-05
Slk	6.58661e-09	-0.561529	0.768	0.9	9.38461e-05
Cyp4x1	6.6205e-09	-0.780891	0.326	0.652	9.43288e-05
Mpc1	6.77496e-09	-0.690565	0.968	0.972	9.65296e-05
Park7	6.84874e-09	-0.517705	0.968	0.98	9.75808e-05
Slc25a26	6.85164e-09	-0.704293	0.095	0.42	9.76221e-05
LOC100912167	6.9905e-09	-0.503567	0.263	0.612	9.96006e-05
Mir6326	7.09869e-09	-0.636157	0.811	0.92	0.000101142
Galntl6	7.11448e-09	-0.654276	0.263	0.58	0.000101367
Tmem11	7.18198e-09	-0.558046	0.347	0.668	0.000102329
Tomm22	7.2576e-09	-0.558324	0.779	0.904	0.000103406
Stn1	7.41135e-09	-0.802002	0.158	0.492	0.000105597
Ifnar1	7.47968e-09	-0.711189	0.568	0.784	0.00010657
Fuca2	7.60648e-09	-0.850658	0.126	0.4	0.000108377
Dgkb	7.78667e-09	1.51815	0.632	0.48	0.000110945
1110008P14Rik	8.08419e-09	-0.573971	0.821	0.92	0.000115184
Net1	8.11117e-09	-0.847532	0.095	0.392	0.000115568
Pgls	8.3508e-09	-0.83808	0.621	0.824	0.000118982
Prpf4b	8.38429e-09	0.792904	0.989	0.98	0.000119459
Kcnmb2	8.43658e-09	-0.870201	0.232	0.52	0.000120204
Dcaf7	8.47613e-09	-0.749485	0.558	0.776	0.000120768
Etf1	8.51273e-09	-0.530909	0.579	0.816	0.000121289
Xxylt1	8.628e-09	-0.655247	0.179	0.548	0.000122932
Rps6ka5	8.79478e-09	-0.794083	0.463	0.684	0.000125308
Emc9	8.87931e-09	-0.877907	0.221	0.512	0.000126512
Ube2n	9.09372e-09	-0.574252	0.653	0.848	0.000129567
Pmpca	9.19173e-09	-0.644239	0.484	0.752	0.000130964
Mitf	9.26539e-09	-0.797094	0.042	0.34	0.000132013
Rora	9.46676e-09	-0.55035	0.105	0.404	0.000134882
Luc7l3	9.73417e-09	1.02431	0.979	0.992	0.000138693
Ankrd34c	9.93733e-09	-0.955662	0.021	0.252	0.000141587
Epha3-U4	9.94089e-09	-1.05837	0.137	0.416	0.000141638
Sacm1l	1.0085e-08	-0.82865	0.474	0.688	0.000143692
LOC100909559	1.03493e-08	-0.799039	0.053	0.352	0.000147457
Ptrhd1	1.04748e-08	-0.735425	0.137	0.444	0.000149244
Rock1	1.05166e-08	1.41554	0.958	0.92	0.000149841
Zfand1	1.05492e-08	-0.923266	0.021	0.276	0.000150305
Plk3	1.08652e-08	-0.77143	0.126	0.432	0.000154807
Ttc1	1.11071e-08	-0.549061	0.789	0.904	0.000158254
Tmem229a	1.1521e-08	-1.01851	0.011	0.252	0.000164151
Arhgap21	1.24626e-08	1.63529	0.695	0.572	0.000177566
Slc45a4	1.26692e-08	-0.664936	0.2	0.524	0.000180511
Hibch	1.28224e-08	-0.627465	0.168	0.512	0.000182694
AABR07059778.1-Nxph1	1.28651e-08	-0.877708	0.137	0.436	0.000183302
Pofut2	1.28961e-08	-0.654418	0.337	0.628	0.000183744
Slc30a9	1.29191e-08	-0.568912	0.695	0.872	0.000184072
Chst1	1.32645e-08	1.07768	0.674	0.496	0.000188993
Idnk	1.36054e-08	-0.624868	0	0.184	0.00019385
Cnih1	1.36104e-08	-0.567842	0.737	0.9	0.000193921
Adgrb2	1.36662e-08	0.917712	0.411	0.22	0.000194716
Mmut	1.38811e-08	-0.769975	0.116	0.424	0.000197778
Pigt	1.42958e-08	-0.555268	0.516	0.76	0.000203687
Spint2	1.44491e-08	0.84875	0.358	0.132	0.000205871
Glrb	1.47835e-08	-0.719854	0.621	0.796	0.000210635
Fhl1	1.48626e-08	-0.605704	0.832	0.932	0.000211762
Tpm2	1.49095e-08	-0.743703	0.011	0.224	0.000212431
Zfp180	1.49493e-08	-0.747613	0.368	0.66	0.000212998
Coq3	1.49804e-08	-0.776311	0.263	0.532	0.000213441
Timm22	1.52411e-08	-0.513897	0.505	0.748	0.000217155
Atox1	1.52797e-08	-0.527618	0.905	0.932	0.000217706
Rilpl1	1.53093e-08	-0.762457	0.263	0.552	0.000218126
Fsd1	1.53581e-08	-0.662781	0.547	0.78	0.000218823
Tex52	1.56265e-08	-0.804815	0.053	0.32	0.000222647
Apoo	1.59318e-08	-0.746884	0.558	0.756	0.000226997
Csmd2	1.59377e-08	1.57545	0.326	0.14	0.000227081
Tmem167a	1.59523e-08	-0.565888	0.663	0.828	0.000227288
Dcn	1.61975e-08	1.80682	0.168	0.024	0.000230782
Prxl2a	1.65691e-08	-0.696743	0.589	0.772	0.000236076
Yipf1	1.67828e-08	-0.691813	0.526	0.772	0.000239121
Kcnv1	1.73646e-08	1.28782	0.232	0.032	0.00024741
Tmem184b	1.74036e-08	-0.523178	0.337	0.648	0.000247966
Htr2a	1.84106e-08	-0.816857	0.147	0.448	0.000262315
Grin2d	1.8462e-08	-0.577315	0.011	0.212	0.000263047
Cdk5	1.86087e-08	-0.508593	0.716	0.868	0.000265137
Mcrip1	1.96369e-08	-0.503315	0.779	0.904	0.000279787
LOC103694210	1.96704e-08	0.936168	0.253	0.04	0.000280264
Mrps7	1.98377e-08	-0.566043	0.684	0.844	0.000282648
Tspan6	1.98469e-08	-0.622859	0.442	0.704	0.000282779
3830406C13Rik	2.00485e-08	-0.781896	0.558	0.74	0.000285652
Htr1f	2.01526e-08	-0.714909	0	0.18	0.000287135
Ddah2	2.0168e-08	-0.714707	0.432	0.692	0.000287353
Mfsd11	2.0339e-08	-0.670956	0.168	0.496	0.00028979
Sarnp	2.05937e-08	-0.583447	0.495	0.788	0.000293419
Nrcam	2.0788e-08	0.824129	1	0.976	0.000296187
Tnrc6c	2.1394e-08	1.13519	0.821	0.688	0.000304822
Mrpl28	2.15411e-08	-0.527444	0.705	0.876	0.000306917
LOC100910945	2.18998e-08	-0.651642	0.032	0.332	0.000312028
Ppa1	2.19653e-08	-0.516307	0.884	0.948	0.000312961
Tpst1	2.2322e-08	-0.552415	0.474	0.736	0.000318045
Ibsp	2.24911e-08	-0.968276	0.021	0.244	0.000320453
Praf2	2.27883e-08	-0.535523	0.674	0.852	0.000324688
Pitpnm3	2.31545e-08	-0.96512	0.021	0.228	0.000329906
Cstf2	2.3194e-08	1.2535	0.8	0.708	0.000330468
Rfx3	2.34675e-08	1.09717	0.337	0.112	0.000334365
Slc38a1	2.39457e-08	-0.636866	0.242	0.556	0.000341178
Nceh1	2.41754e-08	-0.598961	0.642	0.824	0.00034445
Ufsp2	2.49834e-08	-0.598515	0.674	0.852	0.000355963
Hddc3	2.51866e-08	-0.635919	0.158	0.488	0.000358859
Vps11	2.52874e-08	-0.563892	0.274	0.6	0.000360296
Prkra	2.58927e-08	-0.698064	0.274	0.564	0.000368919
Tmem256	2.60541e-08	-0.507585	0.811	0.884	0.000371219
Unc5a	2.63963e-08	0.812925	0.347	0.12	0.000376094
Ctxn1	2.64219e-08	0.554022	0.358	0.136	0.00037646
Dcbld2	2.65248e-08	-0.729296	0.305	0.636	0.000377926
Dnajc12	2.65797e-08	-0.576048	0.074	0.392	0.000378708
Ptges2	2.66284e-08	-0.668443	0.516	0.732	0.000379401
Coq2	2.66905e-08	-0.722046	0.242	0.532	0.000380286
Clptm1	2.67007e-08	-0.584051	0.642	0.84	0.000380431
Adamts8	2.70876e-08	-1.36719	0.074	0.284	0.000385944
2310061I04Rik	2.71446e-08	-0.559732	0.526	0.728	0.000386757
Tmem41a	2.7391e-08	-0.665384	0.232	0.54	0.000390268
Fam162a	2.74559e-08	-0.54197	0.884	0.928	0.000391191
Fbxl17	2.78333e-08	-0.609331	0.305	0.608	0.000396569
Vsig10l	2.8201e-08	-0.641854	0.011	0.22	0.000401808
B3galt1	2.84083e-08	-0.781355	0.147	0.468	0.000404761
Sall2	2.84203e-08	-0.768746	0.095	0.364	0.000404932
Hapln1	2.90975e-08	-1.79984	0.011	0.2	0.000414582
Abhd17b	2.92799e-08	-0.662723	0.716	0.856	0.00041718
Ier2	2.96526e-08	1.41181	0.316	0.124	0.000422491
LOC100910054	3.02203e-08	-0.705553	0.147	0.468	0.000430578
Rangrf	3.08148e-08	-0.588964	0.032	0.316	0.00043905
Fnta	3.08986e-08	-0.604052	0.453	0.708	0.000440243
Pde4d	3.09767e-08	-0.549953	0.737	0.876	0.000441356
Mrpl10	3.12582e-08	-0.794261	0.242	0.548	0.000445366
Sec14l2	3.1276e-08	-0.5308	0.011	0.276	0.000445621
Depdc5	3.14501e-08	-0.500627	0.168	0.488	0.0004481
Cckbr	3.25168e-08	1.0427	0.211	0.036	0.0004633
Fosb	3.30175e-08	1.40232	0.221	0.06	0.000470433
Htr3a	3.43194e-08	-0.99959	0.021	0.252	0.000488983
Ccdc127	3.59591e-08	-0.542487	0.621	0.828	0.000512345
Miga1	3.6197e-08	-0.683302	0.505	0.752	0.000515735
Rab4a	3.75877e-08	-0.527245	0.589	0.808	0.00053555
Plbd2	3.77668e-08	-0.627184	0.284	0.588	0.000538101
Bnip3	3.84909e-08	-0.578907	0.621	0.828	0.000548418
Harbi1	3.86708e-08	-0.682612	0.063	0.34	0.000550981
Wasl	3.88479e-08	-0.583332	0.779	0.888	0.000553505
Srrm2	3.97269e-08	0.957828	0.989	0.996	0.000566028
Tbr1	4.00301e-08	1.24171	0.168	0.008	0.000570348
Apeh	4.06236e-08	-1.0026	0.211	0.48	0.000578805
Eif2s3	4.23553e-08	-0.52138	0.558	0.78	0.000603479
Tmem196	4.29984e-08	-0.761758	0.084	0.376	0.000612641
Cox7b2	4.40404e-08	-0.683097	0	0.172	0.000627487
Smc5	4.58241e-08	1.24938	0.758	0.648	0.000652902
AABR07033229.1	4.62458e-08	-0.7623	0.011	0.228	0.000658911
Mgat5b	4.67169e-08	-0.625981	0.074	0.396	0.000665622
Cspg5	4.75703e-08	-0.639184	0.579	0.836	0.000677782
Ccdc97	4.76853e-08	-0.763152	0.284	0.564	0.00067942
Fuca1	4.96294e-08	-0.5987	0.137	0.44	0.000707119
2300009A05Rik-Iqch	5.02838e-08	-0.721281	0.274	0.576	0.000716443
Gpm6a	5.08394e-08	0.590092	1	0.984	0.00072436
St18	5.09013e-08	1.23506	0.316	0.068	0.000725242
Rxrg	5.23449e-08	0.890779	0.147	0.012	0.00074581
Psma3l-Psma3	5.29201e-08	-0.531363	0.905	0.956	0.000754005
Nhsl1.2	5.38638e-08	1.02891	0.137	0.008	0.000767451
Qdpr	5.50976e-08	-0.500056	0.589	0.78	0.000785031
Scn1b	5.52594e-08	-0.75727	0.4	0.672	0.000787336
Pde10a	5.57826e-08	1.18887	0.905	0.788	0.00079479
Ermp1	5.71792e-08	-0.610019	0.242	0.58	0.00081469
Psme1	5.76358e-08	-0.655023	0.463	0.704	0.000821194
Asap1	5.77072e-08	-0.598891	0.642	0.824	0.000822213
Cd302	5.90174e-08	-1.03581	0.011	0.216	0.000840879
Rps19bp1	6.10737e-08	-0.521674	0.705	0.888	0.000870178
Nkd2	6.2243e-08	-0.70463	0.105	0.376	0.000886839
Ndufaf2	6.29419e-08	-0.522888	0.432	0.712	0.000896796
Lamtor5	6.37202e-08	-0.564945	0.537	0.764	0.000907885
Ptms	6.39978e-08	0.803884	0.821	0.744	0.000911841
Slc8a2	6.42606e-08	1.07424	0.4	0.188	0.000915585
Creb3	6.45503e-08	-0.529653	0.526	0.772	0.000919712
Sgcz	6.49784e-08	-0.551584	0	0.168	0.000925812
Scn2a	6.75627e-08	1.01371	0.947	0.852	0.000962633
Rpl10a-148169	6.82363e-08	-0.529718	0.421	0.728	0.000972231
Cox10	6.87414e-08	-0.647433	0.105	0.424	0.000979428
Luzp1	6.88351e-08	-0.815331	0.347	0.592	0.000980762
Smim19	6.96477e-08	-0.700796	0.232	0.528	0.00099234
LOC100909912	7.02527e-08	-0.731562	0.221	0.52	0.00100096
Rnf112	7.21106e-08	1.19204	0.432	0.208	0.00102743
Ranbp6	7.21803e-08	-0.666086	0.453	0.676	0.00102842
Hmgcll1	7.25517e-08	-0.644415	0.126	0.408	0.00103372
Arsg	7.28165e-08	-0.664512	0.011	0.196	0.00103749
Ube2f	7.44653e-08	-0.590939	0.4	0.636	0.00106098
Shisa8	7.46666e-08	-0.781933	0.084	0.356	0.00106385
Rnf217	7.47354e-08	1.17889	0.253	0.08	0.00106483
Tm2d3	7.66655e-08	-0.563246	0.347	0.668	0.00109233
Chpf	7.76561e-08	-0.573382	0.653	0.832	0.00110644
Tnr	8.20712e-08	-0.614825	0.147	0.488	0.00116935
Pusl1	8.36453e-08	-0.804703	0.263	0.6	0.00119178
Mrpl15	8.46501e-08	-0.549277	0.737	0.844	0.00120609
Dennd5a	8.50771e-08	-0.516192	0.621	0.824	0.00121218
Dnaja4	8.72714e-08	-0.538391	0.316	0.632	0.00124344
Ptprk	8.78354e-08	0.909126	0.263	0.056	0.00125148
Kctd10	8.91615e-08	-0.765177	0.063	0.34	0.00127037
Ptchd4	9.04888e-08	-0.740147	0.179	0.436	0.00128929
Rgs4	9.18881e-08	1.10364	0.853	0.692	0.00130922
Prkci	9.37105e-08	-0.604729	0.284	0.572	0.00133519
Kcnd3	9.45293e-08	-0.759529	0.642	0.816	0.00134685
Pnkd-249879	9.45664e-08	-0.554007	0.453	0.696	0.00134738
Pnisr	9.46088e-08	1.08371	0.989	0.96	0.00134799
Hnrnpu	9.48647e-08	0.802171	1	0.988	0.00135163
Nhs	9.57502e-08	-0.611937	0	0.164	0.00136425
Ap3s2	9.77316e-08	-0.551397	0.558	0.768	0.00139248
Bcl2l2	9.91031e-08	-0.790839	0.463	0.704	0.00141202
AABR07040855.1	1.00612e-07	-0.666969	0.158	0.472	0.00143352
Slc45a1	1.04244e-07	-0.627158	0.642	0.8	0.00148526
Gpank1	1.06943e-07	-0.835561	0.137	0.396	0.00152372
Itga6	1.08391e-07	1.23761	0.242	0.04	0.00154435
Lrrc7	1.08789e-07	0.943255	0.895	0.784	0.00155002
Acsf3	1.09401e-07	-0.546544	0.021	0.228	0.00155874
Acer3	1.11215e-07	-0.604708	0.168	0.472	0.0015846
Pip4p1	1.11345e-07	-0.517233	0.768	0.892	0.00158644
Fat4	1.11913e-07	1.17889	0.242	0.056	0.00159453
Kcnj11	1.12865e-07	-0.630942	0.042	0.32	0.0016081
Chst8	1.14039e-07	0.960065	0.179	0.016	0.00162482
Gyg1	1.16511e-07	-0.791817	0.505	0.704	0.00166004
LOC691921	1.18019e-07	-0.569021	0.295	0.592	0.00168154
Cox16	1.1885e-07	-0.551768	0.589	0.812	0.00169337
LOC108349515	1.19221e-07	-0.713957	0.032	0.264	0.00169866
Inpp5a	1.19256e-07	-0.689164	0.179	0.504	0.00169916
Cntn5	1.19382e-07	-0.781837	0.137	0.444	0.00170095
Sco1	1.19968e-07	-0.776262	0.084	0.328	0.0017093
Nck1	1.20159e-07	-0.768316	0.2	0.504	0.00171202
Hspa9	1.20723e-07	-0.588378	0.189	0.52	0.00172006
Ndst3	1.20795e-07	1.62241	0.284	0.116	0.00172109
AABR07072236.1	1.23203e-07	0.752375	0.242	0.036	0.00175539
Map11	1.23268e-07	-0.714175	0.495	0.704	0.00175633
Tfb2m	1.26568e-07	-0.521658	0.095	0.416	0.00180335
Slc1a4	1.27052e-07	-0.541709	0.2	0.516	0.00181023
Yif1a	1.29019e-07	-0.621445	0.179	0.476	0.00183827
Atp23	1.32503e-07	-0.797789	0.011	0.188	0.0018879
Tle4	1.35812e-07	1.16674	0.389	0.188	0.00193505
Cxcl14	1.36543e-07	-1.48648	0.032	0.232	0.00194547
F2r	1.37296e-07	-0.639929	0.168	0.496	0.00195619
GL.9538	1.4092e-07	-0.587787	0	0.16	0.00200783
Wars	1.42424e-07	-0.634391	0.611	0.8	0.00202925
Atpaf2	1.43472e-07	-0.571255	0.389	0.664	0.00204419
Tead1	1.46047e-07	0.940827	0.211	0.028	0.00208088
Rad21-AABR07057872.1	1.46756e-07	-0.627465	0.326	0.616	0.00209098
Tacr3	1.49173e-07	1.30631	0.126	0.008	0.00212541
Negr1	1.50831e-07	1.39871	0.726	0.5	0.00214904
Tex264	1.55143e-07	-0.521226	0.695	0.872	0.00221048
Lhfpl5	1.56781e-07	-0.518101	0.147	0.464	0.00223382
LOC108352127	1.64402e-07	-0.609049	0.621	0.808	0.0023424
Btbd11	1.6504e-07	-0.698048	0.126	0.416	0.00235149
Flii	1.66976e-07	-0.669864	0.579	0.764	0.00237908
Btbd1	1.67262e-07	-0.557561	0.747	0.88	0.00238315
Gab2	1.68092e-07	-0.776709	0.126	0.404	0.00239498
Fdps-122885	1.6874e-07	-0.630562	0.758	0.904	0.00240421
Mrpl34	1.70679e-07	-0.633551	0.516	0.792	0.00243184
Frmd5	1.7244e-07	-0.536092	0.337	0.648	0.00245693
Tbc1d23	1.8404e-07	-0.517669	0.295	0.608	0.0026222
Xrn1	1.86892e-07	1.41161	0.674	0.56	0.00266284
Dpp7	2.00614e-07	-0.518287	0.779	0.88	0.00285835
Pgd	2.0187e-07	-0.546958	0.516	0.732	0.00287624
Vezt	2.05064e-07	-0.62051	0.474	0.692	0.00292176
Cox8b	2.07148e-07	-0.596636	0	0.156	0.00295144
Nr2e1	2.07148e-07	-0.567584	0	0.156	0.00295144
Tdh	2.07148e-07	-0.553885	0	0.156	0.00295144
Rassf5	2.07888e-07	-0.657006	0.063	0.344	0.00296199
Eipr1	2.11472e-07	-0.685339	0.316	0.6	0.00301305
Lmo1	2.15736e-07	0.971201	0.189	0.028	0.00307381
Psmg1	2.16351e-07	-0.593197	0.411	0.664	0.00308256
9330182L06Rik	2.2382e-07	-0.586429	0.505	0.796	0.00318899
Susd4	2.24212e-07	1.00613	0.726	0.564	0.00319457
Adarb2-094878	2.24284e-07	-1.96159	0.074	0.26	0.00319559
Tnfaip1	2.2711e-07	-0.665652	0.316	0.588	0.00323586
Ppm1l	2.2906e-07	-0.610873	0.895	0.924	0.00326364
Fbxw11	2.30274e-07	-0.573451	0.537	0.732	0.00328094
AABR07071659.2	2.35041e-07	-0.617805	0.021	0.232	0.00334886
Txnl4b	2.38845e-07	-0.795786	0.095	0.364	0.00340306
Bmp2	2.41268e-07	-0.526231	0.021	0.252	0.00343759
Abcd2	2.42677e-07	-0.718815	0.158	0.444	0.00345766
Lyl1	2.47269e-07	0.640371	0.305	0.052	0.00352309
Med20	2.47581e-07	-0.621939	0.116	0.404	0.00352753
mrpl9	2.63115e-07	-0.768793	0.558	0.724	0.00374886
Dync1i1	2.63422e-07	0.830799	0.884	0.748	0.00375324
Lrrc59	2.6529e-07	-0.569687	0.484	0.712	0.00377985
AC120066.1	2.76526e-07	-0.517211	0.158	0.464	0.00393994
LOC108351137-174229	2.91563e-07	-0.544758	0.989	1	0.00415419
Mlf1	2.96223e-07	-1.05593	0.053	0.276	0.00422058
Zmiz1-AABR07024498.1	2.9758e-07	1.28864	0.684	0.56	0.00423992
Lamp2	2.97821e-07	-0.667926	0.316	0.616	0.00424335
Slc36a1	2.99087e-07	-0.784404	0.305	0.572	0.00426139
Pdik1l	3.05206e-07	-0.589111	0.179	0.476	0.00434857
MGC109340	3.09044e-07	1.19787	0.632	0.46	0.00440326
Pgm1	3.12739e-07	-0.816674	0.379	0.6	0.0044559
Kctd7	3.17672e-07	-0.630248	0.042	0.268	0.00452619
Azi2	3.21155e-07	-0.542749	0.411	0.652	0.00457582
Psmg3	3.23471e-07	-0.50699	0.632	0.812	0.00460882
Coq6	3.23986e-07	-0.622072	0.232	0.496	0.00461616
Necab3-156863	3.28625e-07	1.37628	0.232	0.044	0.00468225
Cmtr1	3.33389e-07	-0.711856	0.4	0.656	0.00475012
Col5a1	3.33649e-07	1.30517	0.232	0.08	0.00475383
Acadm	3.33954e-07	-0.950417	0.032	0.248	0.00475817
Dusp10	3.41791e-07	-0.508034	0.021	0.22	0.00486983
Mllt3	3.47732e-07	1.51587	0.705	0.568	0.00495449
Ptger3	3.48976e-07	1.27072	0.326	0.168	0.00497221
Ranbp9	3.49586e-07	-0.579245	0.432	0.684	0.00498091
Cul4b-C1galt1c1	3.53177e-07	-0.543947	0.547	0.764	0.00503207
Osbp	3.56283e-07	-0.522961	0.347	0.636	0.00507632
Panx2	3.5995e-07	-0.570016	0.211	0.54	0.00512857
Cttnbp2	3.60509e-07	1.06031	0.884	0.78	0.00513654
Capza1	3.66652e-07	-0.67133	0.389	0.66	0.00522406
Akap7	3.69091e-07	-0.688135	0.168	0.496	0.0052588
E130309D02Rik	3.80804e-07	-0.551039	0.179	0.508	0.00542569
Pacsin2	3.84181e-07	-0.64624	0.253	0.536	0.00547382
Gabrg3	3.96677e-07	-0.847614	0.642	0.768	0.00565186
LOC102555617	3.97424e-07	1.20036	0.368	0.176	0.0056625
Gabrg1	3.98964e-07	-0.755183	0.221	0.476	0.00568444
Ncoa3	3.99449e-07	-0.62652	0.168	0.484	0.00569135
Nup43	4.00683e-07	-1.01234	0.116	0.36	0.00570893
Pdcd10	4.02598e-07	-0.520029	0.726	0.848	0.00573622
Ift57	4.02879e-07	-0.776013	0.653	0.764	0.00574022
Nectin1	4.10268e-07	-0.583981	0.453	0.704	0.00584549
Cd9	4.40116e-07	1.42297	0.147	0.008	0.00627078
Pitrm1	4.46127e-07	-0.682001	0.189	0.476	0.00635642
Anxa11	4.58506e-07	0.918313	0.316	0.112	0.00653279
Carhsp1	4.58998e-07	-0.757367	0.011	0.192	0.00653981
Kctd9	4.63727e-07	-0.738911	0.032	0.244	0.00660718
Cdc34	4.71119e-07	-0.567489	0.337	0.636	0.00671251
Fndc5	4.73118e-07	-0.583423	0.358	0.636	0.00674098
Kyat3	4.7417e-07	-0.750067	0.105	0.368	0.00675598
Commd9	4.74654e-07	-0.517115	0.621	0.788	0.00676287
Myadml2	4.85646e-07	-0.545796	0.032	0.272	0.00691948
Myt1l	4.87025e-07	0.972667	0.947	0.872	0.00693913
Mrpl2	4.90982e-07	-0.653799	0.284	0.56	0.00699552
Slit2	5.00079e-07	1.32436	0.663	0.48	0.00712513
Nr1d2	5.22655e-07	-0.761758	0.158	0.412	0.00744679
Cggbp1	5.25286e-07	-0.588701	0.158	0.46	0.00748427
Atic	5.35022e-07	-0.662534	0.074	0.316	0.00762299
Hint3	5.3848e-07	-0.727621	0.105	0.348	0.00767226
Lyst	5.42169e-07	1.11479	0.758	0.632	0.00772482
Rabl3	5.42949e-07	-0.615557	0.063	0.348	0.00773594
Khk	5.47334e-07	-0.786844	0.116	0.376	0.00779842
Gpcpd1	5.50724e-07	-0.503212	0.232	0.5	0.00784671
Fam160b2	5.79622e-07	-0.512261	0.211	0.528	0.00825845
Chmp1b-Gnal	5.80804e-07	-0.75166	0.232	0.524	0.00827529
Prok2	5.82716e-07	-0.74563	0.053	0.312	0.00830254
Rhbdd3	5.87531e-07	-0.530104	0.137	0.468	0.00837114
Tgoln2	5.88178e-07	-0.53123	0.316	0.616	0.00838036
Lenep-Flad1	6.01336e-07	-0.506369	0.179	0.472	0.00856784
Lmo4	6.01466e-07	-0.576715	0.811	0.912	0.00856969
Klf15	6.08859e-07	-0.551968	0.042	0.284	0.00867503
Sparcl1	6.2583e-07	-1.03443	0.716	0.792	0.00891683
Pc	6.33394e-07	-0.596301	0.411	0.668	0.00902459
Abhd2	6.35354e-07	-0.681356	0.474	0.68	0.00905253
Gng4	6.35957e-07	-0.614347	0.316	0.6	0.00906112
Btg2	6.36855e-07	1.36274	0.274	0.128	0.0090739
Neu1	6.43356e-07	-0.526008	0.316	0.608	0.00916654
Tac3	6.53361e-07	-1.1026	0	0.144	0.00930909
Trim37	6.58233e-07	-0.53482	0.726	0.84	0.0093785
Mrpl48	6.59694e-07	-0.530047	0.821	0.892	0.00939931
Scn3a	6.60284e-07	0.778738	0.926	0.852	0.00940773
Uba3	6.61943e-07	-0.630304	0.274	0.568	0.00943136
Mboat2	6.95139e-07	-0.537124	0.379	0.644	0.00990434
Rxfp1	7.10475e-07	-0.928933	0.105	0.36	0.0101228
Podxl2	7.12523e-07	-0.614738	0.211	0.528	0.010152
Acss2	7.13665e-07	-0.547857	0.516	0.736	0.0101683
Itgae	7.32456e-07	-0.590561	0.053	0.3	0.010436
R3hdm1	7.37201e-07	0.886083	0.968	0.932	0.0105036
Fmr1	7.40394e-07	-0.684343	0.305	0.584	0.0105491
Slc9a3r2	7.44109e-07	-0.616622	0.4	0.648	0.0106021
Mcts1	7.51527e-07	-0.557833	0.811	0.884	0.0107078
Caskin1	7.54089e-07	-0.623363	0.547	0.752	0.0107443
Cdc25a	7.55767e-07	-0.631719	0.042	0.28	0.0107682
Tapt1	7.64195e-07	-0.668995	0.189	0.464	0.0108883
Cd24	7.70289e-07	-1.07779	0.305	0.512	0.0109751
Iqgap1	7.70614e-07	1.50658	0.358	0.2	0.0109797
Car12	7.71348e-07	0.781394	0.137	0.004	0.0109902
Ghdc	7.75334e-07	-0.572245	0.032	0.284	0.011047
Cat	7.9377e-07	-0.708545	0.368	0.616	0.0113096
Amigo2	7.99278e-07	1.17815	0.221	0.048	0.0113881
St8sia4	8.00453e-07	-0.672391	0.032	0.276	0.0114048
Slc17a6	8.29069e-07	1.43849	0.158	0.024	0.0118126
LOC100912247	8.47565e-07	-0.640579	0.116	0.384	0.0120761
Nwd2	8.68696e-07	1.23208	0.253	0.084	0.0123772
Nrp1-Mir1903	8.93967e-07	0.965256	0.474	0.252	0.0127372
AABR07024441.1	9.03196e-07	-0.696399	0.147	0.396	0.0128687
Plekhg5	9.49714e-07	1.03844	0.2	0.064	0.0135315
AABR07043823.2	9.56022e-07	-0.551584	0	0.14	0.0136214
Synpr	9.5689e-07	0.897492	0.695	0.504	0.0136338
Them4	9.69659e-07	-0.594404	0.116	0.396	0.0138157
Hsd17b7	9.73887e-07	-0.705674	0.411	0.648	0.0138759
Ctif	1.00233e-06	-0.650955	0.168	0.464	0.0142812
Pole4	1.0084e-06	-0.663297	0.221	0.52	0.0143677
Crhbp	1.01604e-06	-1.2594	0.011	0.196	0.0144766
Klhdc8b	1.01819e-06	1.00477	0.884	0.78	0.0145072
Cyb561d2	1.0241e-06	-0.598691	0.442	0.668	0.0145914
Mrpl3	1.03995e-06	-0.618073	0.505	0.724	0.0148171
Vgll4	1.0416e-06	0.999294	0.474	0.296	0.0148407
Homer2	1.05781e-06	-0.57562	0.126	0.396	0.0150717
Agpat4	1.10497e-06	0.96552	0.695	0.556	0.0157436
Fut9	1.17812e-06	-0.633447	0.158	0.452	0.0167859
Vamp1	1.19228e-06	-0.510324	0.305	0.576	0.0169876
Egr4	1.24871e-06	0.937507	0.158	0.024	0.0177916
Rtfdc1	1.27433e-06	-0.593983	0.379	0.628	0.0181567
Crat	1.28025e-06	-0.57771	0.495	0.728	0.018241
Adarb2-094873	1.28314e-06	-1.42217	0.084	0.288	0.0182821
Stxbp6	1.29517e-06	-1.06667	0.042	0.268	0.0184537
Akr7a2	1.30776e-06	-0.677864	0.042	0.292	0.018633
Chchd1	1.31239e-06	-0.516061	0.874	0.932	0.0186989
Psmd10	1.35652e-06	-0.626198	0.053	0.24	0.0193277
Zdhhc20	1.35665e-06	-0.594829	0.442	0.696	0.0193296
Camkk1	1.36093e-06	-0.582135	0.084	0.348	0.0193906
Rab9a	1.38007e-06	-0.517801	0.189	0.496	0.0196633
Nudcd1	1.44528e-06	-0.746617	0.084	0.336	0.0205924
Tet1	1.459e-06	-0.700365	0.105	0.38	0.0207878
Dip2a	1.46484e-06	-0.504512	0.316	0.596	0.020871
Tmed1	1.47396e-06	-0.807671	0.042	0.248	0.0210009
Trim62	1.48275e-06	-0.537512	0.032	0.252	0.0211263
Rian	1.5166e-06	0.610972	1	0.984	0.0216085
Deptor	1.5623e-06	-0.789635	0.126	0.392	0.0222596
Ube2j1	1.57065e-06	-0.505394	0.558	0.744	0.0223786
Ing3	1.57801e-06	-0.559545	0.189	0.448	0.0224835
Dusp15	1.60719e-06	-0.609658	0.032	0.22	0.0228993
Grem1	1.62572e-06	-0.694075	0.011	0.168	0.0231632
Fahd1	1.66736e-06	-0.503349	0.116	0.372	0.0237565
Bad	1.68168e-06	-0.599876	0.589	0.768	0.0239606
Kcnip1	1.70608e-06	-0.611776	0.011	0.204	0.0243083
Rasgrf2	1.73401e-06	-0.678603	0.579	0.772	0.0247061
Mybpc1	1.73584e-06	-1.00897	0.021	0.192	0.0247322
Abcc8	1.82445e-06	-0.516817	0.232	0.504	0.0259948
Gprc5b	1.83769e-06	-0.80813	0.253	0.484	0.0261834
Cand2	1.83993e-06	-0.562498	0.011	0.172	0.0262154
LOC102553129	1.84058e-06	-0.604178	0.053	0.292	0.0262246
Rnf26	1.94046e-06	-0.566733	0.137	0.38	0.0276476
Sh3bgrl	1.97024e-06	-0.578379	0.516	0.76	0.028072
Sigmar1	1.98819e-06	-0.617696	0.642	0.76	0.0283277
Lta4h	2.0086e-06	-0.614361	0.168	0.44	0.0286185
Mrpl16	2.02003e-06	-0.526727	0.558	0.728	0.0287814
AABR07025662.1	2.04037e-06	-0.664748	0	0.132	0.0290712
Ptprg	2.05608e-06	1.20773	0.316	0.176	0.029295
Plpp4	2.06926e-06	1.10365	0.2	0.032	0.0294829
Mtmr12	2.11689e-06	1.07339	0.474	0.372	0.0301614
Nnmt	2.12304e-06	-0.762362	0.032	0.244	0.0302491
Lin7b	2.14379e-06	-0.543191	0.653	0.748	0.0305447
Timm29	2.17398e-06	-0.505354	0.589	0.764	0.0309749
Mir7a2	2.18202e-06	0.511818	0.168	0.028	0.0310895
Clip1	2.22425e-06	1.06317	0.874	0.804	0.0316911
Ints11	2.23334e-06	-0.652639	0.189	0.48	0.0318207
Sox6	2.25565e-06	-0.720991	0.021	0.2	0.0321386
Maoa	2.25658e-06	-0.728182	0.326	0.572	0.0321517
Myo1e	2.31147e-06	-0.620035	0.126	0.376	0.0329338
Adcyap1	2.31183e-06	1.1894	0.2	0.04	0.032939
Cars2	2.34426e-06	-0.545367	0.179	0.472	0.033401
AW209491	2.38295e-06	-0.650704	0.063	0.308	0.0339523
Snx12	2.43551e-06	-0.570064	0.179	0.468	0.0347012
Itgb1	2.46624e-06	-0.527469	0.305	0.58	0.035139
Pdcl3	2.47052e-06	-0.690092	0.4	0.624	0.0352
Sema5a	2.47388e-06	1.20213	0.305	0.144	0.0352478
Ccdc146	2.47946e-06	-0.832544	0.053	0.272	0.0353274
Nudt6	2.4953e-06	-0.557798	0.042	0.272	0.035553
Myo6	2.55602e-06	1.86759	0.2	0.08	0.0364182
Fam189a2	2.70156e-06	-0.59921	0.253	0.512	0.0384918
Rrs1	2.73364e-06	-0.503456	0.421	0.636	0.0389489
Hectd2	2.81825e-06	1.12989	0.695	0.552	0.0401544
LOC100363521	2.83533e-06	-0.520868	0.295	0.548	0.0403977
Fbxo7	2.85916e-06	-0.569667	0.368	0.612	0.0407373
Trank1	2.86483e-06	1.27056	0.537	0.376	0.0408182
Myh15	2.9762e-06	-0.683097	0	0.128	0.042405
Gpr149	2.9762e-06	-0.84329	0	0.128	0.042405
Cdh4	3.0821e-06	1.33008	0.263	0.124	0.0439138
Fzd3	3.08899e-06	1.02295	0.821	0.696	0.0440119
Rfc1	3.12101e-06	0.836667	0.853	0.708	0.0444682
Slc2a6	3.1742e-06	-0.529997	0.611	0.764	0.0452261
Ctbp2	3.21949e-06	1.15166	0.632	0.484	0.0458713
Slitrk2	3.2299e-06	0.835448	0.242	0.1	0.0460196
Vps35l	3.30768e-06	-0.529718	0.189	0.464	0.0471279
AABR07064299.1	3.30818e-06	-0.926955	0.011	0.16	0.047135
Pde1a	3.34551e-06	1.09712	0.316	0.104	0.0476668
Grm3	3.38127e-06	1.4203	0.232	0.1	0.0481763
AABR07013918.1	3.4454e-06	1.07906	0.411	0.228	0.0490901
Drd1	3.47271e-06	-0.618137	0.053	0.296	0.0494792
Hist3h2a	3.54526e-06	-0.514021	0.474	0.672	0.0505129
Pomt2	3.55692e-06	-0.539805	0.053	0.308	0.050679
Tmem176b	3.58685e-06	-0.940086	0.011	0.164	0.0511055
Mtg1	3.58958e-06	-0.513438	0.137	0.38	0.0511443
Htr1a	3.60435e-06	-0.797442	0.021	0.232	0.0513547
Lnc134	3.67484e-06	-0.531391	0.316	0.556	0.0523591
Sptbn2	3.69e-06	1.03078	0.958	0.904	0.0525751
Igfbp7	3.74571e-06	-0.673722	0.011	0.188	0.0533689
Micall1	3.75916e-06	-0.614729	0.074	0.328	0.0535605
5330417C22Rik	3.87785e-06	1.00346	0.347	0.192	0.0552517
Hsdl2	3.87993e-06	-0.569566	0.105	0.36	0.0552812
Rpain	4.01145e-06	-0.68447	0.126	0.352	0.0571551
Polr2j	4.15339e-06	-0.522024	0.6	0.772	0.0591775
Smarcal1	4.21444e-06	-0.75308	0.032	0.196	0.0600473
LOC691995	4.22697e-06	-0.823316	0.116	0.392	0.0602259
G6pc3	4.2414e-06	-0.520321	0.2	0.48	0.0604314
Pigk	4.28218e-06	-0.523413	0.547	0.744	0.0610126
Pcdhb5	4.33702e-06	-0.539996	0	0.124	0.0617939
Moxd1	4.33702e-06	-0.544647	0	0.124	0.0617939
Anks1a	4.33827e-06	-0.646642	0.063	0.296	0.0618117
Tnfrsf25	4.58924e-06	0.988203	0.168	0.028	0.0653875
Raver2	4.64835e-06	0.759945	0.116	0.012	0.0662297
Rcn1	4.82899e-06	-0.662752	0.116	0.38	0.0688034
Slc16a6	4.85679e-06	-0.692004	0.032	0.22	0.0691996
Smim18	4.9029e-06	-0.638597	0.526	0.692	0.0698566
Pigy	4.93474e-06	-0.514393	0.232	0.484	0.0703102
Washc3	4.96817e-06	-0.629275	0.263	0.504	0.0707865
Tyw5	5.01266e-06	-0.603113	0.011	0.172	0.0714204
Vav3	5.05536e-06	1.06338	0.232	0.064	0.0720288
Pcgf5	5.06397e-06	-0.598447	0.021	0.216	0.0721515
Pnn	5.10938e-06	0.937757	0.947	0.96	0.0727985
Nubpl	5.3023e-06	-0.566852	0.053	0.292	0.0755472
Aktip	5.37031e-06	-0.66661	0.621	0.76	0.0765161
Wdr41	5.42358e-06	-0.638129	0.316	0.576	0.0772751
Znrf2	5.51374e-06	-0.533735	0.242	0.524	0.0785598
Gpr137b	5.64024e-06	-0.671053	0.095	0.324	0.0803622
Ptcd1	5.80186e-06	-0.655948	0.105	0.348	0.0826649
Cdc42ep2	6.01327e-06	-0.651156	0.032	0.224	0.0856771
Map3k9	6.11103e-06	-0.617161	0.516	0.708	0.08707
Ciao1	6.16393e-06	-0.540379	0.589	0.756	0.0878236
Mrpl50	6.23458e-06	-0.521226	0.526	0.724	0.0888303
Bclaf1-000175	6.24467e-06	0.682003	0.968	0.892	0.0889741
Bhlhe41	6.3141e-06	-0.544647	0	0.12	0.0899633
Maneal	6.46587e-06	-0.658705	0.189	0.436	0.0921257
Cntnap5c	6.49412e-06	-0.698295	0.295	0.548	0.0925282
Herpud1	6.50631e-06	-0.937035	0.474	0.596	0.0927019
Mypop	6.55951e-06	-0.568575	0.137	0.384	0.0934599
Onecut2	6.5736e-06	1.27846	0.126	0.02	0.0936606
Tbc1d30	6.6135e-06	-0.724969	0.042	0.256	0.0942291
Rgma	6.7469e-06	0.505424	0.116	0.004	0.0961298
Nudt2	6.85811e-06	-0.520019	0.505	0.704	0.0977143
Calcrl	6.94475e-06	-0.590561	0.021	0.208	0.0989489
Cyb5r4	7.12493e-06	-0.513473	0.295	0.552	0.101516
Uprt	7.16301e-06	-0.512791	0.137	0.416	0.102059
Casp9	7.21911e-06	-0.621235	0.126	0.348	0.102858
Cpsf1	7.44538e-06	-0.59484	0.116	0.344	0.106082
Arid4a	7.62663e-06	0.977394	0.811	0.728	0.108664
Ndufaf3	7.63347e-06	-0.551878	0.537	0.724	0.108762
Gabra1	7.80403e-06	-0.587869	0.716	0.832	0.111192
Mrpl58	7.83661e-06	-0.501727	0.6	0.752	0.111656
Zfp618	7.89088e-06	-0.9409	0.021	0.192	0.112429
Lars2	7.98448e-06	-0.587686	0.032	0.22	0.113763
Ano4	8.13713e-06	-0.529332	0.6	0.748	0.115938
Prrt1	8.44921e-06	0.833445	0.432	0.304	0.120384
Ptpro	8.60491e-06	1.12888	0.621	0.504	0.122603
Syt10	8.63615e-06	0.773159	0.137	0.02	0.123048
Pnma8b	8.72244e-06	0.693474	0.989	0.996	0.124277
Hmbox1	8.90567e-06	-0.508896	0.253	0.5	0.126888
LOC100912483	8.92732e-06	-0.659311	0.126	0.352	0.127197
Tll1	9.00934e-06	-0.687026	0.611	0.7	0.128365
Fam241b	9.12291e-06	-0.544928	0.221	0.5	0.129983
Grid2	9.23916e-06	-0.530628	0.263	0.54	0.13164
Ppil3	9.32791e-06	-0.575279	0.032	0.252	0.132904
Mon1b	9.34624e-06	-0.655906	0.305	0.504	0.133165
Il16	9.36298e-06	0.748083	0.158	0.024	0.133404
Aven	9.94711e-06	-0.650588	0.021	0.212	0.141726
Yae1	1.00115e-05	-0.604931	0.189	0.424	0.142644
Elfn1	1.01631e-05	-0.517984	0.042	0.212	0.144804
Nkiras2	1.02304e-05	-0.551828	0.084	0.324	0.145763
Vav2	1.03544e-05	-0.602633	0.032	0.204	0.14753
Enkur	1.04896e-05	0.75477	0.179	0.024	0.149456
Ric8a	1.06495e-05	-0.550362	0.516	0.728	0.151734
Tmem199	1.07652e-05	-0.512011	0.484	0.676	0.153383
Ubtd2	1.07882e-05	-0.598051	0.053	0.26	0.153711
Gabra4	1.0932e-05	-0.574289	0.726	0.788	0.155759
Fhit	1.09403e-05	-0.882712	0.053	0.272	0.155878
Smarcd3	1.11518e-05	-0.552242	0.137	0.392	0.15889
Agbl4-Bend5	1.12331e-05	-0.821439	0.063	0.256	0.16005
AABR07037447.1	1.12413e-05	-0.628927	0.063	0.236	0.160166
Hecw1	1.18673e-05	1.438	0.326	0.188	0.169086
Fxn	1.19247e-05	-0.636964	0.653	0.76	0.169903
Nicn1	1.21779e-05	-0.609013	0.074	0.332	0.173511
Pip5k1b-Fam122a	1.24131e-05	0.701444	0.463	0.308	0.176862
Rasal1	1.25217e-05	1.06345	0.221	0.04	0.17841
Pex7	1.29574e-05	-0.52018	0.021	0.192	0.184618
Dok6	1.30905e-05	-0.631463	0.442	0.652	0.186514
Blnk	1.31654e-05	0.62013	0.158	0.016	0.18758
Phf10	1.48047e-05	-0.697943	0.337	0.58	0.210938
Kif18a	1.48878e-05	0.86493	0.158	0.032	0.212122
Slc39a13	1.5183e-05	-0.544288	0.074	0.336	0.216327
Arc	1.52928e-05	0.586468	0.179	0.048	0.217892
Frmpd4	1.55543e-05	-0.730998	0.4	0.604	0.221617
Zbtb8os	1.55958e-05	-0.659981	0.126	0.344	0.222209
Tesc	1.57196e-05	1.35705	0.242	0.112	0.223973
AABR07052085.3	1.57719e-05	-0.814786	0.032	0.192	0.224718
Lrrc55	1.63893e-05	1.10007	0.232	0.092	0.233514
Cdc26	1.69784e-05	-0.677301	0.211	0.432	0.241908
Cacna1c	1.72457e-05	1.12537	0.6	0.48	0.245717
Cpne6	1.73565e-05	1.10629	0.526	0.356	0.247296
Ttyh1	1.73707e-05	0.956249	0.8	0.688	0.247498
LOC102548695	1.76651e-05	-0.766267	0.158	0.388	0.251692
Slit3	1.77324e-05	1.1945	0.516	0.396	0.252651
Rap1gap2	1.80627e-05	0.976696	0.295	0.136	0.257358
Appl2	1.84341e-05	-0.56198	0.032	0.168	0.26265
Ankrd11	1.88586e-05	0.901849	1	0.984	0.268697
Fam173b	1.98175e-05	-0.591281	0.084	0.32	0.28236
Rev3l	1.98969e-05	1.0358	0.737	0.676	0.283491
Eef1akmt1	2.00569e-05	-0.513785	0.189	0.436	0.28577
Serinc4	2.04109e-05	-0.564145	0.021	0.188	0.290814
Fam217b	2.0508e-05	-0.590086	0.295	0.512	0.292198
Cnnm2	2.10361e-05	-0.680444	0.074	0.272	0.299722
Decr2	2.10498e-05	-0.580322	0.011	0.188	0.299918
Bloc1s3	2.11298e-05	-0.826904	0.042	0.252	0.301058
G0s2	2.12232e-05	-0.924021	0.021	0.164	0.302388
Herpud2	2.15388e-05	-0.554843	0.063	0.328	0.306885
Dcc	2.17696e-05	1.15713	0.516	0.36	0.310173
Casp4	2.20915e-05	-0.754527	0.021	0.188	0.314759
Hsdl1	2.23079e-05	-0.677048	0.358	0.616	0.317843
Ston2	2.24445e-05	0.794312	0.116	0.008	0.319789
Pard6a	2.29389e-05	-0.52171	0.347	0.576	0.326833
Sord	2.29449e-05	-0.666074	0.158	0.388	0.326919
Stxbp5l	2.30154e-05	0.804387	0.737	0.588	0.327924
Hrh3	2.34332e-05	-0.51834	0.032	0.2	0.333877
LOC100365289	2.34689e-05	-0.538102	0.074	0.312	0.334384
Rhov	2.38491e-05	-0.543956	0.179	0.428	0.339802
Wnt7a	2.41237e-05	-0.799948	0.179	0.388	0.343714
Macf1	2.45821e-05	0.817457	0.979	0.964	0.350246
Mfsd3	2.48874e-05	-0.502302	0.305	0.524	0.354596
Csrnp1	2.50452e-05	0.636361	0.137	0.012	0.356845
Coa7	2.53221e-05	-0.723079	0.042	0.232	0.360789
Tmem35a	2.55845e-05	0.811764	0.979	0.944	0.364528
Nlgn1	2.6023e-05	0.89066	0.653	0.492	0.370776
Pcyox1l	2.63508e-05	-0.500108	0.347	0.572	0.375445
Cpne4	2.68575e-05	0.981173	0.389	0.24	0.382665
Dusp5	2.72527e-05	0.876494	0.284	0.132	0.388296
Cbln2	2.74001e-05	-0.942714	0.011	0.14	0.390397
Taz	2.79902e-05	-0.58648	0.484	0.672	0.398805
Ints5	2.8291e-05	-0.548434	0.084	0.308	0.40309
Timp3	2.87144e-05	-0.662534	0.053	0.26	0.409123
Arxes2	2.87287e-05	1.01888	0.779	0.652	0.409327
Tnfrsf12a	2.87678e-05	-0.523381	0.074	0.316	0.409883
Rbm26	2.90044e-05	0.665426	0.937	0.876	0.413255
Pcdh20	2.91683e-05	0.882827	0.295	0.132	0.41559
AW549877	3.0569e-05	-0.620626	0.179	0.48	0.435546
LOC108352745	3.07957e-05	-0.55286	0.032	0.18	0.438778
Lcorl	3.12684e-05	1.26002	0.505	0.396	0.445512
Mapk11	3.16228e-05	1.16308	0.4	0.308	0.450562
Slc7a3	3.16238e-05	-0.55448	0.295	0.544	0.450576
Tmem8a	3.17078e-05	-0.530062	0.063	0.212	0.451772
Inhba	3.18425e-05	0.821944	0.116	0.016	0.453691
Dmac1	3.20302e-05	-0.508197	0.263	0.492	0.456366
Rps6ka6	3.2448e-05	-0.528354	0.116	0.372	0.462319
Adgrl1	3.25054e-05	0.57829	0.968	0.96	0.463137
AABR07030521.1	3.33253e-05	1.28395	0.358	0.252	0.474818
Nkain2	3.36468e-05	1.04137	0.526	0.372	0.4794
Tcea2	3.43425e-05	-0.525726	0.558	0.724	0.489312
Lsm5-173559	3.51442e-05	-0.507547	0.579	0.756	0.500735
C1ql3	3.59082e-05	1.08387	0.474	0.356	0.51162
Celf1	3.63084e-05	0.783743	0.905	0.824	0.517322
Tmlhe	3.63806e-05	-0.599863	0.042	0.212	0.518351
Sema4g	3.75316e-05	-0.514378	0.074	0.3	0.53475
Pianp	3.80258e-05	-0.601032	0.221	0.484	0.541792
Cacna1a	3.81334e-05	0.652048	0.989	0.936	0.543325
Sephs1	3.82203e-05	-0.606159	0.158	0.372	0.544562
Zfpm2	3.82244e-05	1.2789	0.221	0.072	0.544621
Tmem178a	3.84167e-05	-0.574318	0.442	0.604	0.54736
Cnst	3.9453e-05	-0.740349	0.063	0.244	0.562126
Ankrd55	4.1218e-05	-0.522028	0.084	0.332	0.587274
Eaf1	4.13462e-05	-0.761518	0.074	0.268	0.5891
Lonrf3	4.15561e-05	0.615786	0.116	0.012	0.592091
Tmem218	4.25764e-05	-0.509736	0.179	0.432	0.606629
Zc3h11a	4.26091e-05	1.07493	0.842	0.812	0.607095
Fam229b	4.3052e-05	-0.548015	0.105	0.324	0.613406
Tmeff2	4.30634e-05	0.853436	0.768	0.656	0.613567
Sh3rf1	4.42629e-05	0.958715	0.253	0.128	0.630658
Ttc21b	4.81542e-05	-0.634072	0.063	0.284	0.686102
Ahsa2	4.82483e-05	-0.514528	0.221	0.492	0.687442
Ankrd29	4.99697e-05	-0.5046	0.232	0.48	0.711968
Hmga1	5.04009e-05	-0.503459	0.442	0.668	0.718111
LOC680200	5.17903e-05	-0.503816	0.221	0.484	0.737908
Htr4	5.19802e-05	1.34675	0.158	0.04	0.740614
St6gal2	5.20685e-05	-0.572245	0.021	0.176	0.741871
Stx6	5.26125e-05	1.0949	0.337	0.232	0.749622
Ifi27	5.28357e-05	-0.636211	0.295	0.504	0.752803
Cdh2	5.68617e-05	0.874208	0.916	0.82	0.810165
Abca8a	5.72357e-05	1.0548	0.211	0.088	0.815494
Camk4	5.72891e-05	0.814182	0.474	0.336	0.816256
Nectin2	5.80424e-05	-0.559355	0.242	0.48	0.826989
Ccdc39	5.80853e-05	1.12977	0.484	0.388	0.827599
Pou3f4	5.81945e-05	-0.649759	0.032	0.216	0.829156
Gpd1	5.92029e-05	0.852371	0.189	0.06	0.843522
Cyp3a62	6.0691e-05	-0.589528	0.032	0.176	0.864726
Tut4	6.10845e-05	1.14105	0.642	0.572	0.870332
Smad1	6.20341e-05	-0.533936	0.095	0.32	0.883862
Fgd4	6.20546e-05	0.879517	0.811	0.7	0.884154
Sil1	6.32224e-05	-0.588915	0.074	0.268	0.900792
Ccdc51	6.56592e-05	-0.584225	0.074	0.26	0.935512
Dnajb5	6.59044e-05	0.782893	0.274	0.168	0.939006
Igsf11	6.59943e-05	-0.749124	0.032	0.22	0.940287
GL.14643	6.79888e-05	0.725782	0.147	0.044	0.968704
Orai2	6.9523e-05	1.02344	0.347	0.232	0.990564
Rassf8	6.95745e-05	-0.511303	0.063	0.272	0.991298
Cpd	6.98061e-05	0.847586	0.695	0.572	0.994597
4931406P16Rik	7.14602e-05	-0.509682	0.084	0.28	1
Tmem53	7.21266e-05	-0.521049	0.211	0.448	1
Ccar1	7.27704e-05	0.740685	0.8	0.752	1
Nov	7.41013e-05	1.11028	0.137	0.036	1
Srek1	7.57861e-05	0.902675	0.884	0.868	1
Polr3b	7.78268e-05	-0.640172	0.053	0.228	1
Mir30a	7.82941e-05	-0.667218	0.011	0.16	1
Pacsin3	7.88353e-05	0.805505	0.284	0.168	1
Npas1	7.93765e-05	-1.15767	0.011	0.112	1
Zfp189	7.954e-05	-0.563162	0.032	0.2	1
Ints10	8.01449e-05	0.721593	0.811	0.712	1
Csgalnact1	8.06658e-05	-0.622551	0.042	0.232	1
Lix1	8.40595e-05	0.985781	0.305	0.168	1
Crlf1	8.46266e-05	0.742538	0.116	0.024	1
Ryr2	8.55904e-05	1.13321	0.863	0.852	1
Dennd2a	8.92128e-05	0.774126	0.2	0.072	1
Plpbp	8.92316e-05	-0.504405	0.232	0.472	1
Zfp639	9.10607e-05	-0.553595	0.379	0.592	1
Prpf38b	9.18255e-05	1.02124	0.821	0.792	1
Cttnbp2nl	9.28548e-05	-0.556893	0.189	0.444	1
Bdp1	9.48113e-05	1.06121	0.716	0.62	1
Coro1a	9.49914e-05	0.928073	0.6	0.524	1
L3mbtl1	9.58884e-05	0.770737	0.179	0.06	1
Med11	9.76732e-05	-0.519129	0.074	0.276	1
Crebl2	9.7798e-05	-0.581445	0.147	0.38	1
Pdss1	9.92448e-05	-0.508693	0.168	0.384	1
Rasl11a	0.000101169	0.899042	0.179	0.08	1
Ptbp3	0.000102218	1.07611	0.316	0.192	1
Mlh3	0.000103037	-0.529695	0.084	0.296	1
B4galt3	0.000103112	-0.520049	0.316	0.52	1
Tsga10	0.00010369	0.943559	0.579	0.488	1
Tspan9	0.000105191	0.64913	0.147	0.032	1
Ogfrl1	0.000108881	1.0802	0.242	0.124	1
Tigd3	0.00010949	-0.517445	0.011	0.148	1
Amer1	0.000110402	-0.566989	0.053	0.22	1
Glyatl1	0.000112556	-0.628168	0.011	0.14	1
Hbegf	0.000113201	-0.675933	0.074	0.272	1
Itfg2	0.00011339	-0.514753	0.032	0.224	1
Pde1b	0.000115066	0.730972	0.168	0.068	1
Rnls	0.000115155	-0.662251	0.063	0.268	1
Kctd4	0.000117774	0.606571	0.116	0.012	1
Dmac2l	0.000120923	-0.537052	0.126	0.36	1
Prex1	0.000126825	0.756863	0.168	0.068	1
Ccsap	0.000130937	0.781823	0.347	0.204	1
Aco1	0.000131905	-0.558204	0.168	0.364	1
Rhpn1	0.000133066	0.581023	0.105	0.02	1
Cryl1	0.000134768	-0.569283	0.116	0.316	1
Thra	0.000141177	0.627194	0.926	0.832	1
Atp8a1	0.000148773	0.907987	0.789	0.676	1
Ncor1	0.000151197	0.8037	0.947	0.884	1
AABR07032520.1	0.0001518	-0.506734	0.126	0.32	1
Lrrc61	0.000156618	-0.52776	0.032	0.18	1
Zcchc9	0.000156763	0.677844	0.884	0.84	1
Mzf1	0.000158037	1.03085	0.232	0.124	1
Drc1	0.000159214	1.28624	0.232	0.164	1
Sez6l	0.000161505	0.731755	0.789	0.62	1
Slc24a2	0.000163785	0.687773	0.8	0.704	1
Thoc2	0.000165576	0.964603	0.863	0.78	1
Rpap3	0.000167523	0.754781	0.926	0.852	1
Disp3	0.000172638	0.824205	0.137	0.036	1
Mir132	0.000173274	0.9171	0.2	0.104	1
Tac1	0.000177668	-1.28841	0.063	0.212	1
Psd3.2	0.000184661	0.881963	0.463	0.376	1
Homer1	0.000185198	0.830286	0.821	0.74	1
Cdh6	0.000186793	-0.870695	0.042	0.216	1
Ier5	0.000186939	0.862224	0.158	0.056	1
Srgap1	0.000188759	0.786906	0.768	0.652	1
Ifngr1	0.000189402	-0.688135	0.063	0.212	1
LOC102553088	0.000190013	-0.542883	0.011	0.14	1
Baz2b	0.000194024	1.16541	0.684	0.612	1
Cdon	0.000196059	0.907601	0.126	0.032	1
Ubxn2a	0.000198121	0.56687	0.168	0.572	1
Pex5l	0.000199647	1.13627	0.284	0.172	1
Wnt7b	0.000199819	0.782228	0.263	0.112	1
Nktr	0.000199933	0.79734	0.874	0.888	1
Frmd6	0.000205726	0.507242	0.116	0.024	1
Cavin3	0.000208737	1.12688	0.147	0.044	1
Pigc	0.000209111	-0.535872	0.221	0.436	1
Wdr17	0.000211266	0.863744	0.211	0.108	1
Prdx4	0.000212323	-0.507166	0.074	0.26	1
Tspan2	0.00022067	-0.657658	0.042	0.196	1
Ebf4	0.000221993	-0.534912	0.179	0.4	1
1700001L19Rik	0.00022775	0.959239	0.221	0.08	1
Ccn1	0.000228132	0.903958	0.147	0.052	1
Slc35b1	0.00023128	0.87683	0.926	0.904	1
Tgds	0.00023385	-0.527191	0.095	0.292	1
Kcnip3	0.000236159	0.625363	0.179	0.052	1
Supt3h	0.000237028	-0.544462	0.074	0.252	1
AABR07043823.1	0.000238163	-0.558066	0.011	0.136	1
Tcerg1	0.000238747	0.940744	0.884	0.912	1
Pik3c3	0.000242123	-0.507967	0.179	0.412	1
Abcb4-172983	0.000242704	0.824309	0.253	0.16	1
Adgra3	0.000253007	-0.532783	0.042	0.196	1
Mest	0.000257189	0.9164	0.968	0.88	1
Pnma8a	0.000257517	0.753251	0.379	0.268	1
Rbm5	0.000260513	0.693926	0.937	0.928	1
Chd3	0.000264636	0.627492	0.916	0.9	1
Pdcd2l	0.000265972	-0.571984	0.116	0.336	1
Dazap1	0.000273884	-0.509529	0.337	0.548	1
AABR07035818.1	0.000276222	-0.593327	0.137	0.336	1
Dlk2	0.000283949	1.00661	0.358	0.268	1
Rbm25l1	0.000291965	0.900893	0.832	0.82	1
Safb2	0.000294668	0.882805	0.821	0.784	1
Eml5	0.000305919	0.900255	0.779	0.692	1
Srsf11	0.000306335	1.08978	0.916	0.94	1
Sdccag8	0.000311049	0.896437	0.411	0.312	1
Tmem63c	0.00031495	0.743151	0.232	0.128	1
Mtr	0.000318194	-0.581344	0.042	0.176	1
Cnnm3	0.000323868	-0.533676	0.105	0.328	1
Lpl	0.000328711	-0.962626	0.263	0.376	1
Nrg1	0.000328915	0.747671	0.168	0.08	1
Ptpn5	0.000332866	0.810032	0.821	0.72	1
Epha3	0.000341638	-0.534551	0.326	0.528	1
Cdr2l	0.000353856	-0.607368	0.147	0.368	1
Cbfb	0.000357309	-0.612644	0.063	0.232	1
Asic2	0.000362048	0.819775	0.2	0.08	1
Ptprr	0.000364826	0.891929	0.179	0.052	1
Nek6	0.000377267	0.861424	0.253	0.172	1
Rgs9	0.000378666	0.815433	0.158	0.06	1
Adam11	0.000387876	0.772981	0.579	0.504	1
Emx2	0.000391421	0.908356	0.137	0.044	1
Rtf1	0.000399038	0.660182	0.863	0.836	1
Il17d	0.000399183	-0.517984	0.042	0.164	1
Hspa1b	0.000405477	0.830207	0.2	0.052	1
Ak4	0.000412638	0.686417	0.168	0.08	1
Zfp954	0.000421316	-0.548573	0.042	0.208	1
Nedd4l	0.000428898	0.685931	0.558	0.448	1
Fxyd6	0.00043024	0.78867	0.358	0.2	1
Galnt7	0.000436639	-0.703412	0.063	0.228	1
4933427D14Rik	0.000442195	0.878555	0.516	0.4	1
Auts2	0.000444881	1.29501	0.358	0.3	1
Adgrg1	0.00045436	0.597066	0.358	0.256	1
Dars2	0.000457013	-0.530252	0.053	0.216	1
Sgsm1	0.000457077	0.841913	0.621	0.548	1
Cdkn3	0.000459734	-0.520493	0.042	0.188	1
Anks1b	0.000460023	0.753764	0.821	0.776	1
Actn1	0.000464132	1.0041	0.305	0.284	1
Tcerg1l	0.000466711	1.09179	0.253	0.152	1
Cabp1	0.000472134	0.62956	0.316	0.272	1
Tnfrsf19	0.000475046	0.922327	0.126	0.032	1
Shank3	0.000476652	0.582673	0.221	0.148	1
Zbtb16	0.000483588	1.06177	0.242	0.172	1
Akap13	0.000487141	0.864754	0.137	0.036	1
Cck	0.000489049	-2.29944	0.358	0.388	1
Rbms2	0.000501116	-0.522507	0.084	0.22	1
Tstd2	0.000501388	-0.54469	0.053	0.184	1
Ccdc88c	0.000519801	1.02745	0.2	0.116	1
Mustn1	0.000542658	1.6775	0.2	0.112	1
Mturn	0.000544956	-0.501707	0.074	0.24	1
Top1	0.0005675	0.721616	0.958	0.936	1
Bptf	0.000570264	0.763802	0.884	0.848	1
Gnai1	0.000570636	0.621364	0.768	0.624	1
Atp1a1	0.000576798	0.595864	0.547	0.56	1
Grik5	0.000586035	0.798292	0.821	0.756	1
Tox	0.000591862	0.928744	0.147	0.048	1
LOC681282	0.000608359	-0.574871	0.126	0.316	1
Inpp5k	0.000624695	-0.55824	0.189	0.404	1
Plxnb2	0.000633102	0.75952	0.168	0.096	1
U1-027194	0.000642491	0.915333	0.295	0.196	1
Pgap1	0.000645507	0.761355	0.821	0.716	1
Spire1	0.000664607	0.869688	0.453	0.356	1
Nasp	0.000679749	0.742269	0.842	0.752	1
Man1a1	0.000686321	0.807954	0.158	0.076	1
Zfp606	0.000692086	-0.565841	0.137	0.34	1
Letm2	0.000692619	-0.527662	0.284	0.5	1
Kif17	0.000695887	0.873221	0.232	0.144	1
Tbc1d1	0.000733639	0.962895	0.432	0.312	1
Lrrc10b	0.000766117	0.703105	0.105	0.028	1
Rasa1	0.000771224	0.86574	0.789	0.728	1
Ccdc88a	0.000784477	0.804723	0.968	0.976	1
Pdp1	0.000791738	-0.635821	0.116	0.272	1
Adsl	0.000793674	0.818267	0.589	0.504	1
Ccser1	0.000818838	1.09495	0.168	0.092	1
C2cd4c	0.000879584	0.79088	0.116	0.044	1
Tmod1	0.000919434	0.801599	0.179	0.056	1
Wapl	0.000936014	0.788395	0.747	0.62	1
Cdh9	0.000941306	1.37763	0.221	0.148	1
Trafd1	0.000970316	0.752714	0.632	0.532	1
Slc4a10	0.000994875	0.839691	0.863	0.86	1
Ogfod3	0.00101146	-0.569205	0.063	0.212	1
Polr1d	0.00101215	0.827276	0.863	0.748	1
Stx3	0.00101866	0.627675	0.358	0.216	1
Lrrn2	0.00102552	0.788051	0.568	0.452	1
7SK-206226	0.0010423	0.777906	0.189	0.104	1
Tmem131	0.00107004	0.646328	0.768	0.692	1
LOC102555911	0.00107163	0.644608	0.242	0.144	1
Ubn1	0.00107448	0.72319	0.653	0.56	1
Nol4	0.00109595	0.800275	0.611	0.56	1
Fyttd1	0.00109852	0.686468	0.968	0.912	1
Pibf1	0.0011361	-0.510426	0.168	0.364	1
Kmt2a	0.00115502	0.802669	0.884	0.864	1
AABR07031768.1	0.00120314	0.616529	0.684	0.544	1
Sowaha	0.00121207	0.822928	0.116	0.052	1
Nrgn	0.0012185	0.745285	0.147	0.084	1
AABR07008724.2	0.0012215	0.548467	0.137	0.056	1
Synpo	0.00132311	0.52011	0.2	0.1	1
Sfrp1	0.00133767	-0.575279	0.032	0.152	1
Chd2	0.00133868	0.80347	0.853	0.788	1
Fam172a	0.00133951	-0.591579	0.168	0.344	1
Rbfox3	0.00134562	0.742908	0.716	0.672	1
Plekhg1	0.00134719	0.847824	0.179	0.112	1
Fastkd3	0.00134946	-0.516902	0.074	0.216	1
Col4a2	0.0013599	0.926762	0.274	0.228	1
Nsun7	0.00137618	0.837348	0.147	0.068	1
Ppp1r9a	0.00141434	1.08909	0.621	0.564	1
Dennd4a	0.00143539	-0.695438	0.147	0.364	1
Hpca	0.00144954	0.875747	0.421	0.36	1
Pam	0.00146586	0.525133	1	0.98	1
Tnfaip8	0.0014955	0.944856	0.147	0.1	1
Kcng2	0.00151063	0.848039	0.158	0.068	1
Cdh7	0.00154345	0.611694	0.158	0.064	1
2020-09-03	0.00155198	0.688013	0.947	0.92	1
Inka2	0.0015534	0.876907	0.147	0.056	1
Arglu1	0.00156623	0.50135	0.947	0.864	1
Ptpre	0.00157588	0.681754	0.8	0.632	1
Usp34	0.00161719	0.774322	0.979	0.976	1
Sfxn2	0.00163519	1.06099	0.316	0.228	1
Kcnmb4	0.00164533	0.578292	0.116	0.048	1
Golgb1	0.0016553	0.834337	0.926	0.9	1
Nipbl	0.00166196	0.971062	0.716	0.64	1
Dynll1	0.00166618	0.564147	1	0.956	1
Mllt10	0.00168517	0.897111	0.611	0.528	1
Edrf1	0.00171444	0.628938	0.568	0.464	1
Ash1l	0.00173454	0.68186	0.926	0.868	1
Crim1	0.00176339	0.996512	0.232	0.16	1
Bcl9	0.00176749	0.859175	0.274	0.184	1
Megf11	0.00177206	0.598449	0.263	0.14	1
Slain1	0.00181811	0.640056	0.284	0.192	1
Gin1	0.00184171	-0.586165	0.168	0.38	1
Ppp1r1a	0.00184983	0.873315	0.695	0.596	1
Vom2r59	0.00186018	0.889397	0.126	0.044	1
Efnb3	0.00190407	0.654467	0.632	0.528	1
Herc1	0.00195658	0.531487	0.968	0.948	1
S100a10	0.001979	0.811321	0.4	0.28	1
Mettl17	0.00199506	-0.502988	0.063	0.232	1
Tafa2	0.00201652	0.62695	0.726	0.564	1
Dnah9	0.00207229	0.910357	0.263	0.164	1
Msn	0.00207331	0.539685	0.116	0.028	1
Cntn4	0.00212124	0.862772	0.484	0.392	1
U2-094248	0.00216628	0.768455	0.221	0.16	1
Ajap1	0.00224009	-0.538549	0.221	0.376	1
Nr3c1	0.00227476	0.885954	0.368	0.284	1
LOC690035	0.00228555	1.03054	0.368	0.328	1
AABR07003933.1	0.00231817	0.562119	0.295	0.192	1
Cdh12	0.00235627	1.01608	0.516	0.448	1
Kpna4	0.00237314	0.850202	0.316	0.26	1
Fnbp4	0.00238039	1.05447	0.779	0.8	1
Trmu	0.00238944	-0.635505	0.074	0.256	1
Nrp1	0.00242081	0.757863	0.168	0.08	1
Gas7	0.00243181	0.637183	0.895	0.78	1
Rasl11b	0.00249354	0.825096	0.432	0.312	1
Mmd2	0.00250283	0.558888	0.147	0.056	1
Rapgef4	0.00252173	0.906865	0.347	0.28	1
Zbtb26	0.00255613	-0.641854	0.105	0.24	1
Dimt1-119473	0.00265792	0.627547	0.105	0.032	1
Ccdc138	0.00270173	0.947931	0.316	0.256	1
Trpm3	0.00272504	0.943021	0.253	0.168	1
Nebl	0.00275403	0.629798	0.389	0.32	1
Rasgrp1	0.00276066	0.770416	0.179	0.1	1
LOC689986-060204	0.00280666	0.901688	0.463	0.452	1
Abhd17c	0.00284191	-0.501516	0.095	0.244	1
Inhbb	0.00290774	0.732546	0.126	0.064	1
Kif1b	0.00291795	0.518492	1	0.98	1
Spty2d1	0.00292018	0.800897	0.253	0.176	1
Usp2	0.00298014	0.63158	0.568	0.492	1
Cplane1	0.00299063	1.06986	0.295	0.256	1
Ehbp1l1	0.00302272	0.864284	0.232	0.124	1
Akap9	0.00305748	0.751002	0.989	0.98	1
Zfand6-U6	0.00307183	-0.704799	0.063	0.224	1
Ogfod2	0.0031274	-0.574003	0.084	0.232	1
Mgat4c	0.00313545	1.13595	0.263	0.212	1
Slc8a1	0.00315088	0.830199	0.832	0.776	1
Tpd52l1	0.00317575	0.67212	0.105	0.028	1
Lrfn5	0.00322947	0.797239	0.421	0.36	1
Mink1	0.00329554	0.774877	0.463	0.408	1
Kmt2c	0.00330852	0.898093	0.747	0.68	1
LOC102551114	0.00337481	0.64893	0.832	0.656	1
Wdr90	0.00345233	0.694291	0.147	0.088	1
Trpc6	0.00351232	1.0385	0.137	0.068	1
Nexmif	0.00354893	0.596535	0.811	0.68	1
LOC102555663	0.00358661	-0.578636	0.063	0.156	1
Kitlg	0.00360364	0.765738	0.326	0.24	1
Mfsd4a	0.00372197	1.07294	0.411	0.38	1
Bms1	0.00376135	0.876202	0.568	0.516	1
Dst	0.00378906	0.719148	0.979	0.996	1
Susd6	0.0038412	0.805568	0.611	0.588	1
Ttc26	0.00389069	0.800784	0.568	0.54	1
Brf1	0.00407926	1.12973	0.316	0.284	1
Mina	0.00412235	0.582685	0.232	0.132	1
Ctxn2	0.00422324	-0.601317	0.053	0.172	1
Kif13a	0.00428172	0.723424	0.326	0.272	1
Dync2h1	0.00436146	0.586684	0.495	0.42	1
Ptp4a2	0.00436609	0.696056	0.979	0.932	1
Csnk1g1	0.00448539	0.91494	0.505	0.472	1
Nop56	0.0045845	0.510971	0.737	0.632	1
AABR07061453.1	0.00464518	0.993844	0.495	0.448	1
AABR07012475.2	0.00468074	-0.50976	0.074	0.228	1
Ust	0.00484105	-0.633339	0.453	0.54	1
Pabpn1	0.00495453	0.906788	0.937	0.968	1
Mga	0.00502565	0.636194	0.811	0.768	1
Arhgap42	0.00502831	0.777777	0.116	0.072	1
Gpatch8	0.00507317	0.785262	0.842	0.848	1
Celf3	0.00508579	0.599307	0.642	0.624	1
tGap1	0.00509172	0.507531	0.158	0.096	1
Dmxl1	0.00512103	1.18032	0.842	0.824	1
Acin1	0.0053046	0.637506	0.895	0.904	1
Shf	0.0053094	0.701729	0.116	0.044	1
Spice1	0.00532952	0.560393	0.105	0.028	1
AABR07068161.1	0.00540484	0.81818	0.411	0.34	1
Trhde	0.00542695	0.614714	0.295	0.24	1
Srrm3	0.00570744	1.12733	0.411	0.448	1
Abracl	0.00592417	-0.663462	0.316	0.476	1
Galnt14	0.00599647	0.606845	0.263	0.16	1
Prrt2	0.00602586	0.68917	0.211	0.14	1
Als2	0.00603952	-0.519354	0.137	0.304	1
Hs6st3	0.00614447	-0.587632	0.095	0.212	1
Zc3h13	0.00622146	0.823359	0.853	0.844	1
Fam133b	0.00639261	0.523769	0.737	0.676	1
Dlgap4	0.00646625	0.695957	0.8	0.768	1
Dgka	0.00648679	0.658263	0.158	0.112	1
Nop58	0.00666281	0.718117	0.937	0.9	1
Ylpm1	0.00696246	0.713312	0.853	0.824	1
Tspoap1	0.00705518	0.708232	0.347	0.32	1
Mcm4	0.00716461	0.599652	0.295	0.228	1
Rnf182	0.00728136	0.797084	0.147	0.064	1
LOC365985	0.00732838	0.712039	0.4	0.36	1
Pop5	0.0075033	0.702741	0.179	0.12	1
St6galnac5	0.00752317	0.532882	0.126	0.064	1
Grik2	0.00757223	0.67099	0.621	0.58	1
Kat6b	0.00762542	0.80147	0.516	0.532	1
Epha7	0.00777333	1.01876	0.663	0.732	1
Eef1a1	0.00779171	0.581632	0.705	0.6	1
Rexo1	0.00800419	0.696583	0.758	0.728	1
Ndst4	0.0080728	0.509962	0.116	0.036	1
Sox4	0.00832534	0.711059	0.558	0.516	1
Pak6	0.00848201	0.961392	0.463	0.4	1
Bcl11a	0.00850438	0.583172	0.316	0.252	1
Btg3	0.0085414	0.839258	0.432	0.364	1
Ddn	0.00856739	0.64552	0.642	0.6	1
Ddx10	0.00867085	0.73312	0.705	0.652	1
Myt1	0.00870919	1.05751	0.2	0.164	1
Mlip	0.0087852	0.596237	0.253	0.176	1
Meis2	0.00888481	0.848192	0.105	0.064	1
Sun1	0.00896023	0.718524	0.695	0.656	1
Rp9	0.00907622	0.934333	0.463	0.412	1
Fry	0.00912945	0.711154	0.179	0.132	1
Gmeb2	0.00915311	0.779679	0.2	0.152	1
Focad	0.00934666	0.850371	0.537	0.54	1
Nptxr	0.00935496	0.69565	0.621	0.628	1
Enox1	0.00951901	0.809515	0.274	0.216	1
Prmt8	0.00959803	0.600388	0.705	0.672	1
Zfp623	0.00965632	0.73162	0.211	0.136	1
Scaper	0.00973121	0.650991	0.674	0.644	1
Tc2n	0.00976446	0.720989	0.137	0.068	1
Pcsk4-2310011J03Rik	0.00985554	0.875594	0.2	0.16	1
Dennd3	0.00991366	0.60307	0.126	0.084	1
U2surp	0.0100761	0.543751	0.937	0.948	1
Cacna1d	0.0100956	1.14375	0.632	0.66	1
Cep290	0.0101888	0.849474	0.747	0.728	1
Ppfia3	0.0101916	0.849952	0.568	0.624	1
Syt17	0.0102377	0.552572	0.211	0.136	1
LOC102547703	0.0104254	0.813127	0.589	0.576	1
Exosc1	0.0106753	0.679902	0.505	0.424	1
Ngef	0.010761	0.834863	0.779	0.74	1
Tial1	0.010811	0.792773	0.726	0.74	1
Spry2	0.010911	0.611951	0.611	0.556	1
Wdr92	0.0109532	0.762044	0.168	0.124	1
Slc16a2	0.0110972	0.69776	0.253	0.216	1
Gpd2	0.0115017	0.70485	0.558	0.504	1
Itsn1	0.0119	0.683177	0.695	0.616	1
Arhgap15	0.0119463	-0.580352	0.063	0.14	1
Zfp652	0.0122262	0.689819	0.105	0.072	1
Cep162	0.0123579	0.904885	0.2	0.144	1
Spata2L	0.0125078	0.768417	0.526	0.46	1
Angel1	0.0125425	0.713519	0.137	0.084	1
Cst6	0.0127157	-0.585407	0.105	0.252	1
Exoc6	0.0130243	0.668383	0.274	0.236	1
Rasa2	0.0131032	0.744884	0.642	0.588	1
Ddx41	0.0131326	1.09734	0.326	0.34	1
Ldb2	0.0131655	-0.57919	0.032	0.124	1
Jph4	0.0132926	0.656166	0.558	0.52	1
Mal2	0.013341	0.514736	0.242	0.148	1
Bbx	0.0138759	0.918467	0.211	0.22	1
Gpr135	0.0140841	0.68098	0.126	0.068	1
Plk2	0.0142507	0.522688	0.726	0.596	1
Pigb	0.0142664	-0.503268	0.042	0.14	1
Rbm6	0.0142724	0.501314	0.853	0.808	1
Pcdh15	0.0144459	0.778504	0.305	0.256	1
Cep89	0.0144576	1.05761	0.242	0.2	1
Gmeb1	0.0144833	0.698439	0.484	0.46	1
Rhob	0.0145186	0.641734	0.6	0.604	1
Rnf19a	0.0145861	0.778015	0.295	0.28	1
Klhl2	0.0145878	0.656735	0.779	0.692	1
Taf5	0.0146456	0.991754	0.105	0.08	1
Ubr2	0.0149886	0.690038	0.779	0.8	1
Vps50	0.015112	-0.542924	0.084	0.204	1
Col11a1	0.0153038	0.618845	0.263	0.188	1
Ssx2ip	0.0153386	0.667209	0.495	0.452	1
Alkal2	0.0153538	-0.554995	0.189	0.312	1
Tanc2	0.0153563	0.820586	0.547	0.512	1
Cep95	0.0157613	0.775391	0.463	0.4	1
Mysm1	0.0157751	0.755451	0.811	0.764	1
Mef2a	0.0159185	0.564882	0.958	0.968	1
Lrrcc1	0.016073	0.743244	0.389	0.344	1
G2e3	0.0164471	0.671702	0.274	0.248	1
AABR07048600.1	0.0164896	0.59916	0.116	0.06	1
Sugp1	0.0166167	0.711651	0.674	0.68	1
Hdac7	0.0168286	0.558989	0.253	0.184	1
SNORA70-102791	0.016859	0.778541	0.189	0.14	1
8030462N17Rik	0.0171964	-0.534897	0.242	0.404	1
Tacc2	0.0172001	0.665677	0.737	0.732	1
Srrm4	0.0175579	1.03087	0.305	0.3	1
Igdcc3	0.0183253	0.508718	0.158	0.076	1
Kdm3a	0.0184452	1.06357	0.389	0.384	1
Tnks2	0.0189797	0.554397	0.263	0.276	1
Sipa1l1	0.0193553	0.759667	0.484	0.436	1
Add2-Tprkb	0.0200426	0.739457	0.789	0.76	1
Actr3b	0.020396	0.503669	0.684	0.688	1
Rapgef2	0.0204095	0.849041	0.705	0.676	1
Dkc1	0.0207164	0.532032	0.884	0.848	1
Chrna4	0.0211085	-0.608491	0.063	0.144	1
Aff3	0.0211111	1.03124	0.168	0.132	1
AABR07021736.1	0.0211553	0.620787	0.063	0.228	1
Gabra3	0.0212087	0.621633	0.126	0.08	1
Spop	0.0214535	0.7169	0.726	0.68	1
Vcan	0.0218188	-0.530852	0.2	0.328	1
Bcl11b	0.0221151	0.644132	0.558	0.464	1
Smap2	0.0223184	0.720256	0.779	0.74	1
Pcdhga1-Pcdhga1-Pcdhga10-Pcdhga11-Pcdhga12-Pcdhga2-Pcdhga3-Pcdhga5-Pcdhga7-Pcdhga8-Pcdhga9-Pcdhgb7-Pcdhgb8-Pcdhgc3	0.0225354	0.571108	0.221	0.18	1
Kti12-Txndc12	0.0231395	0.714526	0.6	0.548	1
Lin7c	0.023304	0.841021	0.463	0.444	1
Ccdc34	0.0234922	0.751846	0.284	0.272	1
Spag5-026122	0.0237237	0.50985	0.147	0.096	1
Sorbs1	0.0238827	0.603352	0.895	0.876	1
Ank2.2	0.0241313	0.651774	0.379	0.368	1
Nectin3	0.0242274	0.516001	0.137	0.088	1
AABR07042733.1	0.0244157	0.815733	0.168	0.148	1
Ext1	0.0249864	0.761248	0.211	0.192	1
Nrxn1	0.0254872	0.577349	1	0.992	1
Htr2c	0.0255609	0.661854	0.211	0.14	1
Sin3a	0.0259485	0.654841	0.326	0.28	1
Creg2	0.0259602	0.635759	0.432	0.412	1
Mpped2	0.0263698	0.796588	0.168	0.144	1
Zfp365	0.0264042	0.635043	0.632	0.584	1
Kdm5b	0.0267436	0.616942	0.621	0.576	1
Slc25a42	0.0272726	0.658674	0.158	0.14	1
Ubr1	0.0274459	0.638302	0.821	0.768	1
N4bp2	0.0275128	0.920484	0.316	0.304	1
Per1	0.0275955	0.564344	0.221	0.196	1
Aox2	0.0282839	0.610032	0.179	0.128	1
Luc7l	0.0285058	0.660313	0.895	0.9	1
U6-094367	0.0285745	0.598794	0.274	0.24	1
Syne1	0.0285925	1.09099	0.379	0.408	1
Cep112	0.0287002	0.650809	0.116	0.068	1
Maml3	0.0287473	0.58135	0.189	0.168	1
Atxn7l2	0.0289434	0.722934	0.242	0.192	1
Lin7a	0.0289816	0.514228	0.158	0.124	1
Fam3a	0.0291929	0.573522	0.211	0.16	1
Fstl1	0.0294348	0.765587	0.179	0.136	1
Gabrb3	0.0302682	0.501145	0.958	0.972	1
Pkp4	0.0303997	0.608904	0.916	0.884	1
Kcnc3	0.0305005	0.609133	0.126	0.124	1
Foxj3	0.0306151	0.582852	0.632	0.612	1
Dgki	0.0306993	0.786171	0.4	0.4	1
Ensa	0.0308561	0.587933	0.989	0.976	1
Trib1	0.0308841	0.872274	0.242	0.244	1
Arhgef12	0.0312105	0.685753	0.537	0.516	1
Wscd2	0.0312119	0.500492	0.147	0.1	1
Eif2d	0.0312746	0.784874	0.242	0.248	1
Vps52	0.0314581	0.60232	0.568	0.584	1
Lcor	0.0315483	0.786117	0.653	0.596	1
Prkaa1	0.0318818	0.517253	0.126	0.344	1
Tnks1bp1	0.0326159	0.680758	0.158	0.144	1
Cep295	0.0331252	0.642311	0.263	0.22	1
Bsn	0.0336149	1.02854	0.116	0.1	1
Xpo1	0.0336954	0.580841	0.579	0.552	1
Fra10ac1	0.0338236	0.725683	0.516	0.516	1
Dock9	0.033888	0.689441	0.316	0.296	1
Fxr1	0.0340155	0.608263	0.526	0.516	1
Smarce1	0.0340918	0.523605	0.863	0.824	1
Mtmr10	0.0345897	0.537884	0.126	0.096	1
Eif4ebp3	0.0351448	0.608757	0.895	0.916	1
Dennd11	0.0351741	0.515599	0.158	0.104	1
Rsf1	0.0352942	0.739773	0.758	0.744	1
Rnf128	0.0355178	0.976168	0.263	0.276	1
Cul5	0.0355961	0.631938	0.821	0.804	1
C2cd2l	0.035637	0.711359	0.811	0.752	1
Mark2	0.0359343	0.565278	0.316	0.256	1
Mier1	0.0359504	0.622518	0.726	0.764	1
Scd	0.0360463	0.602285	0.168	0.136	1
Btbd19	0.0360553	1.12254	0.232	0.24	1
Agap2	0.0362553	0.77505	0.474	0.552	1
Tmem131l	0.0362693	0.661649	0.263	0.24	1
Cry2	0.0365322	0.650464	0.684	0.656	1
[truncated: 581 more rows]

## Sheet: Dendrites_Glut._vs_GABA
Gene_Name	p-value	Avg_logFC	pct.Glutamatergic	pct.GABAergic	adj_p-value
Map9	0.000209391	1.94591	0.273	0	0.619378
Arpp21	0.000402958	2.46993	0.364	0.036	1
Nnat	0.000424616	2.48017	0.727	0.429	1
Arpc5	0.000630235	2.36813	0.455	0.071	1
Ndufa5	0.000649481	-1.98571	0.455	0.738	1
Adarb1	0.000782898	2.27408	0.455	0.119	1
Agap2	0.00111882	0.954718	0.364	0.071	1
Schip1	0.0014414	2.42573	0.364	0.048	1
Mapre3	0.0015001	0.785889	0.273	0.024	1
Cox5b	0.00150169	-1.63219	0.909	0.917	1
Lmo2	0.00171237	1.5221	0.273	0.024	1
AABR07024907.1	0.00208792	2.254	0.273	0.06	1
AC141489.1	0.00266669	-1.32102	0.182	0.56	1
Ndufb3	0.0027008	-0.831873	0	0.357	1
Rpl27a-002131	0.00403063	-0.699082	0	0.333	1
Rps24	0.00461647	-1.34493	0.182	0.5	1
Lbh	0.00490487	-0.79493	0	0.321	1
St3gal5	0.00493149	1.11663	0.273	0.048	1
Ndufs5	0.00595431	-0.816207	0	0.31	1
Cct6a	0.00602182	1.48819	0.273	0.071	1
Gad2	0.00602836	-1.80438	0.364	0.595	1
Atp5mf-Zfp394	0.00683082	-1.51555	0.545	0.762	1
Atp5pd	0.00721639	-1.43145	0.545	0.726	1
Cpeb4	0.00743454	1.26745	0.182	0.012	1
Lgi2	0.00754993	-1.9692	0.273	0.536	1
Chtop	0.00780169	1.58785	0.273	0.06	1
Hpcal4	0.00809872	2.12494	0.364	0.083	1
Atp5f1e	0.0083619	-0.983717	0.636	0.929	1
Eef1g	0.00871562	-0.911517	0	0.286	1
Chchd1	0.00871562	-1.10652	0	0.286	1
Pabpc1	0.00871562	-1.46908	0	0.286	1
Rps17	0.00871562	-0.503657	0	0.286	1
Slc17a7	0.0090751	0.543443	0.364	0.036	1
Arglu1	0.00926325	0.745067	0.182	0.036	1
Alcam	0.00957179	2.13599	0.273	0.048	1
Bhlhe22	0.00992117	0.869771	0.273	0.048	1
Rps7	0.0105116	-0.847298	0	0.274	1
Sst	0.0105116	-0.930475	0	0.274	1
Diras1	0.0105116	-1.14891	0	0.274	1
Uqcrq	0.0111742	-0.900375	0.727	0.905	1
Thy1	0.0126531	-1.12986	0	0.262	1
Sdhc	0.0126531	-1.21463	0	0.262	1
Hdhd2	0.0126531	-1.57307	0	0.262	1
Nptxr	0.0127631	1.06913	0.273	0.048	1
Sub1	0.0142315	-1.05812	0.182	0.452	1
Lactb2-Tram1	0.0147752	1.35047	0.182	0.048	1
Cnksr2	0.0148534	2.70502	0.182	0.06	1
Gpr88	0.0152035	-1.06635	0	0.25	1
Tpm1	0.0152035	-0.958255	0	0.25	1
Arf6	0.0161319	1.13298	0.182	0.036	1
Uso1	0.0163417	1.82766	0.182	0.048	1
AABR07024500.1	0.016587	0.811249	0.273	0.048	1
Nap1l5	0.0167358	-1.51045	0.091	0.345	1
Snca	0.0180329	2.18707	0.364	0.083	1
Vdac3	0.0182374	-0.789539	0	0.238	1
Serf1	0.0182374	-0.81093	0	0.238	1
Selenok	0.0182374	-1.02877	0	0.238	1
Enah	0.0182374	-1.09861	0	0.238	1
Fbxo10.2	0.0182374	-1.35914	0	0.238	1
Fabp3	0.0182374	-1.31219	0	0.238	1
Idh3B	0.0182374	-1.14891	0	0.238	1
Arhgef7	0.0184439	1.03578	0.273	0.095	1
Ndufb5	0.0185562	-1.53485	0.455	0.548	1
Cstb	0.0187408	-1.29331	0.091	0.345	1
Plat	0.0200505	0.822518	0.273	0.083	1
Cdk5r2	0.0205605	1.8704	0.273	0.131	1
Tmsb15b2	0.0206588	-1.66171	0.182	0.405	1
Atp5f1d	0.0207346	-1.5061	0.636	0.762	1
Rab9b	0.0211817	1.2273	0.182	0.036	1
Fat3	0.0211996	0.791208	0.182	0.036	1
LOC102552369	0.0214328	-1.6463	0.182	0.393	1
Lhx6-Ndufa8	0.0215596	-1.47727	0.455	0.607	1
LOC288913	0.0218428	-0.800292	0	0.226	1
Mgll	0.0218428	-0.852387	0	0.226	1
Mpc1	0.0218428	-0.962811	0	0.226	1
Rpl26	0.0218428	-0.510826	0	0.226	1
LOC108348287	0.0218428	-0.545917	0	0.226	1
Rps27	0.02193	1.04021	0.909	0.524	1
Mef2c	0.0228558	-1.09894	0.091	0.345	1
Sfr1	0.0238817	1.59847	0.182	0.048	1
Slco1a2-174417	0.0239248	0.685848	0.273	0.095	1
Rpl37a-ps1	0.0240458	-1.20324	0.818	0.833	1
Mrpl54	0.0241343	-1.58697	0.091	0.333	1
Gfap	0.0242589	0.854267	0.182	0.024	1
Casc4	0.0246264	0.700116	0.182	0.048	1
Atp5f1a	0.0255476	-1.32572	0.091	0.321	1
Ndufa12	0.0261242	-0.693147	0	0.214	1
Mrpl17	0.0261242	-1.07044	0	0.214	1
Edf1	0.0261242	-0.935159	0	0.214	1
Cox6a2	0.0261242	-1.03302	0	0.214	1
Hypk	0.0261242	-1.26628	0	0.214	1
Slc6a1	0.0261242	-1.34373	0	0.214	1
Clec2l	0.0261242	-1.42139	0	0.214	1
Uhmk1	0.0261242	-1.18958	0	0.214	1
Phactr1	0.0261242	-1.49344	0	0.214	1
Nrip3	0.0261242	-1.70691	0	0.214	1
Ndufb4	0.0261242	-0.593064	0	0.214	1
Rnf139-Ndufb9	0.0274191	-1.43838	0.818	0.821	1
Rab6a	0.0275395	2.15932	0.545	0.44	1
Atp5me	0.0277361	-0.762968	0.818	0.929	1
Btf3	0.0284919	0.657556	0.182	0.048	1
Pam	0.0288871	2.37095	0.273	0.155	1
Miat	0.0290398	1.83118	0.182	0.048	1
Pcyox1	0.0292385	2.86405	0.182	0.036	1
Timm8b	0.0300432	-1.46359	0.545	0.726	1
Prkdc	0.0301416	1.19588	0.182	0.036	1
Supt16h	0.0302529	1.60911	0.182	0.036	1
Syt1	0.0303871	-1.29653	0.182	0.381	1
Acsl4	0.0304893	2.1163	0.182	0.071	1
Vamp7	0.0306192	1.11152	0.182	0.048	1
Trappc2l	0.0307249	-1.21227	0.091	0.31	1
Rpl41	0.0310013	-0.989839	1	0.929	1
Sort1	0.0312055	-0.710847	0	0.202	1
Xkr4	0.0312055	-0.877451	0	0.202	1
Pnoc	0.0312055	-0.906721	0	0.202	1
Rps3a	0.0312055	-0.901902	0	0.202	1
Araf	0.0312055	-0.949081	0	0.202	1
Ttll7	0.0312055	-1.17499	0	0.202	1
Nsa2	0.0312055	-0.998529	0	0.202	1
Rbsn-Mrps25	0.0312055	-0.998529	0	0.202	1
Nsg2	0.0313045	2.08927	0.273	0.19	1
Hcfc1r1	0.0314626	-1.45343	0.545	0.583	1
Hlf	0.03226	0.635816	0.182	0.024	1
Nsd1	0.0323406	1.36848	0.182	0.048	1
Actb	0.0323478	1.00584	0.909	0.583	1
Cartpt	0.033538	-1.70276	0.091	0.298	1
Kif5b	0.0338922	-1.48359	0.091	0.321	1
Mir129-2	0.0346208	0.942277	0.273	0.083	1
AABR07054189.1	0.0346417	0.549253	0.273	0.071	1
Atp5f1b	0.0348582	-0.595235	0.909	0.952	1
Cltc	0.0349686	-1.6349	0.091	0.31	1
Hsbp1	0.035277	-1.43727	0.273	0.417	1
LOC100911769	0.035669	-1.28126	0.091	0.31	1
Cort	0.0360292	-1.40643	0.091	0.298	1
Rpl3	0.0365679	2.94836	0.364	0.345	1
Scd2	0.0372071	1.04333	0.364	0.107	1
Zfp771	0.037234	-0.831873	0	0.19	1
Pam16	0.037234	-0.800292	0	0.19	1
Uqcc2-148830	0.037234	-0.800292	0	0.19	1
Mea1	0.037234	-0.994133	0	0.19	1
Nrxn3	0.037234	-1.02877	0	0.19	1
Pnpla8	0.037234	-1.25276	0	0.19	1
Cerk	0.037234	-1.07044	0	0.19	1
Tmem183a	0.037234	-1.30252	0	0.19	1
Kcnq3	0.0372341	-0.699082	0	0.19	1
Bap1	0.0372341	-0.57313	0	0.19	1
Fkbp2	0.0372341	-0.619039	0	0.19	1
Top1	0.0375531	1.40431	0.182	0.06	1
Hdac3	0.0381809	1.18562	0.182	0.024	1
Hsph1	0.0382232	1.04872	0.182	0.048	1
Cystm1	0.04148	-1.44832	0.091	0.286	1
Synj1	0.0425095	0.866868	0.273	0.083	1
Rpl19-AC135443.1	0.0439704	-1.26556	0.273	0.405	1
Taldo1	0.0443858	-0.756569	0	0.179	1
Chd5	0.0443858	-0.750967	0	0.179	1
Gdi1	0.0443858	-0.745333	0	0.179	1
Ctsd	0.0443858	-0.877451	0	0.179	1
Higd1a	0.0443858	-0.906721	0	0.179	1
Dact3	0.0443858	-0.77319	0	0.179	1
Rtn4	0.0443858	-0.847298	0	0.179	1
Acyp2	0.0443858	-0.911517	0	0.179	1
Hmgcs1	0.0443858	-1.23906	0	0.179	1
Pin1	0.0443858	-0.971861	0	0.179	1
Zfp106	0.0443858	-1.64453	0	0.179	1
Pmvk	0.0443858	-1.7595	0	0.179	1
Ppdpf	0.0443859	-0.517943	0	0.179	1
Fis1	0.0443859	-0.612608	0	0.179	1
Nenf	0.0443859	-0.638087	0	0.179	1
Anapc13	0.0443859	-0.687177	0	0.179	1
Nme1	0.0446032	-1.05812	0.091	0.286	1
Calm3	0.0448922	-1.52623	0.818	0.774	1
Nefl	0.0453786	1.36579	1	0.5	1
Sptssa-Eapp	0.0464523	1.01911	0.273	0.06	1
Tp53inp1	0.0470147	0.927089	0.364	0.214	1
Smpd3	0.0474435	1.45389	0.182	0.048	1
Atp5po	0.0475862	-1.14106	0.636	0.75	1
Ndufs7	0.048569	-1.18928	0.091	0.274	1
AABR07072283.1-MetazoaSRP	0.0489456	0.784778	0.273	0.083	1
Ncan	0.0490764	2.30295	0.182	0.071	1
Fbll1	0.049484	0.851788	0.182	0.048	1
Ptma-249998	0.0517648	1.2082	0.273	0.179	1
Dusp3	0.0528721	-0.79493	0	0.167	1
Eif3j	0.0528721	-0.821457	0	0.167	1
Igfbp3	0.0528721	-0.976355	0	0.167	1
Hdac9	0.0528721	-0.842183	0	0.167	1
Lsm12	0.0528721	-0.897059	0	0.167	1
Mrpl21	0.0528721	-1.08664	0	0.167	1
Rpl7	0.0528721	-1.04145	0	0.167	1
Paxx	0.0528721	-1.46359	0	0.167	1
LOC108352127	0.0528721	-1.11045	0	0.167	1
Rpl18	0.0528721	-0.805625	0	0.167	1
Mrpl52	0.0528721	-1.31539	0	0.167	1
Cyfip2	0.0528721	-0.510826	0	0.167	1
Snrnp27	0.0528721	-0.77319	0	0.167	1
Hnrnpu	0.0528721	-0.733969	0	0.167	1
Lamtor4	0.0528721	-0.65678	0	0.167	1
Pik3ca	0.0528721	-1.10652	0	0.167	1
Slc32a1	0.0528721	-0.831873	0	0.167	1
Mef2a	0.0528721	-0.784119	0	0.167	1
Tubb3	0.0528721	-0.739667	0	0.167	1
Cyc1	0.053107	-1.55752	0.091	0.286	1
Smdt1	0.0531129	-1.41176	0.455	0.524	1
Ywhaz	0.0539372	1.23088	0.455	0.298	1
Txnl4a-RGD1560212	0.0542367	-1.30225	0.091	0.262	1
Ckb	0.0543179	0.809496	0.818	0.476	1
Arfgef3	0.0548729	1.47154	0.273	0.071	1
Psmb4	0.0552385	1.56756	0.364	0.214	1
Cdh13	0.0574322	0.597837	0.273	0.06	1
Sqle	0.0574883	1.74524	0.182	0.095	1
Lasp1	0.0589049	0.577634	0.182	0.024	1
Psmd12	0.0595466	1.015	0.273	0.095	1
Tcerg1	0.0601069	0.817899	0.182	0.048	1
Ptpn4	0.0629474	-0.921041	0	0.155	1
C1qbp	0.0629474	-0.847298	0	0.155	1
Coa3	0.0629474	-1.10652	0	0.155	1
Dld	0.0629474	-1.21816	0	0.155	1
LOC100911177	0.0629474	-0.784119	0	0.155	1
Zmat3	0.0629474	-1.29928	0	0.155	1
Ppp3cb	0.0629474	-0.687177	0	0.155	1
Eid1	0.0629474	-0.532028	0	0.155	1
AABR07017145.2	0.0629474	-0.872488	0	0.155	1
Zrsr2	0.0629474	-0.586463	0	0.155	1
LOC102549726-RT1-CE14	0.0629474	-0.816207	0	0.155	1
Prkar2a	0.0629474	-0.599621	0	0.155	1
Hadha	0.0629474	-0.784119	0	0.155	1
Mapk1	0.0629474	-0.745333	0	0.155	1
Sdha	0.0629474	-0.953678	0	0.155	1
Cdk14	0.0629474	-0.77319	0	0.155	1
Grin2b	0.0629474	-0.710847	0	0.155	1
Wwp1	0.0629474	-0.722475	0	0.155	1
Bnc1-Hdgfl3	0.0629474	-0.733969	0	0.155	1
Ndrg3	0.0629474	-0.681171	0	0.155	1
Smim29	0.0629474	-0.821457	0	0.155	1
Dnmt3a	0.0629474	-0.716678	0	0.155	1
Cep170b	0.0632911	2.08311	0.273	0.095	1
Cpe	0.0654186	1.37124	0.273	0.155	1
Susd4	0.0655696	0.948908	0.273	0.06	1
Nolc1	0.0657524	1.99752	0.182	0.083	1
LOC687780	0.068264	-1.31595	0.455	0.488	1
Ndufab1	0.0698766	-1.34246	0.273	0.417	1
Ubl5	0.0701228	-0.75003	0.091	0.286	1
Wdr37	0.0704282	0.708869	0.273	0.083	1
Atxn7l3b	0.0717707	-1.87777	0.273	0.369	1
Abhd8	0.0732937	-1.00363	0.091	0.25	1
Coprs	0.0749213	-0.831873	0	0.143	1
Srpk2	0.0749213	-0.842183	0	0.143	1
Auh	0.0749213	-1.00726	0	0.143	1
Mrpl42	0.0749213	-0.831873	0	0.143	1
Eif1b	0.0749213	-0.867501	0	0.143	1
Pfdn5	0.0749213	-0.831873	0	0.143	1
Oxr1	0.0749213	-1.21463	0	0.143	1
Mcts1	0.0749213	-1.30576	0	0.143	1
Acat1	0.0749213	-0.66905	0	0.143	1
Dennd5a	0.0749213	-0.949081	0	0.143	1
Dpm2	0.0749213	-0.85745	0	0.143	1
Kdm5a	0.0749213	-0.510826	0	0.143	1
Sec61b	0.0749213	-0.980829	0	0.143	1
Strbp	0.0749213	-0.532028	0	0.143	1
Parp6	0.0749213	-0.566395	0	0.143	1
Hdgf	0.0749213	-0.593064	0	0.143	1
Kpnb1	0.0749213	-0.510826	0	0.143	1
Dlg2	0.0749213	-0.579818	0	0.143	1
Fam20b	0.0749213	-0.842183	0	0.143	1
Vdac2	0.0749213	-0.545917	0	0.143	1
Cacnb4	0.0749213	-0.559616	0	0.143	1
Suclg1	0.0749213	-0.619039	0	0.143	1
Ift20	0.0749213	-0.699082	0	0.143	1
Ccdc28b	0.0749213	-0.693147	0	0.143	1
Hip1	0.0749213	-0.566395	0	0.143	1
Dnajc5	0.0749213	-0.612608	0	0.143	1
2510009E07Rik	0.0749213	-0.892193	0	0.143	1
Cbx5	0.0749213	-0.897059	0	0.143	1
Phyhipl	0.0749213	-0.716678	0	0.143	1
Nat8l	0.0749213	-1.03302	0	0.143	1
Cnrip1	0.0749213	-1.24936	0	0.143	1
Kiaa0408L	0.0749213	-0.847298	0	0.143	1
Atp6v1b2	0.0753167	-1.34418	0.182	0.357	1
Upf2	0.0755304	0.860201	0.364	0.167	1
Ccar1	0.0768616	1.48549	0.182	0.048	1
Atp5mc2	0.0786443	-1.03668	0.273	0.452	1
Gad1	0.0787599	-1.38191	0.455	0.476	1
Pkig	0.080323	1.09543	0.182	0.06	1
Ik	0.08062	0.753725	0.182	0.036	1
Sptbn2	0.0817151	1.47619	0.273	0.19	1
Map3k12	0.0820305	0.92483	0.182	0.119	1
Rpl15	0.082198	-0.871244	0.091	0.25	1
Tnpo3	0.0823248	0.895843	0.182	0.083	1
Clstn1	0.0832165	0.8566	0.182	0.071	1
Chmp7	0.0835367	1.08002	0.182	0.024	1
Sergef	0.0841421	0.523567	0.182	0.048	1
Rab14	0.0859945	-1.09894	0.091	0.262	1
P4hb	0.0868533	1.01356	0.182	0.036	1
Ap1b1	0.0868928	0.871508	0.182	0.06	1
Ddn	0.0875769	1.6652	0.182	0.095	1
Rbm8a	0.0878705	1.4879	0.182	0.071	1
Bhlhb9-Gprasp1	0.0891728	-1.03724	0	0.131	1
Spag9	0.0891728	-0.998529	0	0.131	1
2020-09-11	0.0891728	-0.901902	0	0.131	1
Trappc8-B4galt6-Mapre2	0.0891728	-1.09464	0	0.131	1
Son	0.0891728	-0.949081	0	0.131	1
Ankrd12	0.0891728	-1.00726	0	0.131	1
Tsc2	0.0891728	-1.14134	0	0.131	1
Clpb	0.0891728	-1.35301	0	0.131	1
Pgls	0.0891728	-1.07451	0	0.131	1
Cisd2	0.0891728	-0.892193	0	0.131	1
Fdx2	0.0891728	-1.04982	0	0.131	1
Picalm	0.0891728	-0.532028	0	0.131	1
Ubl3	0.0891728	-0.789539	0	0.131	1
Retreg2	0.0891728	-0.65678	0	0.131	1
Mrps34	0.0891728	-0.566395	0	0.131	1
Mast2	0.0891728	-0.66905	0	0.131	1
Bnip3l	0.0891728	-0.612608	0	0.131	1
Ash1l	0.0891728	-0.586463	0	0.131	1
Kcnip4	0.0891728	-0.778669	0	0.131	1
Ncald	0.0891728	-0.716678	0	0.131	1
Plppr5	0.0891728	-0.662933	0	0.131	1
Rab27b	0.0891728	-0.739667	0	0.131	1
Atp8a2	0.0891728	-0.662933	0	0.131	1
Cep19	0.0891728	-0.831873	0	0.131	1
Ssu72	0.0891728	-0.939821	0	0.131	1
Actr10	0.0891728	-0.716678	0	0.131	1
Rb1cc1	0.0891728	-0.837041	0	0.131	1
6430548M08Rik	0.0891728	-0.750967	0	0.131	1
Mrpl55	0.0891728	-0.826679	0	0.131	1
Hp1bp3	0.0891728	-0.980829	0	0.131	1
Serbp1	0.0914885	0.874141	0.364	0.119	1
Hist3h2ba	0.0930619	0.850226	0.182	0.107	1
Slitrk5	0.09564	0.665319	0.182	0.036	1
Acsl5	0.0963451	0.754047	0.182	0.024	1
Gng10	0.0970529	0.934309	0.182	0.083	1
Ppib	0.0988159	1.29961	0.182	0.095	1
Taok1	0.0992106	1.16108	0.273	0.179	1
Paf1	0.0996073	0.661016	0.273	0.119	1
Uba52	0.100952	-0.596266	0.727	0.81	1
Serpini1	0.104778	0.848049	0.182	0.083	1
Timm13	0.105273	-1.03745	0.273	0.44	1
Ndufb11	0.106151	-1.65449	0.364	0.405	1
Pcdh9	0.106171	-1.11436	0	0.119	1
Csnk2a1	0.106171	-0.650588	0	0.119	1
Lrrc73	0.106171	-1.24251	0	0.119	1
Alkbh7	0.106171	-0.722475	0	0.119	1
Pcp4l1	0.106171	-1.26628	0	0.119	1
Cnr1	0.106171	-1.1968	0	0.119	1
Fastk	0.106171	-0.586463	0	0.119	1
Cab39	0.106171	-1.40982	0	0.119	1
Csnk1a1	0.106171	-0.538997	0	0.119	1
Crtac1	0.106171	-0.789539	0	0.119	1
Pdlim7	0.106171	-0.52501	0	0.119	1
Tbc1d9	0.106171	-0.52501	0	0.119	1
Zfr	0.106171	-0.612608	0	0.119	1
Atp6v0a1	0.106171	-0.593064	0	0.119	1
Trnp1	0.106171	-0.625429	0	0.119	1
Sgtb	0.106171	-0.76768	0	0.119	1
Mrpl34	0.106171	-0.739667	0	0.119	1
Nacc2	0.106171	-0.733969	0	0.119	1
LOC100909912	0.106171	-0.612608	0	0.119	1
Ppip5k2	0.106171	-0.65678	0	0.119	1
Nefh	0.106171	-0.681171	0	0.119	1
Ubac1	0.106171	-0.76214	0	0.119	1
Tmcc2	0.106171	-0.882389	0	0.119	1
Herc2	0.106171	-0.644357	0	0.119	1
LOC689574	0.106171	-0.716678	0	0.119	1
Gstp1	0.106171	-0.716678	0	0.119	1
Adcy1	0.106171	-0.831873	0	0.119	1
Mcf2l	0.106171	-0.745333	0	0.119	1
Klhl24	0.106171	-0.716678	0	0.119	1
Mapk9	0.106171	-0.826679	0	0.119	1
Ift57	0.106171	-0.826679	0	0.119	1
Xkr6	0.106171	-0.816207	0	0.119	1
Zfp91	0.106171	-0.800292	0	0.119	1
Dync1li2	0.106171	-0.989718	0	0.119	1
Psmg3	0.106171	-0.826679	0	0.119	1
Nr2f1	0.106171	-0.538997	0	0.119	1
Fam57b	0.106171	-0.867501	0	0.119	1
Ube2j1	0.106171	-0.842183	0	0.119	1
Lage3-Ubl4a	0.106388	-1.45657	0.182	0.262	1
Hspd1	0.106902	-0.975233	0.091	0.238	1
St8sia3	0.107511	1.21863	0.182	0.107	1
Tmsb10	0.109979	-0.552143	0.909	0.929	1
Tmed10	0.11259	1.13998	0.182	0.048	1
Cdc42	0.112835	-1.22242	0.273	0.321	1
Cox17	0.113777	-0.530001	0.364	0.56	1
Slc15a4	0.115573	0.551317	0.182	0.048	1
Rps26	0.119076	-0.552333	0.273	0.429	1
Kpna1	0.119122	1.00982	0.182	0.048	1
Vsnl1	0.120019	0.96737	0.182	0.107	1
Camk2b	0.120247	0.910356	0.273	0.19	1
Got2	0.120662	-1.05052	0.091	0.214	1
Anapc11	0.120865	-1.0953	0.091	0.202	1
Dpcd	0.12123	-1.17978	0.182	0.262	1
Zer1	0.122238	0.63951	0.273	0.083	1
Oip5	0.123065	-1.31833	0.182	0.25	1
Mgrn1	0.123936	0.682995	0.182	0.071	1
Rundc3a	0.124883	-1.35147	0.091	0.214	1
Mgst3	0.125728	-0.724674	0.273	0.44	1
Dlgap1	0.125843	-0.97934	0.091	0.202	1
Pclo	0.126156	-0.775477	0.091	0.214	1
Tomm22	0.126506	-1.08261	0	0.107	1
Gars	0.126506	-0.77319	0	0.107	1
Npm1	0.126506	-0.566395	0	0.107	1
Wnk1	0.126506	-0.76768	0	0.107	1
Mindy2	0.126506	-0.971861	0	0.107	1
Pnkd-249879	0.126506	-0.538997	0	0.107	1
Rpl5	0.126506	-0.532028	0	0.107	1
Bola1	0.126506	-0.532028	0	0.107	1
Egln2	0.126506	-0.52501	0	0.107	1
LOC691807	0.126506	-0.52501	0	0.107	1
Ube3a	0.126506	-0.699082	0	0.107	1
Tsc22d3	0.126506	-0.593064	0	0.107	1
Cdk16	0.126506	-0.57313	0	0.107	1
Gsto1	0.126506	-0.625429	0	0.107	1
Zeb2	0.126506	-0.517943	0	0.107	1
Hnrnpa2b1	0.126506	-0.545917	0	0.107	1
Ddb1	0.126506	-0.789539	0	0.107	1
Emc4	0.126506	-0.722475	0	0.107	1
Cyp51	0.126506	-0.545917	0	0.107	1
Cdc123	0.126506	-0.599621	0	0.107	1
Btbd6	0.126506	-0.606136	0	0.107	1
Selenoi	0.126506	-0.55279	0	0.107	1
Ubfd1	0.126506	-0.710847	0	0.107	1
Tkt	0.126506	-0.52501	0	0.107	1
Ctdspl-Golga4	0.126506	-0.606136	0	0.107	1
Arl4c	0.126506	-0.704982	0	0.107	1
Chd4	0.126506	-0.606136	0	0.107	1
Crebbp	0.126506	-0.619039	0	0.107	1
Ap1s2	0.126506	-0.872488	0	0.107	1
Poldip2	0.126506	-0.662933	0	0.107	1
Hspa4l	0.126506	-0.739667	0	0.107	1
Rspry1	0.126506	-0.699082	0	0.107	1
Zranb1	0.126506	-0.821457	0	0.107	1
Rnf7	0.126506	-0.852387	0	0.107	1
Itpa	0.126506	-0.612608	0	0.107	1
mrpl24	0.126506	-0.644357	0	0.107	1
Fnbp1l	0.126506	-0.710847	0	0.107	1
Tll1	0.126506	-0.867501	0	0.107	1
Csdc2	0.126506	-0.728239	0	0.107	1
Zfp385d	0.126506	-0.681171	0	0.107	1
Mrpl51	0.126506	-1.09464	0	0.107	1
Ufm1	0.126506	-0.733969	0	0.107	1
1110065P20Rik	0.126506	-1.10257	0	0.107	1
Luc7l3	0.126506	-0.76768	0	0.107	1
Smc6	0.126506	-0.532028	0	0.107	1
Nrcam	0.126506	-0.532028	0	0.107	1
Uhrf1bp1l	0.126506	-0.953678	0	0.107	1
Ss18l2	0.127006	-1.25672	0.091	0.214	1
Cox6b1-004303	0.127086	-0.701446	0.455	0.56	1
Cetn2	0.127213	1.21717	0.182	0.107	1
Gpr162	0.127547	0.727389	0.182	0.06	1
Atp6v0d1-Agrp	0.128633	-1.43628	0.182	0.357	1
Tacc1	0.129034	0.547536	0.182	0.071	1
Atcay	0.130255	-0.686179	0.091	0.214	1
H1f0	0.130652	0.617068	0.182	0.048	1
Ctbp1	0.130696	-0.97111	0.091	0.214	1
Kifap3	0.130729	0.830992	0.364	0.131	1
Ndufs2	0.131653	-1.05487	0.182	0.298	1
Rps23	0.133725	0.851194	0.364	0.274	1
Gria4	0.134881	2.48187	0.182	0.095	1
1110008P14Rik	0.136357	-0.633238	0.091	0.25	1
Peg3	0.136532	-0.685333	0.182	0.274	1
Sqstm1	0.136699	0.968211	0.182	0.071	1
Fez1	0.138535	-0.966139	0.182	0.321	1
Gabbr1-148689	0.138904	0.94312	0.182	0.107	1
Ina	0.13935	-1.17357	0.091	0.226	1
Syngr3	0.139781	-0.975233	0.091	0.202	1
Gria1	0.142164	-0.758715	0.091	0.262	1
Ndn	0.143671	0.701378	0.273	0.155	1
Psma6	0.145555	0.593705	0.182	0.071	1
AABR07037520.1	0.148192	1.55665	0.182	0.048	1
Ndufa2	0.148237	-0.831101	0.727	0.702	1
Shank1	0.14838	0.518794	0.182	0.095	1
Mt1-Mt3-Mt2A	0.152005	0.591364	0.818	0.488	1
Lcmt1	0.154433	0.784778	0.182	0.071	1
Ids	0.158994	0.537894	0.364	0.143	1
Pcmtd1	0.159275	0.704735	0.182	0.06	1
Smarce1	0.159494	0.75349	0.182	0.071	1
Plppr4	0.160043	1.36702	0.182	0.155	1
Abcf1	0.160099	0.830512	0.273	0.119	1
LOC103692691	0.161389	-0.898272	0.636	0.607	1
3830406C13Rik	0.16141	1.04252	0.182	0.083	1
Nme3	0.161568	1.87542	0.273	0.107	1
Rpl10	0.162158	-0.525597	0.091	0.19	1
Ndufa3	0.162948	-0.652656	0.636	0.69	1
Ppp1r9a	0.163817	0.744083	0.182	0.048	1
Psma7	0.163839	-1.2361	0.364	0.429	1
Mapt	0.164496	-0.670674	0.091	0.286	1
Neto1	0.165314	1.25016	0.182	0.095	1
AABR07072748.2	0.165469	-1.05487	0.182	0.298	1
Dnaja1	0.1716	0.700962	0.273	0.19	1
Slc6a17	0.17262	0.532968	0.182	0.071	1
Dpysl2	0.173372	-1.06459	0.273	0.274	1
Pak3	0.173706	1.59994	0.273	0.19	1
Ppp1ca	0.174081	1.07102	0.182	0.083	1
Brk1	0.174304	-0.824506	0.091	0.179	1
Eif4g2	0.174856	0.905322	0.273	0.226	1
Zranb2	0.177621	0.669617	0.182	0.06	1
Rps15	0.181037	-0.77222	0.273	0.393	1
Zyg11b	0.183389	0.978761	0.182	0.107	1
Slc30a9	0.187334	-0.995601	0.091	0.179	1
Rpl24	0.189495	-0.851879	0.364	0.452	1
Cox5a	0.190253	-0.898272	0.364	0.452	1
Marcks	0.190676	-0.595086	0.091	0.226	1
Rpl28	0.190799	0.511895	0.273	0.143	1
Fam162a	0.191993	-0.804485	0.182	0.274	1
Arl8a	0.192276	-0.911517	0.091	0.179	1
Cbx6	0.193697	-0.990982	0.273	0.298	1
Atp2b2	0.196382	-1.00405	0.182	0.321	1
Fam168a	0.196773	0.868712	0.182	0.071	1
Ncl	0.198039	0.90556	0.273	0.202	1
AABR07007997.1	0.201301	0.71562	0.273	0.155	1
Aes	0.204944	-1.04833	0.091	0.238	1
Minos1	0.204964	-0.884849	0.273	0.417	1
Gnaq	0.205043	1.18667	0.273	0.167	1
Adck2-Ndufb2	0.206024	-1.09554	0.636	0.607	1
Babam2	0.206404	-0.817225	0.455	0.5	1
Birc6	0.206654	0.776085	0.182	0.119	1
Myl6	0.207494	-0.608475	0.636	0.702	1
Dnajc8	0.208034	0.800778	0.273	0.107	1
Rex1bd	0.208931	1.54279	0.273	0.119	1
Gda	0.209546	-1.03391	0.182	0.321	1
Fbxo44-Fbxo6	0.211616	0.535402	0.182	0.107	1
Polr2k	0.216466	-0.770439	0.182	0.298	1
Chl1	0.216704	0.751988	0.182	0.083	1
Gng13	0.217147	0.716586	0.182	0.071	1
Anapc5	0.218657	1.78161	0.182	0.143	1
Sncb	0.218998	-0.544767	0.182	0.369	1
Atp6v0e2	0.22021	-0.97111	0.182	0.321	1
Higd2a	0.220223	-0.669558	0.091	0.155	1
Vnn3	0.221122	1.07467	0.182	0.155	1
Fhl1	0.221217	0.528844	0.182	0.083	1
Ndufc1	0.224811	0.510215	0.455	0.583	1
Zcchc17	0.225484	-1.15343	0.091	0.226	1
Tcf25	0.227421	-1.17145	0.364	0.44	1
Vps35	0.228112	0.981937	0.182	0.071	1
Dbi	0.2306	-0.731824	0.182	0.274	1
Grm4-Mtch1	0.238525	-0.935984	0.273	0.345	1
Slc25a11	0.239775	-0.884849	0.091	0.143	1
Arpc2	0.240172	0.659531	0.182	0.119	1
Tmem178b	0.243215	1.32559	0.182	0.238	1
Dynll2	0.244179	-0.889108	0.364	0.429	1
Ndufa11	0.246182	-0.782986	0.455	0.488	1
Tmem59l	0.247266	-0.739667	0.091	0.143	1
Map4	0.247563	-0.800292	0.091	0.25	1
Panx2	0.247765	0.796909	0.182	0.107	1
Osbpl1a	0.248492	-0.695434	0.091	0.19	1
Ap2s1	0.248621	-0.51261	0.091	0.274	1
Hcn1	0.251605	1.63965	0.182	0.119	1
Otub1	0.256686	-0.886926	0.091	0.179	1
Ckmt1	0.257751	-0.646141	0.091	0.214	1
Pgam1	0.26036	-0.699821	0.273	0.31	1
Anks1b	0.264781	0.894463	0.182	0.071	1
Nfib-190674	0.265691	0.794547	0.182	0.119	1
Rps16	0.268614	-0.53778	0.636	0.607	1
Cisd1	0.26892	-0.961494	0.636	0.571	1
Ecpas	0.269489	-0.635463	0.091	0.155	1
Mrpl43	0.270079	-0.827079	0.091	0.167	1
Ndufa13	0.272616	-0.628835	0.364	0.512	1
Kif1a	0.273197	-0.610412	0.364	0.464	1
Pcdh11x	0.274229	-1.07741	0.182	0.238	1
Arpc3	0.274295	-0.557346	0.091	0.143	1
Phpt1	0.276058	-0.683978	0.273	0.286	1
Ost4	0.278174	-0.709814	0.091	0.25	1
Rpl17	0.278326	-0.553768	0.091	0.226	1
Aldoa	0.280169	0.557748	0.636	0.464	1
Mrpl20	0.286052	0.772921	0.273	0.179	1
Sucla2	0.289295	-0.993582	0.273	0.31	1
Tmod2	0.289344	1.0904	0.273	0.202	1
Lsamp	0.289876	0.539797	0.818	0.583	1
Alg8-Ndufc2	0.289902	-0.543793	0.182	0.321	1
Glrx2	0.290575	-1.31698	0.091	0.19	1
Stub1	0.292745	-0.51261	0.091	0.226	1
Prdx5	0.29618	-0.739667	0.182	0.25	1
Polr2f	0.296546	-0.705434	0.182	0.202	1
Apbb1	0.297075	-0.731824	0.091	0.226	1
Aco2	0.301117	-0.798392	0.455	0.5	1
Lancl1	0.301492	0.820365	0.182	0.131	1
LOC100910827	0.301838	-0.653467	0.364	0.44	1
Prkar1b	0.302065	1.04532	0.182	0.155	1
Cyp3a2-Arpc1a	0.30389	-0.612071	0.091	0.131	1
Ndufv3-148199	0.304492	1.07078	0.273	0.321	1
Sdhb	0.305343	-0.729196	0.091	0.155	1
Pja2	0.306135	-0.596566	0.091	0.226	1
Atxn10	0.306793	-0.538418	0.091	0.131	1
Uqcrfs1	0.308581	-0.788457	0.182	0.286	1
Mllt11	0.309152	-1.12743	0.273	0.321	1
Dzip1	0.309346	-1.1547	0.091	0.167	1
Rufy3	0.309364	1.24097	0.273	0.226	1
Nsmf	0.309404	0.714538	0.364	0.25	1
Ywhag	0.311246	-0.61531	0.273	0.452	1
Eef2	0.319532	1.42308	0.636	0.536	1
Nars	0.31961	0.518149	0.182	0.131	1
Msra	0.320368	-0.563576	0.091	0.131	1
Gas7	0.321163	0.814508	0.182	0.131	1
MetazoaSRP-250941	0.325343	0.628051	0.182	0.131	1
Selenof	0.328952	-0.508075	0.091	0.179	1
Nedd8	0.329723	0.985341	0.545	0.369	1
Gpr35-Gpc1-Aqp12a-Olr1349-Olr1353-Olr1352-Olr1346-Olr1347-Ppp1r7-Rnpepl1-Olr1351-Sned1-Capn10-Agxt-Olr1350	0.331969	-0.715335	0.091	0.155	1
Epm2aip1	0.33339	-1.27213	0.091	0.131	1
Pnma8b	0.342705	1.39107	0.182	0.143	1
Amfr	0.343271	0.661741	0.182	0.107	1
Sult4a1	0.343339	-0.821905	0.364	0.393	1
Arl3	0.349121	1.53254	0.091	0.107	1
Git1	0.352396	1.41825	0.182	0.179	1
Fabp5	0.353007	-0.780001	0.455	0.488	1
Dctn3	0.353553	-0.75209	0.182	0.214	1
Rbis	0.353559	0.798177	0.182	0.167	1
Atp6v1g2-RT1-CE14	0.35751	-1.15731	0.091	0.214	1
Rbx1	0.360698	-0.702812	0.273	0.333	1
Cplx2	0.368412	-1.06682	0.364	0.357	1
Atox1	0.370657	-0.611413	0.364	0.417	1
Bex3	0.37159	-0.687868	0.364	0.345	1
Pkp4	0.371793	1.66973	0.182	0.167	1
Pfdn2	0.372913	-0.589515	0.091	0.131	1
Ppm1h	0.37837	0.537428	0.182	0.119	1
Mpc2	0.378604	-1.00011	0.364	0.345	1
Cited2	0.379318	1.2375	0.182	0.131	1
Eif1	0.380615	-0.86972	0.091	0.238	1
Uqcr11	0.380722	-0.971469	0.818	0.702	1
App	0.381763	1.39483	0.273	0.226	1
Pdpk1	0.385153	0.90691	0.091	0.107	1
Serp2	0.385943	-0.536543	0.091	0.25	1
Arf5	0.387588	2.01435	0.091	0.143	1
Erlec1	0.388074	-0.947062	0.091	0.202	1
Glrx3	0.389315	-0.612071	0.091	0.107	1
Mdh1	0.390115	-0.624337	0.455	0.464	1
Rabep1	0.390349	0.55768	0.182	0.155	1
Sos2-207693	0.391586	1.66233	0.091	0.107	1
Celf2	0.392086	-0.827079	0.091	0.155	1
Myh10	0.393588	-0.576283	0.091	0.202	1
Fkbp3	0.394793	0.590917	0.273	0.25	1
Oxa1l	0.396105	-0.723919	0.091	0.119	1
Gpi	0.397521	1.13444	0.182	0.167	1
Ppp1r9b	0.399022	-0.64304	0.091	0.238	1
Hk1	0.401426	0.920224	0.182	0.179	1
Guk1	0.404116	-1.12898	0.364	0.381	1
Glrx5	0.411301	-0.695748	0.091	0.167	1
Gpm6a	0.412825	0.622278	0.273	0.214	1
Rpl23	0.414677	-0.602558	0.364	0.429	1
Fem1b	0.416377	-0.622485	0.091	0.131	1
Ndufa9	0.416828	-0.880335	0.091	0.119	1
Atp6v1d	0.419386	-0.779489	0.091	0.238	1
Eef1b2	0.421225	-0.563576	0.091	0.107	1
Fam32a	0.423284	-0.702528	0.091	0.107	1
Tmem160	0.423467	-0.507104	0.182	0.262	1
Ank2.1	0.427146	-0.925769	0.273	0.345	1
Smap1	0.428045	-0.744463	0.091	0.131	1
Ndufb7	0.428604	1.23761	0.727	0.583	1
Maged1	0.428907	-0.521718	0.091	0.167	1
Dnajc15	0.434441	-0.932958	0.273	0.238	1
Slc25a3	0.435973	-0.710847	0.364	0.393	1
Clasp2	0.439309	-0.755981	0.091	0.202	1
Cst3	0.443463	-1.03745	0.364	0.345	1
Oxct1	0.446553	-1.08198	0.364	0.393	1
Itm2c	0.447161	1.21262	0.091	0.107	1
Atp6v1e1	0.451617	1.2966	0.364	0.321	1
Trappc1	0.452085	-0.760286	0.091	0.107	1
Ndufs3-Ptpmt1	0.452279	-0.690693	0.091	0.167	1
Ran	0.452844	1.09278	0.273	0.262	1
Ccng1	0.453357	0.87113	0.182	0.143	1
Fgf13	0.455027	1.33977	0.091	0.155	1
Ppp2r2c	0.458953	0.686632	0.182	0.226	1
Pafah1b2	0.46045	-0.840208	0.091	0.131	1
Chd3	0.463973	-0.884849	0.182	0.25	1
Usp9x	0.463975	-0.506052	0.091	0.107	1
Ube2k	0.465326	0.639301	0.182	0.167	1
Cmpk1	0.466983	-0.962811	0.091	0.155	1
Mrpl14	0.468681	1.27382	0.091	0.131	1
Tspyl4	0.471124	-0.714349	0.273	0.274	1
Pfdn1	0.471771	0.525846	0.182	0.369	1
Rabac1	0.472981	-0.684607	0.091	0.131	1
Naa38	0.475399	-0.906492	0.364	0.333	1
Pet100	0.476291	-1.07316	0.091	0.107	1
Rgs2	0.480004	-0.735984	0.091	0.179	1
Nme2	0.480905	0.804256	0.727	0.512	1
Rpl35	0.481936	0.517366	0.818	0.726	1
Atp6v1c1	0.482038	-0.788457	0.091	0.167	1
Kif5c	0.486523	-0.544767	0.818	0.726	1
Rpl14	0.491155	1.26534	0.364	0.298	1
Rplp0	0.49148	-1.19367	0.455	0.429	1
Thra	0.499214	1.45932	0.273	0.214	1
Ano10	0.503873	0.995678	0.091	0.131	1
Cd47	0.508373	1.51279	0.091	0.119	1
Kcna2	0.509751	2.19144	0.091	0.179	1
Bri3bp	0.510936	-0.831475	0.091	0.119	1
Atp6v1g1-Tmem268	0.514171	-0.802962	0.273	0.298	1
Arnt2	0.516859	0.541848	0.182	0.19	1
Aff4	0.519042	1.18949	0.091	0.107	1
Lamtor2	0.522936	1.77947	0.182	0.274	1
Necab2	0.526233	1.11945	0.091	0.119	1
Ensa	0.52659	-0.723919	0.273	0.321	1
Cx3cl1	0.530169	1.26239	0.091	0.119	1
Kras	0.530527	0.759956	0.182	0.179	1
Rnf214	0.531613	-0.698659	0.182	0.202	1
Rab3gap2	0.532532	-0.877097	0.091	0.119	1
Psmb5-AC109100.1	0.534759	-1.10567	0.091	0.143	1
Calm2-073484	0.537376	0.664646	0.364	0.333	1
Zbtb47	0.537884	0.768795	0.091	0.119	1
Cdip1	0.539574	-1.16283	0.182	0.167	1
Atp6v1a	0.542645	-0.85745	0.091	0.131	1
Arf1	0.547357	-0.536292	0.182	0.238	1
Klhl13	0.549194	-0.942008	0.091	0.143	1
Kif5a	0.551592	-0.76436	0.545	0.452	1
Eif3f	0.559644	0.55852	0.182	0.143	1
Celf4	0.560995	-0.526518	0.091	0.119	1
Map7d2	0.563208	-0.565128	0.091	0.143	1
Cracd	0.563636	-0.818036	0.182	0.226	1
Snx10	0.564914	0.898649	0.364	0.286	1
Tubb2a	0.568688	-0.7033	0.273	0.31	1
Acot7	0.569823	-0.765643	0.182	0.226	1
Atp5mc1	0.581349	-0.912366	1	0.774	1
Serf2	0.589497	-0.528818	0.545	0.476	1
Mrps33	0.59149	-0.555421	0.091	0.107	1
Dgkz	0.597466	-0.724852	0.091	0.143	1
Rab11b	0.603974	1.25689	0.091	0.155	1
Sec62	0.604151	-0.509144	0.091	0.155	1
Pak1	0.605771	-0.616288	0.091	0.119	1
Pum2	0.608253	0.91369	0.091	0.119	1
Mapk8ip1	0.609202	-0.829279	0.182	0.25	1
Mrps24	0.612052	-1.43628	0.091	0.131	1
Bloc1s1	0.61563	0.919603	0.273	0.274	1
Bmi1-Commd3	0.624231	-0.543793	0.182	0.107	1
Spcs2	0.626939	-0.585517	0.091	0.107	1
Borcs7	0.632106	0.627579	0.091	0.107	1
Dgkd	0.633139	-0.628212	0.091	0.119	1
Bex2	0.633863	0.914004	0.818	0.702	1
Phf14	0.637385	0.679779	0.091	0.107	1
Cfdp1	0.643618	0.869771	0.091	0.143	1
Tomm20	0.644826	-0.8685	0.364	0.167	1
Ddah1	0.652574	0.671945	0.091	0.131	1
Dctn6	0.655026	-0.567587	0.091	0.131	1
Pmm1	0.658061	-0.952229	0.182	0.179	1
Canx	0.659019	-0.93014	0.091	0.119	1
Srp14	0.661685	0.69792	0.182	0.238	1
Cpeb3	0.662345	0.75818	0.091	0.119	1
Csde1	0.667405	-0.91527	0.091	0.107	1
LOC102555659	0.669648	-1.32827	0.091	0.119	1
Tuba4a	0.679156	0.604068	0.182	0.202	1
Ndufb10	0.686394	-0.655178	0.273	0.274	1
Ywhah	0.693148	0.505216	0.273	0.274	1
Rab3a	0.693415	-0.630468	0.455	0.44	1
Slc25a17-St13	0.693897	-0.636907	0.182	0.167	1
Slk	0.70415	-0.789857	0.091	0.131	1
Churc1	0.709626	0.676128	0.091	0.119	1
Tbca	0.70997	0.511708	0.091	0.262	1
Pcnp	0.714829	-0.603155	0.182	0.238	1
Mrpl12	0.721322	0.848864	0.091	0.31	1
Pkia	0.768668	0.759105	0.091	0.167	1
Rpl34	0.775018	0.676186	0.364	0.393	1
Scg2	0.779259	-0.657429	0.182	0.179	1
Nop10	0.784237	0.594667	0.273	0.321	1
Tubb2b	0.785177	0.788403	0.091	0.25	1
Eps15	0.788074	-0.510429	0.091	0.119	1
Dlat	0.788448	-0.832449	0.091	0.107	1
Tspan3	0.795851	0.823084	0.182	0.19	1
Syn2	0.801418	-0.516524	0.182	0.131	1
Cfl2	0.802695	1.19667	0.091	0.214	1
Akap11	0.806767	0.930948	0.091	0.25	1
Pdhb	0.821632	-0.643253	0.091	0.119	1
Snrpd2	0.825317	0.548357	0.091	0.155	1
Gng2	0.833856	0.964573	0.091	0.262	1
Cit	0.850784	0.847298	0.091	0.238	1
Numbl	0.852193	0.680075	0.091	0.202	1
Sem1	0.859458	-0.540539	0.455	0.345	1
Map2	0.870918	0.574998	0.909	0.833	1
Mrpl48	0.875748	1.33104	0.091	0.214	1
Sec61g	0.88223	1.05583	0.182	0.286	1
Slc25a4	0.884237	0.645333	0.909	0.774	1
Btbd1	0.884382	1.04026	0.091	0.202	1
Adgrl1	0.885044	-0.567296	0.273	0.143	1
Nap1l1	0.890127	0.504977	0.091	0.131	1
Mlf2	0.891515	-0.515701	0.273	0.19	1
Mrps18a	0.911157	-0.825189	0.182	0.131	1
Malat1	0.914148	1.01435	0.636	0.607	1
Jund	0.923379	1.05552	0.091	0.262	1
Becn1	0.94983	-0.623835	0.091	0.107	1
GL.11587	0.950049	0.718601	0.273	0.31	1
Akap12	0.951118	1.03067	0.182	0.25	1
N4bp2l2	0.96403	0.551317	0.273	0.31	1
Chchd10	0.969244	0.596755	0.091	0.238	1
Prkcz	0.969908	-0.746993	0.182	0.107	1
Pitpna	0.970273	-0.535867	0.182	0.179	1
Limk1	0.982522	-0.691658	0.182	0.143	1
Senp6	0.991763	-0.597167	0.182	0.095	1
Atp6v1f	0.994184	0.683329	0.364	0.369	1

## Sheet: Somata_GABA1_vs_GABA2-3
Gene_Name	p-value	Avg_logFC	pct.GABAergic1	pct.GABAergic2&3	adj_p-value
Cort	1.4037e-51	2.91717	0.99	0.463	1.99999e-47
Pthlh	3.84321e-43	1.88229	1	0.551	5.4758e-39
Rgs2	1.71283e-39	1.60932	0.99	0.837	2.44043e-35
Gap43	2.2033e-37	-2.07413	0.631	0.993	3.13926e-33
Satb1	2.26156e-37	1.48419	0.99	0.592	3.22227e-33
Gpr88	7.22627e-36	1.34535	1	0.81	1.0296e-31
Ift57	1.37759e-32	1.58947	0.981	0.612	1.96279e-28
Tmsb10	3.39757e-32	-1.18588	0.961	1	4.84085e-28
Pnoc	8.9431e-32	1.09296	1	0.932	1.27421e-27
Gabra1	1.47193e-31	1.32515	1	0.714	2.0972e-27
Gpr22	6.79237e-31	1.42252	0.971	0.585	9.67777e-27
Sst	4.46108e-30	1.35045	0.981	0.619	6.35615e-26
Shisa8	1.82938e-28	1.54434	0.699	0.116	2.6065e-24
Phlda1	3.20419e-27	1.34937	0.981	0.551	4.56533e-23
Ppm1l	1.12471e-26	0.943857	1	0.871	1.60249e-22
Adamts15	2.1421e-26	1.4775	0.786	0.184	3.05207e-22
Reln	1.5582e-25	-1.81813	0.757	0.993	2.22012e-21
Gmpr	1.59136e-25	1.4256	0.874	0.483	2.26737e-21
Kcnc2	2.56128e-25	1.07912	0.99	0.776	3.64932e-21
Alkal2	5.37749e-24	1.95746	0.612	0.102	7.66185e-20
Kcnk1	6.6331e-24	1.43502	0.874	0.456	9.45084e-20
Pcdh17	1.01267e-23	1.17804	1	0.952	1.44286e-19
Cplx2	5.04941e-23	-1.9183	0.893	0.986	7.1944e-19
Bmp2	1.0689e-22	1.74048	0.553	0.041	1.52298e-18
Tll1	1.43975e-21	1.02267	0.942	0.531	2.05136e-17
Nefh	4.06206e-21	1.11296	0.99	0.728	5.78763e-17
Cox6a2	6.88629e-21	1.07031	0.961	0.633	9.81158e-17
Id2	7.3948e-21	-2.20589	0.67	0.918	1.05361e-16
Ptpre	1.0027e-20	1.35728	0.854	0.476	1.42865e-16
Osbpl1a	2.1654e-20	0.874082	0.99	0.776	3.08527e-16
Cck	2.943e-20	-3.94446	0.097	0.592	4.19319e-16
Ehd4	3.24056e-20	1.40529	0.68	0.204	4.61715e-16
Pvalb	9.62838e-20	1.36879	0.583	0.068	1.37185e-15
Kcna2	1.02728e-19	0.793299	0.99	0.844	1.46366e-15
Lgi2	1.07924e-19	0.608056	1	1	1.53771e-15
Dnajb4	1.13207e-19	0.995154	0.971	0.673	1.61297e-15
Rnf144b	3.39895e-19	1.32285	0.573	0.068	4.84283e-15
Rgs4	3.47939e-19	1.13215	0.922	0.531	4.95743e-15
Kcns3	5.70821e-19	1.27199	0.68	0.211	8.13306e-15
Zfp804a	7.4217e-19	0.643931	0.951	0.531	1.05744e-14
Cdh13	8.23139e-19	1.08142	0.951	0.619	1.17281e-14
C1ql3	2.0091e-18	1.36356	0.631	0.163	2.86256e-14
Cd24	2.27992e-18	-1.81163	0.272	0.68	3.24843e-14
Vgf	2.80599e-18	0.89309	1	0.891	3.99797e-14
Myo1e	2.93547e-18	1.0799	0.689	0.156	4.18246e-14
Acan	3.37511e-18	0.99352	0.874	0.395	4.80886e-14
Atp5mc3	3.66746e-18	0.517214	1	1	5.22539e-14
Mdh1	4.3136e-18	0.506952	1	1	6.14602e-14
Pcdh9	4.50152e-18	0.699546	1	0.98	6.41376e-14
Kcnc1	6.8778e-18	0.871823	0.981	0.755	9.7995e-14
Ntm	7.03534e-18	0.865519	1	0.769	1.00239e-13
Nxph1	8.68435e-18	0.635796	0.99	0.789	1.23735e-13
Adarb2-094873	1.08262e-17	-2.32345	0.029	0.469	1.54251e-13
Slit2	1.12482e-17	1.20484	0.738	0.299	1.60264e-13
Wif1	1.15054e-17	1.05937	0.854	0.456	1.63929e-13
Syt4	3.71244e-17	0.717006	0.981	0.83	5.28948e-13
Gng2	5.23709e-17	-1.45013	0.728	0.952	7.4618e-13
2510009E07Rik	7.55766e-17	0.787068	0.981	0.837	1.07682e-12
Mpc2	8.89519e-17	0.517476	1	0.993	1.26739e-12
Pcsk1	9.0184e-17	1.31015	0.786	0.374	1.28494e-12
Kcnma1	9.1888e-17	0.676337	0.932	0.51	1.30922e-12
Adarb2-094878	1.30042e-16	-2.72943	0.019	0.429	1.85284e-12
Kcnd3	1.38633e-16	-1.70726	0.689	0.905	1.97524e-12
Chrna7	1.62602e-16	-1.48093	0.505	0.891	2.31676e-12
Adamts8	2.39517e-16	1.75905	0.524	0.116	3.41263e-12
Nnmt	2.62203e-16	1.23956	0.515	0.054	3.73586e-12
Tcap	3.73233e-16	1.03764	0.864	0.469	5.31783e-12
Ankrd34c	4.86177e-16	1.26799	0.515	0.068	6.92704e-12
Scn1b	5.32554e-16	0.942606	0.854	0.544	7.58782e-12
Gadd45g	1.29417e-15	0.876206	0.913	0.565	1.84394e-11
Epha4	1.2972e-15	0.779318	0.883	0.565	1.84826e-11
Ust	1.31495e-15	-1.26221	0.223	0.762	1.87354e-11
Ankrd34b	1.81483e-15	1.00051	0.816	0.449	2.58577e-11
Plxna4	2.02922e-15	0.692576	1	0.81	2.89124e-11
Ttll7	2.47732e-15	0.56773	1	0.952	3.52968e-11
Dnajc18	2.68232e-15	0.702345	0.971	0.803	3.82177e-11
Abhd2	4.9722e-15	0.811312	0.883	0.537	7.08439e-11
Sod2	8.36725e-15	0.546158	0.99	0.959	1.19217e-10
Car2	9.26128e-15	1.18812	0.777	0.476	1.31955e-10
Lynx1	9.73671e-15	0.881201	0.942	0.592	1.38729e-10
Extl2	1.03936e-14	0.755897	0.951	0.755	1.48088e-10
Nsg1	1.40643e-14	0.544226	1	0.993	2.00388e-10
Rcan2	1.41478e-14	0.627657	1	0.918	2.01579e-10
Crtac1	1.49787e-14	0.679458	1	0.952	2.13417e-10
Adcy1	1.8006e-14	0.621382	0.951	0.66	2.56549e-10
Lamb1	2.33825e-14	1.07432	0.631	0.204	3.33154e-10
Lmod3	2.5162e-14	0.957559	0.32	0.007	3.58509e-10
Rgs13	3.00374e-14	1.0798	0.417	0.02	4.27973e-10
Rps6ka5	3.1066e-14	0.692874	0.913	0.524	4.42628e-10
Cemip	3.22041e-14	0.724414	0.981	0.701	4.58844e-10
Miat	3.96327e-14	-1.39059	0.097	0.571	5.64687e-10
Hcn1	5.29518e-14	0.714791	0.99	0.898	7.54457e-10
Inpp5j	6.47819e-14	0.573083	0.874	0.531	9.23013e-10
Ddt-Gstt3	7.7787e-14	0.614145	1	0.898	1.10831e-09
Kcnk3	8.25638e-14	0.896423	0.709	0.32	1.17637e-09
Lpl	9.09129e-14	1.66929	0.573	0.238	1.29533e-09
Ppargc1a	1.17453e-13	0.679269	0.951	0.735	1.67347e-09
LOC102552810	1.22157e-13	0.803107	0.825	0.422	1.74049e-09
Cited2	1.34456e-13	0.598216	1	0.946	1.91573e-09
Trpc3	1.41496e-13	0.811113	0.689	0.272	2.01603e-09
Ghitm	1.49127e-13	0.530537	1	0.993	2.12476e-09
Plcxd3	2.18348e-13	1.01962	0.786	0.456	3.11103e-09
Gria1	2.56288e-13	0.519871	1	0.986	3.65159e-09
Gria3	2.68202e-13	0.508439	0.971	0.626	3.82134e-09
Vamp1	3.19723e-13	0.853979	0.786	0.429	4.55541e-09
Gabrg2	3.65966e-13	0.703386	0.99	0.878	5.21429e-09
Micu1	4.55142e-13	0.653879	0.942	0.673	6.48486e-09
Gpm6a	4.84499e-13	-0.997076	0.971	0.993	6.90314e-09
Cdh18	5.29935e-13	0.753607	0.68	0.211	7.55051e-09
Kcna1	6.29555e-13	0.561492	0.99	0.905	8.9699e-09
Ifit2	8.6886e-13	0.985619	0.476	0.082	1.23795e-08
Gm13889	8.8317e-13	0.692743	0.942	0.755	1.25834e-08
Sez6l	9.1051e-13	-1.314	0.417	0.762	1.29729e-08
Pcdh7	9.91914e-13	0.734665	0.913	0.619	1.41328e-08
Frzb	9.96905e-13	1.08186	0.291	0.014	1.42039e-08
Poldip2	1.12954e-12	0.570841	0.99	0.823	1.60937e-08
Tsc22d3	1.22723e-12	0.568459	0.971	0.728	1.74856e-08
Acyp2	1.26119e-12	0.543799	0.99	0.932	1.79694e-08
Hapln4	1.28935e-12	1.12368	0.65	0.306	1.83706e-08
Cxcl14	1.59125e-12	-1.86403	0.039	0.367	2.26721e-08
Clip4	1.96004e-12	0.806145	0.903	0.612	2.79266e-08
Clu	2.14473e-12	0.721304	0.981	0.816	3.05582e-08
Nfib-190674	4.03699e-12	-1.39183	0.718	0.871	5.75191e-08
Cnr1	4.44856e-12	-2.49693	0.66	0.823	6.33831e-08
Kcnt2	4.71543e-12	-1.67244	0.204	0.571	6.71855e-08
Mon1b	5.10718e-12	0.878952	0.718	0.354	7.27671e-08
Igfbp3	5.18654e-12	0.836492	0.961	0.776	7.38978e-08
Rspo3	5.33081e-12	0.697605	0.932	0.714	7.59534e-08
Esrrg	5.89536e-12	0.687547	0.893	0.565	8.39971e-08
Wnt7a	6.43969e-12	-1.35173	0.146	0.558	9.17526e-08
AABR07007064.1	8.44749e-12	0.684532	0.913	0.619	1.2036e-07
Klf9	9.16415e-12	0.69912	0.699	0.327	1.30571e-07
Uqcrfs1	9.50032e-12	0.528786	1	0.973	1.35361e-07
LOC100911361	9.74498e-12	0.83778	0.505	0.122	1.38846e-07
Cit	1.10192e-11	0.543925	0.913	0.619	1.57001e-07
Kcnn2	1.10803e-11	-1.26528	0.243	0.578	1.57872e-07
Plppr3	1.13032e-11	-1.03776	0.456	0.803	1.61047e-07
Clec2l	1.39231e-11	0.670262	0.932	0.667	1.98376e-07
Mcrip2	1.42617e-11	0.686857	0.883	0.626	2.03201e-07
Dgkg	1.44661e-11	0.669563	0.942	0.653	2.06114e-07
Oxr1	1.47409e-11	0.553432	0.981	0.918	2.10028e-07
Cdc27	1.74432e-11	0.590876	0.932	0.673	2.48531e-07
Pink1-AABR07050212.1	1.76492e-11	0.646691	0.903	0.653	2.51466e-07
Ppip5k2	1.84338e-11	0.550387	1	0.966	2.62645e-07
Ptprt	1.9528e-11	0.642475	0.864	0.565	2.78235e-07
Fam81a	2.08582e-11	0.593646	0.835	0.537	2.97188e-07
Celf6	2.35511e-11	-1.12876	0.126	0.51	3.35557e-07
Dnajc15	2.40779e-11	0.579777	0.942	0.728	3.43062e-07
Gabra4	2.57073e-11	0.670401	0.922	0.694	3.66277e-07
Stac2	2.8242e-11	0.621407	0.573	0.184	4.02392e-07
AABR07006480.1	3.35812e-11	1.13122	0.408	0.082	4.78465e-07
Wasf3	3.51501e-11	0.509989	0.961	0.762	5.00819e-07
Dagla	3.61266e-11	0.706479	0.854	0.551	5.14731e-07
Htr2a	3.75879e-11	0.779566	0.689	0.279	5.35553e-07
Layn	3.94226e-11	0.792667	0.534	0.102	5.61694e-07
Dynlt3	3.98377e-11	0.56649	0.922	0.673	5.67607e-07
Masp1	4.51372e-11	0.774072	0.641	0.238	6.43115e-07
Adssl1	4.9401e-11	0.860579	0.515	0.129	7.03865e-07
Prickle1	5.4179e-11	0.789208	0.786	0.435	7.71943e-07
Alcam	5.51806e-11	-1.5686	0.505	0.782	7.86213e-07
Rps6ka6	5.77407e-11	-1.34904	0.165	0.517	8.2269e-07
Gabbr2	6.23913e-11	0.532094	0.961	0.83	8.88951e-07
Vcan	6.74557e-11	-1.79827	0.146	0.456	9.61109e-07
Ahcyl2	6.74583e-11	0.691957	0.864	0.605	9.61146e-07
Ypel5	6.78359e-11	0.57634	0.961	0.769	9.66525e-07
Net1	7.02415e-11	0.953712	0.612	0.238	1.0008e-06
Arhgap44	7.57805e-11	0.707986	0.845	0.537	1.07972e-06
Ryr3	7.98207e-11	-1.57236	0.592	0.864	1.13728e-06
Scrn1	8.01435e-11	0.513333	0.971	0.864	1.14188e-06
Hap1	9.34309e-11	-1.05633	0.107	0.476	1.3312e-06
Tac1	1.01657e-10	1.83654	0.398	0.082	1.44841e-06
LOC108351137-174229	1.07547e-10	0.587697	1	1	1.53233e-06
Glrb	1.25588e-10	0.655233	0.913	0.714	1.78938e-06
Ascl1	1.26573e-10	-1.46283	0.165	0.517	1.80341e-06
Dek	1.31322e-10	0.68571	0.864	0.585	1.87107e-06
Btbd3	1.3204e-10	0.700636	0.796	0.463	1.88131e-06
Nkiras1	1.39391e-10	0.634497	0.903	0.694	1.98604e-06
Rab3b	1.45313e-10	0.651088	0.796	0.524	2.07042e-06
Esrra	1.61908e-10	0.858863	0.796	0.476	2.30686e-06
AABR07031768.1	1.63277e-10	-1.81869	0.35	0.68	2.32637e-06
LOC363337	1.873e-10	0.626114	0.602	0.19	2.66865e-06
LOC691995	1.89135e-10	-1.53911	0.214	0.517	2.6948e-06
Fam135b	1.93896e-10	0.866994	0.689	0.347	2.76262e-06
Akain1	1.9959e-10	0.938624	0.427	0.075	2.84376e-06
Mindy3	2.32688e-10	0.661479	0.816	0.524	3.31534e-06
Pde4b	2.46593e-10	-1.42045	0.184	0.551	3.51346e-06
Sparcl1	2.48505e-10	0.841297	0.903	0.714	3.54071e-06
Prkcq	2.65039e-10	0.836881	0.359	0.041	3.77628e-06
AABR07011682.1	3.11736e-10	0.828063	0.456	0.082	4.44161e-06
Gda	3.13506e-10	0.672565	0.961	0.932	4.46683e-06
Penk	3.88645e-10	-2.6223	0.029	0.299	5.53741e-06
Klf5	4.21538e-10	0.735526	0.301	0.034	6.00608e-06
Epb41l3	4.37918e-10	0.594984	0.903	0.653	6.23946e-06
Col26a1	4.48318e-10	0.913438	0.553	0.17	6.38764e-06
Fh	4.52053e-10	0.59673	0.961	0.762	6.44085e-06
Kiaa0895l	4.59054e-10	-0.993608	0.437	0.755	6.5406e-06
Scn3b	4.85546e-10	-1.29332	0.282	0.639	6.91806e-06
Osbpl6	5.54565e-10	0.774774	0.65	0.293	7.90144e-06
Pak7	5.74126e-10	-1.20671	0.553	0.803	8.18015e-06
Zcchc12	5.83766e-10	0.982548	0.942	0.837	8.3175e-06
Hsd11b1	6.39068e-10	1.14649	0.408	0.088	9.10544e-06
Cacna2d2	6.41029e-10	0.541894	0.854	0.524	9.13338e-06
Slc30a3	6.51868e-10	0.869097	0.641	0.299	9.28781e-06
Fxyd6	6.96213e-10	-1.57856	0.039	0.313	9.91965e-06
Tpm2	7.35626e-10	0.775155	0.447	0.068	1.04812e-05
Hapln1	8.42288e-10	-1.81588	0.039	0.313	1.20009e-05
Sh3yl1	9.09405e-10	0.861779	0.437	0.082	1.29572e-05
Arap2	1.02626e-09	0.769593	0.398	0.061	1.46222e-05
Frmd5	1.03524e-09	0.70595	0.816	0.531	1.47501e-05
Clstn2	1.10666e-09	0.585329	0.971	0.918	1.57677e-05
Cacnb4	1.19551e-09	0.529792	0.99	0.878	1.70337e-05
Car7	1.21855e-09	0.841683	0.291	0.027	1.73619e-05
Slc24a2	1.2788e-09	0.654049	0.864	0.592	1.82204e-05
Nat8l	1.30324e-09	0.548263	0.981	0.776	1.85686e-05
Naa20	1.31677e-09	0.685022	0.913	0.755	1.87614e-05
Myo5b	1.47639e-09	0.510928	0.709	0.313	2.10355e-05
Tnfaip8l3	1.48977e-09	-1.62001	0.117	0.422	2.12263e-05
Tmem108	1.56698e-09	0.816197	0.728	0.401	2.23264e-05
Sox6	1.67367e-09	0.603338	0.408	0.054	2.38465e-05
Snca	1.81404e-09	-1.17832	0.427	0.782	2.58464e-05
Mtfp1	1.93079e-09	0.508272	0.903	0.612	2.75098e-05
Hrc	1.94824e-09	0.782862	0.243	0.014	2.77585e-05
Slc9a3r2	2.04275e-09	0.619656	0.825	0.524	2.9105e-05
Rgs12	2.56251e-09	-1.69479	0.175	0.49	3.65107e-05
Fstl5	2.7847e-09	-1.1757	0.398	0.782	3.96764e-05
Mpdz	2.9167e-09	-1.31657	0.553	0.81	4.15572e-05
Syt12	3.33005e-09	0.797075	0.689	0.333	4.74465e-05
Lrrc39	3.78348e-09	0.761169	0.359	0.068	5.39071e-05
Pdcd6	3.84874e-09	0.552077	0.932	0.769	5.48369e-05
Mrps28	4.14837e-09	0.511534	0.854	0.565	5.9106e-05
Rassf8	4.55577e-09	0.769679	0.476	0.129	6.49106e-05
Tmem70	4.68566e-09	0.60953	0.864	0.66	6.67614e-05
Ankrd6	4.75595e-09	-1.31449	0.214	0.517	6.77628e-05
Tfrc	4.76623e-09	0.709344	0.913	0.782	6.79092e-05
Acsl6	4.8127e-09	0.529662	0.961	0.864	6.85714e-05
Shroom3	4.81766e-09	0.634319	0.524	0.136	6.8642e-05
AABR07031767.1	4.98729e-09	-0.636849	0.029	0.265	7.10589e-05
Efr3a	5.45769e-09	0.503594	0.903	0.68	7.77612e-05
Lingo1	5.6027e-09	0.707237	0.689	0.381	7.98272e-05
Celf4	6.20885e-09	-0.714017	0.942	0.993	8.84638e-05
Tmem18	6.30422e-09	0.70971	0.806	0.558	8.98225e-05
Klhl40	6.43898e-09	0.670096	0.282	0.034	9.17426e-05
Spry1	6.73825e-09	0.796859	0.476	0.17	9.60066e-05
Cbln2	7.16048e-09	-1.3129	0.01	0.231	0.000102023
Gramd1b	7.81101e-09	0.726383	0.777	0.524	0.000111291
Eif1ad	8.12876e-09	0.597302	0.835	0.592	0.000115819
Gprc5b	9.0202e-09	0.711454	0.68	0.347	0.00012852
Agpat4	9.61778e-09	-0.812867	0.32	0.721	0.000137034
Krt222	1.02451e-08	0.600509	0.786	0.463	0.000145972
LOC683897	1.05438e-08	0.654071	0.786	0.531	0.000150228
Asb13	1.08904e-08	0.687481	0.835	0.565	0.000155166
Nkd2	1.10359e-08	0.768891	0.563	0.245	0.00015724
Tac3	1.11005e-08	-1.46423	0.019	0.231	0.00015816
Crhbp	1.15075e-08	1.2155	0.398	0.054	0.000163959
Mcu	1.2888e-08	0.660717	0.65	0.286	0.000183629
Kcnip4	1.37188e-08	-0.989707	0.534	0.816	0.000195465
Gas7	1.51628e-08	-0.972235	0.641	0.878	0.000216039
Slc9a7	1.55244e-08	0.595341	0.913	0.673	0.000221192
Cacna1e	1.69058e-08	-1.11348	0.184	0.551	0.000240873
Rbms1	1.78702e-08	0.666533	0.65	0.306	0.000254614
Cd164l2	1.89803e-08	0.801411	0.573	0.279	0.000270432
Slc1a1	2.04183e-08	0.536566	0.942	0.769	0.00029092
Abhd12	2.06009e-08	0.501796	0.932	0.748	0.000293522
C4a-Ppt2-Stk19	2.0878e-08	0.6101	0.563	0.19	0.00029747
Tmem41a	2.43188e-08	0.757294	0.718	0.415	0.000346495
Sdcbp	2.56069e-08	0.637951	0.942	0.816	0.000364847
Kcnj2	2.75553e-08	-0.864355	0.029	0.272	0.000392608
Nog	2.78015e-08	0.591877	0.495	0.122	0.000396116
Phf24	3.06705e-08	0.640764	0.408	0.075	0.000436993
Timm8a1	3.13843e-08	0.581239	0.806	0.544	0.000447164
Kcna4	3.16073e-08	-1.10373	0.291	0.646	0.00045034
Pofut2	3.39732e-08	0.572209	0.767	0.531	0.00048405
LOC102553298	3.49285e-08	-1.36986	0.282	0.585	0.000497661
Ptchd4	3.52923e-08	0.868799	0.602	0.32	0.000502845
Rasd1	3.78909e-08	-1.09911	0.097	0.395	0.000539869
Osbpl3	4.22803e-08	0.842847	0.592	0.265	0.00060241
Dipk2a	4.32632e-08	0.572617	0.524	0.184	0.000616414
Slc45a4	4.34474e-08	0.671802	0.689	0.408	0.000619038
Sox2	4.6759e-08	-0.801954	0.913	0.973	0.000666222
Cds1	4.86098e-08	0.636943	0.748	0.503	0.000692592
Cpne7	4.94741e-08	-0.87644	0.039	0.361	0.000704907
Mrpl18	4.99142e-08	0.655925	0.854	0.639	0.000711178
Akap12	5.02124e-08	0.516941	0.951	0.803	0.000715426
AABR07032520.1	5.07204e-08	0.738696	0.505	0.19	0.000722664
Tmem132b	5.08993e-08	-1.08089	0.417	0.673	0.000725214
Gsto1	5.09107e-08	0.501788	0.922	0.762	0.000725375
Slc16a2	5.35e-08	0.618466	0.398	0.088	0.000762268
Nudt5	5.51829e-08	0.607955	0.524	0.197	0.000786246
Kctd8	5.73895e-08	0.509003	0.796	0.544	0.000817685
Tgfbr2	5.80281e-08	0.729954	0.524	0.184	0.000826785
Snph	5.82759e-08	0.513472	0.932	0.741	0.000830314
Gls2	5.91918e-08	0.558968	0.612	0.272	0.000843365
Htr3a	6.10964e-08	-1.19833	0.107	0.354	0.000870501
Scn2b	6.8001e-08	0.576991	0.903	0.667	0.000968879
AABR07068161.1	7.19714e-08	-1.51701	0.155	0.469	0.00102545
Habp4	7.43779e-08	0.521496	0.883	0.68	0.00105974
Stx1a	7.55536e-08	-0.835489	0.33	0.646	0.00107649
Lnx1	8.85395e-08	0.570447	0.816	0.558	0.00126151
Rab3d	8.93536e-08	-0.960997	0.058	0.293	0.00127311
Arid5a	9.15002e-08	0.685288	0.563	0.245	0.0013037
Arpin	9.34294e-08	0.660801	0.379	0.116	0.00133118
Akr1e2	1.00235e-07	0.66917	0.631	0.367	0.00142815
Slc25a5	1.03227e-07	0.516876	0.961	0.898	0.00147077
Mcoln1	1.03571e-07	0.621598	0.68	0.381	0.00147568
Mybpc1	1.0639e-07	0.957602	0.359	0.075	0.00151584
Ctxn2	1.07739e-07	-1.25202	0.049	0.259	0.00153506
Prok2	1.09494e-07	-1.15871	0.175	0.408	0.00156007
Atp1b2	1.16598e-07	-0.981801	0.388	0.633	0.00166129
Lgi3	1.19524e-07	0.596107	0.718	0.429	0.00170297
Sphk1	1.22426e-07	0.638271	0.146	0	0.00174432
Npepo	1.25405e-07	0.590242	0.66	0.367	0.00178676
Itga8	1.27226e-07	0.555987	0.66	0.327	0.00181272
Mrpl42	1.28278e-07	0.550613	0.932	0.803	0.0018277
Specc1	1.31506e-07	0.592391	0.573	0.259	0.00187369
Epdr1	1.32017e-07	0.693315	0.631	0.401	0.00188098
Aifm1	1.3511e-07	0.50542	0.786	0.497	0.00192504
St8sia5	1.36968e-07	0.630716	0.68	0.395	0.00195153
U2-094248	1.38613e-07	0.644736	0.311	0.054	0.00197496
Fam189a2	1.38852e-07	0.664103	0.689	0.388	0.00197836
Map6	1.44647e-07	0.609738	0.874	0.633	0.00206093
AABR07043823.2	1.54643e-07	-0.773871	0.029	0.218	0.00220335
Tnfrsf12a	1.54825e-07	0.580245	0.515	0.177	0.00220595
Hs6st1	1.55545e-07	0.531076	0.932	0.735	0.00221621
Hus1	1.65746e-07	0.685007	0.388	0.075	0.00236155
Galt	1.73631e-07	0.612295	0.505	0.184	0.00247389
Sez6	1.80873e-07	-0.918504	0.816	0.925	0.00257708
Fam210a	1.82202e-07	0.619989	0.699	0.422	0.00259601
Kctd17	1.96408e-07	0.62316	0.738	0.503	0.00279842
Ttyh1	2.05278e-07	-0.878637	0.524	0.803	0.0029248
Ppp1r3c	2.42384e-07	0.58584	0.466	0.136	0.00345348
Me3	2.51199e-07	0.60512	0.485	0.156	0.00357908
Mir124-2	2.58977e-07	0.54816	0.757	0.429	0.00368991
Ccdc184	2.74696e-07	0.730264	0.689	0.476	0.00391387
Slc41a3	3.11183e-07	0.730234	0.602	0.327	0.00443373
Cacng5	3.14269e-07	-0.836757	0.136	0.429	0.0044777
Dock9	3.42212e-07	0.830902	0.447	0.19	0.00487583
Slc30a4	3.63478e-07	0.551489	0.699	0.463	0.00517884
Ybx3	3.81199e-07	0.500465	0.67	0.327	0.00543133
Vwc2	3.87485e-07	0.602378	0.262	0.048	0.00552089
Phyh	4.01077e-07	0.578287	0.67	0.354	0.00571454
AABR07047823.1	4.83742e-07	-1.25373	0.039	0.211	0.00689236
Polr3g	5.02724e-07	0.571332	0.301	0.041	0.00716282
Gch1	5.36417e-07	0.667419	0.728	0.463	0.00764287
Grik1	5.64915e-07	-1.10472	0.709	0.878	0.0080489
Slc35b4	5.7745e-07	0.712177	0.709	0.537	0.0082275
Wipf3	5.80781e-07	0.517547	0.155	0.007	0.00827497
Card19	6.3171e-07	0.502895	0.553	0.272	0.0090006
Plk3	6.34076e-07	0.765574	0.583	0.327	0.00903432
Slc16a6	6.46198e-07	0.828063	0.388	0.102	0.00920704
Brinp2	6.97395e-07	0.625994	0.796	0.565	0.00993649
AABR07033829.1	7.1327e-07	-0.774274	0.524	0.728	0.0101627
Rock1	7.65862e-07	-0.913176	0.883	0.946	0.010912
AABR07043823.1	7.90357e-07	-0.900984	0.029	0.211	0.011261
Slc25a1	7.98881e-07	-0.956253	0.427	0.714	0.0113824
Unc45b	9.23423e-07	0.591018	0.126	0	0.0131569
Sec14l2	9.42946e-07	0.575177	0.466	0.143	0.0134351
Fam126a	1.00331e-06	-0.873905	0.175	0.456	0.0142951
Srxn1	1.02356e-06	0.673638	0.631	0.401	0.0145837
Hrh3	1.02546e-06	0.686267	0.34	0.102	0.0146107
Dtx4	1.03418e-06	-0.867099	0.087	0.293	0.0147349
Rerg	1.1092e-06	-1.03896	0.029	0.238	0.0158039
Piezo2	1.11565e-06	-1.40422	0.058	0.238	0.0158958
Tymp	1.19736e-06	0.502307	0.66	0.354	0.01706
Kcna6	1.20395e-06	0.554806	0.796	0.626	0.0171539
Timp3	1.25053e-06	0.644239	0.456	0.122	0.0178176
Smarca2	1.31566e-06	-0.859168	0.893	0.952	0.0187455
St8sia1	1.31761e-06	0.636606	0.33	0.088	0.0187733
Cartpt	1.36051e-06	0.978521	0.835	0.605	0.0193845
Fgd3	1.3863e-06	0.54872	0.214	0.041	0.019752
LOC100912227	1.40287e-06	-0.701416	1	1	0.0199881
LOC103694355	1.50395e-06	-0.974238	0.252	0.517	0.0214282
Phf20l1	1.50865e-06	-1.13012	0.612	0.776	0.0214953
Cacna2d3	1.52306e-06	-1.05696	0.097	0.306	0.0217006
Atf6	1.53878e-06	0.584678	0.806	0.592	0.0219245
Lmo2	1.5984e-06	0.576783	0.553	0.224	0.0227741
2300009A05Rik-Iqch	1.61417e-06	0.576631	0.709	0.483	0.0229986
Cables2	1.69008e-06	0.706134	0.748	0.544	0.0240802
Pter	1.83506e-06	0.669361	0.175	0.02	0.0261459
Drd1	1.88356e-06	0.596866	0.476	0.17	0.0268369
Lace1	1.94907e-06	0.648829	0.398	0.143	0.0277703
Lacc1	1.99223e-06	0.572113	0.155	0.014	0.0283852
Dusp1	2.14075e-06	0.595776	0.505	0.218	0.0305014
Cacna2d1	2.16499e-06	-1.2995	0.282	0.571	0.0308468
Rgs10	2.22517e-06	-1.03059	0.816	0.871	0.0317042
Acaa2	2.37038e-06	0.52175	0.573	0.299	0.0337732
Fundc2	2.37707e-06	0.640501	0.728	0.531	0.0338685
Gcsh	2.52739e-06	0.523905	0.816	0.68	0.0360103
Epha3	2.85211e-06	-1.32116	0.369	0.639	0.0406368
Gpr176	2.93923e-06	0.561735	0.495	0.272	0.0418781
Ddit3	3.06337e-06	0.50244	0.883	0.714	0.0436468
Spred1	3.30307e-06	0.63244	0.816	0.667	0.0470621
Pou3f4	3.31502e-06	-0.95363	0.097	0.299	0.0472324
LOC100362342	3.41433e-06	0.669819	0.243	0.061	0.0486473
Plxnc1	3.46313e-06	-0.939796	0.417	0.721	0.0493426
Cacnb3	3.53309e-06	-0.724861	0.301	0.578	0.0503395
Fn3krp	3.80716e-06	0.602175	0.534	0.231	0.0542444
Inpp5a	3.8419e-06	0.53151	0.66	0.395	0.0547394
Fgf14	4.00382e-06	-0.776988	0.476	0.741	0.0570464
LOC100912202	4.01076e-06	0.593144	0.417	0.129	0.0571453
Hip1	4.22099e-06	-0.762972	0.971	0.993	0.0601407
Nek7	4.31249e-06	0.58505	0.592	0.32	0.0614443
Grin2a	4.35862e-06	-0.772417	0.379	0.701	0.0621017
Cmc2	4.46213e-06	0.570307	0.806	0.653	0.0635765
Gipc2	4.52583e-06	0.549023	0.34	0.082	0.064484
Fgfr1	4.55237e-06	0.565898	0.291	0.116	0.0648622
Trappc12	4.56031e-06	0.620811	0.738	0.497	0.0649753
Ifi27	4.61997e-06	-1.03639	0.32	0.633	0.0658254
LOC108352150	4.65866e-06	-0.671911	0.019	0.184	0.0663766
Flt3	4.67445e-06	0.526661	0.301	0.061	0.0666015
Exoc8	4.81412e-06	0.573191	0.757	0.476	0.0685915
Tmem129	5.22408e-06	0.566599	0.388	0.116	0.0744327
Cpne5	6.15089e-06	-0.800231	0.049	0.224	0.0876378
Dlc1	6.23391e-06	0.55202	0.398	0.095	0.0888207
Fras1	6.25505e-06	1.14464	0.282	0.075	0.089122
Klf4	6.31738e-06	0.610736	0.233	0.027	0.09001
Trpt1	6.43639e-06	0.555369	0.301	0.075	0.0917057
Fars2	6.87844e-06	0.614238	0.534	0.286	0.098004
Filip1	6.94739e-06	0.609484	0.233	0.02	0.0989864
Pycr1	7.15416e-06	0.611775	0.767	0.619	0.101932
Tp53i11	7.49989e-06	-0.981801	0.019	0.156	0.106858
Plcl1	7.54625e-06	0.561243	0.505	0.211	0.107519
Ildr2	7.55513e-06	-1.19958	0.058	0.272	0.107645
Synm	8.15122e-06	0.541491	0.408	0.088	0.116139
Ints6l	8.27869e-06	0.541603	0.602	0.374	0.117955
LOC103694328	8.41768e-06	0.557232	0.553	0.259	0.119935
Polg	8.78198e-06	0.675474	0.476	0.204	0.125126
Htr1a	8.90117e-06	0.796188	0.398	0.116	0.126824
Ube2l6	9.30259e-06	0.681852	0.165	0.027	0.132543
Taf13	9.43177e-06	0.538842	0.641	0.408	0.134384
Ptprd	9.43304e-06	-0.96053	0.689	0.816	0.134402
Tars1	9.82113e-06	0.516412	0.67	0.422	0.139931
Trib2	1.03177e-05	-0.821542	0.379	0.619	0.147007
Slit3	1.07715e-05	0.57601	0.534	0.299	0.153472
Rgs16	1.08967e-05	-0.690265	0.058	0.245	0.155256
Ankrd9	1.12256e-05	0.564147	0.34	0.095	0.159943
Kit	1.17868e-05	-0.790645	0.738	0.844	0.167939
Tigar	1.22482e-05	0.553979	0.476	0.204	0.174512
Rwdd3	1.27967e-05	0.601929	0.311	0.095	0.182327
Gpr149	1.2824e-05	-1.06538	0.039	0.19	0.182716
Il1rap	1.34376e-05	0.604944	0.699	0.51	0.191458
Nsg2	1.34816e-05	-0.60782	1	1	0.192086
AW209491	1.4098e-05	0.636536	0.456	0.204	0.200868
Pdss2	1.43298e-05	0.520153	0.359	0.116	0.204171
Ajap1	1.44317e-05	-0.893762	0.243	0.469	0.205623
Hmmr	1.48119e-05	0.518701	0.534	0.306	0.21104
Pdzph1	1.49632e-05	-1.02825	0.029	0.17	0.213196
Fxyd7	1.50209e-05	-0.885657	0.049	0.231	0.214018
Rundc3b	1.56838e-05	0.519905	0.505	0.231	0.223463
Snapc5	1.5824e-05	0.672994	0.621	0.401	0.225461
Baalc	1.72468e-05	0.664369	0.621	0.456	0.245732
Fam149a	1.79751e-05	0.551448	0.456	0.197	0.256109
Npas1	1.86016e-05	-1.4758	0.029	0.17	0.265035
Sord	2.21697e-05	0.537563	0.573	0.259	0.315874
Sertm1	2.32143e-05	-0.830648	0.233	0.49	0.330758
LOC365985	2.32367e-05	0.685248	0.485	0.272	0.331077
Mir34a	2.38822e-05	0.51911	0.175	0.014	0.340273
Kif21a	2.40898e-05	-0.707992	0.903	0.939	0.343231
Tent5a	2.42904e-05	0.686403	0.67	0.429	0.346089
Marchf11	2.47898e-05	0.550319	0.417	0.143	0.353205
Gfm2	2.69225e-05	0.578098	0.767	0.585	0.383592
Zc3h6	2.70246e-05	0.530421	0.65	0.422	0.385046
Elavl4	2.78141e-05	-0.766806	0.883	0.939	0.396295
Pnma3	2.87338e-05	-0.798789	0.369	0.626	0.409399
Aplp1	2.89843e-05	-0.53012	0.971	1	0.412968
Wnt5b	3.01857e-05	0.538025	0.146	0.007	0.430085
Atg4b	3.03561e-05	0.605621	0.68	0.483	0.432514
Ldb2	3.21115e-05	-1.11972	0.029	0.19	0.457524
Slc41a1	3.36958e-05	0.538025	0.466	0.252	0.480098
Cog7	3.60601e-05	0.535793	0.534	0.272	0.513784
Timm21	3.83485e-05	0.544686	0.583	0.347	0.546389
Sh2d3c	3.88957e-05	0.53349	0.427	0.163	0.554186
Lrfn5	4.06354e-05	-0.824922	0.223	0.456	0.578973
LOC100912097-001842	4.08838e-05	0.568763	0.417	0.197	0.582512
Vgll4	4.13965e-05	-1.02595	0.165	0.388	0.589818
Nek1	4.14993e-05	0.539512	0.786	0.551	0.591282
Tango6	4.34686e-05	0.579744	0.35	0.129	0.61934
Trmt9b	4.36158e-05	0.51403	0.427	0.15	0.621438
Lrrc55	4.44834e-05	0.567604	0.175	0.034	0.6338
Elfn1	4.62941e-05	-0.560587	0.107	0.286	0.659598
Tbl1x	4.896e-05	-1.02378	0.32	0.497	0.697582
Fgl2	5.31425e-05	-0.966401	0.417	0.578	0.757174
Pcp4	5.36486e-05	-0.673293	0.864	0.912	0.764385
AABR07060487.1	5.4963e-05	-0.854064	0.65	0.789	0.783113
Efnb3	5.69476e-05	-0.914759	0.408	0.612	0.81139
Zfyve9	5.92379e-05	0.544617	0.748	0.571	0.844021
Lingo2	6.15181e-05	-1.03263	0.34	0.517	0.87651
Pgap1	6.2325e-05	-0.879087	0.631	0.776	0.888006
Man1a2	6.52568e-05	0.507275	0.757	0.619	0.929779
Tmed3	7.06688e-05	0.638779	0.641	0.497	1
Samd9	7.12712e-05	-0.943579	0.078	0.224	1
Ecsit	7.64534e-05	0.550764	0.544	0.347	1
Kcnd2	8.06394e-05	-0.764132	0.718	0.884	1
Hdac9	8.09027e-05	-0.711068	0.922	0.966	1
Acly	8.28957e-05	-0.566581	0.942	0.986	1
B3gnt2	8.77841e-05	-0.884408	0.058	0.197	1
Svil	9.12644e-05	-0.860692	0.67	0.816	1
Slc7a3	9.2524e-05	-0.845257	0.447	0.612	1
Plpp6	9.38739e-05	0.643386	0.282	0.109	1
AABR07060833.1	0.000101557	-1.05733	0.583	0.748	1
Pwwp2a	0.000102809	0.525874	0.505	0.272	1
1700030K09Rik	0.000103081	0.571927	0.379	0.122	1
Itga9	0.000105127	0.687425	0.282	0.068	1
Grb14	0.000105361	-0.751642	0.155	0.333	1
Slc46a3	0.000105924	0.581092	0.223	0.034	1
Capns2-Lpcat2	0.000105959	0.500669	0.369	0.116	1
Dzip1	0.000106916	-0.893772	0.816	0.857	1
Rgs8	0.000107769	-1.10427	0.33	0.524	1
L1cam	0.000112254	-0.748581	0.583	0.748	1
Lrp1b	0.000112732	-1.26921	0.767	0.823	1
Serinc4	0.000116615	0.603427	0.301	0.109	1
Dnajc28	0.000125836	0.502172	0.563	0.333	1
Gpr150	0.000126545	-0.663659	0.019	0.129	1
Klhl32	0.000133198	0.531916	0.388	0.15	1
Nnat	0.000149563	-0.82896	0.592	0.748	1
Coro1a	0.000154959	-0.501993	0.379	0.626	1
Zfand2a	0.000162866	0.500285	0.573	0.361	1
Hpcal4	0.000164489	-0.978134	0.107	0.374	1
Dolk	0.000177814	0.567175	0.66	0.537	1
Nfia	0.000195669	-0.949041	0.194	0.408	1
Atxn1	0.000220513	-0.760257	0.534	0.735	1
Arhgap26	0.000221252	0.632958	0.33	0.129	1
Ptbp3	0.000222323	-0.836841	0.107	0.252	1
Lyrm4	0.000234624	0.538337	0.68	0.49	1
Klhl2	0.000235186	-0.844964	0.602	0.755	1
Gabrg3	0.000235257	-0.967955	0.709	0.81	1
Wnt5a	0.000237525	-0.813735	0.019	0.143	1
Luc7l3	0.000239573	-0.59843	0.99	0.993	1
AC141377.1	0.000255779	-0.74008	0.078	0.218	1
Rasl11b	0.000257165	-0.794938	0.214	0.381	1
Prex2	0.000260279	-1.23742	0.165	0.313	1
Gpd2	0.000269604	-0.648977	0.35	0.612	1
Ubash3b	0.000274416	-0.644063	0.699	0.85	1
Tbc1d30	0.000276007	-0.784237	0.175	0.313	1
Cryab	0.00028652	-1.70358	0.049	0.15	1
Marchf4	0.000299815	-0.600592	0.408	0.619	1
Nipsnap3b	0.000318054	-0.655507	0.592	0.762	1
Nrxn3	0.000339154	-0.570267	1	1	1
Cntn4	0.000346247	-1.04121	0.282	0.469	1
Nabp1	0.000351562	0.577076	0.282	0.109	1
Ptger3	0.000369296	-0.92705	0.087	0.224	1
Syt6	0.000371589	-0.72127	0.01	0.122	1
Dok6	0.000373382	-1.09543	0.553	0.721	1
Zdhhc22	0.000391381	0.595139	0.32	0.102	1
Trank1	0.000399231	-0.665258	0.243	0.469	1
Cdk5r1-Rnf135	0.000403787	-0.647635	0.951	0.925	1
S100a10	0.000425926	-1.07179	0.175	0.354	1
Tmem176b	0.000503684	-0.951868	0.087	0.218	1
Ucn	0.000512945	0.791022	0.136	0.014	1
Id4	0.000518622	0.501514	0.184	0.041	1
Farp1	0.000522376	-0.670365	0.379	0.524	1
Lrch2	0.000525266	-1.03291	0.34	0.476	1
Usp46	0.000532078	-0.831223	0.621	0.707	1
Sox11	0.000538981	-0.757862	0.204	0.367	1
Grm8	0.000565338	-0.873362	0.039	0.17	1
Anxa5	0.000572495	-0.728824	0.117	0.252	1
Lix1	0.000572535	-0.611395	0.078	0.231	1
Cacna1g	0.000577966	-1.02466	0.136	0.299	1
Qsox1	0.000581584	0.609379	0.602	0.429	1
Gnai2	0.000625779	-0.697099	0.466	0.639	1
Gltpd2	0.000637858	0.525314	0.641	0.469	1
Prkar2b	0.000642714	-0.625126	0.34	0.51	1
Grin3a	0.000648668	-0.570705	0.019	0.156	1
Maged2	0.00067057	-0.617086	0.709	0.83	1
Jup	0.000676402	-0.589724	0.049	0.177	1
Zfp746	0.000687143	0.503574	0.359	0.17	1
Cxadr	0.000708888	-0.896038	0.757	0.782	1
Tmem50a	0.000708915	-0.623244	0.563	0.741	1
Cemip2	0.000740622	-0.543874	0.184	0.422	1
Pou3f3	0.000746824	-0.748271	0.282	0.415	1
Smim11	0.000793383	0.518329	0.573	0.395	1
Igsf21	0.000799265	-0.731247	0.039	0.156	1
Rgmb	0.000821729	-0.648035	0.738	0.864	1
LOC100912167	0.000830274	-0.747434	0.534	0.667	1
Tpst1	0.00083499	-0.65569	0.709	0.755	1
Ramp2	0.000842044	-0.54141	0.311	0.456	1
Mtss1	0.000881651	-0.551183	0.816	0.912	1
Lsm2	0.000918655	0.502686	0.33	0.143	1
Ccdc146	0.000926129	-0.803077	0.204	0.32	1
Atp8a1	0.000952141	-0.588033	0.553	0.762	1
Flrt3	0.000983146	-0.711818	0.495	0.68	1
AABR07052085.3	0.00107929	-0.785288	0.126	0.238	1
Thra	0.00109273	-0.586772	0.796	0.857	1
Megf11	0.00113816	-0.723273	0.078	0.184	1
Rapgef6	0.00113831	-1.34699	0.398	0.524	1
AABR07052500.1	0.001166	-0.695889	0.417	0.578	1
Dgkb	0.00116901	-0.603553	0.359	0.565	1
Pdxp	0.00121247	-0.609878	0.602	0.748	1
Pid1	0.00122786	-0.88749	0.252	0.381	1
Pabpn1	0.00129441	-0.552757	0.932	0.993	1
Arnt2	0.00142504	-0.638533	0.951	0.959	1
Ap3b1	0.00152101	-0.638967	0.311	0.469	1
Dhx40	0.00155085	-0.775287	0.495	0.626	1
Kcnk13	0.00155337	-0.603884	0.078	0.15	1
U1-223764	0.0015621	-0.99155	0.456	0.619	1
AABR07049085.1	0.00157939	-0.772236	0.019	0.136	1
Crygd	0.00159286	-0.608089	0.019	0.122	1
Snupn	0.00166321	0.601006	0.388	0.224	1
Nedd4l	0.00168197	-0.796274	0.34	0.524	1
Slitrk1	0.00169927	-0.603005	0.913	0.946	1
AABR07064304.1	0.00180124	-0.68686	0.32	0.456	1
Jph4	0.00191624	-0.632352	0.408	0.599	1
Rabgap1l-Gpr52	0.00197006	-0.519059	0.058	0.17	1
Slc8a2	0.00204117	-0.508141	0.107	0.245	1
Epha3-U4	0.0021184	-0.670935	0.311	0.49	1
Trps1	0.0021213	0.505986	0.301	0.136	1
Snrnp70	0.00224998	-0.589814	0.981	0.993	1
Lrrc58	0.00225166	-0.508533	0.825	0.898	1
Arhgap21	0.00225183	-0.77999	0.485	0.633	1
LOC100909405	0.00227496	-0.56989	0.029	0.102	1
Cdk14	0.00231211	-0.613441	0.903	0.891	1
Pafah1b3	0.00239026	-0.739375	0.544	0.68	1
Pnck	0.00253238	-0.780828	0.311	0.469	1
Mlf1	0.00256437	-0.880914	0.204	0.327	1
Magi3	0.00257613	-0.796444	0.408	0.565	1
Tnks	0.00258439	-0.720266	0.67	0.735	1
Ppp1r21	0.0026273	-0.603489	0.456	0.605	1
Gng10	0.00265057	-0.592505	0.66	0.803	1
Ntrk3	0.0026598	-0.745114	0.33	0.551	1
Map4k4	0.00267835	-0.632561	0.544	0.701	1
Tspan17	0.00273531	-0.510142	0.573	0.755	1
Gnb4	0.00277428	-0.668707	0.388	0.51	1
Cspg5	0.00281114	-0.593006	0.796	0.864	1
Cacna1b	0.00283019	-0.818642	0.825	0.85	1
Mllt3	0.00297924	-0.576673	0.485	0.626	1
Trim36	0.00303518	-0.703993	0.126	0.231	1
Nyap2	0.00309242	-0.648925	0.709	0.789	1
Top2b	0.00309839	-0.531985	0.709	0.864	1
Lrrcc1	0.00313129	-0.692504	0.262	0.401	1
Tut4	0.00313842	-0.947741	0.495	0.626	1
Cdkl2	0.00317022	-0.637041	0.495	0.639	1
Nr2f2	0.00322516	-0.58807	0.408	0.585	1
Dmpk	0.00343028	-0.726102	0.233	0.408	1
Ptprj	0.00353316	-0.865448	0.33	0.449	1
Arhgap31	0.00357468	-0.532149	0.029	0.109	1
Scamp1	0.00359567	-0.537826	0.777	0.878	1
Asic1	0.00364684	-0.525239	0.272	0.361	1
AABR07015608.1	0.00377559	-0.50652	0.146	0.259	1
Wsb1	0.00390239	-0.552486	0.612	0.728	1
Chd9	0.00415685	-0.735484	0.786	0.81	1
Suz12	0.00421266	-0.701305	0.553	0.701	1
Celf5	0.00435351	-0.856051	0.592	0.673	1
Eif4e3	0.00438165	-0.764238	0.272	0.395	1
Mapk8	0.00448617	-0.564476	0.767	0.864	1
Dsel	0.00451138	-0.640099	0.175	0.313	1
Phactr3	0.00460958	-0.533902	0.796	0.85	1
Pgrmc1	0.0046776	-0.530996	0.922	0.939	1
Mpp7	0.00487	0.501324	0.165	0.048	1
A830018L16Rik	0.00500605	-0.768512	0.583	0.673	1
Ccdc112	0.00509694	-0.972882	0.262	0.395	1
Ntng1	0.00517583	-0.928051	0.068	0.143	1
Gabrb1	0.00520709	-0.562661	0.466	0.612	1
AABR07049790.1	0.00527159	-0.51729	0.282	0.483	1
Vangl2	0.00530929	-0.625126	0.039	0.116	1
GL.20164	0.00539877	-0.686065	0.184	0.286	1
Prkdc	0.00573952	-0.922934	0.34	0.422	1
Taf1d	0.00581453	-0.522067	0.845	0.898	1
R3hdm1	0.00590081	-0.508451	0.903	0.952	1
Asl	0.00594695	-0.556944	0.301	0.435	1
Hfm1	0.00605594	-0.620978	0.107	0.218	1
AC126572.2	0.0061596	-0.508401	0.087	0.163	1
Tspan2	0.00636018	-0.638742	0.136	0.238	1
Plekhg1	0.00639259	-0.680666	0.068	0.143	1
Pdcd4	0.00652085	-0.637453	0.835	0.891	1
Epb41l4a	0.00660503	-0.60391	0.097	0.19	1
Heatr5a	0.00666337	-0.519765	0.078	0.177	1
Nexmif	0.00692998	-0.527656	0.612	0.728	1
Nudcd1	0.0069312	0.501121	0.447	0.259	1
Nr2e1	0.00693485	-0.549502	0.117	0.184	1
Fads6	0.00713868	0.571271	0.243	0.102	1
LOC102553001	0.00732759	-0.847534	0.155	0.197	1
Grik5	0.00737073	-0.712538	0.728	0.776	1
Nkain2	0.00747606	-0.838923	0.282	0.435	1
Tmem80	0.00768707	-0.574619	0.495	0.646	1
Oxld1	0.00790177	0.50206	0.379	0.238	1
Lxn	0.0079992	-0.650372	0.078	0.17	1
Fam193b	0.00800934	-0.60628	0.563	0.639	1
Hebp1	0.00808352	-0.593163	0.126	0.224	1
Nagk	0.00840605	-0.674405	0.602	0.748	1
Dab1	0.00852779	-0.614641	0.854	0.857	1
Cdh10	0.00873077	-0.967182	0.282	0.401	1
Gipr	0.00874023	-0.582566	0.058	0.129	1
Pbx1	0.0091263	-0.665258	0.388	0.524	1
Rsrp1	0.00926626	-0.518969	0.951	0.959	1
Sh3bgrl	0.0098095	-0.663757	0.718	0.789	1
Pola1	0.00982534	-0.750129	0.107	0.177	1
Hspb6	0.0100081	-0.576069	0.155	0.231	1
D430019H16Rik	0.0100573	-0.548392	0.262	0.381	1
Heg1	0.0102379	-0.582566	0.078	0.136	1
AABR07003935.7	0.0104101	-0.706062	0.311	0.469	1
B3gat1	0.0107548	-0.509819	0.874	0.912	1
Erc2	0.0107977	-0.509438	0.553	0.687	1
Pkn1	0.0111723	-0.649651	0.524	0.626	1
Pnma8a	0.0111793	-0.52127	0.223	0.299	1
Asf1a	0.0113071	-0.582734	0.466	0.565	1
LOC100912195	0.011554	-0.528792	0.971	0.966	1
Tcf12	0.0115935	-0.794998	0.417	0.503	1
Syn2	0.0116576	-0.521938	0.932	0.98	1
Chd1	0.0116712	-0.778124	0.476	0.578	1
Lypd6b	0.0124023	-0.795625	0.029	0.102	1
AABR07052897.2	0.0126129	-0.635423	0.175	0.272	1
Snx4	0.0128344	-0.538314	0.699	0.762	1
Spidr	0.0130511	-0.878575	0.068	0.143	1
Qpct	0.0133921	-0.595978	0.097	0.19	1
Igsf11	0.0134224	-0.891125	0.184	0.245	1
Slc39a14	0.0134486	0.647138	0.485	0.469	1
Gabrd	0.0138864	-0.539736	0.301	0.429	1
4933427D14Rik	0.0140856	-0.508879	0.32	0.456	1
Acaca	0.0142385	-0.621503	0.709	0.762	1
Angpt1	0.0144285	0.519408	0.262	0.143	1
Serf1	0.0144576	-0.510294	0.951	0.959	1
Zfp512b	0.014678	-0.550409	0.515	0.639	1
Castor2	0.0146944	-0.543124	0.796	0.844	1
Adamtsl3	0.0151678	-0.672592	0.223	0.245	1
Itpr1	0.015731	-0.581926	0.417	0.626	1
RGD1559622	0.0170243	-0.688841	0.078	0.156	1
Adpgk	0.0172348	-0.616654	0.466	0.599	1
Nrsn2	0.0172441	-0.725123	0.272	0.333	1
Jak2	0.0176032	-0.517825	0.243	0.388	1
U6-073520	0.0184303	-0.619815	0.039	0.109	1
Taf9b	0.0194488	-0.620361	0.427	0.558	1
Sowahc	0.0195448	-0.560587	0.068	0.15	1
U6-189725	0.0196056	-0.66203	0.107	0.184	1
Xpo1	0.0208137	-0.563613	0.505	0.585	1
Synpo2	0.0208731	-0.777755	0.136	0.19	1
Gstm7	0.0208739	-0.657789	0.515	0.633	1
Flrt1	0.0209297	-0.561938	0.369	0.49	1
Pcdh19	0.02104	-0.680199	0.175	0.224	1
Hmgn3	0.0213055	-0.528033	0.835	0.884	1
Srrm4	0.0215279	-0.590088	0.262	0.327	1
Sema3c	0.0215595	-0.861566	0.068	0.15	1
Nav2	0.0216776	-0.560587	0.447	0.565	1
Ezh2	0.0218377	-0.711694	0.117	0.197	1
Mal2	0.0220242	-0.560587	0.117	0.17	1
Col11a1	0.022056	-0.968518	0.136	0.224	1
Trpv2	0.0226462	-0.550537	0.301	0.374	1
Chrna4	0.0226463	-0.689761	0.078	0.19	1
Ypel2	0.022667	-0.549151	0.369	0.524	1
Hes6	0.0229537	-0.621065	0.66	0.728	1
Pde3a	0.023718	-0.623526	0.466	0.578	1
Sox9	0.0237285	-0.804686	0.097	0.19	1
Lrrk2	0.0250734	-0.625816	0.184	0.265	1
Prpsap2	0.0251268	-0.766797	0.689	0.721	1
Zfp266	0.0255196	-0.569308	0.379	0.497	1
Slc16a7	0.0262532	-0.69543	0.534	0.619	1
Trpm3	0.0269906	-0.628305	0.107	0.211	1
Dpysl3	0.0276343	-0.72202	0.466	0.551	1
Gcat	0.0288735	-0.572958	0.35	0.422	1
Fam172a	0.0288798	-0.518228	0.282	0.388	1
Zscan18	0.0289688	-0.504877	0.301	0.367	1
Pah	0.0290445	-0.563757	0.068	0.136	1
Setd5	0.0298941	-0.543935	0.728	0.789	1
Csrp2	0.0299222	-0.50708	0.049	0.102	1
AABR07021812.1	0.0300906	-0.959334	0.612	0.66	1
Mgll	0.0302177	-0.60656	0.864	0.871	1
Nr3c2	0.0302225	-0.706541	0.107	0.177	1
Rbm6	0.0304357	-0.673135	0.806	0.81	1
Iba57	0.0305716	0.644715	0.136	0.075	1
Cracd	0.030828	-0.52048	0.913	0.946	1
Npas4	0.0315077	-0.510103	0.117	0.163	1
Ankrd13c	0.0328784	-0.790863	0.359	0.415	1
Pitpnm3	0.0330753	-0.622419	0.184	0.259	1
Tspan13	0.0330984	-0.543284	0.971	0.918	1
Mkrn3	0.0339118	-0.518249	0.33	0.442	1
AABR07001942.1	0.0343011	-0.571905	0.087	0.143	1
Pde1a	0.0349435	-0.771482	0.068	0.129	1
Dscam	0.0350956	-0.653809	0.379	0.476	1
Lca5	0.035297	-0.551724	0.107	0.163	1
Shtn1	0.035454	-0.512019	0.796	0.83	1
AABR07034328.1	0.0360081	-0.650989	0.689	0.789	1
Sdc2	0.0360714	-0.689831	0.184	0.259	1
Klhdc8b	0.0369249	-0.665879	0.757	0.796	1
Epn2	0.0370703	-0.50882	0.32	0.415	1
Trim24	0.0373094	-0.515692	0.66	0.707	1
Ddx6	0.0376857	-0.879228	0.456	0.463	1
Tab3	0.038164	-0.559469	0.165	0.272	1
Crmp1	0.0384822	-0.577898	0.971	0.959	1
RGD1566325	0.0392538	-0.80558	0.126	0.15	1
Arglu1	0.0393679	-0.507241	0.835	0.884	1
Hsd17b10	0.0399519	-0.621852	0.66	0.714	1
Hecw1	0.0407723	-0.613902	0.146	0.218	1
Map4k2	0.0410288	-0.59724	0.117	0.197	1
Sfswap	0.0422408	-0.502	0.631	0.707	1
Klhl5	0.0431449	-0.545242	0.175	0.238	1
2020-09-05	0.0438818	-0.526721	0.942	0.925	1
Chsy3	0.0447724	-0.505779	0.049	0.102	1
Ahi1	0.0447858	-0.510419	0.883	0.946	1
Rbm5	0.045127	-0.501541	0.913	0.939	1
AABR07005985.2	0.0452217	-0.596506	0.466	0.592	1
Atad5	0.0467933	-0.787645	0.165	0.184	1
Kif15	0.0468949	-0.729377	0.068	0.109	1
Pomk	0.0475474	-0.885657	0.427	0.476	1
Pwwp3b	0.0482791	-0.652154	0.068	0.156	1
Dennd4a	0.0499688	-0.623532	0.476	0.286	1
U6-188632	0.049996	-0.622949	0.068	0.102	1
Tmem131	0.0502889	-0.564389	0.68	0.701	1
MGC95210	0.0504931	-0.649632	0.087	0.143	1
Med12l	0.0508876	-0.548898	0.437	0.537	1
LOC102551133	0.050941	-0.528708	0.903	0.912	1
AABR07028872.1	0.0519661	-1.0667	0.252	0.306	1
Exosc10	0.0529181	-0.64692	0.456	0.531	1
Gatad2b	0.0545394	-0.791943	0.66	0.707	1
Zfp618	0.0559082	-0.765637	0.165	0.211	1
Prdx4	0.056228	-0.586659	0.233	0.279	1
Ak3	0.0577287	-0.544238	0.67	0.714	1
AABR07001923.1	0.0581149	-0.509294	0.282	0.327	1
Sdc3	0.058168	-0.517869	0.291	0.367	1
Pcdh18	0.0599606	-0.671813	0.165	0.184	1
Zcchc9	0.0604132	-0.576989	0.845	0.837	1
Nav3	0.0621516	-0.705826	0.806	0.816	1
Cdk5rap2	0.0634916	-0.863272	0.204	0.224	1
Amotl2	0.0648081	-0.521056	0.087	0.129	1
Cst6	0.0669071	-0.977309	0.233	0.265	1
Scaper	0.0675958	-0.645105	0.612	0.667	1
AABR07031931.1	0.0679352	-0.875177	0.097	0.116	1
Pclo	0.0693722	-0.548144	0.971	0.986	1
Telo2	0.0694938	-0.501016	0.485	0.544	1
Ccdc141	0.0700018	-0.547342	0.087	0.143	1
Mir384	0.0705015	-0.5316	0.951	0.966	1
Dscaml1	0.0706941	-0.544714	0.437	0.524	1
Dancr	0.0713027	-0.517061	0.272	0.327	1
Galnt14	0.0717518	-0.721987	0.136	0.177	1
Npy1r	0.0732167	-0.524516	0.136	0.211	1
Dact1	0.0735022	-0.658491	0.136	0.15	1
Zdbf2	0.0736057	-0.730678	0.524	0.646	1
Sbf2	0.0739619	-0.678847	0.602	0.66	1
AABR07057765.1	0.0740916	-0.776469	0.33	0.401	1
Sfrp1	0.0747002	-0.505435	0.117	0.177	1
Nebl	0.0762568	-0.503083	0.447	0.231	1
Neb	0.078119	-0.532702	0.107	0.15	1
U6-085096	0.0848651	-0.626044	0.078	0.116	1
Pitpnm2	0.0862608	-0.515239	0.592	0.673	1
Ddx3	0.0921012	-0.534887	0.33	0.422	1
7SK-Sugct	0.0927548	-0.538865	0.107	0.109	1
Agbl4-Bend5	0.0948202	-0.504675	0.214	0.286	1
Zc3h11a	0.0959648	-0.52526	0.816	0.81	1
Egfr	0.0966269	-0.514294	0.058	0.116	1
Eml5	0.0975296	-0.622707	0.66	0.714	1
Tnk2	0.0986333	-0.50621	0.641	0.626	1
Nrip1	0.0986897	-0.585413	0.233	0.252	1
Snw1	0.100001	-0.638919	0.408	0.483	1
Cep250	0.101859	-0.679976	0.272	0.347	1
Ift140	0.101954	-0.74396	0.485	0.537	1
Atm	0.102004	-0.687457	0.301	0.34	1
LOC100359574	0.102404	-0.529111	0.204	0.238	1
Gigyf2-250011	0.103119	-0.521322	0.66	0.694	1
Ube2z	0.107441	-0.637334	0.155	0.197	1
Trmt10b	0.108263	-0.542805	0.456	0.456	1
Pigb	0.108529	-0.570066	0.107	0.163	1
Cd2ap	0.109534	-0.610088	0.369	0.476	1
Pde1c	0.109934	-0.744939	0.126	0.15	1
B3galt2	0.111496	-0.555082	0.408	0.449	1
Nkain3	0.111628	-0.522268	0.058	0.102	1
Fam71d	0.112598	-0.666536	0.058	0.116	1
Fv1	0.118636	-0.553332	0.583	0.646	1
Akap8l	0.121933	-0.590546	0.864	0.844	1
Fam111a	0.12199	-0.901833	0.214	0.238	1
AABR07010706.1-MetazoaSRP	0.1225	-0.526686	0.068	0.102	1
Nr3c1	0.123344	-0.501747	0.243	0.313	1
Gas5	0.125997	-0.505779	0.854	0.823	1
Cdk17	0.12799	-0.502653	0.563	0.578	1
AABR07019403.1	0.128667	-0.570583	0.32	0.381	1
Psme4	0.128901	-0.621589	0.825	0.83	1
Zeb2	0.129936	-0.532331	0.961	0.905	1
Rnf145	0.130451	-0.578606	0.456	0.497	1
Cdc25b	0.133915	-0.597323	0.204	0.231	1
Slf1	0.135845	-0.61416	0.466	0.497	1
AABR07064299.1	0.137374	-0.51757	0.136	0.177	1
Xrn1	0.138576	-0.617463	0.553	0.565	1
Rad17	0.142966	-0.522791	0.388	0.429	1
Tent2	0.144812	-0.774092	0.32	0.313	1
Ttc28	0.14774	-0.58039	0.32	0.347	1
Arl13b	0.147892	-0.72136	0.515	0.517	1
Golga7b	0.148992	-0.756734	0.67	0.701	1
Ccnt2	0.150485	-0.685559	0.699	0.748	1
Hivep1	0.155835	-0.70676	0.505	0.503	1
Plch2	0.158192	-0.787804	0.136	0.19	1
Lasp1	0.15828	-0.520922	0.388	0.374	1
Galnt7	0.159255	-0.707402	0.223	0.231	1
Unc5d	0.161512	-0.605482	0.485	0.517	1
Unc79	0.166272	-0.542888	0.544	0.551	1
Itgb8	0.170096	-0.864799	0.126	0.129	1
Fbrsl1	0.174328	-0.574894	0.592	0.626	1
AABR07019253.1	0.17716	-0.523364	0.534	0.585	1
Ptpn9	0.179656	-0.609108	0.65	0.646	1
Trhde	0.181409	-0.896243	0.252	0.231	1
Nmral1	0.186152	-0.505188	0.175	0.19	1
Mib2	0.188587	-0.586904	0.65	0.673	1
AABR07057798.1	0.190265	-0.612387	0.146	0.156	1
Luc7l2	0.193263	-0.606777	0.816	0.789	1
Zcchc7	0.19584	-0.64935	0.951	0.898	1
Mast2	0.204537	-0.580774	0.689	0.721	1
Pycr3	0.204753	-0.521392	0.447	0.49	1
Frmd3	0.219514	-0.521293	0.223	0.238	1
Sycp2	0.220446	-0.57018	0.146	0.17	1
Rps6ka3	0.221754	-0.799957	0.476	0.517	1
Zfp692	0.224684	-0.537939	0.398	0.449	1
Pycr2	0.225696	-0.540719	0.33	0.374	1
Mir344g	0.226725	-0.501569	0.505	0.565	1
Ccdc191	0.233491	-0.763143	0.262	0.265	1
Mms19	0.237015	-0.792136	0.32	0.32	1
Rxfp1	0.242112	-0.618918	0.369	0.354	1
Cast	0.247551	-0.50803	0.301	0.327	1
Dop1b	0.251922	-0.59535	0.495	0.483	1
P3h3	0.254755	-0.556473	0.534	0.544	1
Snapc3	0.26251	-0.525442	0.767	0.755	1
AABR07060481.1	0.262947	-0.507343	0.117	0.116	1
Ercc6	0.263921	-0.63952	0.456	0.449	1
Cradd	0.265285	-0.696964	0.223	0.204	1
D10Wsu102e	0.265483	-0.511668	0.447	0.442	1
Lin7a	0.269319	-0.504187	0.117	0.129	1
Ice2	0.271244	-0.775394	0.204	0.218	1
Slc1a2	0.275079	-0.515506	0.641	0.646	1
Fads1	0.275666	-0.509108	0.437	0.463	1
AABR07024908.1	0.27622	-0.555167	0.34	0.299	1
Asxl3	0.278476	-0.848269	0.282	0.238	1
Vof16-Lnc215	0.279233	-0.775319	0.563	0.571	1
Cep162	0.27928	-0.561877	0.146	0.143	1
Uhrf2	0.28271	-0.607771	0.592	0.585	1
Usp42	0.289205	-0.773911	0.505	0.531	1
C330007P06Rik	0.293207	-0.525248	0.476	0.293	1
Nek4	0.293675	-0.519283	0.214	0.197	1
Macf1-LOC100361083	0.295658	-0.516887	0.136	0.15	1
Pik3c2a	0.295827	-0.709493	0.544	0.544	1
Cep95	0.305609	-0.633245	0.369	0.422	1
Cdh8	0.310612	-0.533072	0.553	0.585	1
AABR07051207.1	0.313772	-0.514584	0.117	0.109	1
Baz1b	0.320878	-0.684694	0.767	0.762	1
Hpgds	0.321583	-0.775699	0.146	0.129	1
AABR07058169.1	0.334144	-0.590892	0.252	0.211	1
Olr352	0.337491	-0.599808	0.097	0.102	1
Wtap	0.339206	-0.503551	0.883	0.871	1
Ift46	0.340576	-0.519415	0.417	0.408	1
Rras2	0.346765	-0.693125	0.223	0.156	1
LOC100912071	0.348031	-0.505179	0.398	0.388	1
Brpf1	0.353568	-0.530635	0.223	0.109	1
Mlh1	0.353672	-0.500069	0.311	0.299	1
Snx24	0.355812	-0.5321	0.35	0.184	1
Mogat1	0.360122	-0.894956	0.175	0.136	1
Ppp3cc	0.373491	-0.517715	0.67	0.626	1
Rfx3	0.375838	-0.712779	0.117	0.109	1
Lmf2	0.380234	-0.720283	0.175	0.177	1
Nt5dc1	0.381424	-0.788114	0.204	0.177	1
Tp53	0.387531	-0.503429	0.214	0.211	1
Slc16a4	0.389155	-0.644598	0.204	0.156	1
Ubp1	0.389384	-0.517537	0.515	0.531	1
Hecw2	0.395549	-0.556402	0.563	0.565	1
AABR07003933.1	0.398922	-0.660042	0.175	0.204	1
Kdm2b	0.39899	-0.543602	0.204	0.211	1
Parp8	0.413083	-0.510074	0.573	0.585	1
Tmem67	0.413935	-0.553455	0.311	0.177	1
Col28a1	0.419962	-0.635278	0.126	0.041	1
Med23	0.428142	-0.522668	0.204	0.177	1
Atl3	0.450337	-0.550366	0.379	0.388	1
Grm7	0.461153	-0.530418	0.282	0.313	1
Mettl17	0.470273	-0.570593	0.252	0.218	1
Kpna5	0.478206	-0.500615	0.476	0.347	1
Rlf	0.489672	-0.684425	0.495	0.435	1
Zfp608	0.493929	-0.53968	0.495	0.463	1
Cenpk	0.535967	-0.580005	0.194	0.184	1
Zfp182	0.565517	-0.56272	0.369	0.374	1
Dnah9	0.578275	-0.51878	0.214	0.129	1
Khdrbs2	0.585655	-0.726908	0.33	0.381	1
Asxl2	0.587296	-0.522945	0.485	0.456	1
Pitpnb	0.592401	-0.527746	0.796	0.694	1
Zfp606	0.598463	-0.521972	0.359	0.327	1
Zfand6-U6	0.636624	-0.513334	0.282	0.184	1
Iqsec2	0.692433	-0.552473	0.243	0.259	1
Gpatch8	0.69425	-0.509294	0.883	0.823	1
Adal	0.70394	-0.560587	0.243	0.197	1
Zfp592	0.719536	-0.614492	0.417	0.299	1
Vps13a	0.732806	-0.552555	0.777	0.66	1
Hltf	0.743825	-0.593377	0.466	0.429	1
Polq	0.747534	-0.535269	0.107	0.102	1
GL.23586	0.755618	-0.5316	0.117	0.048	1
Zfp292	0.760832	-0.632386	0.796	0.741	1
Dnah12	0.768565	-0.646021	0.155	0.082	1
Jmy	0.776709	-0.622072	0.233	0.15	1
Gorab	0.811752	-0.540473	0.252	0.197	1
L3mbtl3	0.827417	-0.547697	0.194	0.156	1
Tnik	0.860055	-0.506758	0.621	0.537	1
Mepe	0.873232	-0.92402	0.583	0.469	1
Nfatc3	0.877704	-0.842068	0.437	0.327	1
Mfhas1	0.880314	-0.529335	0.369	0.259	1
Xrcc4	0.880819	-0.65404	0.214	0.17	1
Zfp418	0.893402	-0.55802	0.243	0.129	1
Cept1	0.899257	-0.507111	0.553	0.503	1
Bmt2	0.918852	-0.579825	0.728	0.667	1
Trim23	0.934306	-0.509815	0.515	0.463	1
Mbd5	0.943134	-0.732519	0.408	0.327	1
Mettl14	0.95519	-0.659527	0.388	0.293	1
Cnot2	0.986827	-0.594239	0.641	0.592	1
Rnls	0.989803	-0.563915	0.311	0.238	1
Rimbp2	0.996398	-0.504137	0.893	0.769	1
Abracl	0.996507	-0.697987	0.495	0.463	1

## Sheet: Dendrites_GABA1_vs_GABA2-3
Gene_Name	p-value	Avg_logFC	pct.GABAergic_1	pct.GABAergic_2&3	adj_p-value
Atp2b2	8.79921e-07	1.95269	0.528	0.167	0.00260281
Gpr88	2.38283e-05	1.32176	0.472	0.083	0.0704841
Ndufa6	4.0545e-05	1.27254	0.611	0.333	0.119932
Tmsb10	8.30047e-05	-0.801469	0.861	0.979	0.245528
Cort	9.76336e-05	1.12481	0.528	0.125	0.2888
Cacna1a	0.000126325	0.606136	0.222	0	0.373668
Atp5mf-Zfp394	0.00021008	0.887303	0.889	0.667	0.621417
Rps16	0.00023247	0.799528	0.806	0.458	0.687647
Sst	0.000269516	0.87693	0.472	0.125	0.797229
Mrps26	0.000361576	1.31432	0.194	0	1
Cnr1	0.000478706	-1.61774	0	0.208	1
Poldip2	0.000525861	1.13206	0.222	0.021	1
Ptms	0.000533394	0.699417	0.361	0.083	1
Rims1	0.000648796	1.03598	0.5	0.208	1
Mcrs1	0.00102098	0.785929	0.167	0	1
Flywch1	0.00102098	0.760286	0.167	0	1
Dpcd	0.00103438	1.28561	0.417	0.146	1
Dlgap1	0.00109599	1.19824	0.361	0.083	1
Psd	0.00134433	0.502793	0.25	0.042	1
Psmd12	0.00156879	0.644357	0.194	0.021	1
Babam2	0.00160005	0.89526	0.639	0.396	1
Ank3	0.00167476	1.2394	0.361	0.083	1
Got1	0.00171795	0.755279	0.25	0.062	1
Pthlh	0.0019269	1.25567	0.194	0.021	1
Unc119b	0.00196621	-0.838329	0	0.167	1
Bnip3	0.00196621	-0.57145	0	0.167	1
Cacng2	0.0019827	0.699662	0.25	0.042	1
Rtn2	0.00228299	0.661196	0.306	0.062	1
Ttc3	0.002473	0.726643	0.806	0.604	1
Epha4	0.00285436	1.14387	0.139	0	1
Eef1akmt1	0.00285436	0.679161	0.139	0	1
Limch1	0.00285436	0.679161	0.139	0	1
Wiz	0.00285436	0.893818	0.139	0	1
Setd3	0.00285436	1.04145	0.139	0	1
Ndufa5	0.00309908	0.609533	0.889	0.625	1
LOC252890-Cox7c	0.00325112	0.50833	0.972	0.896	1
Ccni	0.00344216	1.26934	0.583	0.333	1
Trak2	0.0038798	0.882389	0.333	0.104	1
Zdhhc21	0.00398807	0.672528	0.167	0.021	1
Pebp1	0.00426622	0.652523	0.833	0.729	1
Uqcc2-148830	0.00438367	0.893818	0.306	0.104	1
Gnb2	0.00460695	-0.618027	0.056	0.25	1
Crtac1	0.00480154	1.2537	0.222	0.042	1
Mrpl42	0.00607126	0.942214	0.278	0.042	1
Cartpt	0.00621842	1.00478	0.472	0.167	1
Ndel1	0.00652475	0.745107	0.167	0.021	1
Amz2	0.00729322	0.7945	0.194	0.042	1
Syt4	0.00779914	0.575364	0.194	0.021	1
Smim29	0.00781113	1.14247	0.25	0.083	1
Tax1bp1	0.00794117	0.81093	0.111	0	1
Gid4	0.00794117	0.559616	0.111	0	1
Zfyve9	0.00794117	0.559616	0.111	0	1
Pdcd6	0.00794117	0.693147	0.111	0	1
Mzt2b	0.00794117	0.760286	0.111	0	1
Celf1	0.00794117	0.760286	0.111	0	1
Phb2	0.00794117	0.543615	0.111	0	1
Ift20	0.00825508	0.96313	0.25	0.062	1
Armcx2	0.00830483	0.626657	0.278	0.083	1
Gap43	0.00849722	-1.3619	0.25	0.5	1
Reep2	0.00864964	0.672528	0.139	0.021	1
Nit1	0.00879377	0.830889	0.361	0.125	1
LOC499584	0.00903312	0.634878	0.194	0.042	1
Tmem160	0.00921284	0.961961	0.417	0.146	1
Minos1	0.0106311	0.743279	0.583	0.292	1
Lgi2	0.0109098	1.4608	0.667	0.438	1
Snx10	0.0109427	1.31126	0.389	0.208	1
Rfng	0.0109491	0.949739	0.139	0.021	1
Sdr39u1	0.0116594	1.15988	0.167	0.042	1
Selenot	0.0117331	0.533517	0.25	0.021	1
Rab11a	0.0117338	1.00774	0.167	0.021	1
Plxdc2	0.012451	0.640503	0.194	0.021	1
Bnc1-Hdgfl3	0.0128136	-0.928713	0.083	0.208	1
Ndufaf8	0.0128601	0.836248	0.167	0.021	1
Strbp	0.012892	0.787334	0.222	0.083	1
Rgs2	0.013293	1.05369	0.306	0.083	1
Polr2k	0.0137802	0.731175	0.444	0.188	1
Nf1	0.0141105	0.91765	0.139	0.021	1
Hpf1	0.0142208	0.885519	0.194	0.062	1
Lsm5-173559	0.0151096	0.599118	0.167	0.021	1
Cdh13	0.0157339	-0.628609	0	0.104	1
Wdfy1	0.0157339	-0.559616	0	0.104	1
AABR07052500.1	0.0157339	-0.54764	0	0.104	1
Gaa	0.0157339	-0.54764	0	0.104	1
Psmd14	0.0157339	-0.606136	0	0.104	1
Serp1	0.0157339	-0.559616	0	0.104	1
Eif2s3	0.0157339	-0.559616	0	0.104	1
Gigyf2-250012	0.0157339	-0.661398	0	0.104	1
Zranb2	0.0157339	-0.661398	0	0.104	1
Dhx29	0.0157339	-1.06327	0	0.104	1
Sumo3	0.0157339	-0.980829	0	0.104	1
Zfand3	0.0157339	-0.899484	0	0.104	1
Nme1	0.0160442	0.593064	0.417	0.188	1
Tp53inp2	0.0168555	1.02677	0.444	0.271	1
Dtna	0.0180132	0.60785	0.167	0.021	1
Trappc2l	0.0181589	0.615255	0.444	0.208	1
Coa3	0.0187884	1.3141	0.25	0.083	1
Phlda1	0.0188711	0.79493	0.194	0.021	1
Arpc3	0.0189392	0.615589	0.25	0.062	1
Gria3	0.0195372	0.624154	0.139	0.021	1
Hspd1	0.0202549	0.527508	0.361	0.146	1
Dctn6	0.0209789	-1.26519	0.083	0.167	1
Rbfox1	0.0210018	0.841567	0.139	0.042	1
Timm22	0.0210379	0.858227	0.139	0.021	1
Rspry1	0.0214381	0.858939	0.194	0.042	1
Impa1	0.0214459	0.699662	0.139	0.021	1
Mrpl12	0.0215989	0.910513	0.389	0.25	1
Add2-Tprkb	0.0218233	0.575364	0.222	0.042	1
Xkr4	0.0225611	1.01068	0.278	0.146	1
LOC102555659	0.0225657	-2.13269	0.056	0.167	1
Tpm3	0.0234855	-1.3947	0.028	0.125	1
Psmd4	0.0236498	0.739667	0.167	0.042	1
Cystm1	0.0237979	0.703842	0.417	0.188	1
Serf1	0.0243581	0.662376	0.333	0.167	1
Strn3	0.0253428	0.911149	0.139	0.042	1
Cplx2	0.0262337	-0.610481	0.222	0.458	1
Ube2n	0.0263084	0.595167	0.139	0.021	1
Igfbp3	0.0263488	1.15427	0.25	0.104	1
Ndufa9	0.0268681	1.41669	0.194	0.062	1
Mrpl48	0.0273166	0.766172	0.361	0.104	1
Cnih1	0.0274425	0.60785	0.139	0.021	1
Ndufa2	0.0278947	0.655863	0.778	0.646	1
Zfp24	0.0288452	0.600554	0.111	0.021	1
Sdf4	0.0292976	0.632523	0.139	0.021	1
Snx27	0.0296474	0.664492	0.167	0.021	1
Ss18l2	0.0298887	1.29717	0.333	0.125	1
Parp6	0.0302813	0.559616	0.25	0.062	1
Ppp2r5c	0.0304701	0.902868	0.222	0.062	1
Mtch2	0.0308685	0.503391	0.194	0.042	1
Ptp4a2	0.0318093	0.651806	0.333	0.104	1
Cox20	0.0323719	0.600057	0.167	0.042	1
AABR07006258.2	0.0327974	0.736231	0.167	0.083	1
Rps19bp1	0.0332519	0.84999	0.139	0.042	1
Pc	0.0336264	0.584934	0.167	0.062	1
Dennd5a	0.034248	0.905709	0.222	0.083	1
Pten	0.0347667	0.639658	0.222	0.083	1
Rimkla	0.0351494	0.755279	0.139	0.021	1
Ndufaf1	0.0357067	0.570249	0.111	0.021	1
Krtcap2	0.0362941	0.926341	0.167	0.021	1
Ndufb11	0.0368147	0.846719	0.528	0.312	1
Thy1	0.0368924	0.940709	0.361	0.188	1
Eif2b5	0.0369287	-0.846332	0.028	0.125	1
Cops5	0.0373438	0.575364	0.194	0.062	1
Serf2	0.037432	1.10908	0.556	0.417	1
Psmb4	0.0378988	0.568584	0.306	0.146	1
Pabpc1	0.0391212	1.26224	0.389	0.208	1
Clstn3	0.0391896	0.719464	0.111	0.021	1
Kif5a	0.0391971	-1.31758	0.417	0.479	1
Guk1	0.0397783	0.870405	0.5	0.292	1
Slc5a6	0.0402951	-1.13016	0.056	0.146	1
Atp6v1h	0.0408242	-0.679902	0.056	0.146	1
Zdhhc2	0.0409571	0.510826	0.194	0.062	1
LOC288913	0.0412061	0.666479	0.333	0.146	1
Necab2	0.041853	0.807558	0.222	0.042	1
Tbc1d9	0.0425503	0.716678	0.194	0.062	1
Tll1	0.0426042	1.0878	0.194	0.042	1
Naa38	0.0426313	0.797165	0.528	0.188	1
Ttll7	0.0427624	1.16315	0.306	0.125	1
Ppm1l	0.0429274	0.685365	0.194	0.021	1
Kcna2	0.0429809	0.647338	0.25	0.125	1
Map1lc3a	0.0435591	0.534542	0.556	0.375	1
Wbp2	0.0447754	-1.09218	0.083	0.146	1
Nsf	0.0450383	0.845028	0.222	0.062	1
Slirp	0.0454174	0.816207	0.139	0.042	1
Hdac5	0.0454221	0.845391	0.25	0.125	1
Fbxw11	0.0461063	-0.70657	0.028	0.125	1
Ndufa13	0.0467735	-0.966685	0.472	0.542	1
Adcy1	0.0473918	1.08369	0.194	0.062	1
Akt1	0.0476562	0.661196	0.139	0.062	1
Ercc6l2	0.0479606	0.609766	0.111	0.021	1
Ctnnd2	0.0481418	0.642375	0.306	0.083	1
Acsl6	0.0482272	0.609766	0.111	0.021	1
Atp2b1	0.0490287	0.555277	0.306	0.125	1
Cert1	0.0491428	0.547193	0.194	0.062	1
Scand1	0.0493689	0.558997	0.333	0.125	1
Atrx	0.0504959	0.60134	0.139	0.042	1
Erlec1	0.0505258	1.39903	0.306	0.125	1
Tmem38a	0.0511278	0.7945	0.111	0.021	1
Tmed2	0.0512906	-0.926762	0.028	0.125	1
Emc4	0.0516859	1.10488	0.139	0.083	1
Panx2	0.0525997	0.559616	0.194	0.042	1
Ccser2	0.0529998	1.41845	0.111	0.021	1
Gtf2h5	0.053442	0.871014	0.361	0.188	1
Lyrm1	0.0540199	-0.764839	0.028	0.104	1
Tmem229b	0.0544049	0.737207	0.222	0.083	1
Atf4	0.0547623	0.724533	0.417	0.25	1
Zeb2	0.0562764	-0.536085	0.028	0.167	1
Kif1b	0.0566916	-1.1087	0.333	0.354	1
Dnajc19	0.0568624	0.741003	0.222	0.062	1
Tut7	0.0568718	0.798508	0.111	0.021	1
Tcaf1	0.059986	0.830006	0.111	0.042	1
Ldhal6b-Tmem242	0.0603181	0.551497	0.139	0.021	1
Sumo1	0.0617151	-0.970358	0.222	0.292	1
Nova1	0.062165	-0.548566	0.056	0.146	1
Rpl27a-002131	0.0622315	-0.551177	0.278	0.375	1
Cdk5r1-Rnf135	0.0622859	-1.31758	0.056	0.188	1
Mvb12b	0.0630012	-0.61226	0.028	0.104	1
Tmem234	0.0630077	-0.905421	0.028	0.104	1
Serpini1	0.0631405	0.536898	0.139	0.042	1
Rapgef1	0.0638836	0.575364	0.139	0.021	1
Rtn1	0.0651084	-0.546544	0.444	0.667	1
Pum2	0.0672821	0.520014	0.194	0.062	1
Ost4	0.0695452	0.930114	0.333	0.188	1
Maf1	0.0699733	-0.520241	0.028	0.104	1
AC095947.1	0.070542	0.711353	0.472	0.333	1
Cd81	0.0707573	0.609766	0.111	0.042	1
Eef2	0.0710731	0.778088	0.583	0.5	1
Pclo	0.0717953	-0.552447	0.139	0.271	1
Psmc5	0.0721579	0.674099	0.111	0.021	1
Pkig	0.0722463	0.877645	0.111	0.021	1
Mt1-Mt3-Mt2A	0.0726034	0.747214	0.5	0.479	1
Cdc42bpa	0.0726677	0.593064	0.25	0.125	1
Ghitm	0.0742918	0.618246	0.306	0.208	1
Stk25	0.0749769	0.526093	0.139	0.042	1
AC141489.1	0.075276	-0.796644	0.5	0.604	1
Kcmf1	0.0762905	0.604594	0.139	0.062	1
Fam91a1	0.0764488	0.594056	0.111	0.042	1
Chd5	0.0774751	-0.652325	0.111	0.229	1
Gipc1	0.077995	0.570808	0.139	0.062	1
Gpi	0.0786744	-0.740313	0.139	0.188	1
Reln	0.0787657	-0.563094	0.028	0.146	1
Rnf139-Ndufb9	0.0792543	0.524071	0.861	0.792	1
Rpl35	0.0797572	0.618777	0.75	0.708	1
Gad2	0.0800687	-0.620576	0.556	0.625	1
Thoc7	0.0808542	0.860685	0.111	0.021	1
Rbm8a	0.0825584	0.507045	0.111	0.042	1
Kcnip4	0.0832772	-0.923408	0.083	0.167	1
Pik3ca	0.0836173	1.37582	0.25	0.104	1
Nme3	0.0842539	-1.09234	0.083	0.125	1
Vps41	0.0849072	0.861284	0.167	0.062	1
Ypel3	0.0869433	0.51474	0.111	0.021	1
Tsc22d3	0.0899243	0.742744	0.167	0.062	1
Ckb	0.0902073	0.913271	0.528	0.438	1
Bzw2	0.0904255	0.507311	0.139	0.042	1
Mras	0.0913316	0.795426	0.167	0.042	1
Mgst3	0.091433	0.6856	0.5	0.396	1
Tmem183a	0.0915652	0.528319	0.306	0.104	1
Cerk	0.0937728	0.508989	0.278	0.125	1
Fbxo44-Fbxo6	0.0937985	0.91251	0.139	0.083	1
Git1	0.0938486	0.554561	0.278	0.104	1
Sirt3	0.093859	1.56323	0.139	0.062	1
Dusp3	0.0941896	0.769934	0.222	0.125	1
Nipsnap1	0.094547	-1.08181	0.056	0.125	1
Serbp1	0.0945688	0.566853	0.167	0.083	1
AABR07041972.1	0.0957194	-0.835623	0.056	0.125	1
Elovl4	0.0961562	0.942363	0.111	0.021	1
Vta1	0.0981902	0.712565	0.111	0.021	1
Lin7b	0.0989429	1.16449	0.139	0.062	1
Cdk16	0.0989758	0.516868	0.167	0.062	1
Sh3bgrl	0.0993853	-0.799165	0.028	0.146	1
Atp2a2	0.100188	0.755668	0.167	0.104	1
Pycr1	0.100569	-1.39774	0.028	0.104	1
Zfr	0.100623	0.639658	0.194	0.062	1
Got2	0.100867	-1.10818	0.194	0.229	1
Ecpas	0.101231	0.795426	0.194	0.125	1
Stmn2	0.101452	-1.00226	0.694	0.75	1
Auh	0.10313	0.974315	0.222	0.083	1
Gnptg	0.106342	-0.885038	0.028	0.104	1
Nnat	0.106505	-0.637024	0.361	0.479	1
Mapk9	0.107005	-0.925341	0.083	0.146	1
Ncdn	0.107632	0.640961	0.194	0.125	1
Gria1	0.108938	0.61123	0.361	0.188	1
Mcrip2	0.110256	1.07294	0.111	0.021	1
Zbtb4	0.110809	0.575364	0.111	0.021	1
Map7d2	0.111024	-0.932485	0.111	0.167	1
Celf4	0.111736	-0.675492	0.056	0.167	1
Enho	0.112107	0.636635	0.194	0.083	1
Bri3bp	0.112531	1.25049	0.167	0.083	1
Hmgcs1	0.113384	1.27009	0.222	0.146	1
Esf1-156685	0.113986	0.693147	0.111	0.021	1
Rufy3	0.115608	0.852777	0.333	0.146	1
Calm2-073484	0.116588	0.543615	0.417	0.271	1
Ube2o	0.117021	1.1815	0.111	0.021	1
Bad	0.119323	-0.875469	0.028	0.104	1
Sec11c	0.119787	0.546426	0.361	0.208	1
Dad1	0.120382	0.739667	0.167	0.083	1
Fez1	0.120456	-0.532864	0.25	0.375	1
Gria2	0.121446	-0.830635	0.222	0.333	1
Cbx5	0.121455	-0.95885	0.083	0.188	1
Lrpap1	0.123411	0.611082	0.139	0.062	1
Cfap36	0.124207	0.660086	0.194	0.062	1
Ankrd13b	0.126049	0.844874	0.111	0.021	1
Srp9	0.126608	0.918954	0.194	0.104	1
Phactr1	0.128031	-1.12897	0.167	0.25	1
Rbx1	0.133868	0.782159	0.389	0.292	1
Map4	0.135285	-0.912895	0.194	0.292	1
Ufc1	0.137712	0.871935	0.139	0.042	1
Slc6a8	0.140163	-0.85745	0.056	0.125	1
Ccdc88a	0.142989	-1.04217	0.028	0.104	1
Med21	0.143447	0.965562	0.111	0.042	1
Prdx2	0.143715	0.630371	0.611	0.583	1
Ctnnb1	0.144255	-0.513096	0.139	0.188	1
Vps28	0.144344	0.562119	0.111	0.062	1
Ndufv3-148199	0.145523	-0.81093	0.278	0.354	1
Ddx25	0.146216	-1.45945	0.056	0.125	1
GL.12850	0.148333	-0.852777	0.028	0.104	1
AABR07017145.2	0.148436	-0.984374	0.111	0.188	1
Fam32a	0.148791	-0.937493	0.083	0.125	1
Glrx5	0.149887	0.74444	0.222	0.125	1
Btaf1	0.151595	-0.599621	0.139	0.271	1
Ptdss2	0.154298	0.673345	0.222	0.083	1
Sdha	0.156362	-0.976915	0.111	0.188	1
Adgrl1	0.157405	-0.824175	0.083	0.188	1
Aes	0.15876	0.917548	0.333	0.167	1
Morf4l2	0.158958	-1.19298	0.194	0.208	1
Lancl1	0.159686	0.524683	0.194	0.083	1
Cdip1	0.162334	1.40982	0.25	0.104	1
Ccdc124	0.163608	-0.65938	0.083	0.208	1
Sec61a1	0.169137	-0.70557	0.056	0.104	1
Ndufs4	0.16971	-0.723919	0.111	0.188	1
6430548M08Rik	0.171662	-0.517169	0.083	0.167	1
Cope	0.171671	-0.550046	0.111	0.167	1
Napa	0.172579	-0.573457	0.056	0.104	1
Ubfd1	0.172999	0.954627	0.111	0.104	1
Gnas-Gnas	0.175266	-0.906426	0.889	0.833	1
LOC100912227	0.175579	0.709446	0.5	0.375	1
Gcsh	0.17593	0.521297	0.139	0.062	1
Ddah1	0.178415	-1.04085	0.083	0.167	1
Idh3a	0.179731	0.715126	0.167	0.104	1
Lamtor2	0.183044	0.578267	0.361	0.208	1
Nat8l	0.185132	1.13095	0.194	0.104	1
Bloc1s1	0.186457	0.581754	0.333	0.229	1
Gnaq	0.186736	0.638231	0.222	0.125	1
Snrnp27	0.188511	-0.855382	0.167	0.167	1
Ndufc1	0.188607	0.578301	0.639	0.542	1
Ncs1	0.190092	0.552963	0.306	0.167	1
Syn1	0.19148	-0.776144	0.056	0.104	1
Ppp3cb	0.19172	0.738268	0.222	0.104	1
Xpo6	0.191902	-0.696267	0.056	0.104	1
Slc25a11	0.192986	-0.660357	0.083	0.188	1
Wdr26	0.19406	-1.39786	0.056	0.104	1
Ppp1ca	0.195452	-0.532465	0.028	0.125	1
Zfp106	0.195904	-0.735707	0.306	0.083	1
Ap2s1	0.196379	0.604019	0.333	0.229	1
Ppm1h	0.198605	-0.889095	0.083	0.146	1
Abhd17b	0.199109	-0.577315	0.028	0.125	1
Csdc2	0.20038	0.780159	0.139	0.083	1
Cnrip1	0.200949	1.37269	0.194	0.104	1
Tmx4	0.208137	0.507311	0.139	0.042	1
Wdr1	0.208389	0.834226	0.111	0.062	1
Glg1	0.208732	-0.889262	0.056	0.125	1
Atxn7l3b	0.208944	-0.907633	0.333	0.396	1
Tsc2	0.210416	0.712195	0.194	0.083	1
Ndufb7	0.212597	0.592171	0.583	0.583	1
Cbx1	0.21519	0.743158	0.111	0.042	1
Nefm	0.215974	-0.878753	0.361	0.458	1
Ndrg4	0.218336	0.542574	0.472	0.375	1
Oxa1l	0.220873	-0.846521	0.083	0.146	1
Nrcam	0.221408	0.526574	0.139	0.083	1
Hcn1	0.222309	-0.707252	0.111	0.125	1
Clec16a	0.222411	0.616186	0.111	0.062	1
Fabp5	0.223554	0.609614	0.5	0.479	1
Uqcrc2	0.225283	0.750813	0.194	0.125	1
Dlg2	0.228209	0.528844	0.194	0.104	1
Rac1	0.229358	-0.633043	0.056	0.104	1
Dnajc8	0.229834	1.10866	0.139	0.083	1
Ndufs3-Ptpmt1	0.230771	-0.868387	0.139	0.188	1
Ndfip1	0.233214	-0.728957	0.139	0.208	1
Srpk2	0.234543	0.714561	0.167	0.125	1
Cetn2	0.234783	-0.678506	0.083	0.125	1
Scd2	0.235516	0.745791	0.139	0.083	1
Etf1	0.236439	-0.671575	0.083	0.104	1
Borcs7	0.236992	0.931697	0.167	0.062	1
Asph	0.237428	0.681974	0.111	0.021	1
Pip5k1c	0.24156	-0.563689	0.222	0.25	1
Dtd1	0.248606	-0.71784	0.083	0.104	1
Mrpl15	0.249173	-0.514664	0.083	0.146	1
Dynlt3	0.251268	-0.684179	0.056	0.104	1
Smdt1	0.251835	-0.612529	0.444	0.583	1
Mtmr3	0.252943	0.861028	0.111	0.042	1
Nrxn3	0.253514	-0.760499	0.194	0.188	1
Mapk1	0.254252	-0.729705	0.139	0.167	1
Mlf2	0.255745	0.510826	0.278	0.125	1
Hnrnpu	0.255798	0.505684	0.222	0.125	1
Rab6a	0.25649	-0.548236	0.389	0.479	1
Slc30a9	0.259967	0.833068	0.25	0.125	1
Mycbp2	0.260755	0.508225	0.139	0.042	1
Rabep1	0.266434	-0.595334	0.139	0.167	1
Tspyl4	0.270745	-0.584157	0.25	0.292	1
Map1b	0.270841	-0.632988	0.778	0.854	1
Scg2	0.270969	-0.71784	0.167	0.188	1
Taldo1	0.271361	-0.525266	0.139	0.208	1
Satb1	0.272468	0.575364	0.222	0.125	1
Arl8a	0.2726	-0.956642	0.194	0.167	1
Syn2	0.276559	-0.729252	0.111	0.146	1
Dipk1b	0.277991	0.644357	0.139	0.062	1
Paxx	0.279866	-1.29229	0.167	0.167	1
Pet100	0.280038	-1.39518	0.111	0.104	1
Scn3a	0.282034	-0.619039	0.083	0.104	1
Apbb1	0.285928	0.719464	0.25	0.208	1
Glrx2	0.291242	1.25363	0.222	0.167	1
Usp29	0.293308	-0.892943	0.056	0.104	1
Atp6v1g1-Tmem268	0.293539	-0.670046	0.278	0.312	1
Gpm6a	0.303545	-0.597543	0.167	0.25	1
Srsf2	0.304122	-0.587787	0.028	0.104	1
Btbd3	0.305094	-0.984499	0.056	0.125	1
Ldhb	0.305367	-0.609377	0.306	0.375	1
Ubac1	0.308261	-0.752519	0.111	0.125	1
Dpm2	0.308437	0.510826	0.167	0.125	1
Scg5	0.309615	-1.04395	0.083	0.104	1
Fam171b	0.311882	-0.834461	0.083	0.104	1
Cnbp	0.314541	-0.556288	0.083	0.104	1
Spag9	0.316124	-0.882389	0.111	0.146	1
Dgkd	0.323453	0.909602	0.139	0.104	1
Kcnq3	0.325541	-0.551177	0.167	0.208	1
Cyp3a2-Arpc1a	0.32727	-0.551177	0.111	0.146	1
Sox2	0.333747	-1.00953	0.083	0.104	1
Fam20b	0.335535	0.845284	0.167	0.125	1
Spcs2	0.335945	-0.6765	0.083	0.125	1
Uqcrfs1	0.337127	-0.74841	0.278	0.292	1
Clec2l	0.337375	0.879047	0.278	0.167	1
Mrpl23	0.340058	-0.690484	0.083	0.104	1
Psmg3	0.340092	-0.6765	0.111	0.125	1
Mef2a	0.343087	-0.590868	0.139	0.188	1
Ctnnbip1	0.344336	-0.876888	0.083	0.104	1
Actr1a	0.345204	0.99709	0.111	0.083	1
Sdcbp	0.347228	-0.858397	0.083	0.104	1
Mrpl34	0.34771	0.702626	0.167	0.083	1
Serinc1	0.349637	0.5511	0.111	0.062	1
Tmcc2	0.350774	0.973449	0.139	0.104	1
Mrps23	0.351174	0.845163	0.111	0.062	1
Hspa4l	0.353544	-0.780853	0.111	0.104	1
Sem1	0.35667	-0.57581	0.417	0.292	1
Eno1	0.358729	-0.541597	0.167	0.167	1
Calm2-207032	0.359276	-0.935634	0.444	0.5	1
Senp6	0.36116	-0.847298	0.083	0.104	1
Cacybp	0.369949	-0.559616	0.111	0.146	1
Tomm20	0.372412	-0.995359	0.306	0.062	1
Mest	0.380871	-0.637267	0.083	0.104	1
Cdipt	0.383319	0.626284	0.111	0.062	1
Sucla2	0.384751	0.555946	0.389	0.25	1
Ubl3	0.38947	0.807166	0.167	0.104	1
Map2k2	0.392739	-0.778979	0.139	0.167	1
Nefl	0.394772	-0.573884	0.472	0.521	1
Rab3gap2	0.398891	-1.01325	0.111	0.125	1
Pam16	0.399215	-0.613683	0.194	0.188	1
Dynll2	0.401782	-0.7404	0.417	0.438	1
Arpc2	0.402237	-0.628609	0.139	0.104	1
Ube3a	0.402896	-0.695861	0.083	0.125	1
Npm1	0.404309	-0.638087	0.083	0.125	1
Alkbh7	0.407706	-0.584513	0.111	0.125	1
Cycs	0.409959	0.507542	0.139	0.083	1
Tuba1b	0.413031	-0.524586	0.583	0.625	1
1110065P20Rik	0.413227	-0.576613	0.167	0.062	1
Rundc3a	0.413964	0.807558	0.278	0.167	1
Psmb3	0.419491	-0.633043	0.111	0.104	1
Rps21	0.422854	-0.506561	0.194	0.188	1
Sdhd	0.434577	0.689395	0.194	0.125	1
Galnt13	0.436006	-0.652706	0.111	0.083	1
Lsm12	0.437554	0.502092	0.194	0.146	1
LOC100911769	0.437774	0.718465	0.333	0.292	1
Uhrf1bp1l	0.438094	0.602175	0.139	0.083	1
Cpe	0.43848	-0.780716	0.167	0.146	1
Ensa	0.444101	-0.582396	0.306	0.333	1
Zfp318	0.453733	-0.521425	0.083	0.104	1
Limk1	0.464517	-1.17194	0.167	0.125	1
Eif4g2	0.465817	0.575364	0.25	0.208	1
Epm2aip1	0.468245	-1.33281	0.139	0.125	1
Prepl	0.471122	0.560723	0.139	0.104	1
Hypk	0.473509	-0.550046	0.222	0.208	1
Pitpnm1	0.477233	-1.01637	0.083	0.104	1
Pitpna	0.489159	-0.878488	0.194	0.167	1
Tango2	0.494018	0.693147	0.111	0.062	1
Abr	0.49794	-0.5738	0.111	0.125	1
Ube2k	0.512439	-0.545751	0.167	0.167	1
Pcdh9	0.51661	0.683391	0.139	0.104	1
Pdhb	0.527966	0.986908	0.167	0.083	1
Pafah1b2	0.535982	-0.601376	0.222	0.062	1
Abcf1	0.542246	-0.579818	0.111	0.125	1
Mmd	0.542299	-0.655821	0.194	0.146	1
Cbx6	0.542799	0.609885	0.306	0.292	1
Pnpla8	0.545334	-0.595509	0.278	0.125	1
Cfdp1	0.546544	-0.500775	0.139	0.146	1
Sec62	0.547457	0.605136	0.167	0.146	1
Hsp90b1-AABR07056495.1	0.548822	-0.645416	0.139	0.104	1
Fam213b	0.55051	0.788938	0.111	0.083	1
Mllt11	0.554534	-0.585258	0.389	0.271	1
Immt	0.559522	-0.728239	0.139	0.104	1
Fnbp1l	0.560174	-0.540198	0.111	0.104	1
2020-09-11	0.563047	-0.704246	0.139	0.125	1
Rc3h2	0.566646	-1.05538	0.139	0.062	1
Pak1	0.573616	-0.642793	0.139	0.104	1
Atp6v1b2	0.574156	-0.666479	0.333	0.375	1
Bhlhb9-Gprasp1	0.574709	-0.728239	0.139	0.125	1
Tcf4	0.576575	-0.63504	0.556	0.542	1
Rab14	0.592712	-0.711558	0.361	0.188	1
Pmvk	0.595705	-0.994299	0.167	0.188	1
Slc6a1	0.596679	-0.786238	0.222	0.208	1
Fkbp8	0.598815	-0.688591	0.167	0.125	1
Chchd10	0.607425	0.603802	0.222	0.25	1
Traf3	0.610159	-1.01785	0.111	0.083	1
Psmb5-AC109100.1	0.611419	-1.21073	0.139	0.146	1
Atp6v0d1-Agrp	0.63007	-0.733969	0.444	0.292	1
Cst3	0.637815	-0.57402	0.333	0.354	1
Ppig	0.645859	-0.778669	0.139	0.062	1
Mis12	0.647114	0.583948	0.083	0.104	1
Rsf1	0.647185	-0.537637	0.111	0.062	1
Cab39	0.654771	-0.939105	0.111	0.125	1
Clpb	0.66206	-0.815037	0.167	0.104	1
Nap1l5	0.676964	-0.51977	0.361	0.333	1
H3f3b	0.677432	-1.19915	0.111	0.083	1
Rab3a	0.688317	-0.591877	0.444	0.438	1
Lrrc73	0.692944	-0.998529	0.139	0.104	1
Dld	0.696773	-0.701231	0.167	0.146	1
Iqsec3	0.699938	-0.551648	0.111	0.083	1
Mrps18a	0.705475	-0.862602	0.167	0.104	1
Nsmf	0.72391	-0.508649	0.278	0.229	1
Prkcz	0.726435	-0.94177	0.139	0.083	1
Tubb2a	0.743526	-0.683267	0.389	0.25	1
Rnf214	0.744846	-0.661398	0.25	0.167	1
AABR07010706.1-MetazoaSRP	0.748548	0.517545	0.167	0.208	1
Ndufa10l1	0.754826	0.575364	0.083	0.146	1
Dzip1	0.756515	-0.875469	0.167	0.167	1
Crmp1	0.768171	0.927719	0.056	0.104	1
Prkce	0.776773	-0.628609	0.111	0.125	1
Rnaseh2a	0.781064	-0.895671	0.139	0.042	1
Nomo1	0.786955	-0.628609	0.111	0.083	1
Pcdh11x	0.794571	-0.687316	0.333	0.167	1
Nedd4	0.802849	-0.538152	0.222	0.104	1
Trappc1	0.805394	-0.530628	0.139	0.083	1
Rpl34	0.816301	-0.547739	0.389	0.396	1
Calm3	0.832791	-0.652642	0.778	0.771	1
Atp6v1e1	0.83552	-0.539575	0.333	0.312	1
Csde1	0.839773	-0.670943	0.139	0.083	1
Cyc1	0.840726	-0.631829	0.333	0.25	1
Cmpk1	0.841326	-0.77319	0.194	0.125	1
Gmps	0.847404	-0.765468	0.111	0.083	1
Chd3	0.855518	-0.638087	0.333	0.188	1
Chchd6	0.859815	-1.12834	0.139	0.062	1
Ezh2	0.86807	-0.770439	0.111	0.062	1
Fbxo10.2	0.86979	-0.590387	0.222	0.25	1
Ube2l3	0.869802	-0.997516	0.222	0.188	1
Dynlrb1	0.870027	-0.602558	0.528	0.562	1
Pigp	0.879178	-0.693147	0.139	0.062	1
Cd320-Ndufa7	0.879723	-0.781188	0.528	0.396	1
Mrpl17	0.904413	-0.648695	0.278	0.167	1
Nacc2	0.905148	-0.573259	0.167	0.083	1
Lage3-Ubl4a	0.908941	-0.591114	0.306	0.229	1
Med1	0.910921	-1.10818	0.111	0.042	1
Ppp2r1a	0.916263	0.654232	0.222	0.167	1
Atp6v1g2-RT1-CE14	0.918918	-0.640503	0.222	0.208	1
Tmod2	0.919327	-0.653538	0.222	0.188	1
Sdhb	0.921833	-0.662007	0.222	0.104	1
Mapk8ip2	0.92816	-1.53856	0.167	0.042	1
Canx	0.929008	-1.03524	0.139	0.104	1
Becn1	0.933755	-1.12069	0.139	0.083	1
Atp6v1d	0.934902	-0.965081	0.306	0.188	1
Ddb1	0.93826	-0.678332	0.139	0.083	1
Snrpd2	0.941998	-0.510826	0.194	0.125	1
Eif1	0.948387	-0.654361	0.278	0.208	1
Mcts1	0.949586	0.573483	0.111	0.167	1
Pfkm	0.949845	0.626456	0.056	0.104	1
Cracd	0.960271	-0.552447	0.278	0.188	1
Zmat3	0.960531	-0.597003	0.167	0.146	1
Ssu72	0.971529	-0.684636	0.167	0.104	1
Cltc	0.972827	-0.621174	0.361	0.271	1
Ap1s2	0.98554	-0.688591	0.139	0.083	1

## Sheet: Somata_GABA2_vs_GABA3
Gene_Name	p-value	Avg_logFC	pct.GABAergic2	pct.GABAergic3	adj_p-value
Cnr1	1.96584e-32	-2.2969	0.683	1	2.80092e-28
Adarb2-094873	2.24889e-18	-2.45972	0.207	0.8	3.20422e-14
Sst	3.80186e-17	2.43245	0.89	0.277	5.41689e-13
Fgl2	8.87467e-16	-2.05704	0.402	0.8	1.26446e-11
Cck	2.88951e-15	-2.34154	0.415	0.815	4.11698e-11
Cxcl14	5.3253e-15	-1.24606	0.085	0.723	7.58748e-11
Adarb2-094878	6.93712e-15	-2.30087	0.207	0.708	9.88401e-11
LOC102553298	1.3933e-14	-1.89452	0.427	0.785	1.98517e-10
Nxph1	7.04098e-13	1.72592	0.951	0.585	1.0032e-08
Cplx2	7.51333e-13	-0.911854	0.976	1	1.0705e-08
Tac3	3.86273e-12	-2.05688	0.024	0.492	5.50362e-08
Kcnd3	2.06876e-11	-1.01142	0.866	0.954	2.94757e-07
Ccdc146	6.11051e-11	-1.54717	0.11	0.585	8.70625e-07
Pcp4	9.07379e-11	-0.52996	0.841	1	1.29283e-06
Vstm2a	1.48109e-10	-0.722538	0.866	0.985	2.11025e-06
AABR07064304.1	3.57237e-10	-1.05651	0.22	0.754	5.08991e-06
Sez6l	5.10765e-10	-0.994771	0.671	0.877	7.27738e-06
Alcam	8.94163e-10	-1.21237	0.707	0.877	1.274e-05
Cdh13	1.02221e-09	1.18891	0.829	0.354	1.45644e-05
Rasl11b	1.15776e-09	-1.27576	0.207	0.6	1.64958e-05
Gch1	1.72956e-09	1.2828	0.671	0.2	2.46427e-05
Egfem1	2.16063e-09	-1.18141	0.573	0.877	3.07847e-05
Mepe	2.71263e-09	-1.97646	0.354	0.615	3.86495e-05
Arl6ip1	3.2321e-09	-0.665756	0.963	1	4.60509e-05
AABR07031768.1	7.76113e-09	-1.06329	0.585	0.8	0.000110581
Dlx1	7.7862e-09	-1.02545	0.683	0.877	0.000110938
Ptprt	1.97365e-08	1.54842	0.756	0.323	0.000281206
Rgs16	2.87426e-08	-0.925479	0.061	0.477	0.000409524
Creg1	2.97657e-08	-1.13343	0.732	0.862	0.000424102
Hpse	3.1487e-08	-0.883109	0.439	0.769	0.000448627
Epha3-U4	4.16266e-08	-1.1128	0.305	0.723	0.000593095
LOC102552810	6.51998e-08	1.54001	0.598	0.2	0.000928967
Slc30a3	7.12147e-08	1.11898	0.476	0.077	0.00101467
Tnks	1.13494e-07	-0.868753	0.622	0.877	0.00161706
Cbln2	1.34174e-07	-1.24883	0.061	0.446	0.00191172
Kcnc2	1.72843e-07	1.03141	0.939	0.569	0.00246266
G0s2	2.0797e-07	-1.58794	0.012	0.323	0.00296315
Adcyap1r1	2.49024e-07	-0.832124	0.488	0.8	0.00354809
Rgs8	2.61022e-07	-1.20404	0.427	0.646	0.00371905
Ajap1	2.79788e-07	-1.13112	0.317	0.662	0.00398642
Mpdz	2.95091e-07	-0.96762	0.732	0.908	0.00420446
Hebp1	3.58641e-07	-1.20495	0.085	0.4	0.00510992
Vav2	3.73941e-07	-1.03231	0.061	0.385	0.00532792
Zfp804a	3.79823e-07	1.29054	0.72	0.292	0.00541172
Sncg	6.59434e-07	-1.15349	0	0.215	0.00939562
Rasgrf2	9.65561e-07	-1.2853	0.72	0.785	0.0137573
Magi1	1.11227e-06	-0.877009	0.598	0.8	0.0158476
Rps6ka5	1.43511e-06	1.55468	0.695	0.308	0.0204474
Sparcl1	1.73989e-06	-1.03865	0.646	0.8	0.0247899
Atp2b3	1.90808e-06	-0.744731	0.829	0.923	0.0271863
Sh3gl3	1.95246e-06	-0.90249	0.366	0.662	0.0278186
Zfp128	2.08044e-06	-0.992023	0.085	0.415	0.029642
Vcan	2.36975e-06	-1.07625	0.317	0.631	0.0337642
Sez6	2.42498e-06	-0.621396	0.89	0.969	0.0345512
Celf6	2.59543e-06	-0.64705	0.341	0.723	0.0369797
Gabrg3	3.18226e-06	-0.801242	0.744	0.892	0.0453409
Ryr3	3.38112e-06	-0.852361	0.793	0.954	0.0481741
Wnt7b	4.14981e-06	-0.81215	0.037	0.323	0.0591265
Ncald	4.70464e-06	0.834882	0.902	0.6	0.0670317
Prok2	4.73648e-06	-1.17648	0.268	0.585	0.0674854
Rerg	5.03417e-06	-1.05004	0.098	0.415	0.0717268
Kcnmb2	5.08343e-06	0.938776	0.561	0.154	0.0724287
Ttc17	5.38452e-06	-0.944113	0.573	0.785	0.0767186
Mir101a	5.60115e-06	-0.919648	0.037	0.277	0.0798052
Ldb2	5.93514e-06	-0.830988	0.061	0.354	0.0845639
Phlda1	6.10514e-06	1.03858	0.72	0.338	0.0869861
Ndufa13	6.30384e-06	-0.549308	1	1	0.0898171
Ptprm	7.00345e-06	-1.04875	0.317	0.585	0.0997852
Ubash3b	7.79984e-06	-0.694303	0.793	0.923	0.111132
Golim4	8.0469e-06	-0.644616	0.488	0.738	0.114652
Slc2a13	8.63819e-06	-0.8306	0.829	0.908	0.123077
Sparc	9.02821e-06	0.980147	0.585	0.138	0.128634
Adcy1	9.09129e-06	1.04063	0.805	0.477	0.129533
Vgf	1.07121e-05	0.754674	0.939	0.831	0.152626
Mapk11	1.11631e-05	-0.68693	0.22	0.554	0.159051
Tmem176a	1.25025e-05	-0.629634	0	0.169	0.178135
Tp53i11	1.31171e-05	-1.33094	0.049	0.292	0.186892
Wapl	1.40226e-05	-1.31507	0.512	0.677	0.199794
Slc24a2	1.59935e-05	1.24905	0.732	0.415	0.227876
Nav3	1.80906e-05	-0.959125	0.793	0.846	0.257755
Wif1	1.90479e-05	1.18638	0.598	0.277	0.271394
Mchr1	1.92594e-05	-0.842456	0.293	0.6	0.274409
Zmynd8	1.97103e-05	-0.5882	0.744	0.862	0.280832
Tob1	2.13188e-05	-0.662288	0.146	0.462	0.30375
Stn1	2.16326e-05	-0.647367	0.378	0.615	0.308221
Opcml-236228	2.22518e-05	-0.868994	0.78	0.862	0.317043
Ifi27	2.34344e-05	-0.770312	0.549	0.738	0.333893
AABR07072748.2	2.40685e-05	-0.541305	1	1	0.342928
Usp46	2.75589e-05	-0.714225	0.646	0.785	0.392659
Phf20l1	2.76495e-05	-0.735306	0.707	0.862	0.393951
Cacng5	2.78048e-05	-0.822964	0.317	0.569	0.396162
Ankrd6	2.89795e-05	-0.680209	0.378	0.692	0.4129
Slco5a1	3.04862e-05	-0.766789	0.012	0.246	0.434368
Kcnj3	3.09619e-05	-0.860652	0.488	0.708	0.441146
Chsy3	3.24586e-05	-1.04963	0.012	0.215	0.46247
Hs6st2	3.52298e-05	-0.580773	0.524	0.708	0.501954
Cort	3.91069e-05	1.09127	0.622	0.262	0.557195
Coro2b	3.92437e-05	-0.87527	0.451	0.631	0.559144
Fam126a	4.04862e-05	-0.554973	0.293	0.662	0.576847
Cacna1a	4.4186e-05	0.529722	0.988	0.769	0.629562
Col26a1	4.79063e-05	0.883902	0.28	0.031	0.682569
Kctd15	4.80421e-05	-0.793627	0.012	0.2	0.684504
Vsnl1	5.19772e-05	0.800797	0.927	0.6	0.740571
Sars2	5.29237e-05	-0.652835	0.049	0.246	0.754057
Agbl4-Bend5	5.49278e-05	-0.502978	0.134	0.477	0.782611
Kctd16	5.96974e-05	-0.720429	0.037	0.246	0.850568
Arhgap29	5.97284e-05	-0.81215	0.037	0.308	0.85101
Phip	6.00875e-05	-0.744914	0.744	0.846	0.856127
Ibsp	6.02473e-05	-0.898398	0.073	0.338	0.858404
Stk32c	6.08499e-05	-0.602458	0.098	0.338	0.866989
Pcdh19	6.12806e-05	-1.13696	0.11	0.369	0.873126
Mlf1	6.36962e-05	-0.726525	0.183	0.508	0.907543
Pls3	6.60374e-05	-0.509924	0.72	0.862	0.940901
Myt1l	6.64397e-05	-0.707981	0.829	0.877	0.946634
Ppm1l	6.88244e-05	0.923657	0.915	0.815	0.98061
Hap1	7.30657e-05	-0.647772	0.341	0.646	1
Negr1	7.73318e-05	0.937739	0.622	0.323	1
Hs3st5	7.80279e-05	0.941004	0.5	0.2	1
Hspb6	7.86785e-05	-0.830563	0.11	0.385	1
AABR07052085.3	7.94612e-05	-0.830461	0.11	0.4	1
Ccnl2	8.62983e-05	-1.10251	0.561	0.692	1
Rgs12	8.63891e-05	-0.940201	0.378	0.631	1
Ajm1	9.84206e-05	-0.966301	0.207	0.431	1
Arhgap31	0.00010021	-0.954467	0.037	0.2	1
Mpped1	0.000104916	1.10761	0.549	0.262	1
Carmil1	0.00010503	-0.658416	0.293	0.585	1
Dancr	0.000105977	-0.990018	0.207	0.477	1
Hipk2	0.000108633	-0.661292	0.866	0.892	1
Bcl11b	0.000108878	0.96132	0.683	0.323	1
Htr3a	0.00011026	-0.574461	0.183	0.569	1
Nectin1	0.00011393	0.726804	0.78	0.477	1
AABR07007032.1	0.000115052	-0.779556	0.512	0.677	1
Foxg1	0.000116361	-0.538576	0.561	0.754	1
Stx16	0.000123185	-0.788121	0.268	0.523	1
Myo1e	0.000124483	0.563999	0.244	0.046	1
Tmem178a	0.000131661	0.785448	0.659	0.308	1
Bhlhe40	0.000133431	-0.835157	0.085	0.338	1
Fxyd7	0.00013832	-0.970547	0.122	0.369	1
Satb1	0.000140239	0.946884	0.732	0.415	1
Anxa5	0.000147829	-0.851891	0.134	0.4	1
Zfp385d	0.000150826	0.786762	0.963	0.8	1
Haus7	0.000162633	-0.965325	0.098	0.354	1
2020-03-02	0.000186686	-1.02383	0.317	0.523	1
Cntnap5c	0.000190844	-0.66027	0.427	0.646	1
Nrip3	0.000201616	-0.699983	0.915	0.923	1
Galntl6	0.000201663	1.01716	0.695	0.385	1
Chl1	0.000205963	0.633984	0.988	0.908	1
Ece2	0.000206512	-0.743158	0.415	0.6	1
Elfn1	0.000209626	-0.586766	0.159	0.446	1
Pik3r3	0.000209806	-0.837722	0.451	0.631	1
Mcur1	0.000212292	-0.624191	0.122	0.431	1
Notch1	0.000221308	-0.507744	0	0.123	1
Fut11	0.000221308	-0.613104	0	0.123	1
Gabra5	0.000227583	-0.868753	0.329	0.462	1
Tmem176b	0.000233975	-0.934063	0.122	0.338	1
Lix1	0.000237837	-0.830169	0.11	0.385	1
Wnt5a	0.000254146	-1.11103	0.061	0.246	1
Ostf1	0.000254158	-0.781931	0.024	0.185	1
Matk	0.000264117	-0.741076	0.707	0.846	1
Cadps	0.000266314	-0.593125	0.793	0.877	1
Wscd1	0.000273997	-0.768214	0.524	0.6	1
AABR07043823.2	0.000274569	-0.756187	0.11	0.354	1
AABR07019253.1	0.000286796	0.837216	0.732	0.4	1
Celf2	0.000298609	0.666627	0.988	0.938	1
Kansl3	0.00030192	-0.658806	0.622	0.754	1
Acsl1	0.000303086	-0.52553	0.622	0.785	1
Cryga	0.000306723	-0.680969	0.183	0.462	1
Ap3b1	0.00030836	-0.832167	0.366	0.6	1
Slc35g2	0.000317835	-0.675135	0.659	0.8	1
Rnf31	0.000332171	-0.899368	0.024	0.215	1
Lin7b	0.000332347	0.86628	0.817	0.477	1
Zcchc7	0.000337352	-0.988014	0.902	0.892	1
Ebf4	0.000338932	-0.606545	0.329	0.523	1
Cemip2	0.000357851	-0.665968	0.317	0.554	1
AABR07043823.1	0.00036822	-0.629101	0.085	0.369	1
Slit2	0.000368237	0.713406	0.427	0.138	1
Gpr12	0.000372008	-0.933778	0.146	0.385	1
Fgf1	0.000375591	-0.572009	0.012	0.2	1
Rpl10a-148169	0.000375633	0.59656	0.78	0.585	1
Deptor	0.000376393	-0.956634	0.207	0.415	1
Grid2	0.000379702	-1.02268	0.402	0.569	1
Sgcb	0.000385408	-0.643431	0.439	0.6	1
Tmem200a	0.000419635	-0.587366	0.049	0.308	1
Stx2	0.000428347	-0.621084	0.341	0.615	1
LOC103694321	0.000428377	-0.585397	0.061	0.323	1
P4ha3	0.000440739	-0.637797	0.073	0.308	1
Pipox	0.000450669	-0.837372	0.012	0.138	1
Pdcd11	0.000486853	-0.656687	0.683	0.785	1
Slc35f4	0.000486976	-0.837446	0.244	0.462	1
AABR07064299.1	0.000497181	-0.786771	0.073	0.308	1
Zfp40	0.000502695	-0.792594	0.39	0.615	1
Lgals3bp	0.000504043	-0.810913	0.037	0.215	1
Zbtb16	0.000505346	-0.969931	0.085	0.308	1
Rhobtb3	0.00051393	-0.53199	0.012	0.138	1
Fkbp1b	0.000520958	-0.563499	0.646	0.785	1
Kcnip4	0.000534503	-0.509203	0.78	0.862	1
Abcc8	0.000558946	-0.801685	0.427	0.569	1
Ttc8	0.000565308	-0.663115	0.134	0.4	1
Appl2	0.000570659	-0.715408	0.049	0.231	1
Sorcs2	0.000578142	-0.501495	0.561	0.738	1
LOC102554178	0.000584775	-0.734611	0.122	0.415	1
Zbtb9	0.000606821	-0.760975	0.037	0.215	1
Camk1g	0.000611825	-0.720256	0.537	0.677	1
Plekha5	0.000617588	-0.836462	0.646	0.8	1
AABR07037520.1	0.000620981	-0.532707	0.915	0.938	1
Ccnyl1	0.000630637	-0.935331	0.085	0.262	1
Pcdh9	0.000635207	0.648772	1	0.954	1
Fxyd6	0.00064619	-0.595651	0.195	0.462	1
Nup214-155511	0.000653306	-0.72599	0.012	0.185	1
Cntn4	0.000663587	0.928279	0.61	0.292	1
Mblac1	0.000667368	-0.577937	0.061	0.277	1
LOC100912031	0.000682637	-0.500596	0.585	0.708	1
Hpca	0.000704534	-0.667298	0.317	0.523	1
B230118H07Rik	0.000711033	0.851682	0.427	0.169	1
Ppargc1a	0.000731569	0.8561	0.841	0.6	1
Rgs2	0.000737662	0.836916	0.89	0.769	1
Chd1	0.000743775	-0.748698	0.512	0.662	1
Fam214a	0.00074485	-0.507111	0.146	0.385	1
Kcna4	0.000750449	-0.575628	0.573	0.738	1
Morc4	0.000752432	-0.50587	0.012	0.169	1
Gria3	0.000755761	0.858375	0.744	0.477	1
Tnk2	0.000756703	-0.623113	0.561	0.708	1
Usmg5	0.000778211	0.523173	1	0.969	1
AABR07059778.1-Nxph1	0.000800879	1.04411	0.476	0.246	1
AABR07044362.3	0.000801102	-0.503829	0.085	0.338	1
Ttc39c	0.00081621	-0.782572	0.305	0.523	1
Kcnk13	0.000816744	-0.795945	0.061	0.262	1
Tbc1d30	0.000832176	-0.617594	0.183	0.477	1
Grip1	0.000833612	-0.594807	0.866	0.877	1
Gnai1	0.000834477	0.770816	0.695	0.492	1
St8sia3	0.000838994	-0.820119	0.768	0.831	1
Arhgap6	0.000857428	0.871243	0.159	0.015	1
Ctnnd2	0.000887222	-0.714743	0.866	0.846	1
LOC103694355	0.000902068	-0.653926	0.415	0.646	1
LOC108351137-174229	0.000917116	0.506163	1	1	1
U6-188822	0.000918714	-0.957116	0.22	0.385	1
Gab2	0.000932573	-0.637797	0.305	0.523	1
Nr4a3	0.000952527	0.920348	0.561	0.308	1
Tmem150c	0.000963033	-0.603192	0.061	0.246	1
1500011B03Rik	0.000984926	-0.571422	0.793	0.862	1
Pde2a	0.000999954	1.22839	0.39	0.185	1
Fam20b	0.00100997	-0.573598	0.683	0.754	1
Dach2	0.0010198	0.943539	0.207	0.031	1
Klhdc8b	0.00102939	-0.644008	0.78	0.815	1
Dcaf4	0.00104145	-0.589007	0.061	0.262	1
Reck	0.00104295	-0.618454	0.024	0.169	1
AABR07060833.1	0.00105805	-0.561881	0.72	0.785	1
Cars2	0.00105842	-0.682108	0.378	0.585	1
Hes6	0.00106565	0.755394	0.817	0.615	1
Tll1	0.00106777	0.816532	0.695	0.323	1
LOC108352150	0.00107395	-0.535639	0.073	0.323	1
Cfap69	0.00108224	-0.633459	0.634	0.769	1
Pygb	0.00108247	-0.533149	0.598	0.769	1
Aak1	0.00108487	-0.507794	0.89	0.923	1
Hist1h2bh	0.001095	-0.612289	0.451	0.6	1
GL.28780	0.00112141	-0.843506	0.061	0.277	1
Mgat5b	0.00123371	-0.554415	0.28	0.492	1
Adamts15	0.0012557	0.723179	0.268	0.077	1
Ncbp3	0.00126562	-0.603011	0.207	0.446	1
C87436	0.00128643	-0.515804	0.098	0.308	1
Tubb2b	0.00136115	0.617789	0.988	0.954	1
Numa1	0.00136876	-0.759687	0.463	0.615	1
Cryl1	0.00138247	-0.879569	0.22	0.385	1
AW209491	0.00139776	-0.612264	0.122	0.308	1
Gnpnat1	0.00140272	-0.555105	0.098	0.323	1
Upf1	0.00142738	-0.685588	0.317	0.492	1
Tnr	0.00144574	1.13403	0.476	0.246	1
Nrtn	0.00144843	-0.600057	0.073	0.308	1
LOC102553232	0.00147979	-0.527796	0.037	0.215	1
Zfp1	0.00147993	1.28375	0.354	0.2	1
Traf3ip1	0.00148408	-0.831613	0.585	0.646	1
Mef2c	0.00148976	0.599581	1	0.985	1
Msi2	0.00150439	-0.712744	0.378	0.585	1
Fbxl20	0.001532	-0.64281	0.244	0.446	1
Gadd45a	0.00154003	-0.555461	0.049	0.215	1
Cpeb1	0.00155505	-0.697221	0.28	0.523	1
Pdcd2l	0.00155773	1.08023	0.354	0.185	1
Ugdh	0.00163544	-0.681065	0.256	0.462	1
Wdr73	0.00164632	-0.523853	0.098	0.308	1
Caln1	0.00165636	-1.00477	0.073	0.231	1
Frem1	0.00166829	-0.575277	0.024	0.154	1
Kmt2c	0.0016809	-0.685883	0.585	0.738	1
Mau2	0.00168292	-0.520763	0.744	0.862	1
Ildr2	0.00170547	-0.54584	0.195	0.369	1
Plxdc2	0.00178048	-0.529886	0.866	0.877	1
Senp8	0.00178765	-0.736237	0.22	0.369	1
Zfpl1	0.00181729	-0.659459	0.268	0.462	1
Etv5	0.00182136	0.587567	0.561	0.262	1
Stim1	0.00191196	-0.644577	0.341	0.508	1
Slitrk5	0.00191264	0.738791	0.732	0.523	1
Rbfox1	0.00192467	0.749243	0.805	0.631	1
Gcc2	0.00195475	0.624989	0.878	0.692	1
Cntn3	0.00197517	-0.879349	0.085	0.277	1
Slc25a27	0.00199856	-0.79127	0.659	0.738	1
Kcnj2	0.00200801	-0.720526	0.171	0.4	1
Slc7a4	0.00201951	-0.769027	0.098	0.323	1
Bcs1l	0.00203164	-0.760802	0.378	0.523	1
Cdc123	0.00205359	-0.567838	0.707	0.8	1
Diaph1	0.00206787	-0.566227	0.098	0.292	1
Scyl2	0.00208501	-0.505708	0.354	0.554	1
Amigo1	0.00208713	-0.608383	0.451	0.6	1
Med17-Panx1	0.00212513	-0.762026	0.11	0.338	1
Amn1	0.00213678	-0.837286	0.366	0.508	1
Gpr22	0.00214976	0.567999	0.695	0.446	1
Ankrd10	0.0021531	-0.645829	0.695	0.785	1
Stat2	0.00216414	-0.736685	0.341	0.477	1
Rnaseh2b	0.00217626	-0.563186	0.024	0.215	1
Ube2f	0.00220346	-0.611659	0.573	0.677	1
Zfp496	0.00222196	-0.621158	0.061	0.215	1
Tmem164	0.00226613	0.678059	0.146	0.015	1
Btbd3	0.0022905	0.802675	0.561	0.338	1
Rapgef5	0.00231643	-0.657215	0.524	0.631	1
Lancl1	0.00233415	0.528611	0.976	0.846	1
Gtf2h3	0.00233677	-0.782628	0.293	0.415	1
Kcnh2	0.00233872	-0.523194	0.695	0.754	1
Epha3	0.0024063	-0.827487	0.598	0.692	1
Rfc4	0.00241056	-0.642232	0.11	0.308	1
7SK-206226	0.00242082	-0.685199	0.061	0.231	1
AABR07064873.1	0.00246868	-0.558264	0.061	0.262	1
Rock1	0.0024863	-0.620231	0.951	0.938	1
Npas1	0.00252127	-0.971289	0.098	0.262	1
Cdh10	0.0025453	-0.61621	0.329	0.492	1
Mtx1	0.00256817	-0.57493	0.524	0.631	1
Sipa1l2	0.00256873	0.730735	0.537	0.262	1
Olfm3	0.00258565	-0.534861	0.476	0.615	1
Ndst3	0.00259091	0.703485	0.171	0.031	1
AABR07001923.1	0.0027097	-0.834263	0.256	0.415	1
Man2a1	0.00273975	0.958873	0.463	0.292	1
Mapk3	0.00275541	0.583636	0.366	0.2	1
Rars2	0.00276123	-0.61689	0.134	0.354	1
Adora1	0.00277154	-0.567838	0.232	0.462	1
Fnbp4	0.00279745	-0.686221	0.756	0.815	1
Tlk2	0.00281188	-0.622576	0.659	0.738	1
AABR07024769.1	0.00284965	-0.619779	0.451	0.631	1
Ugt1a3-Ugt1a8-Ugt1a2-Ugt1a9-Ugt1a1-Ugt1a6-Ugt1a7c-Ugt1a5	0.00287048	-0.672888	0.085	0.292	1
Fam3a	0.00296222	-0.589007	0.085	0.231	1
Usp40	0.00300938	-0.801782	0.171	0.354	1
Pygl	0.00311689	1.05388	0.207	0.062	1
Slc37a4	0.00313741	-1.01028	0.098	0.246	1
Gpc3	0.00322294	-0.523194	0.098	0.292	1
U2af1l4-Igflr1	0.0032296	-0.673962	0.634	0.692	1
Nxpe3	0.00343999	-0.577979	0.22	0.385	1
Sox4	0.00344853	0.789907	0.634	0.369	1
Ccdc32	0.00345784	-0.715285	0.463	0.554	1
Cwc25	0.00352367	-0.626624	0.732	0.769	1
Ehbp1	0.00359749	-0.54885	0.512	0.646	1
Gpc4	0.00360701	-0.654965	0.305	0.462	1
Tvp23a	0.00363818	-0.721717	0.317	0.477	1
Susd4	0.00364181	-0.644522	0.561	0.662	1
Plec	0.00370292	-0.872078	0.5	0.569	1
Kyat3	0.00370501	-0.753815	0.268	0.4	1
Rchy1	0.00370751	-0.702336	0.451	0.538	1
Ahctf1-Kif28p	0.00376201	-0.520014	0.061	0.185	1
Sesn3	0.00377205	-0.571839	0.549	0.631	1
Ralgapa2	0.00377771	-0.516904	0.061	0.292	1
Polb	0.00382153	-0.607132	0.768	0.815	1
Gpank1	0.00387618	-0.827623	0.341	0.462	1
Heg1	0.0039	-0.535639	0.049	0.246	1
Dpysl3	0.00390826	0.541072	0.683	0.385	1
Megf11	0.00391274	-0.628363	0.098	0.292	1
Abhd5	0.00391913	-0.604571	0.122	0.262	1
Clic2	0.00393693	-0.644718	0.073	0.185	1
Dpp6	0.00394995	-0.632019	0.732	0.754	1
Stat1-250777	0.00397344	-0.64046	0.159	0.308	1
Igsf21	0.00397597	-0.630471	0.073	0.262	1
Tep1	0.00400097	-0.682249	0.037	0.154	1
LOC691189	0.00403789	0.573892	0.195	0.062	1
Btbd9	0.00413116	-0.706574	0.512	0.585	1
Katnb1	0.00427748	-0.610182	0.524	0.615	1
Usp28	0.00429895	-0.641414	0.366	0.569	1
LOC102556249	0.00435533	-0.66765	0.28	0.385	1
Mrpl20	0.00446127	-0.627385	0.817	0.877	1
Epb41l2	0.00452597	-0.522728	0.061	0.2	1
Ppp4r2	0.00452681	-0.587245	0.573	0.662	1
Rgs4	0.00484941	1.00583	0.646	0.385	1
Arhgap4	0.00486281	-0.781137	0.073	0.169	1
Nptx1	0.00491088	0.554747	0.122	0.015	1
AABR07016841.1	0.0049505	1.07689	0.378	0.2	1
Thop1	0.00497194	0.770573	0.28	0.108	1
Ptprj	0.004983	-0.705183	0.378	0.538	1
2020-03-07	0.0050061	-0.560711	0.585	0.708	1
Piezo2	0.0050643	-0.755727	0.146	0.354	1
Arhgef17	0.00507422	-0.508964	0.012	0.138	1
Morc3	0.00509216	-0.743158	0.22	0.462	1
Snca	0.00509831	-0.550346	0.768	0.8	1
Unc5b	0.00510204	-0.546447	0.012	0.108	1
Sema6a	0.00511529	-0.687724	0.524	0.6	1
Plekha2	0.00522351	0.651555	0.146	0.031	1
Epb41l5	0.00522574	-0.831953	0.171	0.354	1
Ppid	0.00525143	0.587109	0.78	0.646	1
Ubl5	0.00538149	0.553021	0.963	0.892	1
AABR07051804.1	0.00542003	-0.713509	0.024	0.138	1
Pck2	0.00548631	-0.514564	0.293	0.523	1
Pex2	0.00552235	-0.577172	0.049	0.2	1
Unc5d	0.00585058	-0.732246	0.488	0.554	1
Rapgef2	0.00588416	-0.561931	0.646	0.723	1
LOC102547802	0.00588733	-0.545886	0.524	0.615	1
Tmtc4	0.00589476	0.687524	0.366	0.154	1
Fbxo42	0.00589989	0.568274	0.427	0.2	1
Drc1	0.00590385	-0.559754	0.061	0.231	1
Ift57	0.00596601	0.641839	0.732	0.462	1
Pthlh	0.00596735	0.690623	0.659	0.415	1
Prmt3	0.006113	-0.674702	0.195	0.354	1
AABR07027979.1	0.0061313	-0.70562	0.061	0.2	1
Cep192-103385	0.00621936	-0.778876	0.049	0.123	1
Osbpl1a	0.00625963	0.718075	0.854	0.677	1
Mtmr14	0.00631532	-0.655452	0.122	0.308	1
Vps53	0.00636363	-0.72014	0.756	0.754	1
Pcdhga1-Pcdhga1-Pcdhga10-Pcdhga11-Pcdhga12-Pcdhga2-Pcdhga3-Pcdhga5-Pcdhga7-Pcdhga8-Pcdhga9-Pcdhgb7-Pcdhgb8-Pcdhgc3	0.00648206	-0.650067	0.11	0.262	1
Peli3	0.00660891	-0.559154	0.061	0.246	1
Ghr	0.00670213	-0.733812	0.024	0.123	1
Stmn4	0.00674718	0.692751	0.89	0.769	1
Gucy1a2	0.00682759	-0.702336	0.159	0.308	1
Ypel2	0.00687719	-0.512913	0.439	0.631	1
Osbpl10	0.00691903	-0.594256	0.134	0.308	1
Ebpl	0.007169	0.759111	0.171	0.046	1
Mrpl14	0.00717854	0.679034	0.829	0.6	1
Zfp236	0.00719326	-0.669954	0.061	0.2	1
Rragd	0.00734418	-0.61141	0.146	0.292	1
Rbpj	0.00736784	-0.559428	0.402	0.523	1
Pwwp2a	0.00745122	-0.530166	0.195	0.369	1
LOC102547703	0.0075214	-0.635038	0.488	0.569	1
Cdkn1b	0.00752769	-0.620222	0.598	0.631	1
Tmbim1	0.00752825	-0.514564	0.061	0.169	1
Tial1	0.00755986	-0.504389	0.683	0.754	1
Cbfa2t3	0.00763214	-0.580056	0.049	0.2	1
Fat3	0.00765239	0.922759	0.622	0.385	1
Gnaq	0.00773945	0.789091	0.951	0.892	1
Tbc1d9b	0.00774079	-0.650726	0.585	0.646	1
Mpp3	0.00776106	-0.583258	0.268	0.385	1
Zfp507-AABR07002997.1-AABR07002997.2	0.00776207	-0.560448	0.061	0.215	1
Tmem117	0.00776845	-0.561104	0.159	0.338	1
Htr2a	0.00778424	-0.770129	0.232	0.338	1
2020-09-06	0.00781751	0.56304	0.89	0.723	1
Cep164	0.00782256	-0.656936	0.427	0.585	1
Mitf	0.00790832	-0.883568	0.11	0.277	1
AABR07035273.1	0.00799403	-0.533437	0.098	0.246	1
Tmeff2	0.0080131	0.707675	0.707	0.477	1
Zfp612	0.00812137	-0.71984	0.5	0.538	1
U6-189908	0.00818022	1.39908	0.134	0.031	1
Tjp1	0.00835832	-0.625375	0.098	0.215	1
Me1	0.008375	0.660497	0.415	0.169	1
Hist1h1c	0.00854311	-0.504266	0.232	0.415	1
Tmem151b	0.00856577	0.958654	0.732	0.646	1
Tmem229b	0.00859284	-0.674473	0.768	0.8	1
Ctdp1	0.00861058	-0.507435	0.11	0.246	1
Snrpb	0.00862712	0.979659	0.768	0.554	1
Cdc42ep3	0.00865729	0.861672	0.378	0.185	1
Smc5	0.00866475	-0.556856	0.622	0.662	1
Camk4	0.00910297	0.808601	0.415	0.215	1
Rnf166	0.00911269	-0.644966	0.11	0.262	1
Zmat2	0.00926953	0.63183	0.78	0.569	1
Aifm1	0.00930706	-0.635954	0.463	0.538	1
Mpp6	0.00931245	0.775951	0.683	0.415	1
Ercc8	0.00934903	-0.603784	0.561	0.6	1
Gatad2a	0.00940583	-0.515195	0.402	0.585	1
Sv2c	0.00952352	0.757646	0.11	0.031	1
Tmem91	0.00962348	0.709711	0.134	0.046	1
Gpx3	0.00965931	0.658828	0.341	0.169	1
Epdr1	0.00967757	-0.510712	0.329	0.492	1
Zbtb25	0.00975643	-0.628003	0.305	0.462	1
Pbx1	0.00985011	-0.535248	0.488	0.569	1
Kcnt2	0.00987196	-0.596759	0.5	0.662	1
Grin2a	0.00987625	-0.512275	0.683	0.723	1
Tsc22d3	0.0100168	0.615448	0.829	0.6	1
Iqgap1	0.010031	-0.761176	0.146	0.292	1
Syt4	0.0100596	0.855999	0.878	0.769	1
Zfp523	0.0100958	-0.601966	0.256	0.369	1
Bckdhb	0.0102386	0.59194	0.61	0.385	1
Adcy8	0.010388	0.89655	0.476	0.2	1
Akap17a	0.0103947	-0.529993	0.683	0.738	1
Nkapd1	0.0104569	-0.506088	0.39	0.477	1
Dtx4	0.0105461	-0.521433	0.183	0.431	1
Nelfcd	0.0106313	-0.656224	0.378	0.538	1
Pc	0.0107288	-0.652083	0.573	0.662	1
Kif13a	0.0107438	0.729629	0.378	0.169	1
Chmp1b-Gnal	0.0107515	-0.751968	0.378	0.523	1
Hspb11	0.0107577	-0.513744	0.122	0.292	1
Dlg5	0.0108728	-0.775486	0.146	0.308	1
AABR07061453.1	0.0108784	-0.528598	0.439	0.554	1
Nprl2	0.0108934	-0.629471	0.329	0.446	1
Adgra3	0.0110214	0.661486	0.195	0.046	1
Adamtsl3	0.0110239	-0.639637	0.171	0.338	1
Psat1	0.0110649	0.537508	0.134	0.062	1
Hexa	0.0110745	-0.605454	0.415	0.508	1
Clec16a	0.0111758	-0.506605	0.561	0.631	1
Pde8b	0.0111846	0.800529	0.268	0.092	1
Gfpt2	0.0112864	0.566833	0.207	0.092	1
Tgoln2	0.0114105	-0.528967	0.512	0.6	1
B3galt2	0.0114691	-0.57638	0.378	0.538	1
7SK-Sugct	0.0115059	-0.743158	0.049	0.185	1
Zfp709l1	0.011585	-0.501086	0.159	0.338	1
Coq6	0.0117507	-0.596	0.39	0.523	1
Zfp326	0.0118085	-0.671006	0.671	0.692	1
Enc1	0.0119553	0.804289	0.341	0.154	1
Dhx40	0.0119842	-0.655816	0.585	0.677	1
Tp53inp2	0.0120208	0.687627	0.829	0.677	1
Sh3bgrl2	0.0120564	-0.560019	0.037	0.154	1
Slc25a19-Mif4gd	0.0121238	-0.553916	0.305	0.446	1
Klf12	0.0122363	0.634951	0.829	0.538	1
Cat	0.0122726	0.853122	0.598	0.446	1
Pou6f1	0.0123041	-0.653982	0.268	0.385	1
Vps13c	0.0123381	-0.551212	0.683	0.708	1
Sstr4	0.0123386	-0.71988	0.073	0.2	1
D2hgdh	0.0123546	-0.735284	0.207	0.369	1
AABR07073038.2	0.0124087	-0.646485	0.366	0.446	1
Ppip5k2	0.0124226	0.558549	0.988	0.938	1
Tmem87b	0.0125793	-0.516202	0.646	0.723	1
Syt6	0.0126843	-0.729846	0.061	0.2	1
Xrn1	0.0127092	-0.601865	0.549	0.585	1
N4bp2l1	0.0127813	-0.584553	0.28	0.369	1
Borcs6	0.0128893	-0.508119	0.207	0.4	1
Vnn3	0.0129415	0.580162	0.159	0.046	1
7SK-119822	0.0129555	-0.511646	0.037	0.123	1
Cmpk2	0.0130486	-0.555661	0.134	0.323	1
Pdzph1	0.013177	-0.529584	0.098	0.262	1
Def8	0.0131872	-0.567642	0.159	0.323	1
Rab29	0.0133738	0.728659	0.134	0.046	1
GL.20164	0.0136952	-0.7492	0.22	0.369	1
AABR07058884.2	0.0137336	-0.932597	0.207	0.369	1
Glt8d1	0.013874	-0.790705	0.439	0.508	1
Dock9	0.0140175	0.536801	0.244	0.123	1
Ccdc137	0.0140722	-0.538167	0.463	0.538	1
Ivns1abp	0.014181	0.513408	0.756	0.538	1
Bmp3	0.0143406	0.500257	0.183	0.062	1
2210408I21Rik	0.0144091	-0.760399	0.146	0.277	1
Sbno2	0.0144093	-0.671699	0.183	0.308	1
Arl15	0.0144307	0.788894	0.28	0.2	1
Uap1l1	0.0145551	-0.616198	0.146	0.338	1
Dnajb4	0.0147585	0.755135	0.72	0.615	1
Pkmyt1	0.014847	0.66346	0.122	0.046	1
Synj1	0.0148576	-0.54401	0.902	0.923	1
AABR07057798.1	0.0148925	-0.965412	0.098	0.231	1
Cacna2d1	0.0149487	0.947811	0.646	0.477	1
Rcc1l	0.0150324	-0.750126	0.122	0.308	1
Dynlt1	0.015053	0.518617	0.951	0.769	1
Jmy	0.0152185	-0.928922	0.085	0.231	1
Eef1a1	0.015227	0.650959	0.634	0.554	1
Thoc6	0.0153726	-0.952456	0.22	0.323	1
Lama2	0.0153908	0.705938	0.146	0.062	1
Bdnf	0.0154491	1.07445	0.402	0.2	1
GL.32503	0.0154646	-0.503367	0.049	0.2	1
Pmm2	0.0154985	-0.616198	0.305	0.4	1
Htr1a	0.0156551	0.857912	0.159	0.062	1
Zfp105	0.0157154	-0.550786	0.207	0.338	1
Dmtn	0.0159332	0.543259	0.561	0.415	1
Mthfsd	0.0160031	-0.720912	0.049	0.169	1
Trpm3	0.0161112	-0.738081	0.146	0.292	1
Mterf1	0.0162208	-0.564624	0.159	0.323	1
Synm	0.0162289	-0.585972	0.037	0.154	1
Rcan1	0.0163295	0.635532	0.39	0.292	1
Scn3b	0.0165698	-0.556775	0.622	0.662	1
Zbtb46	0.0167453	-0.666996	0.037	0.123	1
Trmt44	0.0168783	-0.600818	0.061	0.185	1
Bhlhe22	0.01697	0.87117	0.134	0.031	1
Net1	0.0169874	0.544197	0.305	0.154	1
GL.3804	0.0170268	-0.61454	0.098	0.215	1
Crebrf-Bnip1	0.0171178	-0.534613	0.659	0.692	1
Ncoa3	0.0172274	-0.503687	0.402	0.569	1
Pds5a	0.0172709	-0.594719	0.695	0.754	1
Mal2	0.0172777	-0.649548	0.098	0.262	1
Leng1	0.0176	0.807172	0.512	0.323	1
Ddah2	0.0178913	0.522541	0.78	0.554	1
Plpp1	0.0180746	-0.600057	0.354	0.477	1
Rttn	0.018193	-0.510258	0.024	0.154	1
Slc29a4	0.0182938	-0.625489	0.415	0.523	1
Shroom2	0.0184775	-0.504406	0.61	0.677	1
Anxa7	0.0184797	-0.535204	0.476	0.569	1
Slf2-U6	0.0185468	-0.687987	0.537	0.585	1
Mob1a	0.0185739	-0.836248	0.085	0.246	1
Gtf2ird1	0.0185739	-0.54048	0.146	0.354	1
Tmem134	0.018722	-0.5525	0.28	0.415	1
Ciao1	0.018778	-0.569127	0.683	0.769	1
Iqgap2	0.0188196	0.923188	0.134	0.031	1
Aen	0.0189723	0.579487	0.732	0.538	1
Snap23	0.019022	-0.627645	0.085	0.169	1
Lpl	0.0192866	1.031	0.317	0.138	1
Pcid2	0.0195636	-1.03084	0.463	0.462	1
Zfyve16	0.0196104	-0.604159	0.134	0.277	1
Aurkc	0.0197414	0.665179	0.244	0.123	1
Dusp6	0.0201112	0.566764	0.207	0.108	1
Wdr61	0.0201449	-0.521458	0.89	0.846	1
Cxadr	0.020207	0.795348	0.829	0.723	1
Drd1	0.0204675	-0.562574	0.122	0.231	1
Prr13	0.0208235	-0.637797	0.329	0.431	1
7SK-188300	0.0209613	-0.527402	0.22	0.354	1
Mat2b	0.020989	0.637167	0.805	0.554	1
Fam151b	0.0209997	-0.570786	0.207	0.385	1
Slc7a1	0.0210904	-0.516844	0.463	0.508	1
Adpgk	0.0212478	-0.517308	0.549	0.662	1
Spaca6	0.0213019	-0.643431	0.073	0.2	1
Acvr2b	0.021371	-0.646455	0.049	0.169	1
Fat1	0.0216292	0.567933	0.61	0.415	1
Clic4	0.0219132	-0.522642	0.061	0.169	1
Slc1a1	0.0219264	-0.522991	0.768	0.769	1
Slc35c1	0.0224902	-0.541337	0.159	0.323	1
Urb1	0.0227708	-0.542487	0.098	0.215	1
Eya4	0.0227857	0.587567	0.11	0.015	1
Sts	0.0228498	-0.533657	0.085	0.169	1
Gabrg1	0.0238882	0.508318	0.5	0.292	1
Rims3	0.0240589	-0.525319	0.061	0.138	1
Rp9	0.024205	-0.517749	0.415	0.508	1
Zc3h7a	0.0243125	-0.636538	0.598	0.585	1
Camlg	0.0243397	0.976567	0.659	0.492	1
Rdh14	0.0243552	-0.59184	0.585	0.6	1
Ell2	0.0244816	-0.656382	0.305	0.431	1
Zfp532	0.0244959	0.878476	0.561	0.431	1
Tbc1d17	0.0245216	0.571404	0.463	0.338	1
Dock4	0.0247095	1.25463	0.622	0.462	1
Prkg2	0.0248098	0.509605	0.134	0.031	1
Cd83	0.0258183	0.746934	0.159	0.062	1
Itgae	0.0258797	0.655521	0.268	0.138	1
Pde5a	0.0258971	-0.697516	0.098	0.231	1
Gdpd1	0.025925	-0.614726	0.671	0.662	1
Jmjd1c	0.0263992	-0.58272	0.634	0.646	1
Miat	0.0264762	-0.72583	0.549	0.6	1
Kctd1	0.0265192	-0.561636	0.073	0.185	1
Slc7a3	0.026698	0.665031	0.659	0.554	1
Ap5z1	0.0267058	-0.63575	0.146	0.308	1
Moxd1	0.0268266	0.547827	0.134	0.046	1
Thap3	0.0273204	-0.769725	0.683	0.723	1
Snx18	0.0274816	0.643137	0.195	0.092	1
Plxnb2	0.0277515	-0.661567	0.073	0.169	1
Ppp4r3a	0.027755	0.825104	0.561	0.431	1
Ppm1e	0.0279172	0.538676	0.939	0.862	1
Tada2b	0.0279291	-0.500242	0.268	0.369	1
Pcsk2	0.0280175	-0.540534	0.463	0.523	1
Hpcal4	0.0280872	1.07748	0.451	0.277	1
Baz2b	0.0283365	-0.600238	0.585	0.631	1
Tada2a	0.0285907	-0.637797	0.598	0.6	1
Pask	0.0286307	-0.54392	0.061	0.154	1
BC017158	0.0287004	-0.620098	0.134	0.292	1
Klhl18	0.028739	0.640941	0.378	0.246	1
Gdpd5	0.0290549	-0.585153	0.146	0.308	1
Mettl6	0.0297785	-0.514079	0.268	0.4	1
Cdk5r2	0.029822	0.501861	0.768	0.646	1
Fam110b	0.0298657	0.634769	0.707	0.569	1
LOC102554315	0.029951	-0.500133	0.134	0.262	1
Aasdhppt	0.0303964	-0.53409	0.744	0.769	1
Cyld	0.0309415	-0.56718	0.171	0.354	1
Ints8	0.031219	-0.54885	0.549	0.569	1
Emc10	0.0312243	0.68914	0.793	0.631	1
Sox9	0.0323748	-0.510612	0.085	0.323	1
Elp1	0.0324879	-0.525245	0.732	0.754	1
Nhlrc2	0.0326663	-0.510797	0.037	0.138	1
Ikzf5-2310057M21Rik	0.0327188	0.581565	0.598	0.354	1
Nhlrc3	0.0331943	-0.565271	0.415	0.523	1
Itch	0.0333869	-0.740957	0.512	0.569	1
Htr2c	0.0339163	0.706773	0.159	0.062	1
Cdc26	0.0342856	0.623203	0.488	0.323	1
Rpa1	0.0344605	-0.590006	0.085	0.169	1
Sulf2	0.0344813	-0.597631	0.134	0.277	1
Cd302	0.0344909	-0.671843	0.049	0.185	1
Ogfrl1	0.0346643	-0.722955	0.085	0.215	1
Nfatc3	0.0346952	1.18303	0.39	0.246	1
Spindoc	0.0351722	-0.683112	0.244	0.323	1
Zkscan3	0.035275	0.742711	0.61	0.385	1
Pms1	0.0353557	1.15108	0.232	0.154	1
Wdr49	0.0354252	1.09563	0.11	0.031	1
Tmem50a	0.0355098	-0.509037	0.744	0.738	1
Uspl1	0.0358463	0.80376	0.415	0.338	1
Ide	0.036031	-0.630471	0.598	0.6	1
LOC108348215	0.0366033	-0.569686	0.159	0.292	1
Bcorl1	0.0366797	-0.539817	0.061	0.138	1
Pstk	0.0368184	-0.641228	0.439	0.462	1
Col5a1	0.036884	-0.842591	0.024	0.108	1
Pced1a	0.0369472	-0.696986	0.232	0.385	1
Lactb	0.0371311	-0.779627	0.207	0.338	1
Pank1	0.0374918	0.554147	0.78	0.646	1
Tcf3	0.0376189	-0.532135	0.098	0.231	1
Kcnma1	0.0380091	0.829288	0.622	0.369	1
Rassf5	0.038335	0.720892	0.317	0.246	1
Dnal4	0.038624	-0.546262	0.183	0.292	1
Rtn2	0.0387649	0.513353	0.732	0.538	1
Alg13	0.0389604	-0.562574	0.293	0.4	1
Nrep	0.0390671	0.522184	0.488	0.385	1
LOC100911221	0.0391485	-0.675716	0.073	0.169	1
Wrn	0.0394489	-0.719086	0.22	0.369	1
Rasgrp2	0.0398355	-0.596079	0.22	0.338	1
Xylb	0.0400125	-0.543052	0.122	0.262	1
Sft2d2	0.0400374	-0.874186	0.073	0.154	1
LOC691170	0.0401134	-0.598657	0.146	0.323	1
Ppp1r36	0.0405155	-0.80125	0.073	0.2	1
Sin3a	0.0406921	-0.668381	0.207	0.308	1
Gipr	0.0412751	0.626139	0.171	0.077	1
Rabgap1l-Gpr52	0.0415222	-0.53859	0.11	0.246	1
Sclt1	0.0415425	-0.565099	0.427	0.477	1
Ifi27l2b	0.041697	0.959174	0.195	0.123	1
Thsd7b	0.0417452	0.921732	0.122	0.046	1
Plxna2	0.0417951	0.611052	0.707	0.569	1
GL.1450	0.0420827	-0.589007	0.049	0.123	1
Cntn6	0.0421149	0.691802	0.244	0.123	1
Ppp1r14d	0.0421969	-0.553652	0.037	0.123	1
Wdr20	0.0422685	-0.512171	0.073	0.138	1
Rnf167	0.0428043	-0.521193	0.463	0.508	1
Polr3gl	0.0429462	-0.560836	0.122	0.262	1
Pde7a	0.0434273	-0.502622	0.085	0.215	1
Anks3	0.0434424	-0.561257	0.39	0.462	1
Tcta	0.043617	-0.545886	0.671	0.677	1
Eif2ak1	0.043667	-0.742703	0.683	0.662	1
Sh3rf1	0.0440919	0.616976	0.122	0.046	1
Plpp5	0.0442484	-0.66765	0.098	0.2	1
Dnajc21	0.0443504	0.568274	0.366	0.246	1
Aqr	0.0443553	-0.599613	0.598	0.615	1
Ap3s1	0.0446113	0.52235	0.829	0.754	1
Map2	0.0446158	0.517398	1	1	1
LOC100912097-001864	0.0450201	-0.534988	0.085	0.185	1
Pitrm1	0.0454006	0.602002	0.427	0.323	1
Nmnat2	0.0456211	-0.813362	0.085	0.154	1
Nars2	0.0460471	-0.995766	0.11	0.169	1
Pop7	0.0475807	-0.73011	0.61	0.646	1
Mphosph9	0.0478046	-0.501322	0.11	0.292	1
Ice2	0.0480069	0.934418	0.268	0.154	1
Cep57	0.0481463	-0.57815	0.402	0.462	1
Krba1	0.0481646	-0.671054	0.256	0.323	1
Tomm40l	0.0486131	-0.537074	0.524	0.569	1
AC119762.6	0.0493144	-0.628407	0.085	0.185	1
Plekhm1	0.0495169	-0.641228	0.061	0.138	1
Nudcd2	0.0499907	-0.561931	0.11	0.231	1
Tenm2	0.0505506	0.566013	0.829	0.738	1
Cdh12	0.0508531	0.558027	0.463	0.292	1
Bcl11a	0.0508706	0.579599	0.293	0.2	1
Stxbp6	0.050912	1.14686	0.183	0.123	1
Fam227a	0.0514478	-0.697516	0.146	0.2	1
Dusp18	0.0519336	0.613785	0.341	0.262	1
Fzd3	0.0520953	0.503505	0.756	0.692	1
Mzf1	0.0527253	-0.75558	0.085	0.185	1
Pkd2	0.0540102	-0.619779	0.146	0.215	1
Fjx1	0.054148	1.02624	0.244	0.154	1
Ralgapb	0.0541725	-0.579469	0.756	0.769	1
Klc4	0.0551567	0.620243	0.22	0.2	1
Nop9	0.0556549	0.667736	0.183	0.123	1
Ablim2	0.0557409	-0.531738	0.354	0.492	1
Penk	0.0563234	-0.629017	0.207	0.415	1
Eif2a	0.0565057	-0.684803	0.463	0.477	1
Atp8b3	0.0571092	-0.579386	0.037	0.123	1
LOC102553001	0.058005	-0.630444	0.146	0.262	1
Yes1-AABR07068850.1	0.0590497	0.690168	0.537	0.4	1
Ankrd13a	0.0590966	0.557665	0.293	0.2	1
Sesn1	0.0599429	-0.580299	0.256	0.354	1
Gatb	0.0602413	-0.54599	0.159	0.277	1
Gatc	0.0603128	0.603169	0.415	0.292	1
Arnt	0.0609524	-0.523298	0.354	0.477	1
Cnih3	0.0610592	0.659861	0.134	0.062	1
Tmtc2-U6	0.0614631	-0.511917	0.024	0.108	1
AABR07033882.1	0.0619546	-0.513816	0.78	0.769	1
Cenpl	0.0619755	0.523119	0.11	0.062	1
LOC102554070	0.0620704	-0.721738	0.732	0.662	1
Pnoc	0.0625064	0.570469	0.939	0.923	1
Pkig	0.0627554	0.509948	0.537	0.385	1
Prorsd1	0.0634932	-0.513234	0.207	0.323	1
Dars2	0.0635964	-0.521921	0.134	0.262	1
Adnp2	0.0636986	-0.591706	0.207	0.277	1
Por	0.0651488	0.599894	0.671	0.569	1
Traf6	0.0652626	-0.72812	0.134	0.246	1
Hmox1	0.0652687	-0.511646	0.049	0.108	1
Svip	0.0655328	0.614966	0.634	0.523	1
Pwwp3b	0.0657303	-0.963219	0.122	0.2	1
Pard6a	0.0661296	0.587764	0.573	0.385	1
Zswim9	0.0672722	-0.624587	0.049	0.154	1
Pfas-AC126877.1	0.0678866	0.518635	0.183	0.154	1
Thap6	0.0692895	-0.620703	0.073	0.169	1
Galnt16	0.0699976	0.522184	0.476	0.369	1
Vom2r46	0.0702132	-0.646766	0.085	0.169	1
Prelid3b	0.0708179	0.767998	0.415	0.354	1
Ogfod2	0.0709468	-0.578764	0.134	0.246	1
Slc38a6	0.0711679	-0.887379	0.061	0.138	1
Cxxc5	0.0712342	0.730676	0.317	0.2	1
Pogk	0.0715375	-0.521965	0.171	0.262	1
Galnt1	0.0719742	0.592899	0.659	0.538	1
Pcdhb3	0.0734235	-0.539245	0.073	0.169	1
Tex2	0.0739923	0.600235	0.439	0.354	1
Yif1a	0.0740814	-0.563321	0.39	0.431	1
Mt1-Mt3-Mt2A	0.074332	0.769843	0.878	0.738	1
Ndrg2	0.0751298	0.545076	0.207	0.138	1
Diras2	0.0754963	0.949316	0.171	0.062	1
Nrip1	0.0756752	-0.572461	0.207	0.308	1
Gadd45g	0.0761013	-0.806737	0.598	0.523	1
Lrrc4	0.0774441	0.737288	0.524	0.4	1
Mfsd8	0.0779231	-0.66092	0.11	0.2	1
Atf7	0.0783162	0.538524	0.244	0.185	1
Zfp84-001131	0.0783985	0.696862	0.122	0.046	1
Lin7a	0.0785805	-0.814814	0.098	0.169	1
Lpin1	0.0793047	-0.705913	0.476	0.508	1
Zc3h18	0.0814725	0.864113	0.415	0.292	1
Galk1	0.0818019	0.524329	0.537	0.415	1
Kdm1a	0.0819852	-0.961333	0.732	0.738	1
Nrp1-Mir1903	0.0825803	1.09245	0.207	0.123	1
Zfp189	0.0832402	-0.572658	0.085	0.2	1
Rnd3	0.0837644	0.529134	0.159	0.077	1
Mthfd2l	0.0840332	0.506278	0.134	0.077	1
Dlc1	0.0846707	-0.727502	0.061	0.138	1
LOC102546421	0.084999	-0.565302	0.561	0.538	1
Micall1	0.0854465	-0.527677	0.28	0.323	1
Dek	0.0861465	0.512011	0.646	0.508	1
Zfp202	0.0870267	0.640324	0.171	0.108	1
Lamp5	0.0870397	0.739529	0.122	0.046	1
Gmds	0.0876925	0.908219	0.415	0.338	1
Plod1	0.0881392	-0.508263	0.037	0.108	1
Sema3c	0.088183	1.01146	0.183	0.108	1
Naxe	0.0883924	0.534923	0.524	0.431	1
U4-094225	0.0885547	0.543812	0.256	0.185	1
AW554918	0.0887842	0.602696	0.11	0.046	1
Prdm15	0.0895389	-0.530166	0.085	0.138	1
Ldlr	0.0913001	-0.597489	0.585	0.554	1
Hs6st3	0.0913593	0.682454	0.28	0.185	1
Ppm1a	0.0918831	0.50857	0.805	0.646	1
Tab3	0.0927692	-0.543545	0.22	0.338	1
LOC685203	0.0927794	-0.65915	0.085	0.2	1
Xpc	0.0933177	-0.521458	0.28	0.369	1
Sec14l2	0.0949891	0.578598	0.171	0.108	1
Scai	0.0961155	-0.812684	0.11	0.231	1
Ppil1-Grm4-Mln-Lemd2	0.0963127	-0.505511	0.488	0.523	1
Coq4	0.096756	0.518444	0.317	0.215	1
Champ1	0.0986575	0.632665	0.366	0.292	1
Sync	0.0994641	-0.655189	0.183	0.246	1
Dcaf1	0.0996866	0.564535	0.537	0.462	1
Tmem87a	0.100787	0.687343	0.488	0.369	1
Maob	0.101006	0.605266	0.134	0.108	1
Ccdc167	0.101878	0.554928	0.11	0.092	1
Mroh8	0.102912	0.826919	0.195	0.138	1
Mtif3	0.103842	-0.612607	0.122	0.215	1
Tbc1d2b	0.104385	-0.6137	0.098	0.169	1
Nt5m	0.104471	-0.747496	0.512	0.431	1
Gpatch2l	0.104691	0.534923	0.159	0.154	1
Pcdh20	0.104896	-0.650067	0.061	0.108	1
AABR07029002.3	0.105079	-0.595597	0.049	0.154	1
Usp25	0.105286	0.51424	0.134	0.108	1
Syn1	0.10595	0.675795	0.878	0.862	1
Trpc3	0.108089	-0.814254	0.256	0.292	1
Asic2	0.108313	-0.589007	0.049	0.123	1
Exoc6	0.108356	0.517434	0.22	0.138	1
Golga7b	0.111011	0.978263	0.732	0.662	1
Klf7	0.111981	0.719882	0.646	0.508	1
Cryab	0.112163	0.761801	0.195	0.092	1
Smc4	0.113015	0.588649	0.171	0.108	1
Hs2st1	0.113818	0.503375	0.756	0.6	1
Lrfn5	0.115472	-0.592067	0.427	0.492	1
Utp23	0.117149	0.541856	0.39	0.246	1
Rnasel	0.117949	0.669216	0.11	0.046	1
Ago3	0.119348	-0.531003	0.183	0.292	1
AABR07043510.1	0.11955	0.858216	0.183	0.154	1
Shc3	0.119921	0.681873	0.805	0.723	1
Ube2e2	0.121716	0.629011	0.634	0.538	1
Myo3a	0.123086	0.513613	0.122	0.046	1
Myo5b	0.12347	0.67171	0.354	0.262	1
Atp11c	0.123782	-0.608704	0.159	0.292	1
Papola	0.124377	0.567019	0.878	0.723	1
Cry2	0.124831	-0.508239	0.622	0.615	1
Slc35a1	0.128053	-0.527012	0.366	0.385	1
Rpp14	0.129571	-0.56639	0.476	0.446	1
Klhl29	0.129596	0.501637	0.171	0.108	1
Armc7	0.130055	-0.501552	0.134	0.2	1
Tmem250	0.130254	-0.533437	0.146	0.2	1
Casp4	0.131938	0.775721	0.122	0.123	1
AABR07035787.1	0.132102	-0.522642	0.537	0.569	1
Atp5f1c-094164	0.133702	-0.536744	0.317	0.292	1
Bend6	0.135625	-0.575805	0.366	0.415	1
Inpp5j	0.136583	0.71841	0.598	0.446	1
Sbno1	0.138118	-0.578799	0.146	0.246	1
Alkbh5	0.138395	-0.593345	0.537	0.523	1
Zfp84-001130	0.139382	0.535778	0.39	0.262	1
Slc25a40	0.139613	0.560605	0.134	0.062	1
Col5a2	0.142109	0.540012	0.159	0.077	1
Cyp20a1	0.142427	-0.584036	0.11	0.185	1
Kif15	0.143407	0.668749	0.146	0.062	1
Dab2ip	0.143471	0.664594	0.439	0.369	1
Car2	0.143698	0.507222	0.537	0.4	1
Zfp110	0.143845	-0.637797	0.256	0.292	1
Il12rb2	0.143958	0.518116	0.561	0.415	1
Asxl3	0.14403	1.09879	0.268	0.2	1
Gstk1	0.14447	0.693811	0.207	0.138	1
Lysmd1	0.144815	0.648452	0.402	0.262	1
Tmem260	0.144876	0.539067	0.159	0.123	1
Abraxas1	0.144939	-0.510642	0.098	0.185	1
Mapk8ip1	0.146315	0.555523	0.829	0.677	1
Mrps16	0.147467	0.560966	0.683	0.569	1
Pxmp4	0.148928	0.559487	0.39	0.369	1
Tas2r143	0.149484	0.526157	0.634	0.508	1
Tomm34	0.150008	-0.579833	0.28	0.4	1
AABR07013918.1	0.150094	0.507335	0.232	0.123	1
Snx7	0.150961	0.522059	0.256	0.292	1
MAST1-Mir3550	0.154143	0.561194	0.585	0.523	1
RGD1559622	0.15426	0.520954	0.195	0.108	1
Gmfb	0.154358	0.542616	0.878	0.738	1
Wdr41	0.158598	0.682218	0.598	0.446	1
Pm20d2	0.159321	-0.531113	0.122	0.185	1
Khdrbs2	0.161348	1.12258	0.427	0.323	1
1810010H24Rik	0.161825	-0.513413	0.085	0.154	1
AC115666.1	0.165115	-0.682133	0.11	0.154	1
Cep250	0.166376	-0.567768	0.317	0.385	1
St6galnac4	0.166449	0.71905	0.549	0.477	1
Krcc1	0.166823	0.540858	0.232	0.169	1
Brd1	0.168623	0.538842	0.451	0.385	1
Casp2	0.171562	-0.630577	0.122	0.169	1
AABR07024473.2	0.171593	0.619039	0.159	0.077	1
Mypop	0.171617	0.800529	0.305	0.246	1
Avpi1	0.173984	0.569741	0.72	0.569	1
Letmd1	0.174221	0.585183	0.524	0.369	1
Tp53inp1	0.175477	0.500748	0.256	0.215	1
Ppp1r14c	0.176065	0.51406	0.476	0.354	1
Ctrl-Psmb10	0.176342	0.529529	0.61	0.523	1
Ttc27	0.179355	0.60665	0.451	0.323	1
Rfx3	0.18064	1.02649	0.122	0.092	1
Prdm2	0.180756	0.814185	0.61	0.492	1
Slc30a4	0.18176	0.626435	0.512	0.4	1
Vldlr	0.184619	0.946992	0.561	0.477	1
Ly75	0.184756	-0.71233	0.037	0.108	1
Ifngr1	0.184833	0.717726	0.183	0.108	1
AABR07019442.1	0.184905	0.618444	0.122	0.092	1
Brpf1	0.187035	0.543053	0.073	0.154	1
C330007P06Rik	0.188423	0.639063	0.329	0.246	1
Gpr150	0.189032	-0.516006	0.085	0.185	1
AABR07043271.1	0.191403	0.757386	0.159	0.123	1
Lims1	0.19313	0.616229	0.244	0.246	1
Lancl3	0.195144	0.515967	0.378	0.308	1
LOC102555217	0.195297	0.619039	0.171	0.154	1
LOC498265	0.196062	0.536165	0.049	0.185	1
Nnat	0.197371	0.76992	0.756	0.738	1
AABR07006476.1	0.198132	0.7	0.805	0.708	1
Il17d	0.201607	0.616626	0.146	0.169	1
Cep89	0.20208	0.841675	0.183	0.169	1
Crh	0.20477	0.608435	0.671	0.538	1
Endog	0.20505	-0.554566	0.366	0.369	1
Tex47	0.207779	0.621746	0.22	0.2	1
Mapk10	0.20892	0.504471	0.805	0.723	1
Hipk1	0.211568	-0.544168	0.622	0.569	1
Khdc4	0.212821	-0.507141	0.402	0.446	1
Strap	0.21297	0.587109	0.878	0.862	1
4930430F08Rik	0.213341	-0.517511	0.317	0.385	1
Dtnbp1	0.215857	0.601349	0.732	0.646	1
Fam222b	0.217137	0.918727	0.39	0.369	1
Ptcd2	0.217501	-0.699491	0.317	0.292	1
Zdhhc7	0.217536	-0.514264	0.329	0.385	1
Ipp	0.218539	-0.54152	0.317	0.338	1
Epha4	0.218748	0.527507	0.659	0.446	1
Atp13a1	0.220255	-0.520014	0.549	0.508	1
Mfap3l	0.220632	-0.648939	0.427	0.431	1
Prorp	0.220985	0.771412	0.317	0.231	1
Mmachc	0.22237	0.548227	0.171	0.123	1
Bud23	0.223407	-0.521343	0.354	0.369	1
Nfkb1	0.224097	0.643137	0.171	0.108	1
Pomk	0.225723	0.835929	0.512	0.431	1
9430015G10Rik	0.228089	0.636418	0.244	0.185	1
Decr2	0.229285	0.66957	0.195	0.123	1
Stk4	0.229664	0.513566	0.329	0.262	1
AABR07024439.1	0.230474	-0.632	0.268	0.308	1
Dis3l2	0.230938	-0.700898	0.293	0.338	1
Astn2	0.231999	0.53922	0.268	0.215	1
Mrm3	0.232548	0.767285	0.354	0.246	1
Gorab	0.234839	0.647145	0.134	0.277	1
Cpne4	0.23499	0.782899	0.256	0.169	1
2700097O09Rik	0.235615	0.715174	0.341	0.262	1
Sepsecs	0.242567	0.548207	0.5	0.338	1
Caprin2	0.244308	0.730735	0.512	0.462	1
Gabarap	0.247901	0.557807	0.915	0.892	1
Mterf2	0.248412	0.600577	0.183	0.123	1
LOC100359574	0.248414	0.731244	0.244	0.231	1
Usp32	0.249048	0.512738	0.829	0.723	1
Nup50	0.249858	-0.535445	0.512	0.508	1
Irs2	0.253834	0.719677	0.488	0.415	1
Coa7	0.258121	0.876036	0.183	0.169	1
Slc8a1	0.259852	0.568342	0.768	0.692	1
Galnt7	0.264511	0.706559	0.244	0.215	1
Celf5	0.268158	0.534295	0.72	0.615	1
Ado	0.269403	0.536609	0.378	0.323	1
Cst6	0.27289	0.664019	0.305	0.215	1
Sptlc3	0.273126	0.583105	0.183	0.154	1
Col11a1	0.274461	0.868471	0.244	0.2	1
Kif21b	0.275065	0.56421	0.768	0.708	1
Fam149b1	0.276787	0.861885	0.329	0.262	1
Usp42	0.277517	0.580119	0.537	0.523	1
Gemin2	0.277759	0.705542	0.183	0.185	1
Acbd3	0.280496	-0.533574	0.634	0.631	1
Noa1	0.281345	0.577762	0.366	0.354	1
Cstf2t	0.282435	0.759437	0.329	0.292	1
Gfm1	0.28249	0.780758	0.488	0.462	1
Ablim3	0.283955	0.550966	0.463	0.431	1
Slc12a6	0.284645	0.686203	0.671	0.6	1
Ggcx	0.286304	-0.656146	0.146	0.169	1
Gale	0.288277	0.545906	0.341	0.262	1
Rictor	0.28982	-0.596175	0.146	0.215	1
Olr352	0.292562	-0.820119	0.085	0.123	1
Ccdc138	0.292588	0.749584	0.244	0.2	1
Gmeb2	0.295811	-0.502418	0.098	0.169	1
Vip	0.298861	-1.11472	0.073	0.123	1
Cdr2l	0.299974	1.00979	0.22	0.169	1
Slc39a14	0.300897	0.647401	0.488	0.446	1
Nubpl	0.301165	0.587901	0.183	0.169	1
Chd8-Snord8	0.301773	-0.582737	0.085	0.108	1
Mafb	0.303133	0.601894	0.134	0.092	1
Cdc40	0.304571	0.507139	0.195	0.215	1
Tedc2	0.307644	0.522807	0.11	0.077	1
Chic2	0.309219	0.59112	0.159	0.154	1
Elof1	0.315139	0.598364	0.683	0.554	1
Tmem107	0.319946	0.538005	0.098	0.123	1
Shc2	0.322653	0.612215	0.476	0.446	1
AABR07025360.1	0.323512	-0.50918	0.098	0.123	1
Ano10	0.325703	0.576328	0.659	0.646	1
Zc3h7b	0.329802	0.593388	0.671	0.538	1
Rlf	0.331646	0.514138	0.451	0.415	1
Wtap	0.332207	0.540056	0.902	0.831	1
Atad5	0.338394	0.624906	0.207	0.154	1
Adck5	0.340502	0.583777	0.256	0.246	1
Pigb	0.342544	0.737407	0.159	0.169	1
Nedd4l	0.342647	0.507533	0.549	0.492	1
MGC95210	0.344484	-0.818381	0.122	0.169	1
Atpaf1	0.345379	0.647463	0.488	0.446	1
U2-026504	0.346887	-0.517838	0.073	0.108	1
U1-223764	0.348261	0.701236	0.61	0.631	1
Mpp1	0.351841	0.585113	0.634	0.615	1
Cttnbp2nl	0.353441	-0.528425	0.427	0.477	1
Chpt1	0.359576	0.593672	0.573	0.508	1
Klhl12	0.362566	0.52726	0.305	0.323	1
7SK-190996	0.365454	1.00195	0.146	0.154	1
AABR07034730.3	0.370438	0.502011	0.122	0.062	1
1810009A15Rik	0.37146	-0.652933	0.22	0.277	1
Crem	0.38145	0.653764	0.427	0.431	1
Ndc1	0.382745	0.748497	0.146	0.138	1
Smim11	0.382914	0.554888	0.415	0.369	1
Polq	0.385034	0.847376	0.122	0.077	1
Kdm2b	0.388813	0.785117	0.22	0.2	1
LOC365791	0.391664	0.66561	0.098	0.108	1
Arl13b	0.401093	0.526905	0.561	0.462	1
AABR07003933.1	0.401857	0.539067	0.22	0.185	1
Dld	0.402043	0.56793	0.927	0.969	1
Rapgef6	0.402439	0.869937	0.537	0.508	1
Dnhd1	0.404838	0.785155	0.085	0.123	1
Aldh7a1	0.406314	0.527734	0.744	0.692	1
Phtf1	0.40696	0.507933	0.585	0.508	1
Lrrc42	0.408586	-0.742126	0.317	0.277	1
Ttc9b	0.413422	0.511626	0.683	0.677	1
Nkain3	0.4174	0.541619	0.11	0.092	1
Eif4a3	0.419619	0.502137	0.72	0.631	1
Rps19bp1	0.430214	0.567326	0.854	0.785	1
Zdbf2	0.436787	0.62176	0.707	0.569	1
Tle4	0.436837	0.601397	0.134	0.123	1
Ccne2	0.439044	0.786816	0.5	0.446	1
Cdk5rap2	0.440908	0.661217	0.22	0.231	1
Mcf2l	0.442313	0.520115	0.695	0.615	1
Pde1c	0.443364	0.868987	0.146	0.154	1
Slc39a6	0.444566	0.545233	0.573	0.554	1
Cdh6	0.445384	0.90232	0.146	0.185	1
Ugcg	0.446524	0.565369	0.756	0.723	1
Lmf2	0.447077	1.0219	0.171	0.185	1
Apip	0.448627	0.551787	0.244	0.246	1
Nsa2	0.450218	0.531286	0.902	0.815	1
Ift52	0.450826	0.539116	0.573	0.446	1
Iqsec1	0.452822	0.511116	0.878	0.831	1
Cisd3	0.453336	0.573708	0.561	0.569	1
Hsdl1	0.454034	0.548189	0.622	0.631	1
Taf12	0.457791	-0.642965	0.329	0.354	1
Ppp1ca	0.46758	0.501365	0.939	0.877	1
Mogat1	0.467645	1.0768	0.11	0.169	1
Ascc1	0.472673	0.557067	0.451	0.415	1
Scrt1	0.474072	0.534146	0.159	0.154	1
Hsd17b7	0.47912	0.514882	0.646	0.523	1
Tmcc1-174086	0.483109	0.609094	0.207	0.231	1
Pde1a	0.484332	0.669216	0.122	0.138	1
Sgsm1	0.487342	-0.557937	0.549	0.508	1
Rras2	0.487708	0.56356	0.171	0.138	1
Tmem67	0.493424	0.56387	0.159	0.2	1
Rnls	0.497675	0.943067	0.232	0.246	1
Psma3l-Psma3	0.499381	0.522476	0.951	0.923	1
Mccc1-Dcun1d1	0.502675	0.528638	0.22	0.215	1
Dennd4a	0.507231	1.01199	0.256	0.323	1
Cp	0.507907	0.53384	0.122	0.092	1
Glce	0.5176	0.569504	0.293	0.277	1
Tctn1	0.534716	0.523058	0.122	0.108	1
Slc25a16	0.539527	0.573144	0.366	0.323	1
Bmt2	0.543548	0.714792	0.695	0.631	1
Ggact	0.551665	0.569137	0.195	0.246	1
Casp12	0.555425	0.559446	0.098	0.123	1
Rgl1	0.55733	0.52633	0.122	0.108	1
AABR07051207.1	0.561668	-0.66765	0.11	0.108	1
Rhbdd2	0.565888	0.540513	0.549	0.508	1
AABR07031931.1	0.566777	0.64251	0.122	0.108	1
Ddx6	0.569309	0.673487	0.415	0.523	1
0610010K14Rik	0.569486	0.5766	0.354	0.338	1
Klf9	0.570102	0.54621	0.354	0.292	1
Myh14	0.573031	0.560113	0.049	0.108	1
Tmed8	0.578011	0.639899	0.5	0.431	1
Eaf1	0.579542	0.52144	0.195	0.292	1
Numb	0.581978	0.512214	0.5	0.415	1
Cmtm4	0.59143	0.656789	0.427	0.431	1
Psd2	0.595267	0.55373	0.512	0.477	1
Eif2b3	0.597153	0.768516	0.427	0.385	1
LOC102552818	0.597457	0.51281	0.402	0.4	1
Ing5	0.599256	0.693147	0.159	0.169	1
Abhd14a	0.600233	-0.517169	0.207	0.231	1
Fen1	0.601393	0.680829	0.171	0.2	1
Xylt1	0.608143	0.503635	0.305	0.323	1
Herpud2	0.608176	0.667471	0.317	0.292	1
Cradd	0.618653	0.719677	0.207	0.2	1
Itga1-Pelo	0.619243	0.533575	0.366	0.415	1
R3hcc1l	0.626186	0.578598	0.183	0.231	1
Fkbp11-224739	0.626595	0.513305	0.305	0.292	1
Pik3c3	0.630208	0.50712	0.317	0.369	1
Chrna4	0.655435	0.507028	0.134	0.262	1
Pcdh18	0.658656	0.528706	0.195	0.169	1
Rrp1b	0.665669	0.502689	0.232	0.246	1
Kpna5	0.6671	0.864168	0.317	0.385	1
Thrap3	0.672497	0.768619	0.756	0.815	1
Bloc1s3	0.681466	0.575591	0.183	0.246	1
2610507B11Rik	0.685464	0.510976	0.549	0.6	1
1700088E04Rik	0.686046	0.768837	0.463	0.415	1
Cit	0.692623	-0.589418	0.683	0.538	1
St3gal5	0.697813	0.501523	0.695	0.662	1
Cabin1	0.707228	0.538858	0.354	0.415	1
Lypd6b	0.710808	0.844774	0.073	0.138	1
Errfi1	0.710875	0.641034	0.171	0.185	1
Rpf2	0.714898	0.507811	0.549	0.585	1
Ccnt2	0.723604	0.551628	0.78	0.708	1
Snx24	0.728249	0.711087	0.134	0.246	1
Nox1	0.742266	0.891386	0.122	0.169	1
Bcl2l2	0.750157	0.567707	0.683	0.585	1
Ccdc77	0.757801	0.517462	0.207	0.262	1
Yju2	0.760288	0.536398	0.183	0.185	1
Zswim5	0.762846	-0.603192	0.317	0.277	1
Ptpn2	0.76919	0.523616	0.305	0.338	1
Brf2	0.774886	0.562598	0.134	0.215	1
LOC691716	0.781058	0.584685	0.11	0.092	1
Pip4k2a	0.787766	0.515674	0.195	0.292	1
Itgb8	0.787844	0.709601	0.122	0.138	1
Ptn	0.793748	0.5751	0.829	0.831	1
Ppif	0.793951	0.531767	0.39	0.431	1
AABR07001942.1	0.803784	0.529134	0.122	0.169	1
Slc6a15	0.80932	0.547028	0.524	0.615	1
Ptger3	0.813544	0.508934	0.207	0.246	1
Smc1b	0.814337	0.71111	0.061	0.108	1
Prex2	0.818612	0.58327	0.317	0.308	1
Cep170	0.833588	0.594347	0.488	0.523	1
Xrcc4	0.833802	0.871243	0.146	0.2	1
Socs2	0.837443	0.593053	0.244	0.231	1
Cenpk	0.871037	0.587642	0.183	0.185	1
Abracl	0.871731	0.779269	0.488	0.431	1
Nt5dc1	0.879357	0.87366	0.146	0.215	1
Inpp4b	0.88083	0.604522	0.122	0.2	1
Nadk2	0.881621	0.514304	0.098	0.154	1
Vom2r53	0.889611	0.564955	0.061	0.108	1
Opcml-236226	0.890641	0.526469	0.134	0.154	1
Hpgds	0.914829	0.776129	0.122	0.138	1
Uprt	0.916703	0.518146	0.354	0.4	1
Hbp1	0.929528	0.624535	0.098	0.138	1
Ift122	0.936408	0.600171	0.11	0.154	1
Hltf	0.937543	0.584429	0.39	0.477	1
Fhit	0.941248	0.980691	0.195	0.246	1
Snx5	0.966808	0.563408	0.439	0.462	1
Mex3c	0.973116	0.552623	0.134	0.185	1
Chp1	0.977674	0.508443	0.402	0.508	1
Abca13	0.979449	0.801949	0.061	0.108	1
Plaa	0.979516	0.514512	0.768	0.754	1
Emsy	0.980065	0.502985	0.415	0.446	1
Fam76b	0.980441	0.745136	0.28	0.369	1
Slc9a8	0.982756	0.580079	0.415	0.431	1
Cdc25b	0.985999	0.505936	0.22	0.246	1
Trmu	0.990698	0.526198	0.171	0.277	1
Rps12	0.993175	0.67356	0.22	0.354	1
Mbd5	0.998766	0.83519	0.28	0.385	1

## Sheet: Dendrites_GABA2_vs_GABA3
Gene_Name	p-value	Avg_logFC	pct.GABAergic_2	pct.GABAergic_3	adj_p-value
Cnr1	7.84139e-07	-2.46621	0	0.556	0.00231948
Tubb2b	0.000943035	1.61608	0.333	0	1
Lmo4	0.00101096	-0.847298	0	0.278	1
Sox2	0.00101096	-1.98483	0	0.278	1
Sh3bgrl	0.00109386	-1.96507	0.033	0.333	1
Psmb5-AC109100.1	0.0010996	-2.52788	0.033	0.333	1
Olr1274-Rgs7bp-Olr1273-Olr1275-Olr1278-Olr1279-Olr1280	0.00353805	-1.06362	0.067	0.389	1
Kiaa0895l	0.00361681	-0.870828	0	0.222	1
Usp32	0.00361681	-1.09861	0	0.222	1
Slc39a11-Fam104a	0.00361681	-1.25276	0	0.222	1
Psmb2	0.00361681	-0.847298	0	0.222	1
Cep83	0.00361681	-0.870828	0	0.222	1
AABR07060833.1	0.00361681	-1.37231	0	0.222	1
Fyttd1	0.00361681	-0.870828	0	0.222	1
LOC102553298	0.00361681	-0.747214	0	0.222	1
Mrpl34	0.00361681	-0.798508	0	0.222	1
Dctn2	0.00361681	-0.798508	0	0.222	1
Shc3	0.00363248	1.35239	0.267	0	1
Cplx2	0.00640593	-0.825594	0.333	0.667	1
Ncoa4	0.00695994	0.587787	0.233	0	1
Mapk9	0.00695994	1.46634	0.233	0	1
Gng3	0.00695994	1.00552	0.233	0	1
Plppr4	0.00695994	1.22378	0.233	0	1
Cyc1	0.0072819	-2.31388	0.167	0.389	1
Tmem160	0.00750521	-1.27492	0.067	0.278	1
Gas7	0.00797732	-0.916291	0.067	0.389	1
Grm4-Mtch1	0.00843819	-1.76054	0.267	0.444	1
LOC100360087	0.00965252	-0.566395	0.1	0.389	1
Srsf2	0.00992455	-1.69196	0.033	0.222	1
Scand1	0.0117186	-0.798508	0.033	0.278	1
Lsm12	0.0122361	-1.04491	0.067	0.278	1
Fabp5	0.0123652	-1.47892	0.4	0.611	1
Pgam5-Pxmp2	0.0126045	-0.720546	0	0.167	1
Ostc	0.0126045	-0.747214	0	0.167	1
Jagn1	0.0126045	-0.747214	0	0.167	1
Pigp	0.0126045	-1.6946	0	0.167	1
Elavl2	0.0126045	-1.59826	0	0.167	1
Ralyl	0.0126045	-0.916291	0	0.167	1
Cd63	0.0126045	-0.93827	0	0.167	1
Narf	0.0126045	-0.980829	0	0.167	1
Ubn1	0.0126045	-1.06087	0	0.167	1
Appl1	0.0126045	-1.28402	0	0.167	1
Mrps7	0.0126045	-0.747214	0	0.167	1
Rrs1	0.0126045	-0.606136	0	0.167	1
Ube3c	0.0126045	-0.606136	0	0.167	1
Acsl1	0.0126045	-0.635989	0	0.167	1
Insyn1	0.0126045	-0.664976	0	0.167	1
Sgip1	0.0126045	-0.693147	0	0.167	1
Psma2	0.0126045	-0.798508	0	0.167	1
Vstm2a	0.0126045	-1.06087	0	0.167	1
Lrrc8b	0.0126045	-0.575364	0	0.167	1
Iars2	0.0126045	-0.916291	0	0.167	1
Mrpl10	0.0126045	-0.893818	0	0.167	1
Drap1	0.0126045	-1.00145	0	0.167	1
Psmd2	0.0126045	-0.635989	0	0.167	1
Trim37	0.0126045	-1.02165	0	0.167	1
H2afz	0.0131725	0.741937	0.2	0	1
Ndufs1	0.0131725	0.902868	0.2	0	1
MetazoaSRP-000757	0.0131725	0.569095	0.2	0	1
Nrip3	0.013706	-1.72969	0.1	0.389	1
Sumo3	0.0138743	-1.65155	0.033	0.222	1
Nrxn3	0.0145757	-1.12734	0.067	0.389	1
Cystm1	0.0154531	1.45739	0.267	0.056	1
Ywhag	0.0155711	1.43031	0.5	0.222	1
Tmem256	0.0160291	-1.17222	0.133	0.444	1
Calm3	0.0164172	-1.39866	0.7	0.889	1
Vat1	0.0170343	-0.542574	0.033	0.222	1
LOC685963	0.0171811	0.788457	0.567	0.278	1
Cox14	0.0181875	-0.894243	0.3	0.556	1
Arl4c	0.0200043	-1.25123	0.033	0.222	1
Ciao2b	0.0202293	-0.656008	0.033	0.222	1
Dynll2	0.0202979	-1.28589	0.3	0.667	1
Vapb	0.020405	-0.861028	0.033	0.222	1
Ube4b	0.0212715	-0.616186	0.033	0.278	1
LOC252890-Cox7c	0.0216273	0.995633	0.967	0.778	1
Atp5mc2	0.0216292	-1.05826	0.367	0.556	1
Wdr7	0.0230062	-0.628609	0.033	0.222	1
Dynlt3	0.023448	-1.41454	0.033	0.222	1
Luc7l3	0.0238923	-1.03967	0.067	0.222	1
Ndufs8	0.0240718	-1.4562	0.267	0.5	1
Ndufa3	0.024353	-0.807558	0.633	0.833	1
Sdhc	0.0245739	-0.935709	0.167	0.444	1
Ndufb6	0.0246996	-0.920205	0.267	0.444	1
Sars	0.0247109	0.725937	0.167	0	1
Mfap1a	0.0247109	0.693147	0.167	0	1
Srxn1	0.0247109	0.709676	0.167	0	1
Usp29	0.0247109	1.29015	0.167	0	1
Serp1	0.0247109	0.788457	0.167	0	1
Vps26a-Supv3l1	0.0247109	0.955511	0.167	0	1
Mindy2	0.0247109	1.34373	0.167	0	1
Mest	0.0247109	1.18377	0.167	0	1
Psmb1	0.0247109	1.4816	0.167	0	1
Celf2	0.0247109	1.45083	0.167	0	1
Mbd3	0.0247109	0.530628	0.167	0	1
Nars	0.0247109	0.530628	0.167	0	1
Ppm1e	0.0247109	0.550046	0.167	0	1
Atp5mc3	0.0248439	-0.719044	0.733	0.889	1
Cdc123	0.0258095	-1.15438	0.033	0.167	1
Gda	0.0271936	1.44881	0.433	0.167	1
Ss18l2	0.0279424	-0.887303	0.033	0.278	1
Rnf10	0.0279798	-1.58277	0.1	0.278	1
AABR07072748.2	0.0283267	-1.01393	0.3	0.444	1
Cck	0.0294328	-1.04982	0.067	0.222	1
Klhl13	0.0305196	-0.840305	0.033	0.333	1
Ddx17	0.0305317	-0.988861	0.033	0.167	1
Oaz2	0.0306947	-1.3419	0.167	0.389	1
Nme3	0.0317912	-1.70393	0.067	0.222	1
Ppp1r1a	0.0322153	-0.714425	0.033	0.167	1
Elavl3	0.0322757	-0.541597	0.067	0.222	1
Ndufb8	0.0333018	-0.587518	0.733	0.944	1
Sgtb	0.0356863	-1.53373	0.033	0.167	1
Zwint	0.0359675	-1.21868	0.567	0.722	1
Jakmip1	0.0383244	-0.998529	0.067	0.222	1
Ndufs5	0.0383942	-0.62477	0.2	0.444	1
Cdk11b	0.0393165	-0.693147	0.033	0.222	1
Dpysl2	0.0404618	-1.22867	0.267	0.389	1
Snrnp35	0.0406305	-1.83901	0.033	0.167	1
App	0.0425268	0.897942	0.3	0.056	1
Pafah1b3	0.043249	-0.968659	0.033	0.167	1
Prps1	0.0436579	-1.96944	0	0.111	1
Plekha3	0.0436579	-0.870828	0	0.111	1
Mras	0.0436579	-0.664976	0	0.111	1
Mbd2	0.0436579	-1.51635	0	0.111	1
Mrpl42	0.0436579	-0.693147	0	0.111	1
Nebl	0.0436579	-0.606136	0	0.111	1
Dnajc6	0.0436579	-0.747214	0	0.111	1
Cox20	0.0436579	-0.510826	0	0.111	1
Hpca	0.0436579	-1.41369	0	0.111	1
Bloc1s2	0.0436579	-0.720546	0	0.111	1
Thoc3	0.0436579	-0.606136	0	0.111	1
Ubxn6	0.0436579	-0.720546	0	0.111	1
Dbn1	0.0436579	-0.747214	0	0.111	1
Pacs2	0.0436579	-1.11696	0	0.111	1
Emc2	0.0436579	-0.798508	0	0.111	1
Mmut	0.0436579	-0.847298	0	0.111	1
Smg1	0.0436579	-1.07992	0	0.111	1
Tm2d2	0.0436579	-1.60944	0	0.111	1
Usp46	0.0436579	-0.916291	0	0.111	1
Tcf20	0.0436579	-0.635989	0	0.111	1
Zcrb1	0.0436579	-0.720546	0	0.111	1
Gucy1a1-Gucy1b1	0.0436579	-0.916291	0	0.111	1
Ubxn1	0.0436579	-1.45343	0	0.111	1
Gng4	0.0436579	-0.693147	0	0.111	1
Aasdhppt	0.0436579	-0.747214	0	0.111	1
Susd4	0.0436579	-1.2205	0	0.111	1
9930021J03Rik	0.0436579	-1.46634	0	0.111	1
2020-03-05	0.0436579	-0.635989	0	0.111	1
Tmem42	0.0436579	-0.635989	0	0.111	1
Fem1a	0.0436579	-1.77307	0	0.111	1
Clptm1l	0.0436579	-1.40009	0	0.111	1
Mrpl35	0.0436579	-0.870828	0	0.111	1
Ralgapa1	0.0436579	-1.49165	0	0.111	1
Atp5f1d	0.0438445	-1.1851	0.7	0.833	1
Zranb1	0.0442038	-1.13728	0.033	0.167	1
Nenf	0.0451075	0.875469	0.2	0.056	1
Mtpn	0.0453072	-0.77909	0.1	0.333	1
Otud6b	0.0458954	-0.873731	0.033	0.167	1
Rgs2	0.0461589	0.81831	0.133	0	1
Rdh14	0.0461589	0.788457	0.133	0	1
Ptprt	0.0461589	0.81831	0.133	0	1
Nt5dc3	0.0461589	1.06471	0.133	0	1
Nrbp2	0.0461589	0.902868	0.133	0	1
Csnk2b	0.0461589	0.606136	0.133	0	1
Frrs1l	0.0461589	1.02962	0.133	0	1
Kpna1	0.0461589	1.19392	0.133	0	1
Caskin1	0.0461589	1.335	0.133	0	1
Ankrd46	0.0461589	0.980829	0.133	0	1
Cul3	0.0461589	0.955511	0.133	0	1
AABR07037520.1	0.0461589	1.90707	0.133	0	1
Pmpca	0.0461589	0.693147	0.133	0	1
Ddb1	0.0461589	1.35239	0.133	0	1
Lpgat1	0.0461589	0.624154	0.133	0	1
Elfn2	0.0461589	0.510826	0.133	0	1
Prmt8	0.0461589	0.757686	0.133	0	1
B3gat3	0.0461589	0.530628	0.133	0	1
Dync1li1	0.0461589	0.587787	0.133	0	1
Rpl5	0.0461589	0.606136	0.133	0	1
Atf2	0.0461589	0.803495	0.133	0	1
Usp9x	0.0461589	0.803495	0.133	0	1
Rab6b	0.0464821	-0.787384	0.667	0.833	1
Ssr4	0.0497193	-0.733969	0.033	0.167	1
Got2	0.0497679	1.49065	0.3	0.111	1
Elmo1	0.0499327	-0.885519	0.033	0.167	1
Sec62	0.050647	-0.93464	0.1	0.222	1
Rufy3	0.0509941	-0.90029	0.067	0.278	1
Pam	0.0513612	0.888541	0.2	0.056	1
Yaf2	0.0517532	-0.847298	0.067	0.222	1
Coa3	0.051802	-0.660357	0.033	0.167	1
Ctnnd2	0.0522054	-1.18916	0.033	0.167	1
Mef2a	0.0523184	-0.884339	0.1	0.333	1
Sult4a1	0.0523678	-1.54045	0.333	0.389	1
Cnrip1	0.0533562	-0.782759	0.067	0.167	1
Mkks	0.0536471	-0.829279	0.033	0.167	1
Ap2m1	0.0542352	-0.582651	0.267	0.444	1
Paf1	0.0543089	-0.644357	0.067	0.222	1
Mrps34	0.0544673	-0.873731	0.033	0.167	1
Pcp4	0.054775	-0.510826	0.333	0.556	1
Selenoi	0.055139	-0.952658	0.067	0.222	1
Dnajc27	0.0554657	-0.664976	0.033	0.222	1
Ppp3ca	0.055494	1.09861	0.2	0.056	1
Mrpl57	0.056964	-0.861028	0.033	0.167	1
Tmem178b	0.0574276	-1.23539	0.1	0.389	1
Stx4	0.0579111	-0.510826	0.033	0.167	1
Mcts1	0.0581144	1.22083	0.233	0.056	1
Zfp771	0.0583207	1.15986	0.2	0.056	1
Ube2j1	0.0587232	-1.21527	0.067	0.222	1
Cdk5r1-Rnf135	0.0592383	1.82915	0.233	0.111	1
Suclg1	0.0601222	0.924259	0.233	0.111	1
Gnao1	0.0605818	-0.947253	0.233	0.389	1
Uhmk1	0.0605868	-1.28565	0.1	0.278	1
Atp6v1e1	0.0609024	-1.49909	0.267	0.389	1
Atp5mf-Zfp394	0.0616697	-0.510826	0.6	0.778	1
Tceal5	0.0621797	0.698135	0.233	0.111	1
Eef1b2	0.0622027	-0.967584	0.033	0.222	1
Sod1	0.0624234	-0.994392	0.6	0.667	1
Slc25a39	0.0624511	-0.768655	0.067	0.222	1
AC095947.1	0.0625068	-0.621174	0.267	0.444	1
Hsd17b12	0.0627827	-1.07044	0.033	0.167	1
LOC306766	0.062826	-0.805065	0.067	0.222	1
Hmgcs1	0.0636933	0.63908	0.2	0.056	1
Bsg	0.0637325	0.819588	0.3	0.167	1
Cacnb3	0.064409	-0.896488	0.033	0.222	1
Rps28	0.0648041	-0.590868	0.133	0.333	1
Polr2f	0.0649207	0.914183	0.2	0.056	1
Ndufa2	0.0656871	-0.564251	0.6	0.722	1
Mpc2	0.0659428	1.26951	0.4	0.111	1
Map7d2	0.0662814	-1.02808	0.1	0.278	1
Txn1	0.0664859	-0.510826	0.1	0.333	1
Atp6v1f	0.0665118	-1.00126	0.367	0.5	1
Dhx29	0.0674509	-1.71792	0.067	0.167	1
Ube2e3	0.0677508	-0.67788	0.033	0.167	1
Atp5po	0.0680371	0.88939	0.833	0.611	1
AC109958.1	0.0681992	-0.647401	0.033	0.222	1
Dhcr24	0.0715612	-0.916291	0.033	0.167	1
Eid1	0.0718204	-0.595383	0.1	0.222	1
Rnf146	0.0725173	-1.81256	0.033	0.167	1
Sec61g	0.0731072	-0.709277	0.133	0.333	1
Ctsb	0.0741526	-0.751988	0.067	0.167	1
Churc1	0.0745042	-0.798508	0.067	0.222	1
Fam19a5	0.0747185	-0.855666	0.033	0.167	1
Arf1	0.0750357	1.06962	0.267	0.111	1
Psmd13	0.0759171	-0.648027	0.033	0.167	1
Ap3d1	0.0765528	0.821402	0.167	0.056	1
Atp6v1h	0.0775116	-0.916291	0.067	0.278	1
Fnbp1l	0.0787843	-0.937344	0.033	0.222	1
Cetn2	0.0790748	1.08803	0.167	0.056	1
Btbd3	0.0791093	1.63849	0.167	0.056	1
Iqsec3	0.0799056	-1.22807	0.033	0.167	1
Glrx5	0.0799888	-0.829279	0.067	0.222	1
Nap1l1	0.0805135	-1.00484	0.033	0.167	1
Ap1s1	0.0828684	-0.625236	0.067	0.167	1
Cox5a	0.0843139	-0.862587	0.333	0.5	1
Eea1	0.0848271	-1.02808	0.033	0.111	1
Zfp318	0.0851285	-1.50508	0.067	0.167	1
Atp8a2	0.0857218	-0.658462	0.067	0.222	1
Fxn	0.0857573	-0.745665	0.067	0.167	1
Mysm1	0.0864141	-0.7404	0.033	0.111	1
Uqcrfs1	0.0865997	-0.836248	0.233	0.389	1
Atp6v1g2-RT1-CE14	0.0868261	-2.17813	0.167	0.278	1
Taok1	0.0870376	-0.533815	0.1	0.333	1
Atp1b1	0.087523	-0.536578	0.6	0.778	1
Herc2	0.089033	-0.977445	0.033	0.167	1
Abcd3	0.0890697	-0.631454	0.067	0.278	1
Pja1	0.0895261	-0.698037	0.067	0.167	1
Foxn3	0.090036	-0.785262	0.067	0.278	1
B3gat1	0.0933419	-0.990399	0.067	0.222	1
Hdac5	0.094852	-0.698037	0.1	0.167	1
Agpat1	0.0949041	0.552069	0.167	0.056	1
Rpl27	0.0951646	-0.572701	0.133	0.333	1
Arl3	0.0961011	-0.698037	0.067	0.167	1
Aip	0.0961391	-0.861028	0.033	0.111	1
Gfod1	0.0961391	-0.861028	0.033	0.111	1
Stox2-AABR07025757.1	0.0963548	-0.838039	0.033	0.111	1
Hspa5	0.097104	1.22687	0.167	0.056	1
Ankrd11	0.0974236	-0.580784	0.133	0.333	1
Lcmt1	0.0978894	-0.542574	0.033	0.111	1
Smap2	0.0978894	-0.542574	0.033	0.111	1
Tuba1a	0.0988524	0.687513	0.867	0.889	1
Rps3	0.0991021	-0.967584	0.3	0.444	1
Sirt3	0.0992462	-0.510826	0.033	0.111	1
Abi1	0.0992571	-0.632186	0.033	0.111	1
Ica1	0.0992571	-0.632186	0.033	0.111	1
Rab6a	0.0992943	-0.57093	0.4	0.611	1
Rplp0	0.0999273	-0.846627	0.3	0.556	1
Atp6v0b	0.100569	-0.625236	0.067	0.167	1
Ptprn	0.101253	0.655609	0.167	0.056	1
Clasp2	0.101724	-1.17412	0.1	0.278	1
LOC102551133	0.102213	-0.819127	0.033	0.167	1
Pdxk	0.102448	-1.36258	0.033	0.111	1
Nova1	0.103516	-0.77909	0.1	0.222	1
Rpl22	0.103631	-0.583146	0.1	0.222	1
Rps7	0.104322	1.00247	0.3	0.222	1
Tubb5	0.104466	0.856777	0.333	0.222	1
Cort	0.104759	1.08803	0.167	0.056	1
Srebf2	0.105446	-0.687756	0.033	0.111	1
Pnpla8	0.106179	1.72988	0.167	0.056	1
Ppp1r16b.2	0.106339	-0.632186	0.033	0.111	1
Denr	0.106888	-0.603199	0.033	0.111	1
Ash1l	0.107172	-0.689517	0.1	0.222	1
Caprin1	0.107379	-1.03407	0.033	0.111	1
Smim7	0.107456	-0.673345	0.067	0.167	1
Fam168a	0.107753	-1.70296	0.033	0.167	1
Selenom	0.108921	1.4207	0.4	0.278	1
Nme2	0.109074	-0.594207	0.567	0.611	1
LOC288913	0.10961	-0.616186	0.1	0.222	1
Glg1	0.110225	-1.35161	0.067	0.222	1
Tomm7	0.111515	-0.729079	0.433	0.611	1
Akap11	0.112268	-0.731613	0.2	0.278	1
Ccdc88a	0.113616	-1.67059	0.067	0.167	1
Nceh1	0.113678	-0.851752	0.033	0.111	1
Zer1	0.114017	-1.13943	0.033	0.111	1
Pycr1	0.115347	-2.02387	0.067	0.167	1
LOC689574	0.115822	-1.07044	0.067	0.167	1
Hipk2	0.117233	-0.883501	0.033	0.111	1
Mrps36	0.117247	-0.648027	0.033	0.167	1
Pfdn2	0.117812	-0.74444	0.033	0.167	1
Pdap1	0.119402	-0.693147	0.133	0.222	1
Psma7	0.120009	-1.17412	0.433	0.5	1
Slc5a6	0.120428	-1.11217	0.067	0.278	1
Dpf1	0.121241	-0.573346	0.033	0.111	1
Ddt-Gstt3	0.122138	0.791699	0.267	0.111	1
Myl6	0.122568	1.24342	0.767	0.667	1
Slc30a9	0.12296	0.756122	0.167	0.056	1
Psip1	0.12363	0.655609	0.133	0.056	1
Sv2a	0.123723	-1.23296	0.133	0.278	1
Sem1	0.124217	1.69311	0.367	0.167	1
LOC100911177	0.127194	0.795426	0.233	0.056	1
Eef1e1-Bloc1s5	0.127196	-0.510826	0.067	0.167	1
Pacsin1	0.127457	-0.57145	0.033	0.167	1
Cryzl1	0.128516	-0.83933	0.033	0.167	1
Rps21	0.128646	0.863493	0.233	0.111	1
Pgp	0.129412	0.918028	0.233	0.111	1
Msl1	0.129425	-1.2174	0.067	0.167	1
Bola3	0.130299	-0.700068	0.067	0.222	1
Rgs17	0.132633	-0.708651	0.033	0.111	1
Ap3s2	0.133348	-0.57145	0.033	0.111	1
Vdac3	0.133782	-0.531028	0.1	0.278	1
Taldo1	0.134969	-0.902868	0.167	0.278	1
Dzank1	0.136559	-1.05879	0.1	0.222	1
Mrpl55	0.136857	-0.8702	0.1	0.167	1
1110008P14Rik	0.138076	-0.709676	0.2	0.333	1
Nfib-190674	0.138917	-0.536801	0.067	0.222	1
Npm1	0.13947	1.01064	0.167	0.056	1
Opcml-236228	0.139849	-0.708651	0.067	0.111	1
Oxr1	0.141075	-0.911952	0.133	0.278	1
Tmem59l	0.141194	-0.791728	0.033	0.167	1
Rgs10	0.142122	0.749428	0.133	0.056	1
Tub	0.142311	-1.10735	0.033	0.167	1
Impact	0.14303	-0.684097	0.067	0.167	1
Bmi1-Commd3	0.143547	-1.1116	0.033	0.111	1
Clcn3	0.143636	-0.622051	0.067	0.167	1
Fkbp2	0.144864	-0.566395	0.1	0.167	1
Eif3j	0.145382	-0.847298	0.1	0.222	1
Myo5a	0.145543	0.654681	0.433	0.222	1
Gabrg2	0.146064	-0.57145	0.033	0.111	1
Tet1	0.146604	-0.873731	0.033	0.111	1
Eif4a2	0.147919	-0.541597	0.033	0.111	1
Gabrb3	0.148167	-0.916291	0.033	0.167	1
Rangap1	0.148296	-1.08417	0.033	0.111	1
Ndufv2	0.148335	-0.939821	0.2	0.278	1
Timm17a	0.148498	-0.57145	0.067	0.111	1
Gbf1	0.149731	-0.926986	0.033	0.111	1
Mrpl45	0.151336	-0.708651	0.033	0.111	1
Ndufv3-148199	0.152945	-0.776529	0.267	0.5	1
Coa6	0.154249	-0.576784	0.033	0.222	1
Npr3	0.154528	-0.628609	0.033	0.111	1
Psmd8	0.155329	-0.648027	0.067	0.167	1
Ptpre	0.155646	-0.573346	0.033	0.111	1
Atp6v1b2	0.155797	1.20796	0.467	0.222	1
Klc1	0.155814	-0.885519	0.267	0.389	1
Hspe1	0.155824	-0.510826	0.167	0.333	1
Dact3	0.157686	-0.599773	0.1	0.222	1
Tspan17	0.157961	-0.567984	0.067	0.167	1
Atxn10	0.158046	-0.759722	0.1	0.222	1
Canx	0.158144	1.81773	0.133	0.056	1
Ndufa10l1	0.158491	-0.63444	0.1	0.222	1
Zfp532	0.159261	0.71295	0.167	0.056	1
Kcnd2	0.159294	-0.739667	0.033	0.167	1
Git1	0.159666	-0.867501	0.067	0.167	1
Chd4	0.160502	-0.885519	0.067	0.111	1
Rex1bd	0.162094	1.50725	0.167	0.056	1
Tspan7	0.163718	-1.37432	0.033	0.111	1
Fryl	0.164257	-0.768655	0.033	0.111	1
Cyp3a2-Arpc1a	0.164538	0.802898	0.2	0.056	1
Mrps18a	0.164933	2.0464	0.133	0.056	1
Nsmf	0.165385	1.36098	0.3	0.111	1
Bap1	0.165395	0.60158	0.233	0.111	1
Peg3	0.166011	-0.531028	0.167	0.278	1
BC031181	0.167672	-1.12109	0.133	0.167	1
LOC102549726-RT1-CE14	0.168457	1.1987	0.133	0.056	1
Gaa	0.169359	0.703618	0.133	0.056	1
Ddx3x	0.170429	0.727549	0.133	0.056	1
Ndufs2	0.171574	-1.07278	0.2	0.389	1
Prdx2	0.17207	-0.863647	0.567	0.611	1
Aars	0.17247	-0.792238	0.067	0.167	1
Birc6	0.172947	-0.57145	0.067	0.111	1
Pkp4	0.173241	-0.841067	0.067	0.222	1
Hsp90ab1	0.176211	0.868868	0.733	0.556	1
Mef2c	0.176773	0.580182	0.333	0.167	1
AC141489.1	0.179859	1.03108	0.633	0.556	1
Klhdc3	0.179872	-1.36524	0.033	0.111	1
Ptpra	0.18052	-0.93691	0.067	0.111	1
GL.12850	0.181206	-1.42139	0.1	0.111	1
Cmip	0.181261	-0.865647	0.133	0.222	1
Tomm22	0.183425	1.39341	0.133	0.111	1
Znrf1	0.183863	0.646627	0.167	0.056	1
Cox6b1-004303	0.184333	0.718407	0.6	0.5	1
Araf	0.184423	-0.755279	0.167	0.278	1
Nedd4	0.185074	1.44186	0.133	0.056	1
Wasf3	0.185134	-0.882389	0.067	0.167	1
Chchd1	0.185155	-0.926341	0.267	0.278	1
Dlgap4	0.185222	-1.02704	0.033	0.111	1
Rpl13a	0.185861	-0.586812	0.2	0.222	1
Rexo2	0.187869	-0.637577	0.1	0.167	1
Limk1	0.188187	1.67523	0.133	0.111	1
Dynll1	0.190698	-0.940388	0.133	0.222	1
Psma3l-Psma3	0.19093	-0.655407	0.033	0.167	1
Lbh	0.193368	-0.722135	0.2	0.389	1
Arhgap20	0.194286	-0.733969	0.033	0.167	1
Usp3	0.194781	-0.597837	0.033	0.111	1
Tcf25	0.195303	-0.953678	0.433	0.444	1
Sdha	0.195332	-1.4148	0.133	0.278	1
Sst	0.198288	0.518794	0.167	0.056	1
Nomo1	0.198745	-1.27297	0.033	0.167	1
Pitpna	0.199402	1.38437	0.2	0.111	1
Pfdn5	0.20355	0.916291	0.167	0.056	1
Mgll	0.203673	-0.701881	0.233	0.333	1
Id2	0.204366	-0.916291	0.1	0.167	1
Mrpl51	0.204591	-1.75052	0.067	0.111	1
Atp5pd	0.20477	0.784814	0.733	0.611	1
Diras1	0.204866	0.967842	0.233	0.222	1
H2afy	0.205106	-0.539813	0.033	0.111	1
Adgrl1	0.205252	-1.22378	0.133	0.278	1
Ptpn4	0.205312	-1.40584	0.067	0.111	1
Rac1	0.207915	-1.03584	0.067	0.167	1
LOC100910827	0.208327	0.890973	0.4	0.278	1
Pgls	0.210451	-0.87294	0.067	0.167	1
Wdr83os	0.213188	-1.19037	0.067	0.111	1
Mtif2	0.215799	-0.651904	0.033	0.111	1
Syt11	0.216489	0.884052	0.233	0.111	1
Slc32a1	0.217684	-0.576784	0.1	0.222	1
Cdk13	0.221216	-0.600438	0.033	0.111	1
Bsn-AC128059.4	0.222118	-0.569666	0.033	0.111	1
Gtf2h5	0.222185	0.875469	0.233	0.111	1
Serf2	0.224652	0.659246	0.467	0.333	1
Atp6v1g1-Tmem268	0.225551	-0.562498	0.267	0.389	1
Pja2	0.225639	0.777029	0.2	0.111	1
Dld	0.228594	1.47431	0.167	0.111	1
Eif5a	0.228596	0.875469	0.133	0.056	1
Rgs12	0.229051	0.587787	0.133	0.056	1
Hist3h2ba	0.229895	0.703618	0.133	0.056	1
Myh10	0.231481	-1.10553	0.1	0.167	1
Sdhb	0.235692	-1.50508	0.1	0.111	1
Ndufs4	0.235907	0.993252	0.2	0.167	1
Msrb2	0.23724	-0.682676	0.067	0.111	1
Pnkd-249879	0.237997	-0.595383	0.067	0.167	1
Lage3-Ubl4a	0.23972	1.30833	0.267	0.167	1
Fdx2	0.239952	-0.93928	0.033	0.111	1
Gria4	0.241012	-0.628609	0.067	0.111	1
Ywhaz	0.241932	0.663294	0.333	0.167	1
Psap	0.244372	0.826679	0.167	0.167	1
Pitpnm1	0.244684	1.53687	0.133	0.056	1
Lnc134	0.247106	-1.58591	0.033	0.111	1
Trnp1	0.247114	0.683097	0.133	0.056	1
Thy1	0.247517	-0.578267	0.167	0.222	1
Atox1	0.248743	0.572161	0.433	0.222	1
Auh	0.248744	-0.640879	0.067	0.111	1
Tpm3	0.250415	1.29863	0.167	0.056	1
Pcdh11x	0.254813	0.635133	0.233	0.056	1
Hsp90b1-AABR07056495.1	0.254907	1.00552	0.133	0.056	1
Mrpl23	0.255348	-0.8172	0.067	0.167	1
Rab3a	0.256279	-0.784632	0.433	0.444	1
Dpm2	0.25776	-0.601797	0.1	0.167	1
St8sia3	0.258363	-0.728549	0.067	0.167	1
Fkbp3	0.258616	-0.575364	0.133	0.222	1
Ppp1cb	0.260949	-0.969133	0.067	0.167	1
Rnf5-C4a-Stk19	0.261681	-1.80751	0.033	0.111	1
Dpcd	0.262283	-0.718465	0.133	0.167	1
Rab5b	0.263428	0.604316	0.133	0.056	1
Ggnbp2	0.264048	-0.759287	0.067	0.111	1
Kif5b	0.264164	1.47998	0.3	0.278	1
Lhfpl5	0.268004	-0.733969	0.067	0.111	1
LOC100912227	0.268222	0.764717	0.467	0.222	1
Prrc2b	0.268407	-0.798508	0.033	0.167	1
Slc22a17	0.2691	0.530628	0.167	0.056	1
Cfap36	0.271706	-0.559616	0.033	0.111	1
Ppp2r2d	0.272839	-0.688507	0.067	0.111	1
Pcnp	0.274836	-0.931676	0.167	0.278	1
Celf4	0.276712	-0.587199	0.133	0.222	1
Ndufs3-Ptpmt1	0.277723	-1.04065	0.167	0.222	1
Bnip3l	0.278182	-0.674455	0.133	0.167	1
Aco2	0.278273	1.12271	0.467	0.389	1
Ppm1h	0.278998	1.16315	0.167	0.111	1
Slc25a11	0.279411	-0.813106	0.167	0.222	1
Zfp706	0.279797	-0.906138	0.067	0.111	1
Mrpl15	0.281056	-0.545312	0.1	0.222	1
Ppp2r2b	0.281356	-0.656537	0.133	0.222	1
Ppfia3	0.281601	-1.28589	0.067	0.111	1
Gmps	0.282916	-1.53834	0.067	0.111	1
Hdgf	0.283536	0.735707	0.2	0.111	1
Ccng1	0.285107	0.649345	0.167	0.111	1
Scn3a	0.290481	0.804851	0.133	0.056	1
Arpc5	0.290598	0.518794	0.133	0.056	1
Nifk	0.291992	-0.745665	0.033	0.111	1
Gpi	0.292224	-0.822262	0.167	0.222	1
Pdlim7	0.29593	0.536493	0.133	0.111	1
Slc6a17	0.297232	-0.510826	0.033	0.111	1
Srpk2	0.300467	-0.536801	0.1	0.167	1
Fkbp1a	0.301374	-0.679902	0.333	0.389	1
Fam49a	0.301422	-0.531879	0.133	0.222	1
Spcs2	0.302551	1.10727	0.133	0.111	1
Hes6	0.303405	0.602825	0.133	0.056	1
Ipo11	0.304551	-0.622051	0.033	0.111	1
Atp5f1a	0.305757	0.983682	0.3	0.167	1
Tulp4	0.305786	-0.755948	0.133	0.111	1
Sod2	0.307104	0.796331	0.167	0.167	1
Fam168b	0.309263	-0.586812	0.033	0.111	1
Idh3B	0.310051	0.667829	0.233	0.111	1
Dhx36	0.31122	-0.567984	0.033	0.111	1
Mllt11	0.311319	1.36463	0.333	0.167	1
Glrx	0.312495	-0.562119	0.033	0.111	1
Rpl23a	0.313431	0.554726	0.533	0.5	1
Ddx25	0.314482	1.7872	0.133	0.111	1
Rab7b	0.315628	-1.57372	0.033	0.111	1
Mpc1	0.31692	0.884052	0.2	0.167	1
Apoo	0.317648	-0.631454	0.067	0.111	1
Smarca2	0.319157	0.543335	0.2	0.111	1
Oxa1l	0.32211	-1.3548	0.133	0.167	1
Nav3	0.32267	-0.975131	0.067	0.111	1
Sos2-207693	0.323439	-0.952658	0.033	0.111	1
Cox6a2	0.323828	0.643667	0.2	0.111	1
mrpl24	0.325621	-0.584934	0.067	0.111	1
Kdm5a	0.326208	0.735111	0.133	0.111	1
Son	0.326981	0.886768	0.133	0.111	1
Rpl19-AC135443.1	0.32704	0.920931	0.4	0.333	1
Grin2b	0.327785	0.603535	0.133	0.111	1
Cox7a2l	0.329404	1.67625	0.3	0.278	1
Coa5	0.32997	0.553885	0.133	0.056	1
Atp5pf	0.330981	-0.848939	0.533	0.556	1
Map1lc3b	0.331478	1.31372	0.133	0.056	1
Senp6	0.331944	1.05635	0.133	0.056	1
Ran	0.333306	1.01906	0.267	0.111	1
Mapre1	0.33388	-0.713766	0.067	0.111	1
Xkr6	0.336315	-0.869459	0.1	0.167	1
Egln2	0.338963	-0.722135	0.067	0.111	1
Kif5c	0.339284	-0.90683	0.767	0.667	1
Wdr26	0.339555	1.60302	0.133	0.056	1
Psmg3	0.341444	-0.61163	0.1	0.167	1
Bhlhb9-Gprasp1	0.342298	1.22829	0.133	0.111	1
Acot7	0.343765	1.03731	0.267	0.167	1
Vps29	0.343947	-0.510826	0.067	0.111	1
Eif1b	0.344164	-0.544727	0.067	0.167	1
Tmed2	0.345609	-1.123	0.1	0.167	1
Prxl2a	0.345871	-0.76214	0.067	0.111	1
Vps41	0.346054	-0.538997	0.033	0.111	1
Fbxw11	0.34818	0.697486	0.167	0.056	1
Fam20c	0.349757	-0.688507	0.033	0.111	1
Sdcbp	0.349944	-0.524071	0.067	0.167	1
Arl8a	0.350114	-0.795213	0.133	0.222	1
Minos1	0.352634	-0.500875	0.267	0.333	1
Hspa13	0.352999	-0.672094	0.067	0.111	1
LOC100363521	0.35975	-0.578267	0.067	0.167	1
Washc3	0.359861	-0.625895	0.067	0.111	1
Lgi2	0.361522	-0.543978	0.433	0.444	1
Hspa4l	0.361524	-0.802962	0.067	0.167	1
Gpm6a	0.361711	0.821724	0.3	0.167	1
Prkacb	0.367577	0.602825	0.133	0.056	1
Ube2d3	0.368915	-1.13445	0.133	0.167	1
Ercc1	0.37119	-0.606136	0.067	0.111	1
Gadd45gip1	0.375775	0.571786	0.133	0.167	1
Jund	0.382103	0.631272	0.267	0.222	1
AABR07057675.1	0.383868	-0.588787	0.033	0.111	1
Ank2.1	0.384558	-0.532487	0.367	0.5	1
Mrpl21	0.384972	0.839101	0.167	0.111	1
Mrpl52	0.385895	0.888208	0.167	0.167	1
Cpe	0.391827	0.547295	0.167	0.111	1
Glyr1	0.392887	-0.788457	0.067	0.111	1
Fam171b	0.393733	1.12678	0.1	0.111	1
2510009E07Rik	0.394475	0.788457	0.133	0.056	1
Psma1	0.39716	0.748129	0.133	0.111	1
Camk2b	0.397436	0.560758	0.133	0.056	1
LOC691807	0.402438	-0.681451	0.133	0.167	1
Mdh1	0.404698	-0.677147	0.433	0.444	1
Napb	0.404922	0.660107	0.3	0.222	1
Rcan2	0.405249	-0.890315	0.067	0.111	1
Palm2	0.406779	-1.10389	0.1	0.111	1
Sec11c	0.408788	0.746257	0.233	0.167	1
Spag9	0.40896	1.14058	0.133	0.167	1
Immt	0.412657	0.904456	0.133	0.056	1
Gigyf2-250012	0.413299	0.545227	0.133	0.056	1
Aprt	0.417336	0.689139	0.133	0.111	1
Trim2	0.421341	0.718626	0.133	0.056	1
Ensa	0.424122	0.803813	0.333	0.333	1
Dab1	0.426906	-0.661108	0.1	0.111	1
Ppp1r9b	0.426996	0.884685	0.167	0.111	1
Bod1l1	0.42742	-0.583146	0.067	0.111	1
Anxa7	0.428254	-0.948448	0.067	0.111	1
Fbxl16	0.428438	-0.531028	0.133	0.167	1
Ddx46	0.428816	-1.04878	0.067	0.111	1
Clpb	0.428846	1.61557	0.133	0.056	1
Calr	0.429742	0.632738	0.033	0.278	1
Mrps24	0.429991	1.89583	0.133	0.056	1
Ckb	0.43249	0.77783	0.433	0.444	1
Oxct1	0.435065	1.82769	0.333	0.278	1
Dgkz	0.435557	1.27366	0.1	0.111	1
Ubac1	0.438854	0.856777	0.133	0.111	1
Serp2	0.442098	1.09861	0.167	0.278	1
Prkar1b	0.444359	0.673729	0.167	0.111	1
Abr	0.445399	0.984668	0.133	0.111	1
Cisd1	0.445823	-0.612791	0.467	0.556	1
Nipa1	0.446292	-0.641446	0.133	0.167	1
Pip5k1c	0.446997	-0.681974	0.233	0.278	1
Paxx	0.447873	0.900575	0.1	0.278	1
AABR07017145.2	0.451902	1.06087	0.2	0.167	1
Actb	0.454387	-0.671887	0.567	0.5	1
Scd2	0.457353	-0.564893	0.067	0.111	1
Mrpl4	0.45963	-0.557346	0.067	0.111	1
2020-09-08	0.464596	0.721318	0.133	0.111	1
Ndn	0.46505	1.04942	0.2	0.167	1
Ppt1	0.468008	-0.581443	0.1	0.111	1
Mrpl17	0.469715	-1.09508	0.167	0.167	1
Csnk1g2	0.473976	-0.576784	0.067	0.111	1
Cracd	0.475627	-1.29719	0.167	0.222	1
Pdcd2	0.476369	-0.538997	0.1	0.111	1
Aes	0.477153	0.562785	0.167	0.167	1
Prkcz	0.487449	-1.15484	0.067	0.111	1
Btaf1	0.487856	-0.747214	0.267	0.278	1
Morf4l2	0.497104	1.17445	0.2	0.222	1
Bola1	0.499861	0.615186	0.133	0.111	1
Nme1	0.501192	0.587787	0.2	0.167	1
Trim44	0.503463	-1.12986	0.167	0.167	1
Pcdha11-Pcdha9-Pcdha8-Pcdha3-Pcdha10-Pcdha4-Pcdha7-Pcdha1-Pcdhac2-Pcdhac1-Pcdha2-Pcdha6-Pcdha13-Pcdha12-Pcdha5	0.506212	-0.67788	0.1	0.111	1
Arl8b	0.507475	-0.510826	0.067	0.111	1
Arl16	0.517249	-0.81093	0.1	0.111	1
Atp6v1d	0.517251	1.02183	0.233	0.111	1
Psmd14	0.518489	0.528067	0.133	0.056	1
Cst3	0.518698	0.887891	0.367	0.333	1
Cnbp	0.51918	0.641854	0.1	0.111	1
Pnoc	0.523566	0.641854	0.133	0.111	1
Syt13	0.526892	-0.560836	0.067	0.111	1
Smim26	0.527437	-0.667172	0.167	0.222	1
Crmp1	0.528118	-0.533815	0.1	0.111	1
Rpl17	0.528804	0.562785	0.167	0.167	1
Uhrf1bp1l	0.53311	-0.641446	0.067	0.111	1
Ranbp1	0.539537	0.652325	0.067	0.111	1
LOC102555659	0.540988	-1.2851	0.133	0.222	1
Ctsd	0.544691	-0.555946	0.2	0.222	1
Hypk	0.54832	-0.880359	0.2	0.222	1
Syn1	0.548716	0.747635	0.133	0.056	1
Ttc3	0.548746	0.520776	0.6	0.611	1
Rab3gap2	0.549523	1.15924	0.133	0.111	1
Cx3cl1	0.553061	-0.798508	0.133	0.111	1
Ddah1	0.553159	1.05388	0.2	0.111	1
Hnrnpu	0.554977	-0.510826	0.133	0.111	1
Hspd1	0.555375	0.784497	0.167	0.111	1
Tubb2a	0.556564	0.772285	0.3	0.167	1
Mrpl54	0.568167	1.05098	0.3	0.278	1
Tmem234	0.568447	1.0033	0.1	0.111	1
Grina	0.578026	-0.854597	0.1	0.111	1
Zrsr2	0.579759	0.555526	0.1	0.167	1
Abcf1	0.582865	0.834311	0.133	0.111	1
Klhdc8b	0.594572	-0.623304	0.067	0.111	1
Bpnt1	0.599482	0.82746	0.133	0.111	1
Polr1d	0.601456	1.83621	0.067	0.111	1
Ubc	0.601868	0.725937	0.167	0.222	1
Mast2	0.603595	0.671168	0.133	0.167	1
Pet100	0.608832	1.5294	0.1	0.111	1
Cpeb3	0.609273	-0.635989	0.133	0.111	1
Atp5f1c-094163	0.610091	0.943419	0.433	0.278	1
Chd3	0.620797	1.2164	0.167	0.222	1
Ufm1	0.625011	-0.510826	0.1	0.111	1
Cep19	0.634409	0.741937	0.067	0.111	1
Pea15	0.638756	0.747635	0.133	0.167	1
Pam16	0.641023	0.518794	0.2	0.167	1
Rpl21	0.64196	0.570087	0.367	0.389	1
Zfp91	0.644138	-0.667395	0.1	0.111	1
Slc6a1	0.644407	1.09861	0.2	0.222	1
Ankrd12	0.644831	-1.02549	0.133	0.111	1
Tspyl4	0.647011	0.587787	0.3	0.278	1
Traf3	0.64868	-0.623093	0.067	0.111	1
Ncl	0.656112	-0.550566	0.133	0.167	1
Rpl7	0.662999	-0.875939	0.2	0.167	1
Slc25a17-St13	0.663784	-0.965888	0.2	0.111	1
Epm2aip1	0.671553	1.61905	0.1	0.167	1
Zfand3	0.671815	0.752866	0.1	0.111	1
Pfkp	0.675346	-0.601797	0.133	0.111	1
Mapk10	0.679633	-0.529175	0.133	0.167	1
Prkce	0.681903	1.1474	0.1	0.167	1
Fbxo10.2	0.700007	1.14611	0.233	0.278	1
Alcam	0.700908	0.607787	0.033	0.111	1
Cab39	0.706844	1.47876	0.1	0.167	1
Tpr	0.710656	-0.530244	0.067	0.111	1
Cox4i1	0.717705	0.550573	0.633	0.833	1
Cbx5	0.72901	0.955511	0.167	0.222	1
Sec61b	0.732391	0.764717	0.133	0.167	1
Phf14	0.738496	0.509534	0.067	0.167	1
Ndufb11	0.740934	0.670478	0.333	0.278	1
Ina	0.745636	0.688257	0.2	0.167	1
Tufm	0.750283	-0.702717	0.133	0.111	1
Uba1	0.758116	0.979829	0.067	0.111	1
Bcat1	0.760178	1.048	0.467	0.389	1
Ctnnbip1	0.761045	0.635643	0.1	0.111	1
Hadha	0.761948	-0.923358	0.167	0.167	1
Nsa2	0.762313	-0.523729	0.2	0.222	1
Cartpt	0.765978	0.838011	0.167	0.167	1
AABR07052500.1	0.770994	-0.679902	0.133	0.056	1
Uqcr11	0.777671	0.780159	0.633	0.722	1
Eps15	0.783264	0.883501	0.067	0.111	1
Olfm1	0.789145	0.606479	0.267	0.222	1
Ppp1ca	0.792338	0.649918	0.1	0.167	1
Ssu72	0.793208	0.804851	0.1	0.111	1
Snrpd2	0.793457	-0.7694	0.1	0.167	1
Eml4	0.808406	0.527162	0.033	0.111	1
Rgmb	0.812524	1.26354	0.067	0.111	1
Rb1cc1	0.831771	-0.646627	0.1	0.111	1
Dlat	0.834189	0.663294	0.1	0.111	1
Fem1b	0.834992	-0.510826	0.1	0.111	1
Lin7c	0.843565	0.997076	0.067	0.111	1
Ids	0.850579	0.772521	0.1	0.222	1
Rnf214	0.862432	0.545227	0.133	0.222	1
Pmvk	0.867631	0.983682	0.167	0.222	1
Mapk8ip1	0.870939	0.64462	0.2	0.222	1
Bad	0.871496	0.629898	0.1	0.111	1
Ube3a	0.871921	0.665173	0.133	0.111	1
Slk	0.87251	1.05082	0.1	0.222	1
Lsm3	0.87335	1.06087	0.033	0.111	1
Rpl34	0.87389	-0.748497	0.4	0.389	1
Zfp106	0.880998	1.22378	0.067	0.111	1
Ddx24	0.884296	0.521095	0.067	0.111	1
Iscu	0.884309	0.528598	0.133	0.111	1
Scg5	0.888339	-0.897599	0.133	0.056	1
Prdx5	0.899688	-0.663017	0.233	0.167	1
Dzip1	0.905946	1.32539	0.133	0.222	1
GL.11587	0.906861	0.783095	0.233	0.222	1
Calm1	0.917907	0.505658	0.9	1	1
Pafah1b1	0.93293	-0.654865	0.2	0.167	1
Pmm1	0.937553	1.39128	0.067	0.111	1
Sat1	0.937643	0.665496	0.067	0.111	1
Rfesd	0.939029	0.854415	0.033	0.111	1
Abhd8	0.945716	0.640155	0.133	0.222	1
Aktip	0.949154	0.722706	0.067	0.111	1
Map4	0.95234	0.671168	0.3	0.278	1
Nedd8	0.953688	0.636946	0.333	0.333	1
Hp1bp3	0.957622	0.80401	0.1	0.167	1
Fastk	0.964662	0.632238	0.033	0.111	1
Phactr1	0.969877	0.921793	0.2	0.333	1
Cmpk1	0.977252	1.08712	0.1	0.167	1
Higd1a	0.97895	0.513679	0.1	0.111	1
Usp14	0.98638	-0.747214	0.2	0.167	1
Cd47	0.99398	0.532524	0.1	0.167	1
Stxbp1	0.995103	0.500775	0.267	0.333	1
Lrrc73	0.995233	0.635133	0.1	0.111	1
Rab2a	0.997468	-0.542078	0.167	0.111	1
