# Supplementary material for: Subcellular sequencing of single neurons reveals the dendritic transcriptome of GABAergic interneurons
Source: eLife. 2021 Jan 6;10:e63092. doi: 10.7554/eLife.63092 (PMC7819707; doi:10.7554/eLife.63092)
Supplement: Supplementary file 6. — Related to Figure 5. Contains results of GSEA ranked test for somata (Tab 1) and dendrites (Tab 2). [file elife-63092-supp6.xlsx]

## Sheet: Sheet1
GO_ID	GO_Name	Genes_Considered_in_GSEA	Somata_FDR	Dendrites_FDR	Somata_NES	Dendrites_NES	Somata_LeadingEdge	Dendrites_LeadingEdge	Category	Significant_Comparment
GO:0098803	RESPIRATORY CHAIN COMPLEX	59	0	0	3.9804	2.24045	tags=90%, list=18%, signal=108%	tags=86%, list=9%, signal=94%	Mitochondria	Both
GO:0005746	MITOCHONDRIAL RESPIRATORY CHAIN	62	0	0	3.95137	2.23225	tags=87%, list=18%, signal=105%	tags=84%, list=9%, signal=91%	Mitochondria	Both
GO:0070469	RESPIRATORY CHAIN	66	0	0	3.92477	2.22549	tags=86%, list=18%, signal=104%	tags=86%, list=12%, signal=97%	Mitochondria	Both
GO:0005747	MITOCHONDRIAL RESPIRATORY CHAIN COMPLEX I	37	0	0	3.78022	2.20504	tags=95%, list=18%, signal=114%	tags=89%, list=9%, signal=97%	Mitochondria	Both
GO:0045271	RESPIRATORY CHAIN COMPLEX I	37	0	0	3.84437	2.20216	tags=95%, list=18%, signal=114%	tags=89%, list=9%, signal=97%	Mitochondria	Both
GO:0098800	INNER MITOCHONDRIAL MEMBRANE PROTEIN COMPLEX	100	0	0	3.59931	2.20113	tags=73%, list=18%, signal=87%	tags=70%, list=9%, signal=76%	Mitochondria	Both
GO:0030964	NADH DEHYDROGENASE COMPLEX	37	0	0	3.72307	2.19249	tags=95%, list=18%, signal=114%	tags=89%, list=9%, signal=97%	Mitochondria	Both
GO:0045259	PROTON-TRANSPORTING ATP SYNTHASE COMPLEX	17	0	0	3.122	2.17396	tags=76%, list=3%, signal=79%	tags=82%, list=4%, signal=86%	Mitochondria	Both
GO:0022626	CYTOSOLIC RIBOSOME	69	0	0	2.7935	2.16035	tags=71%, list=29%, signal=99%	tags=75%, list=10%, signal=83%	Translation	Both
GO:0033177	PROTON-TRANSPORTING TWO-SECTOR ATPASE COMPLEX, PROTON-TRANSPORTING DOMAIN	15	0	0	3.1159	2.15217	tags=87%, list=9%, signal=95%	tags=80%, list=4%, signal=83%	Mitochondria	Both
SYNGO:POSTSYN_RIBOSOME	POSTSYNAPTIC RIBOSOME	50	0	0	2.75692	2.15045	tags=74%, list=28%, signal=102%	tags=84%, list=10%, signal=93%	Translation	Both
GO:0005753	MITOCHONDRIAL PROTON-TRANSPORTING ATP SYNTHASE COMPLEX	16	0	0	3.12177	2.14283	tags=81%, list=3%, signal=84%	tags=88%, list=4%, signal=91%	Mitochondria	Both
SYNGO:TRANSLATION_POSTSYNAPSE	PROTEIN TRANSLATION AT POSTSYNAPSE	40	0	0	2.75006	2.12411	tags=78%, list=28%, signal=107%	tags=80%, list=10%, signal=89%	Translation	Both
GO:0022625	CYTOSOLIC LARGE RIBOSOMAL SUBUNIT	39	0	0	2.74062	2.11559	tags=87%, list=34%, signal=131%	tags=82%, list=10%, signal=91%	Translation	Both
GO:0070069	CYTOCHROME COMPLEX	19	0	0	3.0694	2.10771	tags=84%, list=11%, signal=95%	tags=89%, list=8%, signal=97%	Mitochondria	Both
SYNGO:TRANSLATION_PRESYNAPSE	PROTEIN TRANSLATION AT PRESYNAPSE	37	0	0	2.73803	2.10604	tags=78%, list=28%, signal=108%	tags=84%, list=10%, signal=93%	Translation	Both
SYNGO:PRESYN_RIBOSOME	PRESYNAPTIC RIBOSOME	37	0	0	2.70852	2.10298	tags=78%, list=28%, signal=108%	tags=84%, list=10%, signal=93%	Translation	Both
GO:0016469	PROTON-TRANSPORTING TWO-SECTOR ATPASE COMPLEX	34	0	0	3.62267	2.10006	tags=79%, list=9%, signal=87%	tags=71%, list=9%, signal=77%	Mitochondria	Both
GO:0022627	CYTOSOLIC SMALL RIBOSOMAL SUBUNIT	29	0.000135926	0	2.33364	2.09623	tags=59%, list=18%, signal=71%	tags=72%, list=9%, signal=80%	Translation	Both
SYNGO:TRANSLATION_SYNAPSE	PROTEIN TRANSLATION AT SYNAPSE	40	0	0	2.72887	2.09253	tags=78%, list=28%, signal=107%	tags=80%, list=10%, signal=89%	Translation	Both
GO:0098556	CYTOPLASMIC SIDE OF ROUGH ENDOPLASMIC RETICULUM MEMBRANE	21	0.000490605	0	2.22321	2.07439	tags=62%, list=18%, signal=75%	tags=81%, list=10%, signal=90%	Others	Both
GO:1990204	OXIDOREDUCTASE COMPLEX	71	0	0	3.55107	2.06231	tags=75%, list=19%, signal=91%	tags=68%, list=12%, signal=76%	Mitochondria	Both
GO:0098554	CYTOPLASMIC SIDE OF ENDOPLASMIC RETICULUM MEMBRANE	25	8.71893e-05	0	2.36909	2.003	tags=76%, list=30%, signal=109%	tags=68%, list=10%, signal=75%	Others	Both
SYNGO:METABOLISM	METABOLISM	66	8.96804e-05	4.13175e-05	2.37106	1.95719	tags=61%, list=28%, signal=83%	tags=56%, list=11%, signal=62%	Unchanged	Unchanged
GO:0042788	POLYSOMAL RIBOSOME	25	0.00156927	7.92191e-05	2.0929	1.92412	tags=56%, list=18%, signal=68%	tags=76%, list=15%, signal=89%	Translation	Both
GO:0030867	ROUGH ENDOPLASMIC RETICULUM MEMBRANE	37	0.00728467	0.000114418	1.91663	1.85154	tags=57%, list=27%, signal=78%	tags=54%, list=14%, signal=63%	Others	Both
GO:0005844	POLYSOME	53	0.00468669	0.000368092	1.97257	1.81722	tags=49%, list=22%, signal=62%	tags=57%, list=16%, signal=67%	Translation	Both
GO:0005791	ROUGH ENDOPLASMIC RETICULUM	69	0.00130093	0.000533021	2.11913	1.79474	tags=55%, list=27%, signal=75%	tags=49%, list=17%, signal=58%	Others	Both
GO:0015934	LARGE RIBOSOMAL SUBUNIT	88	0.000286624	0.000548931	2.27357	1.78978	tags=83%, list=49%, signal=159%	tags=51%, list=14%, signal=59%	Translation	Both
GO:0033176	PROTON-TRANSPORTING V-TYPE ATPASE COMPLEX	16	0	0.000563595	2.86904	1.77739	tags=81%, list=13%, signal=93%	tags=75%, list=18%, signal=91%	Mitochondria	Both
GO:0099186	STRUCTURAL CONSTITUENT OF POSTSYNAPSE	19	0.0294381	0.00230987	1.72643	1.7295	tags=63%, list=31%, signal=91%	tags=74%, list=21%, signal=93%	Synapse & Neurites	Both
GO:0043209	MYELIN SHEATH	24	0.0134873	0.0024244	1.83992	1.72803	tags=38%, list=8%, signal=41%	tags=50%, list=16%, signal=59%	Others	Both
GO:0015935	SMALL RIBOSOMAL SUBUNIT	55	0.0380033	0.00346715	1.68726	1.70773	tags=53%, list=30%, signal=75%	tags=60%, list=22%, signal=76%	Translation	Both
GO:0005882	INTERMEDIATE FILAMENT	17	0.00106202	0.00336518	2.15003	1.70757	tags=53%, list=10%, signal=59%	tags=53%, list=13%, signal=61%	Cytoskeleton	Both
GO:0098562	CYTOPLASMIC SIDE OF MEMBRANE	94	0.0533247	0.00346815	1.62737	1.70462	tags=34%, list=18%, signal=41%	tags=41%, list=13%, signal=47%	Unchanged	Unchanged
GO:0044295	AXONAL GROWTH CONE	29	0.0209384	0.00406339	1.77655	1.69617	tags=62%, list=34%, signal=94%	tags=45%, list=11%, signal=50%	Synapse & Neurites	Both
GO:0032839	DENDRITE CYTOPLASM	24	0.00494279	0.00492178	1.96432	1.68667	tags=63%, list=27%, signal=86%	tags=42%, list=10%, signal=46%	Synapse & Neurites	Both
GO:0043195	TERMINAL BOUTON	62	0	0.00895854	2.72393	1.65232	tags=63%, list=24%, signal=81%	tags=61%, list=23%, signal=79%	Synapse & Neurites	Both
GO:0098918	STRUCTURAL CONSTITUENT OF SYNAPSE	28	0.0152643	0.0104899	1.8218	1.64171	tags=61%, list=31%, signal=88%	tags=68%, list=23%, signal=88%	Synapse & Neurites	Both
GO:0099571	POSTSYNAPTIC CYTOSKELETON	16	0.002644	0.0105765	2.04065	1.64039	tags=69%, list=25%, signal=91%	tags=56%, list=13%, signal=64%	Synapse & Neurites	Both
GO:0005871	KINESIN COMPLEX	18	0.0015968	0.0103428	2.09478	1.63989	tags=83%, list=37%, signal=133%	tags=50%, list=14%, signal=58%	Cytoskeleton	Both
GO:1904115	AXON CYTOPLASM	39	0.000818585	0.0250544	2.18152	1.58584	tags=74%, list=37%, signal=118%	tags=36%, list=8%, signal=39%	Synapse & Neurites	Both
GO:0008021	SYNAPTIC VESICLE	70	0	0.0335223	2.61658	1.56592	tags=54%, list=18%, signal=65%	tags=56%, list=23%, signal=71%	Synapse & Neurites	Both
GO:0005834	HETEROTRIMERIC G-PROTEIN COMPLEX	16	0.475329	0.0337111	1.08467	1.56393	tags=38%, list=22%, signal=48%	tags=69%, list=24%, signal=90%	Others	Dendrites
GO:0099059	INTEGRAL COMPONENT OF PRESYNAPTIC ACTIVE ZONE MEMBRANE	22	0	0.0338029	2.66828	1.56235	tags=68%, list=12%, signal=77%	tags=59%, list=20%, signal=74%	Synapse & Neurites	Both
GO:1905360	GTPASE COMPLEX	16	0.46652	0.033544	1.09334	1.56122	tags=38%, list=22%, signal=48%	tags=69%, list=24%, signal=90%	Others	Dendrites
GO:0016079	SYNAPTIC VESICLE EXOCYTOSIS	40	0.015186	0.0380215	1.82099	1.54983	tags=52%, list=30%, signal=74%	tags=33%, list=11%, signal=36%	Synapse & Neurites	Both
GO:0032838	PLASMA MEMBRANE BOUNDED CELL PROJECTION CYTOPLASM	84	0.00207962	0.0377686	2.06481	1.54874	tags=58%, list=34%, signal=87%	tags=45%, list=22%, signal=57%	Synapse & Neurites	Both
GO:0005875	MICROTUBULE ASSOCIATED COMPLEX	53	0.00015457	0.0377694	2.32311	1.54717	tags=62%, list=29%, signal=86%	tags=49%, list=23%, signal=63%	Cytoskeleton	Both
GO:0090723	GROWTH CONE PART	17	0.0316694	0.0385877	1.71574	1.54416	tags=71%, list=38%, signal=113%	tags=47%, list=13%, signal=54%	Synapse & Neurites	Both
GO:0120111	NEURON PROJECTION CYTOPLASM	62	0.000501629	0.0404655	2.2182	1.53964	tags=61%, list=29%, signal=86%	tags=48%, list=22%, signal=61%	Synapse & Neurites	Both
GO:0044305	CALYX OF HELD	15	0.023674	0.0411412	1.7578	1.53672	tags=67%, list=28%, signal=93%	tags=47%, list=12%, signal=53%	Unchanged	Unchanged
GO:0034704	CALCIUM CHANNEL COMPLEX	25	0.298985	0.042206	1.25251	1.53381	tags=60%, list=43%, signal=105%	tags=36%, list=17%, signal=43%	Others	Dendrites
GO:0097014	CILIARY PLASM	22	0.249868	0.0414244	1.30286	1.53379	tags=27%, list=11%, signal=30%	tags=36%, list=15%, signal=43%	Synapse & Neurites	Both
GO:0005930	AXONEME	22	0.264813	0.0416672	1.2891	1.53215	tags=27%, list=11%, signal=30%	tags=36%, list=15%, signal=43%	Synapse & Neurites	Dendrites
GO:0048787	PRESYNAPTIC ACTIVE ZONE MEMBRANE	29	0	0.0436598	2.65813	1.52753	tags=72%, list=24%, signal=94%	tags=59%, list=22%, signal=75%	Synapse & Neurites	Both
GO:0031970	ORGANELLE ENVELOPE LUMEN	59	0.102267	0.0459144	1.5065	1.52243	tags=66%, list=49%, signal=128%	tags=27%, list=9%, signal=30%	Mitochondria	Both
GO:0005758	MITOCHONDRIAL INTERMEMBRANE SPACE	55	0.12056	0.0452087	1.46437	1.52218	tags=65%, list=49%, signal=127%	tags=25%, list=9%, signal=28%	Mitochondria	Both
GO:0043292	CONTRACTILE FIBER	83	0.000731372	0.0452353	2.19324	1.52106	tags=45%, list=19%, signal=55%	tags=39%, list=18%, signal=46%	Cytoskeleton	Both
GO:0031594	NEUROMUSCULAR JUNCTION	48	0.00186387	0.0493911	2.07293	1.513	tags=40%, list=12%, signal=45%	tags=48%, list=21%, signal=60%	Unchanged	Unchanged
GO:0048488	SYNAPTIC VESICLE ENDOCYTOSIS	32	0.00460411	0.0509483	1.97581	1.50918	tags=66%, list=34%, signal=99%	tags=56%, list=20%, signal=70%	Synapse & Neurites	Both
GO:0099501	EXOCYTIC VESICLE MEMBRANE	74	0.000158533	0.0511542	2.32538	1.50762	tags=65%, list=34%, signal=97%	tags=54%, list=26%, signal=72%	Synapse & Neurites	Both
GO:0008076	VOLTAGE-GATED POTASSIUM CHANNEL COMPLEX	34	0.0835744	0.0521275	1.55012	1.5048	tags=59%, list=37%, signal=93%	tags=26%, list=9%, signal=29%	Synapse & Neurites	Both
GO:0030017	SARCOMERE	68	0.000175914	0.0547508	2.30421	1.49958	tags=47%, list=19%, signal=58%	tags=40%, list=18%, signal=48%	Unchanged	Unchanged
GO:0050807	REGULATION OF SYNAPSE ORGANIZATION	18	0.121752	0.0562518	1.46095	1.49608	tags=67%, list=40%, signal=110%	tags=39%, list=15%, signal=46%	Synapse & Neurites	Both
GO:0097733	PHOTORECEPTOR CELL CILIUM	20	0.102609	0.0604224	1.50692	1.48948	tags=30%, list=6%, signal=32%	tags=20%, list=4%, signal=21%	Unchanged	Unchanged
GO:0008180	COP9 SIGNALOSOME	19	0.0018613	0.0627001	2.07491	1.48475	tags=79%, list=33%, signal=117%	tags=32%, list=10%, signal=35%	Others	Both
GO:0097731	9+0 NON-MOTILE CILIUM	21	0.114766	0.0645447	1.47926	1.48118	tags=29%, list=6%, signal=30%	tags=19%, list=4%, signal=20%	Cytoskeleton	Both
GO:0048786	PRESYNAPTIC ACTIVE ZONE	48	0	0.0662348	2.61088	1.47779	tags=65%, list=24%, signal=84%	tags=52%, list=23%, signal=67%	Synapse & Neurites	Both
GO:0044449	CONTRACTILE FIBER PART	72	0.00111771	0.067947	2.13201	1.47465	tags=44%, list=19%, signal=55%	tags=38%, list=18%, signal=45%	Cytoskeleton	Both
GO:0034705	POTASSIUM CHANNEL COMPLEX	39	0.0548652	0.067859	1.62301	1.47352	tags=59%, list=37%, signal=94%	tags=26%, list=9%, signal=28%	Synapse & Neurites	Both
GO:0042470	MELANOSOME	52	0	0.0678977	2.45563	1.47271	tags=69%, list=31%, signal=99%	tags=46%, list=23%, signal=59%	Unchanged	Unchanged
GO:0005839	PROTEASOME CORE COMPLEX	15	0	0.069394	2.63792	1.46954	tags=93%, list=22%, signal=120%	tags=87%, list=30%, signal=124%	Proteasome	Both
GO:0030016	MYOFIBRIL	80	0.00161254	0.0700983	2.08621	1.46751	tags=43%, list=19%, signal=52%	tags=36%, list=18%, signal=43%	Unchanged	Unchanged
GO:0048770	PIGMENT GRANULE	52	0	0.070809	2.51568	1.46535	tags=69%, list=31%, signal=99%	tags=46%, list=23%, signal=59%	Unchanged	Unchanged
GO:0031305	INTEGRAL COMPONENT OF MITOCHONDRIAL INNER MEMBRANE	29	0.0414527	0.0742389	1.67068	1.45992	tags=66%, list=39%, signal=106%	tags=38%, list=16%, signal=45%	Mitochondria	Both
GO:0097440	APICAL DENDRITE	17	0.0262249	0.0763264	1.74294	1.45671	tags=59%, list=29%, signal=83%	tags=35%, list=17%, signal=43%	Cytoskeleton	Both
GO:0044304	MAIN AXON	53	0.00111931	0.0756924	2.13838	1.45626	tags=57%, list=28%, signal=78%	tags=26%, list=9%, signal=29%	Synapse & Neurites	Both
GO:0045111	INTERMEDIATE FILAMENT CYTOSKELETON	32	0.011698	0.077735	1.85739	1.45274	tags=38%, list=10%, signal=41%	tags=34%, list=13%, signal=39%	Cytoskeleton	Both
GO:0031304	INTRINSIC COMPONENT OF MITOCHONDRIAL INNER MEMBRANE	29	0.0505524	0.0769991	1.63845	1.45256	tags=66%, list=39%, signal=106%	tags=38%, list=16%, signal=45%	Mitochondria	Both
GO:0030672	SYNAPTIC VESICLE MEMBRANE	50	0.000171725	0.0770313	2.29773	1.45131	tags=68%, list=34%, signal=102%	tags=54%, list=25%, signal=71%	Synapse & Neurites	Both
GO:0005771	MULTIVESICULAR BODY	16	0.0153323	0.0785086	1.82349	1.44879	tags=69%, list=28%, signal=96%	tags=56%, list=22%, signal=72%	Others	Both
GO:0043194	AXON INITIAL SEGMENT	16	0.00047896	0.0789899	2.22539	1.44724	tags=75%, list=23%, signal=97%	tags=25%, list=9%, signal=27%	Synapse & Neurites	Both
GO:0005876	SPINDLE MICROTUBULE	27	0.0116781	0.0784171	1.85928	1.44678	tags=70%, list=39%, signal=115%	tags=48%, list=24%, signal=63%	Unchanged	Unchanged
GO:0032587	RUFFLE MEMBRANE	34	0.276905	0.0793571	1.27682	1.44474	tags=44%, list=30%, signal=63%	tags=35%, list=14%, signal=41%	Synapse & Neurites	Dendrites
GO:0031256	LEADING EDGE MEMBRANE	74	0.0150221	0.0798007	1.82694	1.44331	tags=50%, list=30%, signal=71%	tags=32%, list=15%, signal=38%	Synapse & Neurites	Both
GO:0034703	CATION CHANNEL COMPLEX	91	0.11461	0.0823727	1.47845	1.43932	tags=51%, list=37%, signal=80%	tags=33%, list=19%, signal=40%	Synapse & Neurites	Both
SYNGO:TRANSPORT	TRANSPORT	26	0.000902723	0.0857025	2.16939	1.43455	tags=65%, list=27%, signal=90%	tags=65%, list=32%, signal=96%	Cytoskeleton	Both
GO:0001726	RUFFLE	68	0.31966	0.0862048	1.22859	1.43285	tags=41%, list=31%, signal=59%	tags=37%, list=21%, signal=46%	Synapse & Neurites	Dendrites
GO:0030018	Z DISC	42	0.0073736	0.0905563	1.92076	1.42732	tags=45%, list=19%, signal=55%	tags=57%, list=29%, signal=80%	Unchanged	Unchanged
GO:0030175	FILOPODIUM	51	0.121331	0.0957625	1.46246	1.42148	tags=55%, list=40%, signal=90%	tags=31%, list=15%, signal=36%	Cytoskeleton	Both
GO:0046658	ANCHORED COMPONENT OF PLASMA MEMBRANE	17	0.358195	0.1017	1.19166	1.41536	tags=29%, list=11%, signal=33%	tags=76%, list=32%, signal=112%	Others	Dendrites
GO:0030027	LAMELLIPODIUM	89	0.0912024	0.101902	1.53176	1.41445	tags=53%, list=38%, signal=84%	tags=48%, list=28%, signal=66%	Cytoskeleton	Both
GO:0031674	I BAND	43	0.00601003	0.111642	1.94298	1.40495	tags=44%, list=19%, signal=54%	tags=56%, list=29%, signal=78%	Unchanged	Unchanged
GO:0097729	9+2 MOTILE CILIUM	22	0.0211897	0.117781	1.77841	1.39888	tags=55%, list=27%, signal=74%	tags=50%, list=23%, signal=65%	Cytoskeleton	Both
GO:0032432	ACTIN FILAMENT BUNDLE	27	0.0342879	0.120714	1.70369	1.39554	tags=56%, list=30%, signal=79%	tags=41%, list=16%, signal=48%	Cytoskeleton	Both
GO:0009898	CYTOPLASMIC SIDE OF PLASMA MEMBRANE	65	0.614074	0.12182	0.981118	1.39387	tags=25%, list=18%, signal=30%	tags=52%, list=29%, signal=73%	Others	Dendrites
GO:0036126	SPERM FLAGELLUM	22	0.0209637	0.142852	1.77735	1.37732	tags=55%, list=27%, signal=74%	tags=50%, list=23%, signal=65%	Unchanged	Unchanged
GO:0031201	SNARE COMPLEX	28	0.216516	0.144447	1.34331	1.37519	tags=29%, list=12%, signal=32%	tags=18%, list=4%, signal=19%	Synapse & Neurites	Both
GO:0099531	PRESYNAPTIC PROCESS INVOLVED IN CHEMICAL SYNAPTIC TRANSMISSION	15	0.289865	0.144467	1.26404	1.37413	tags=40%, list=19%, signal=49%	tags=47%, list=22%, signal=59%	Synapse & Neurites	Dendrites
GO:0030285	INTEGRAL COMPONENT OF SYNAPTIC VESICLE MEMBRANE	22	0.000703253	0.144288	2.19653	1.37327	tags=68%, list=27%, signal=93%	tags=45%, list=20%, signal=57%	Synapse & Neurites	Both
GO:0099738	CELL CORTEX REGION	24	0.00173886	0.150144	2.08127	1.36827	tags=58%, list=22%, signal=74%	tags=63%, list=31%, signal=90%	Cytoskeleton	Both
GO:0005902	MICROVILLUS	19	0.0293585	0.152194	1.72808	1.36587	tags=68%, list=37%, signal=108%	tags=42%, list=19%, signal=52%	Cytoskeleton	Both
GO:0016234	INCLUSION BODY	40	0.0199224	0.15234	1.78681	1.36479	tags=60%, list=33%, signal=89%	tags=68%, list=36%, signal=106%	Others	Both
GO:0005790	SMOOTH ENDOPLASMIC RETICULUM	29	0.00730191	0.152017	1.92062	1.36399	tags=59%, list=27%, signal=80%	tags=38%, list=18%, signal=46%	Others	Both
GO:0099171	PRESYNAPTIC MODULATION OF CHEMICAL SYNAPTIC TRANSMISSION	15	0.312633	0.15539	1.23748	1.36075	tags=40%, list=19%, signal=49%	tags=47%, list=22%, signal=59%	Synapse & Neurites	Dendrites
GO:0005881	CYTOPLASMIC MICROTUBULE	30	0.0497845	0.159009	1.64132	1.35757	tags=67%, list=44%, signal=118%	tags=20%, list=9%, signal=22%	Cytoskeleton	Both
GO:0031225	ANCHORED COMPONENT OF MEMBRANE	47	0.0848131	0.160275	1.54336	1.35578	tags=51%, list=34%, signal=76%	tags=60%, list=32%, signal=88%	Synapse & Neurites	Both
GO:0098573	INTRINSIC COMPONENT OF MITOCHONDRIAL MEMBRANE	52	0.0510014	0.166266	1.63525	1.35095	tags=60%, list=39%, signal=98%	tags=35%, list=18%, signal=42%	Mitochondria	Both
GO:0032592	INTEGRAL COMPONENT OF MITOCHONDRIAL MEMBRANE	52	0.0557658	0.16622	1.61924	1.34998	tags=60%, list=39%, signal=98%	tags=35%, list=18%, signal=42%	Mitochondria	Both
GO:0031514	MOTILE CILIUM	38	0.0229657	0.167394	1.76208	1.34819	tags=45%, list=23%, signal=57%	tags=45%, list=23%, signal=58%	Cytoskeleton	Both
GO:0005720	NUCLEAR HETEROCHROMATIN	19	0.101553	0.17307	1.50962	1.34348	tags=47%, list=23%, signal=61%	tags=42%, list=17%, signal=51%	Nucleus & Splicing	Both
GO:0031234	EXTRINSIC COMPONENT OF CYTOPLASMIC SIDE OF PLASMA MEMBRANE	45	0.838481	0.171935	0.788041	1.34326	tags=91%, list=80%, signal=445%	tags=44%, list=25%, signal=59%	Others	Dendrites
GO:0005776	AUTOPHAGOSOME	43	0.417989	0.178557	1.14175	1.33817	tags=47%, list=36%, signal=73%	tags=21%, list=8%, signal=23%	Others	Dendrites
GO:0097730	NON-MOTILE CILIUM	31	0.219376	0.178676	1.34001	1.33715	tags=45%, list=31%, signal=66%	tags=29%, list=19%, signal=36%	Cytoskeleton	Both
GO:0016529	SARCOPLASMIC RETICULUM	27	0.103462	0.178389	1.50251	1.33636	tags=48%, list=27%, signal=66%	tags=63%, list=35%, signal=96%	Unchanged	Unchanged
GO:0030286	DYNEIN COMPLEX	21	0.04095	0.177052	1.67519	1.33627	tags=43%, list=14%, signal=50%	tags=67%, list=35%, signal=103%	Cytoskeleton	Both
GO:0016459	MYOSIN COMPLEX	15	0.120905	0.178621	1.46482	1.33451	tags=40%, list=16%, signal=48%	tags=27%, list=11%, signal=30%	Cytoskeleton	Both
GO:0005868	CYTOPLASMIC DYNEIN COMPLEX	17	0.0360729	0.177856	1.69472	1.33408	tags=47%, list=14%, signal=55%	tags=71%, list=35%, signal=108%	Cytoskeleton	Both
GO:0032281	AMPA GLUTAMATE RECEPTOR COMPLEX	16	0.418264	0.181203	1.14267	1.33111	tags=25%, list=8%, signal=27%	tags=44%, list=21%, signal=55%	Synapse & Neurites	Dendrites
GO:0005903	BRUSH BORDER	30	0.193354	0.181994	1.37431	1.32977	tags=77%, list=56%, signal=171%	tags=47%, list=26%, signal=63%	Unchanged	Unchanged
GO:0005905	CLATHRIN-COATED PIT	27	0.0210436	0.182477	1.77802	1.32858	tags=56%, list=28%, signal=77%	tags=67%, list=34%, signal=101%	Others	Both
GO:0032589	NEURON PROJECTION MEMBRANE	36	0.0229031	0.181665	1.76442	1.32823	tags=53%, list=30%, signal=74%	tags=25%, list=7%, signal=27%	Synapse & Neurites	Both
GO:0045335	PHAGOCYTIC VESICLE	39	0.262398	0.180761	1.2918	1.32795	tags=38%, list=24%, signal=50%	tags=49%, list=28%, signal=68%	Others	Dendrites
GO:0000777	CONDENSED CHROMOSOME KINETOCHORE	17	0.0117905	0.190855	1.85576	1.3214	tags=53%, list=16%, signal=63%	tags=71%, list=35%, signal=108%	Nucleus & Splicing	Both
GO:1990752	MICROTUBULE END	18	0.00857496	0.201717	1.8948	1.31438	tags=78%, list=37%, signal=123%	tags=56%, list=26%, signal=75%	Cytoskeleton	Both
GO:0098858	ACTIN-BASED CELL PROJECTION	82	0.203191	0.207803	1.35776	1.31029	tags=51%, list=41%, signal=85%	tags=28%, list=16%, signal=33%	Cytoskeleton	Both
GO:0014704	INTERCALATED DISC	29	0.0347074	0.209384	1.7009	1.30843	tags=62%, list=35%, signal=95%	tags=34%, list=14%, signal=40%	Unchanged	Unchanged
GO:0016328	LATERAL PLASMA MEMBRANE	19	0.170019	0.209373	1.40043	1.30746	tags=32%, list=9%, signal=34%	tags=47%, list=23%, signal=62%	Others	Both
GO:0030666	ENDOCYTIC VESICLE MEMBRANE	22	0.0939863	0.21267	1.52223	1.30481	tags=55%, list=29%, signal=76%	tags=41%, list=20%, signal=51%	Others	Both
GO:0000776	KINETOCHORE	42	0.00135071	0.21325	2.11256	1.3036	tags=50%, list=19%, signal=62%	tags=57%, list=35%, signal=87%	Nucleus & Splicing	Both
GO:0097223	SPERM PART	53	0.0730416	0.213951	1.57194	1.30239	tags=43%, list=27%, signal=59%	tags=36%, list=21%, signal=45%	Unchanged	Unchanged
GO:0030667	SECRETORY GRANULE MEMBRANE	28	0.0571528	0.214437	1.61475	1.30128	tags=71%, list=43%, signal=125%	tags=68%, list=36%, signal=105%	Others	Both
GO:0000152	NUCLEAR UBIQUITIN LIGASE COMPLEX	22	0.970341	0.21693	0.551794	1.29925	tags=36%, list=37%, signal=57%	tags=23%, list=10%, signal=25%	Nucleus & Splicing	Dendrites
GO:0097517	CONTRACTILE ACTIN FILAMENT BUNDLE	24	0.0654358	0.21688	1.59233	1.29843	tags=54%, list=30%, signal=77%	tags=38%, list=16%, signal=44%	Cytoskeleton	Both
GO:0016528	SARCOPLASM	35	0.180651	0.218506	1.38869	1.29687	tags=43%, list=27%, signal=58%	tags=60%, list=35%, signal=92%	Unchanged	Unchanged
GO:0007268	CHEMICAL SYNAPTIC TRANSMISSION	74	0.0493451	0.226431	1.64354	1.29203	tags=42%, list=25%, signal=55%	tags=39%, list=22%, signal=50%	Synapse & Neurites	Both
GO:0042641	ACTOMYOSIN	31	0.0906728	0.228007	1.53157	1.29037	tags=61%, list=39%, signal=101%	tags=35%, list=16%, signal=42%	Cytoskeleton	Both
GO:0001725	STRESS FIBER	24	0.0686455	0.239104	1.58283	1.28401	tags=54%, list=30%, signal=77%	tags=38%, list=16%, signal=44%	Cytoskeleton	Both
GO:0030315	T-TUBULE	29	0.126175	0.24351	1.45319	1.28101	tags=55%, list=35%, signal=85%	tags=38%, list=17%, signal=46%	Unchanged	Unchanged
GO:0008328	IONOTROPIC GLUTAMATE RECEPTOR COMPLEX	32	0.372037	0.254086	1.17733	1.27482	tags=31%, list=20%, signal=39%	tags=38%, list=21%, signal=47%	Unchanged	Unchanged
GO:0030665	CLATHRIN-COATED VESICLE MEMBRANE	18	0.0417897	0.255312	1.67075	1.27348	tags=72%, list=37%, signal=114%	tags=39%, list=19%, signal=48%	Others	Somata
GO:0099563	MODIFICATION OF SYNAPTIC STRUCTURE	23	0.424408	0.256311	1.13569	1.27219	tags=78%, list=59%, signal=190%	tags=65%, list=35%, signal=100%	Unchanged	Unchanged
GO:0000779	CONDENSED CHROMOSOME, CENTROMERIC REGION	20	0.0152628	0.257232	1.82294	1.271	tags=50%, list=16%, signal=60%	tags=70%, list=36%, signal=110%	Nucleus & Splicing	Somata
GO:0000922	SPINDLE POLE	60	0.298434	0.25622	1.2519	1.27062	tags=30%, list=18%, signal=36%	tags=30%, list=20%, signal=37%	Unchanged	Unchanged
GO:0098878	NEUROTRANSMITTER RECEPTOR COMPLEX	32	0.384764	0.256081	1.16723	1.26995	tags=31%, list=20%, signal=39%	tags=38%, list=21%, signal=47%	Unchanged	Unchanged
GO:0101031	CHAPERONE COMPLEX	15	0	0.258518	2.44987	1.26803	tags=80%, list=19%, signal=99%	tags=87%, list=40%, signal=145%	Others	Somata
GO:0043204	PERIKARYON	86	0.000326844	0.262447	2.24702	1.2653	tags=67%, list=38%, signal=107%	tags=45%, list=27%, signal=61%	Others	Somata
GO:1903561	EXTRACELLULAR VESICLE	28	0.0078223	0.263765	1.90812	1.26385	tags=75%, list=40%, signal=125%	tags=54%, list=29%, signal=75%	Others	Somata
GO:0043230	EXTRACELLULAR ORGANELLE	29	0.0168715	0.264914	1.80695	1.26236	tags=72%, list=40%, signal=121%	tags=52%, list=29%, signal=72%	Others	Somata
GO:0019897	EXTRINSIC COMPONENT OF PLASMA MEMBRANE	76	0.47602	0.266791	1.08535	1.26056	tags=34%, list=27%, signal=46%	tags=51%, list=34%, signal=76%	Unchanged	Unchanged
GO:0042383	SARCOLEMMA	60	0.270502	0.278403	1.28368	1.25441	tags=48%, list=37%, signal=76%	tags=43%, list=30%, signal=61%	Unchanged	Unchanged
SYNGO:POSTSYNPROCESS	PROCESS IN THE POSTSYNAPSE	94	0.0195105	0.287563	1.78947	1.24922	tags=57%, list=39%, signal=93%	tags=55%, list=36%, signal=85%	Synapse & Neurites	Somata
GO:0099010	MODIFICATION OF POSTSYNAPTIC STRUCTURE	22	0.454335	0.287131	1.10511	1.24862	tags=77%, list=59%, signal=188%	tags=64%, list=35%, signal=98%	Unchanged	Unchanged
GO:0070062	EXTRACELLULAR EXOSOME	26	0.0252921	0.295565	1.74996	1.24401	tags=77%, list=44%, signal=136%	tags=50%, list=28%, signal=69%	Others	Somata
GO:0030863	CORTICAL CYTOSKELETON	58	0.112978	0.294997	1.48383	1.24338	tags=55%, list=40%, signal=90%	tags=40%, list=26%, signal=53%	Cytoskeleton	Somata
GO:0000315	ORGANELLAR LARGE RIBOSOMAL SUBUNIT	46	0.075354	0.306126	1.56681	1.23753	tags=74%, list=49%, signal=143%	tags=59%, list=35%, signal=90%	Mitochondria	Somata
GO:0099523	PRESYNAPTIC CYTOSOL	19	0.113875	0.306526	1.48164	1.23647	tags=47%, list=22%, signal=60%	tags=47%, list=23%, signal=61%	Synapse & Neurites	Somata
GO:0099537	TRANS-SYNAPTIC SIGNALING	94	0.108822	0.305656	1.49143	1.23605	tags=38%, list=25%, signal=50%	tags=37%, list=22%, signal=47%	Synapse & Neurites	Somata
GO:0099092	POSTSYNAPTIC DENSITY, INTRACELLULAR COMPONENT	19	0.46384	0.314027	1.09607	1.23162	tags=53%, list=40%, signal=88%	tags=32%, list=19%, signal=39%	Unchanged	Unchanged
GO:0099173	POSTSYNAPSE ORGANIZATION	35	0.239608	0.317753	1.31448	1.22921	tags=51%, list=37%, signal=81%	tags=60%, list=36%, signal=93%	Synapse & Neurites	Somata
GO:0099536	SYNAPTIC SIGNALING	94	0.102007	0.315969	1.50583	1.22913	tags=38%, list=25%, signal=50%	tags=37%, list=22%, signal=47%	Synapse & Neurites	Somata
GO:0072686	MITOTIC SPINDLE	42	0.067312	0.314501	1.58747	1.22892	tags=76%, list=55%, signal=169%	tags=40%, list=25%, signal=54%	Unchanged	Unchanged
GO:0005762	MITOCHONDRIAL LARGE RIBOSOMAL SUBUNIT	46	0.0848274	0.323568	1.54434	1.22414	tags=74%, list=49%, signal=143%	tags=59%, list=35%, signal=90%	Mitochondria	Somata
GO:0043198	DENDRITIC SHAFT	46	0.223612	0.32875	1.33435	1.22118	tags=52%, list=39%, signal=84%	tags=28%, list=18%, signal=34%	Synapse & Neurites	Somata
GO:0019867	OUTER MEMBRANE	92	0.0629454	0.33591	1.59917	1.21753	tags=65%, list=49%, signal=127%	tags=43%, list=31%, signal=62%	Mitochondria	Somata
GO:0098993	ANCHORED COMPONENT OF SYNAPTIC VESICLE MEMBRANE	16	0.120417	0.335383	1.46628	1.21691	tags=63%, list=34%, signal=94%	tags=81%, list=41%, signal=138%	Synapse & Neurites	Somata
GO:0042734	PRESYNAPTIC MEMBRANE	62	0.00215909	0.336699	2.06027	1.21548	tags=58%, list=33%, signal=86%	tags=32%, list=18%, signal=39%	Synapse & Neurites	Somata
GO:0005741	MITOCHONDRIAL OUTER MEMBRANE	86	0.0847919	0.341416	1.54562	1.21278	tags=65%, list=49%, signal=126%	tags=44%, list=31%, signal=63%	Mitochondria	Somata
GO:0030139	ENDOCYTIC VESICLE	75	0.203459	0.346283	1.35842	1.20993	tags=43%, list=30%, signal=60%	tags=56%, list=37%, signal=88%	Others	Somata
GO:0000313	ORGANELLAR RIBOSOME	69	0.0905987	0.353897	1.5299	1.20592	tags=86%, list=61%, signal=218%	tags=51%, list=30%, signal=72%	Mitochondria	Somata
GO:0031968	ORGANELLE OUTER MEMBRANE	92	0.0710328	0.354403	1.57707	1.20483	tags=65%, list=49%, signal=127%	tags=43%, list=31%, signal=62%	Mitochondria	Somata
GO:0005761	MITOCHONDRIAL RIBOSOME	69	0.0923875	0.358488	1.52594	1.20232	tags=86%, list=61%, signal=218%	tags=51%, list=30%, signal=72%	Mitochondria	Somata
GO:0042645	MITOCHONDRIAL NUCLEOID	27	0.297456	0.356565	1.25656	1.20225	tags=56%, list=39%, signal=91%	tags=41%, list=28%, signal=56%	Unchanged	Unchanged
GO:0016324	APICAL PLASMA MEMBRANE	79	0.155472	0.360859	1.41687	1.19971	tags=43%, list=30%, signal=61%	tags=32%, list=23%, signal=41%	Others	Somata
GO:1905369	ENDOPEPTIDASE COMPLEX	53	0	0.361716	2.76167	1.19852	tags=68%, list=24%, signal=88%	tags=62%, list=37%, signal=97%	Proteasome	Somata
GO:0009295	NUCLEOID	27	0.298026	0.363042	1.25513	1.19722	tags=56%, list=39%, signal=91%	tags=41%, list=28%, signal=56%	Unchanged	Unchanged
GO:0099175	REGULATION OF POSTSYNAPSE ORGANIZATION	26	0.432108	0.36169	1.12873	1.19695	tags=46%, list=34%, signal=70%	tags=58%, list=36%, signal=90%	Unchanged	Unchanged
GO:0044291	CELL-CELL CONTACT ZONE	38	0.0847973	0.365708	1.54684	1.19443	tags=55%, list=35%, signal=84%	tags=29%, list=14%, signal=34%	Others	Somata
GO:0099072	REGULATION OF POSTSYNAPTIC MEMBRANE NEUROTRANSMITTER RECEPTOR LEVELS	58	0.222639	0.369278	1.33423	1.19207	tags=52%, list=39%, signal=84%	tags=53%, list=36%, signal=83%	Synapse & Neurites	Somata
GO:0062023	COLLAGEN-CONTAINING EXTRACELLULAR MATRIX	29	0.879231	0.367392	0.721623	1.19202	tags=41%, list=39%, signal=68%	tags=28%, list=17%, signal=33%	Unchanged	Unchanged
GO:1905368	PEPTIDASE COMPLEX	67	0	0.369263	2.61062	1.19046	tags=61%, list=24%, signal=80%	tags=60%, list=37%, signal=93%	Proteasome	Somata
GO:0000502	PROTEASOME COMPLEX	52	0	0.384262	2.81922	1.1834	tags=69%, list=24%, signal=90%	tags=62%, list=37%, signal=96%	Proteasome	Somata
GO:0044448	CELL CORTEX PART	90	0.0624174	0.406555	1.60221	1.17415	tags=54%, list=40%, signal=89%	tags=38%, list=26%, signal=51%	Cytoskeleton	Somata
GO:0000775	CHROMOSOME, CENTROMERIC REGION	59	0.00846244	0.405111	1.89866	1.17385	tags=42%, list=19%, signal=52%	tags=46%, list=32%, signal=66%	Nucleus & Splicing	Somata
GO:0099522	REGION OF CYTOSOL	27	0.10307	0.404501	1.50216	1.1732	tags=74%, list=48%, signal=142%	tags=74%, list=43%, signal=129%	Synapse & Neurites	Somata
GO:0005604	BASEMENT MEMBRANE	20	0.892041	0.40336	0.701672	1.17283	tags=75%, list=66%, signal=217%	tags=25%, list=17%, signal=30%	Unchanged	Unchanged
GO:0032590	DENDRITE MEMBRANE	23	0.00720455	0.449778	1.9205	1.15475	tags=61%, list=28%, signal=85%	tags=43%, list=25%, signal=58%	Synapse & Neurites	Somata
GO:0098839	POSTSYNAPTIC DENSITY MEMBRANE	57	0.00657871	0.449621	1.93395	1.15395	tags=46%, list=22%, signal=58%	tags=51%, list=34%, signal=76%	Synapse & Neurites	Somata
GO:0000118	HISTONE DEACETYLASE COMPLEX	24	0.125755	0.460008	1.45462	1.14951	tags=67%, list=42%, signal=115%	tags=46%, list=30%, signal=65%	Nucleus & Splicing	Somata
GO:0008287	PROTEIN SERINE/THREONINE PHOSPHATASE COMPLEX	31	0.383912	0.466799	1.1668	1.14617	tags=81%, list=61%, signal=208%	tags=55%, list=34%, signal=83%	Unchanged	Unchanged
GO:0098884	POSTSYNAPTIC NEUROTRANSMITTER RECEPTOR ENDOCYTOSIS	20	0.0228479	0.464528	1.76339	1.14612	tags=60%, list=29%, signal=84%	tags=45%, list=22%, signal=58%	Synapse & Neurites	Somata
GO:0098862	CLUSTER OF ACTIN-BASED CELL PROJECTIONS	52	0.498234	0.469224	1.06232	1.14361	tags=56%, list=48%, signal=107%	tags=37%, list=26%, signal=49%	Unchanged	Unchanged
GO:0099505	REGULATION OF PRESYNAPTIC MEMBRANE POTENTIAL	26	0.00345753	0.470757	2.00939	1.14218	tags=69%, list=33%, signal=103%	tags=73%, list=44%, signal=130%	Synapse & Neurites	Somata
GO:0044853	PLASMA MEMBRANE RAFT	36	0.322786	0.473442	1.2254	1.14031	tags=50%, list=37%, signal=79%	tags=31%, list=17%, signal=36%	Unchanged	Unchanged
GO:0099507	LIGAND-GATED ION CHANNEL ACTIVITY INVOLVED IN REGULATION OF PRESYNAPTIC MEMBRANE POTENTIAL	15	0.01547	0.483642	1.81781	1.13585	tags=73%, list=33%, signal=109%	tags=67%, list=37%, signal=106%	Synapse & Neurites	Somata
GO:0005884	ACTIN FILAMENT	46	0.502199	0.49457	1.06332	1.13117	tags=50%, list=44%, signal=88%	tags=35%, list=26%, signal=47%	Unchanged	Unchanged
GO:0019005	SCF UBIQUITIN LIGASE COMPLEX	30	0.815253	0.496079	0.815457	1.12974	tags=60%, list=55%, signal=132%	tags=33%, list=24%, signal=44%	Unchanged	Unchanged
GO:0050804	MODULATION OF CHEMICAL SYNAPTIC TRANSMISSION	48	0.293667	0.503845	1.2604	1.12596	tags=73%, list=57%, signal=168%	tags=33%, list=21%, signal=42%	Unchanged	Unchanged
GO:0030864	CORTICAL ACTIN CYTOSKELETON	43	0.298938	0.502162	1.25357	1.12566	tags=51%, list=40%, signal=84%	tags=37%, list=28%, signal=51%	Unchanged	Unchanged
GO:0000792	HETEROCHROMATIN	41	0.348991	0.512653	1.19996	1.12103	tags=29%, list=17%, signal=35%	tags=27%, list=17%, signal=32%	Unchanged	Unchanged
GO:0005924	CELL-SUBSTRATE ADHERENS JUNCTION	65	0.603552	0.514604	0.988733	1.11951	tags=68%, list=61%, signal=173%	tags=26%, list=19%, signal=32%	Unchanged	Unchanged
GO:0017053	TRANSCRIPTIONAL REPRESSOR COMPLEX	35	0.43869	0.513197	1.12241	1.1191	tags=26%, list=12%, signal=29%	tags=37%, list=27%, signal=51%	Unchanged	Unchanged
GO:0005925	FOCAL ADHESION	64	0.583197	0.514794	1.00348	1.11769	tags=69%, list=61%, signal=175%	tags=27%, list=19%, signal=33%	Unchanged	Unchanged
GO:0060078	REGULATION OF POSTSYNAPTIC MEMBRANE POTENTIAL	26	0.00729942	0.515113	1.91824	1.11671	tags=73%, list=37%, signal=116%	tags=77%, list=46%, signal=142%	Synapse & Neurites	Somata
GO:0031519	PCG PROTEIN COMPLEX	24	0.874603	0.527045	0.733339	1.11163	tags=33%, list=31%, signal=48%	tags=25%, list=18%, signal=30%	Unchanged	Unchanged
GO:0035861	SITE OF DOUBLE-STRAND BREAK	24	0.192665	0.527711	1.37401	1.11055	tags=54%, list=35%, signal=83%	tags=25%, list=13%, signal=29%	Nucleus & Splicing	Somata
GO:0099645	NEUROTRANSMITTER RECEPTOR LOCALIZATION TO POSTSYNAPTIC SPECIALIZATION MEMBRANE	24	0.813757	0.525384	0.824143	1.11047	tags=58%, list=51%, signal=119%	tags=42%, list=28%, signal=58%	Unchanged	Unchanged
GO:0000421	AUTOPHAGOSOME MEMBRANE	17	0.439366	0.529652	1.11874	1.10802	tags=65%, list=47%, signal=122%	tags=59%, list=41%, signal=99%	Unchanged	Unchanged
GO:0030118	CLATHRIN COAT	25	0.0532364	0.537804	1.62886	1.10427	tags=60%, list=33%, signal=89%	tags=36%, list=22%, signal=46%	Others	Somata
GO:1903293	PHOSPHATASE COMPLEX	32	0.434151	0.535718	1.1263	1.10411	tags=78%, list=61%, signal=202%	tags=53%, list=34%, signal=80%	Unchanged	Unchanged
GO:0099056	INTEGRAL COMPONENT OF PRESYNAPTIC MEMBRANE	54	0.0104157	0.540811	1.87394	1.10148	tags=56%, list=33%, signal=82%	tags=30%, list=18%, signal=36%	Synapse & Neurites	Somata
GO:0005901	CAVEOLA	29	0.672356	0.54645	0.938953	1.09862	tags=45%, list=37%, signal=71%	tags=41%, list=29%, signal=58%	Unchanged	Unchanged
GO:0034399	NUCLEAR PERIPHERY	64	0.247685	0.549679	1.3068	1.0966	tags=50%, list=38%, signal=80%	tags=25%, list=20%, signal=31%	Nucleus & Splicing	Somata
GO:0099061	INTEGRAL COMPONENT OF POSTSYNAPTIC DENSITY MEMBRANE	42	0.00380257	0.55366	1.99565	1.09418	tags=48%, list=21%, signal=60%	tags=38%, list=23%, signal=49%	Synapse & Neurites	Somata
GO:0099560	SYNAPSE ADHESION BETWEEN PRE- AND POST-SYNAPSE	19	0.364218	0.556946	1.18556	1.09207	tags=79%, list=57%, signal=183%	tags=32%, list=17%, signal=38%	Unchanged	Unchanged
GO:1902911	PROTEIN KINASE COMPLEX	38	0.711762	0.560998	0.908272	1.08967	tags=53%, list=47%, signal=99%	tags=26%, list=15%, signal=31%	Unchanged	Unchanged
GO:0099055	INTEGRAL COMPONENT OF POSTSYNAPTIC MEMBRANE	44	0.0424125	0.56547	1.6668	1.08712	tags=55%, list=35%, signal=84%	tags=43%, list=31%, signal=62%	Synapse & Neurites	Somata
GO:0030136	CLATHRIN-COATED VESICLE	51	0.114807	0.56297	1.47732	1.08708	tags=45%, list=28%, signal=62%	tags=29%, list=21%, signal=37%	Others	Somata
GO:0045211	POSTSYNAPTIC MEMBRANE	56	0.0633802	0.564618	1.59928	1.0856	tags=52%, list=35%, signal=79%	tags=45%, list=33%, signal=66%	Synapse & Neurites	Somata
GO:0032154	CLEAVAGE FURROW	25	0.372547	0.57427	1.176	1.08123	tags=92%, list=68%, signal=289%	tags=56%, list=36%, signal=88%	Unchanged	Unchanged
GO:0030055	CELL-SUBSTRATE JUNCTION	67	0.67783	0.575548	0.934101	1.07988	tags=67%, list=61%, signal=171%	tags=25%, list=19%, signal=31%	Unchanged	Unchanged
GO:0098802	PLASMA MEMBRANE RECEPTOR COMPLEX	47	0.499615	0.593905	1.06262	1.07248	tags=40%, list=33%, signal=60%	tags=49%, list=36%, signal=76%	Unchanged	Unchanged
GO:0005777	PEROXISOME	58	0.119047	0.598661	1.47018	1.06984	tags=31%, list=16%, signal=36%	tags=41%, list=32%, signal=60%	Others	Somata
GO:0042579	MICROBODY	58	0.119032	0.596589	1.46903	1.06962	tags=31%, list=16%, signal=36%	tags=41%, list=32%, signal=60%	Others	Somata
GO:0005763	MITOCHONDRIAL SMALL RIBOSOMAL SUBUNIT	25	0.247369	0.602468	1.30599	1.06667	tags=92%, list=64%, signal=257%	tags=52%, list=30%, signal=74%	Mitochondria	Somata
GO:0032155	CELL DIVISION SITE PART	28	0.32795	0.604248	1.21867	1.06513	tags=93%, list=68%, signal=292%	tags=54%, list=36%, signal=84%	Unchanged	Unchanged
GO:0000314	ORGANELLAR SMALL RIBOSOMAL SUBUNIT	25	0.236415	0.628085	1.31888	1.05584	tags=92%, list=64%, signal=257%	tags=52%, list=30%, signal=74%	Mitochondria	Somata
GO:0005802	TRANS-GOLGI NETWORK	97	0.342062	0.628772	1.20675	1.05462	tags=59%, list=50%, signal=116%	tags=43%, list=36%, signal=66%	Unchanged	Unchanged
GO:0005838	PROTEASOME REGULATORY PARTICLE	21	0	0.630141	2.56295	1.05309	tags=81%, list=24%, signal=106%	tags=71%, list=45%, signal=129%	Proteasome	Somata
GO:0090734	SITE OF DNA DAMAGE	31	0.312806	0.65598	1.23444	1.04309	tags=48%, list=35%, signal=74%	tags=23%, list=13%, signal=26%	Unchanged	Unchanged
GO:0009897	EXTERNAL SIDE OF PLASMA MEMBRANE	39	0.237418	0.655792	1.31901	1.04214	tags=62%, list=45%, signal=112%	tags=51%, list=36%, signal=80%	Others	Somata
GO:0010494	CYTOPLASMIC STRESS GRANULE	35	0.0384154	0.669873	1.68474	1.03614	tags=69%, list=41%, signal=116%	tags=66%, list=43%, signal=115%	Others	Somata
GO:0030120	VESICLE COAT	35	0.04246	0.679208	1.66582	1.03177	tags=54%, list=31%, signal=78%	tags=26%, list=20%, signal=32%	Others	Somata
GO:0032153	CELL DIVISION SITE	30	0.461474	0.683552	1.09856	1.02921	tags=87%, list=68%, signal=272%	tags=57%, list=41%, signal=95%	Unchanged	Unchanged
GO:0055037	RECYCLING ENDOSOME	78	0.371375	0.694884	1.17879	1.02417	tags=78%, list=64%, signal=217%	tags=55%, list=46%, signal=100%	Unchanged	Unchanged
GO:0000786	NUCLEOSOME	15	0.70665	0.70268	0.913016	1.02028	tags=33%, list=20%, signal=42%	tags=33%, list=16%, signal=40%	Unchanged	Unchanged
GO:0030137	COPI-COATED VESICLE	28	0.20566	0.701308	1.35445	1.01974	tags=54%, list=34%, signal=81%	tags=57%, list=43%, signal=100%	Others	Somata
GO:1904315	TRANSMITTER-GATED ION CHANNEL ACTIVITY INVOLVED IN REGULATION OF POSTSYNAPTIC MEMBRANE POTENTIAL	20	0.0259657	0.700206	1.745	1.01908	tags=70%, list=37%, signal=111%	tags=75%, list=46%, signal=139%	Synapse & Neurites	Somata
GO:0001669	ACROSOMAL VESICLE	29	0.42573	0.719388	1.13591	1.01111	tags=69%, list=54%, signal=150%	tags=38%, list=30%, signal=54%	Unchanged	Unchanged
GO:0070993	TRANSLATION PREINITIATION COMPLEX	15	0.0406506	0.718547	1.67496	1.01032	tags=87%, list=45%, signal=157%	tags=40%, list=20%, signal=50%	Translation	Somata
GO:2000300	REGULATION OF SYNAPTIC VESICLE EXOCYTOSIS	17	0.839692	0.720875	0.785102	1.00841	tags=59%, list=53%, signal=124%	tags=29%, list=22%, signal=38%	Unchanged	Unchanged
GO:1902554	SERINE/THREONINE PROTEIN KINASE COMPLEX	30	0.957575	0.719891	0.599899	1.00766	tags=63%, list=62%, signal=166%	tags=23%, list=15%, signal=27%	Unchanged	Unchanged
GO:0000932	P-BODY	36	0.299052	0.726846	1.25044	1.00397	tags=39%, list=24%, signal=51%	tags=44%, list=32%, signal=65%	Unchanged	Unchanged
GO:0031312	EXTRINSIC COMPONENT OF ORGANELLE MEMBRANE	40	0.193005	0.723941	1.37186	1.00395	tags=45%, list=30%, signal=64%	tags=48%, list=38%, signal=76%	Others	Somata
GO:0005689	U12-TYPE SPLICEOSOMAL COMPLEX	16	0.666062	0.743098	0.946992	0.995729	tags=56%, list=42%, signal=97%	tags=44%, list=27%, signal=60%	Unchanged	Unchanged
GO:0051963	REGULATION OF SYNAPSE ASSEMBLY	21	0.192956	0.742955	1.37286	0.994654	tags=38%, list=20%, signal=47%	tags=33%, list=23%, signal=43%	Synapse & Neurites	Somata
GO:0098687	CHROMOSOMAL REGION	100	0.104538	0.740148	1.49913	0.994593	tags=33%, list=20%, signal=40%	tags=43%, list=37%, signal=67%	Nucleus & Splicing	Somata
GO:0022624	PROTEASOME ACCESSORY COMPLEX	24	8.48328e-05	0.739394	2.34866	0.993755	tags=71%, list=24%, signal=93%	tags=75%, list=50%, signal=148%	Proteasome	Somata
GO:0031306	INTRINSIC COMPONENT OF MITOCHONDRIAL OUTER MEMBRANE	17	0.32139	0.738172	1.22538	0.993137	tags=82%, list=59%, signal=200%	tags=24%, list=10%, signal=26%	Unchanged	Unchanged
GO:0016605	PML BODY	45	0.798886	0.738693	0.840055	0.991824	tags=62%, list=58%, signal=146%	tags=47%, list=40%, signal=77%	Unchanged	Unchanged
GO:0099634	POSTSYNAPTIC SPECIALIZATION MEMBRANE	17	0.0678232	0.740399	1.58542	0.990083	tags=71%, list=39%, signal=115%	tags=65%, list=44%, signal=116%	Synapse & Neurites	Somata
GO:0031012	EXTRACELLULAR MATRIX	49	0.842058	0.738	0.780951	0.989883	tags=20%, list=16%, signal=24%	tags=22%, list=18%, signal=27%	Unchanged	Unchanged
GO:0031307	INTEGRAL COMPONENT OF MITOCHONDRIAL OUTER MEMBRANE	17	0.313243	0.737215	1.2381	0.989033	tags=82%, list=59%, signal=200%	tags=24%, list=10%, signal=26%	Unchanged	Unchanged
GO:0043235	RECEPTOR COMPLEX	88	0.314046	0.739757	1.23455	0.986894	tags=42%, list=34%, signal=63%	tags=55%, list=44%, signal=97%	Unchanged	Unchanged
GO:0099060	INTEGRAL COMPONENT OF POSTSYNAPTIC SPECIALIZATION MEMBRANE	16	0.0905671	0.753696	1.53075	0.980268	tags=69%, list=38%, signal=110%	tags=69%, list=44%, signal=123%	Synapse & Neurites	Somata
GO:1904949	ATPASE COMPLEX	51	0.44009	0.754202	1.1194	0.97888	tags=65%, list=54%, signal=140%	tags=33%, list=26%, signal=45%	Unchanged	Unchanged
GO:0007416	SYNAPSE ASSEMBLY	43	0.200684	0.761754	1.36285	0.974734	tags=35%, list=20%, signal=43%	tags=40%, list=31%, signal=57%	Synapse & Neurites	Somata
GO:0098698	POSTSYNAPTIC SPECIALIZATION ASSEMBLY	19	0.324864	0.76645	1.22195	0.971734	tags=37%, list=19%, signal=45%	tags=42%, list=31%, signal=61%	Unchanged	Unchanged
GO:0048475	COATED MEMBRANE	58	0.220758	0.769283	1.33787	0.969375	tags=47%, list=33%, signal=68%	tags=53%, list=43%, signal=93%	Others	Somata
GO:0030117	MEMBRANE COAT	58	0.208377	0.767015	1.35118	0.969115	tags=47%, list=33%, signal=68%	tags=53%, list=43%, signal=93%	Others	Somata
GO:0016323	BASOLATERAL PLASMA MEMBRANE	66	0.854819	0.766268	0.757503	0.968253	tags=15%, list=11%, signal=17%	tags=11%, list=7%, signal=11%	Unchanged	Unchanged
GO:0000803	SEX CHROMOSOME	19	0.331802	0.770595	1.21496	0.965331	tags=42%, list=26%, signal=57%	tags=26%, list=17%, signal=32%	Unchanged	Unchanged
GO:0030496	MIDBODY	76	0.501009	0.781016	1.0629	0.959858	tags=46%, list=40%, signal=75%	tags=45%, list=38%, signal=72%	Unchanged	Unchanged
GO:0044815	DNA PACKAGING COMPLEX	17	0.811623	0.801567	0.823716	0.950071	tags=29%, list=20%, signal=37%	tags=29%, list=16%, signal=35%	Unchanged	Unchanged
GO:0098852	LYTIC VACUOLE MEMBRANE	70	0.45187	0.811654	1.10766	0.944613	tags=49%, list=40%, signal=80%	tags=43%, list=40%, signal=71%	Unchanged	Unchanged
GO:0005765	LYSOSOMAL MEMBRANE	70	0.441402	0.813571	1.11969	0.942512	tags=49%, list=40%, signal=80%	tags=43%, list=40%, signal=71%	Unchanged	Unchanged
GO:0016363	NUCLEAR MATRIX	52	0.358897	0.827275	1.19215	0.935204	tags=87%, list=70%, signal=283%	tags=44%, list=41%, signal=74%	Unchanged	Unchanged
GO:0015030	CAJAL BODY	21	0.711875	0.85277	0.906616	0.922515	tags=71%, list=59%, signal=173%	tags=33%, list=25%, signal=44%	Unchanged	Unchanged
GO:0044439	PEROXISOMAL PART	32	0.452018	0.860528	1.10868	0.917581	tags=28%, list=14%, signal=33%	tags=53%, list=42%, signal=90%	Unchanged	Unchanged
GO:0044438	MICROBODY PART	32	0.425955	0.861775	1.13365	0.91556	tags=28%, list=14%, signal=33%	tags=53%, list=42%, signal=90%	Unchanged	Unchanged
GO:0030119	AP-TYPE MEMBRANE COAT ADAPTOR COMPLEX	21	0.460886	0.859873	1.10002	0.914956	tags=52%, list=37%, signal=82%	tags=24%, list=19%, signal=29%	Unchanged	Unchanged
GO:0005788	ENDOPLASMIC RETICULUM LUMEN	33	0.0312627	0.866579	1.71816	0.910355	tags=64%, list=38%, signal=101%	tags=39%, list=37%, signal=62%	Others	Somata
GO:0055038	RECYCLING ENDOSOME MEMBRANE	34	0.363314	0.886452	1.18712	0.899269	tags=68%, list=51%, signal=138%	tags=56%, list=45%, signal=101%	Unchanged	Unchanged
GO:0005798	GOLGI-ASSOCIATED VESICLE	88	0.112461	0.887924	1.48545	0.896939	tags=44%, list=31%, signal=63%	tags=45%, list=43%, signal=79%	Others	Somata
GO:0031461	CULLIN-RING UBIQUITIN LIGASE COMPLEX	87	0.848991	0.889515	0.766688	0.894679	tags=59%, list=57%, signal=134%	tags=26%, list=24%, signal=34%	Unchanged	Unchanged
GO:0031227	INTRINSIC COMPONENT OF ENDOPLASMIC RETICULUM MEMBRANE	69	0.0501971	0.898113	1.63832	0.888777	tags=62%, list=43%, signal=108%	tags=51%, list=44%, signal=89%	Others	Somata
GO:0005811	LIPID DROPLET	27	0.773219	0.896003	0.860679	0.888218	tags=81%, list=69%, signal=266%	tags=44%, list=39%, signal=72%	Unchanged	Unchanged
GO:0030176	INTEGRAL COMPONENT OF ENDOPLASMIC RETICULUM MEMBRANE	67	0.0493712	0.899452	1.64465	0.884889	tags=63%, list=43%, signal=109%	tags=51%, list=44%, signal=89%	Others	Somata
GO:0000793	CONDENSED CHROMOSOME	48	0.198899	0.903737	1.36522	0.881026	tags=50%, list=37%, signal=79%	tags=50%, list=42%, signal=86%	Nucleus & Splicing	Somata
GO:0098974	POSTSYNAPTIC ACTIN CYTOSKELETON ORGANIZATION	16	0.203764	0.913961	1.3591	0.874161	tags=63%, list=37%, signal=99%	tags=38%, list=25%, signal=50%	Synapse & Neurites	Somata
GO:0030662	COATED VESICLE MEMBRANE	53	0.286054	0.914228	1.26792	0.872291	tags=47%, list=34%, signal=71%	tags=51%, list=45%, signal=92%	Unchanged	Unchanged
GO:0000794	CONDENSED NUCLEAR CHROMOSOME	19	0.847664	0.929898	0.77007	0.861857	tags=84%, list=71%, signal=292%	tags=58%, list=42%, signal=100%	Unchanged	Unchanged
GO:0032993	PROTEIN-DNA COMPLEX	47	0.716152	0.929463	0.902473	0.860269	tags=28%, list=20%, signal=35%	tags=34%, list=31%, signal=49%	Unchanged	Unchanged
GO:0032580	GOLGI CISTERNA MEMBRANE	25	0.824519	0.930913	0.800555	0.85768	tags=72%, list=63%, signal=193%	tags=20%, list=17%, signal=24%	Unchanged	Unchanged
GO:0031902	LATE ENDOSOME MEMBRANE	53	0.471691	0.947923	1.089	0.845754	tags=49%, list=40%, signal=81%	tags=40%, list=36%, signal=61%	Unchanged	Unchanged
GO:0071782	ENDOPLASMIC RETICULUM TUBULAR NETWORK	20	0.240504	0.952306	1.31471	0.841201	tags=60%, list=39%, signal=98%	tags=35%, list=31%, signal=50%	Others	Somata
GO:0080008	CUL4-RING E3 UBIQUITIN LIGASE COMPLEX	21	0.491711	0.956186	1.07334	0.8369	tags=86%, list=64%, signal=240%	tags=67%, list=52%, signal=137%	Unchanged	Unchanged
GO:0031463	CUL3-RING UBIQUITIN LIGASE COMPLEX	23	0.931525	0.953518	0.646123	0.836496	tags=78%, list=72%, signal=280%	tags=70%, list=56%, signal=156%	Unchanged	Unchanged
GO:0036064	CILIARY BASAL BODY	43	0.669413	0.952736	0.94219	0.834943	tags=47%, list=41%, signal=79%	tags=33%, list=30%, signal=46%	Unchanged	Unchanged
GO:0031903	MICROBODY MEMBRANE	25	0.524752	0.955987	1.04407	0.828769	tags=28%, list=14%, signal=33%	tags=56%, list=45%, signal=101%	Unchanged	Unchanged
GO:0045171	INTERCELLULAR BRIDGE	23	0.843066	0.956257	0.775942	0.826435	tags=87%, list=73%, signal=322%	tags=26%, list=17%, signal=31%	Unchanged	Unchanged
GO:0005643	NUCLEAR PORE	26	0.497519	0.959529	1.06854	0.822144	tags=42%, list=31%, signal=61%	tags=31%, list=31%, signal=45%	Unchanged	Unchanged
GO:0030663	COPI-COATED VESICLE MEMBRANE	18	0.573741	0.957738	1.01285	0.821173	tags=56%, list=39%, signal=91%	tags=67%, list=52%, signal=140%	Unchanged	Unchanged
GO:0035869	CILIARY TRANSITION ZONE	20	0.68588	0.958916	0.927535	0.818107	tags=45%, list=36%, signal=70%	tags=50%, list=45%, signal=91%	Unchanged	Unchanged
GO:0005778	PEROXISOMAL MEMBRANE	25	0.519112	0.957581	1.04841	0.816833	tags=28%, list=14%, signal=33%	tags=56%, list=45%, signal=101%	Unchanged	Unchanged
GO:0044798	NUCLEAR TRANSCRIPTION FACTOR COMPLEX	69	0.967762	0.975743	0.562749	0.801876	tags=19%, list=20%, signal=23%	tags=22%, list=25%, signal=29%	Unchanged	Unchanged
GO:0070603	SWI/SNF SUPERFAMILY-TYPE COMPLEX	42	0.574794	0.975616	1.01105	0.799666	tags=71%, list=61%, signal=183%	tags=31%, list=26%, signal=42%	Unchanged	Unchanged
GO:0070160	TIGHT JUNCTION	30	0.671577	0.975506	0.942303	0.797356	tags=63%, list=53%, signal=135%	tags=53%, list=46%, signal=98%	Unchanged	Unchanged
GO:0044452	NUCLEOLAR PART	90	0.841812	0.972527	0.779054	0.797202	tags=69%, list=66%, signal=198%	tags=32%, list=35%, signal=49%	Unchanged	Unchanged
GO:0090575	RNA POLYMERASE II TRANSCRIPTION FACTOR COMPLEX	56	0.966852	0.972836	0.579694	0.794472	tags=45%, list=48%, signal=86%	tags=21%, list=25%, signal=28%	Unchanged	Unchanged
GO:0030904	RETROMER COMPLEX	15	0.305357	0.980211	1.24474	0.786359	tags=80%, list=52%, signal=166%	tags=67%, list=51%, signal=135%	Unchanged	Unchanged
GO:0031901	EARLY ENDOSOME MEMBRANE	47	0.75044	0.986399	0.877398	0.778664	tags=57%, list=52%, signal=118%	tags=66%, list=56%, signal=148%	Unchanged	Unchanged
GO:1902562	H4 HISTONE ACETYLTRANSFERASE COMPLEX	25	0.883461	0.984696	0.712584	0.777445	tags=60%, list=55%, signal=134%	tags=16%, list=19%, signal=20%	Unchanged	Unchanged
GO:0071013	CATALYTIC STEP 2 SPLICEOSOME	55	0.190079	0.986591	1.37849	0.773194	tags=73%, list=56%, signal=165%	tags=38%, list=39%, signal=62%	Nucleus & Splicing	Somata
GO:0099188	POSTSYNAPTIC CYTOSKELETON ORGANIZATION	19	0.27266	0.986306	1.28096	0.770652	tags=58%, list=37%, signal=91%	tags=32%, list=25%, signal=42%	Unchanged	Unchanged
GO:0030660	GOLGI-ASSOCIATED VESICLE MEMBRANE	47	0.388578	0.988961	1.16277	0.765345	tags=43%, list=31%, signal=61%	tags=45%, list=43%, signal=78%	Unchanged	Unchanged
GO:0071005	U2-TYPE PRECATALYTIC SPLICEOSOME	28	0.636205	0.987079	0.966207	0.76405	tags=68%, list=56%, signal=154%	tags=39%, list=36%, signal=61%	Unchanged	Unchanged
GO:0097526	SPLICEOSOMAL TRI-SNRNP COMPLEX	21	0.87603	0.986803	0.729556	0.761441	tags=62%, list=56%, signal=141%	tags=38%, list=36%, signal=59%	Unchanged	Unchanged
GO:0046540	U4/U6 X U5 TRI-SNRNP COMPLEX	21	0.877272	0.988043	0.726068	0.75422	tags=62%, list=56%, signal=141%	tags=38%, list=36%, signal=59%	Unchanged	Unchanged
GO:0005923	BICELLULAR TIGHT JUNCTION	27	0.856852	0.986378	0.758103	0.752748	tags=59%, list=53%, signal=127%	tags=52%, list=46%, signal=96%	Unchanged	Unchanged
GO:0005793	ENDOPLASMIC RETICULUM-GOLGI INTERMEDIATE COMPARTMENT	43	0.0805211	0.985927	1.55663	0.750202	tags=63%, list=41%, signal=106%	tags=58%, list=54%, signal=125%	Others	Somata
GO:0071011	PRECATALYTIC SPLICEOSOME	29	0.576105	0.986204	1.0091	0.746868	tags=62%, list=50%, signal=123%	tags=38%, list=36%, signal=59%	Unchanged	Unchanged
GO:0000407	PHAGOPHORE ASSEMBLY SITE	17	0.44462	0.995814	1.11427	0.733909	tags=76%, list=55%, signal=171%	tags=41%, list=36%, signal=64%	Unchanged	Unchanged
GO:0005913	CELL-CELL ADHERENS JUNCTION	38	0.602241	1	0.990794	0.718554	tags=45%, list=38%, signal=71%	tags=24%, list=25%, signal=31%	Unchanged	Unchanged
GO:0001650	FIBRILLAR CENTER	71	0.811186	1	0.822091	0.713202	tags=72%, list=67%, signal=213%	tags=31%, list=35%, signal=47%	Unchanged	Unchanged
GO:0044450	MICROTUBULE ORGANIZING CENTER PART	86	0.958412	1	0.602921	0.706615	tags=40%, list=41%, signal=67%	tags=55%, list=54%, signal=116%	Unchanged	Unchanged
GO:0005814	CENTRIOLE	41	0.910634	1	0.676456	0.70431	tags=66%, list=63%, signal=178%	tags=56%, list=52%, signal=116%	Unchanged	Unchanged
GO:0005795	GOLGI STACK	58	0.733503	1	0.889779	0.702981	tags=48%, list=46%, signal=89%	tags=34%, list=38%, signal=55%	Unchanged	Unchanged
GO:0000784	NUCLEAR CHROMOSOME, TELOMERIC REGION	33	0.911553	1	0.678407	0.702203	tags=24%, list=20%, signal=30%	tags=42%, list=40%, signal=71%	Unchanged	Unchanged
GO:0043296	APICAL JUNCTION COMPLEX	37	0.866629	1	0.745056	0.702088	tags=76%, list=68%, signal=238%	tags=46%, list=46%, signal=85%	Unchanged	Unchanged
GO:0071007	U2-TYPE CATALYTIC STEP 2 SPLICEOSOME	18	0.548658	1	1.02874	0.696295	tags=56%, list=42%, signal=96%	tags=22%, list=21%, signal=28%	Unchanged	Unchanged
GO:0031985	GOLGI CISTERNA	39	0.866404	1	0.742952	0.691315	tags=46%, list=46%, signal=84%	tags=15%, list=17%, signal=18%	Unchanged	Unchanged
GO:0030532	SMALL NUCLEAR RIBONUCLEOPROTEIN COMPLEX	37	0.281727	1	1.27221	0.690138	tags=70%, list=54%, signal=151%	tags=32%, list=32%, signal=47%	Unchanged	Unchanged
GO:1902493	ACETYLTRANSFERASE COMPLEX	52	0.827239	1	0.802418	0.681507	tags=60%, list=55%, signal=132%	tags=21%, list=26%, signal=28%	Unchanged	Unchanged
GO:0031248	PROTEIN ACETYLTRANSFERASE COMPLEX	52	0.8264	1	0.801131	0.680572	tags=60%, list=55%, signal=132%	tags=21%, list=26%, signal=28%	Unchanged	Unchanged
GO:0034451	CENTRIOLAR SATELLITE	35	0.884677	0.998726	0.714089	0.678926	tags=43%, list=40%, signal=71%	tags=54%, list=54%, signal=116%	Unchanged	Unchanged
GO:0008023	TRANSCRIPTION ELONGATION FACTOR COMPLEX	33	0.928683	0.998612	0.653104	0.669184	tags=64%, list=61%, signal=164%	tags=52%, list=55%, signal=114%	Unchanged	Unchanged
GO:0097525	SPLICEOSOMAL SNRNP COMPLEX	35	0.341908	0.996051	1.20585	0.668459	tags=69%, list=54%, signal=147%	tags=31%, list=32%, signal=46%	Unchanged	Unchanged
GO:0016591	RNA POLYMERASE II, HOLOENZYME	40	0.503239	0.99346	1.06386	0.667754	tags=63%, list=51%, signal=128%	tags=28%, list=30%, signal=39%	Unchanged	Unchanged
GO:0000123	HISTONE ACETYLTRANSFERASE COMPLEX	46	0.967881	0.989282	0.550982	0.664758	tags=54%, list=55%, signal=121%	tags=22%, list=26%, signal=29%	Unchanged	Unchanged
GO:0033116	ENDOPLASMIC RETICULUM-GOLGI INTERMEDIATE COMPARTMENT MEMBRANE	16	0.368294	0.995495	1.1819	0.648344	tags=63%, list=41%, signal=106%	tags=69%, list=59%, signal=166%	Unchanged	Unchanged
GO:0000781	CHROMOSOME, TELOMERIC REGION	45	0.81161	0.994443	0.819886	0.644718	tags=24%, list=20%, signal=30%	tags=40%, list=40%, signal=66%	Unchanged	Unchanged
GO:0005657	REPLICATION FORK	19	0.9857	1	0.491145	0.618314	tags=53%, list=56%, signal=118%	tags=5%, list=3%, signal=5%	Unchanged	Unchanged
GO:0120114	SM-LIKE PROTEIN FAMILY COMPLEX	41	0.314135	1	1.23548	0.610749	tags=68%, list=54%, signal=146%	tags=41%, list=45%, signal=75%	Unchanged	Unchanged
GO:0034708	METHYLTRANSFERASE COMPLEX	51	0.9857	1	0.480503	0.592649	tags=49%, list=53%, signal=103%	tags=22%, list=26%, signal=29%	Unchanged	Unchanged
GO:0005684	U2-TYPE SPLICEOSOMAL COMPLEX	51	0.23641	1	1.32083	0.584585	tags=65%, list=50%, signal=128%	tags=25%, list=29%, signal=36%	Nucleus & Splicing	Somata
GO:0099023	TETHERING COMPLEX	36	0.974135	1	0.531144	0.5667	tags=67%, list=66%, signal=193%	tags=6%, list=4%, signal=6%	Unchanged	Unchanged
GO:0000428	DNA-DIRECTED RNA POLYMERASE COMPLEX	51	0.800192	1	0.837371	0.560059	tags=57%, list=51%, signal=116%	tags=65%, list=64%, signal=181%	Unchanged	Unchanged
GO:0055029	NUCLEAR DNA-DIRECTED RNA POLYMERASE COMPLEX	51	0.788062	1	0.849201	0.556543	tags=57%, list=51%, signal=116%	tags=65%, list=64%, signal=181%	Unchanged	Unchanged
GO:0030880	RNA POLYMERASE COMPLEX	51	0.798321	1	0.836742	0.555442	tags=57%, list=51%, signal=116%	tags=65%, list=64%, signal=181%	Unchanged	Unchanged
GO:0000791	EUCHROMATIN	18	0.820293	1	0.809672	0.555326	tags=50%, list=44%, signal=89%	tags=56%, list=58%, signal=131%	Unchanged	Unchanged
GO:0005719	NUCLEAR EUCHROMATIN	16	0.968788	1	0.566224	0.540093	tags=44%, list=44%, signal=78%	tags=56%, list=58%, signal=132%	Unchanged	Unchanged
GO:0012507	ER TO GOLGI TRANSPORT VESICLE MEMBRANE	18	0.964749	0.996724	0.578234	0.529934	tags=72%, list=68%, signal=223%	tags=78%, list=68%, signal=244%	Unchanged	Unchanged
GO:0030134	COPII-COATED ER TO GOLGI TRANSPORT VESICLE	36	0.932791	0.998772	0.641257	0.504163	tags=31%, list=29%, signal=43%	tags=47%, list=51%, signal=96%	Unchanged	Unchanged
GO:0005801	CIS-GOLGI NETWORK	25	0.23203	1	1.32527	0.439908	tags=60%, list=41%, signal=101%	tags=28%, list=36%, signal=43%	Others	Somata
GO:0035097	HISTONE METHYLTRANSFERASE COMPLEX	37	0.989339	1	0.450699	0.431773	tags=49%, list=53%, signal=103%	tags=19%, list=26%, signal=26%	Unchanged	Unchanged
