# Supplementary material for: Subcellular sequencing of single neurons reveals the dendritic transcriptome of GABAergic interneurons
Source: eLife. 2021 Jan 6;10:e63092. doi: 10.7554/eLife.63092 (PMC7819707; doi:10.7554/eLife.63092)
Supplement: Supplementary file 7. — Related to methods. [file elife-63092-supp7.xlsx]

## Sheet: Sheet1
Oligo_ID	Use	Manufacturer	Sequence
ISPCR_UMI_Idx1_dT30	Reverse transcription	IDT	AAGCAGTGGTATCAACGCAGAGTACNNNNNNNNATAGAGAGTTTTTTTTTTTTTTTTTTTTTTTTTTTTTT
ISPCR_UMI_Idx2_dT30	Reverse transcription	IDT	AAGCAGTGGTATCAACGCAGAGTACNNNNNNNNAGAGGATATTTTTTTTTTTTTTTTTTTTTTTTTTTTTT
ISPCR_UMI_Idx3_dT30	Reverse transcription	IDT	AAGCAGTGGTATCAACGCAGAGTACNNNNNNNNCTCCTTACTTTTTTTTTTTTTTTTTTTTTTTTTTTTTT
ISPCR_UMI_Idx4_dT30	Reverse transcription	IDT	AAGCAGTGGTATCAACGCAGAGTACNNNNNNNNTATGCAGTTTTTTTTTTTTTTTTTTTTTTTTTTTTTTT
ISPCR_UMI_Idx5_dT30	Reverse transcription	IDT	AAGCAGTGGTATCAACGCAGAGTACNNNNNNNNTACTCCTTTTTTTTTTTTTTTTTTTTTTTTTTTTTTTT
ISPCR_UMI_Idx6_dT30	Reverse transcription	IDT	AAGCAGTGGTATCAACGCAGAGTACNNNNNNNNAGGCTTAGTTTTTTTTTTTTTTTTTTTTTTTTTTTTTT
ISPCR_UMI_Idx7_dT30	Reverse transcription	IDT	AAGCAGTGGTATCAACGCAGAGTACNNNNNNNNATTAGACGTTTTTTTTTTTTTTTTTTTTTTTTTTTTTT
ISPCR_UMI_Idx8_dT30	Reverse transcription	IDT	AAGCAGTGGTATCAACGCAGAGTACNNNNNNNNCGGAGAGATTTTTTTTTTTTTTTTTTTTTTTTTTTTTT
ISPCR_UMI_Idx9_dT30	Reverse transcription	IDT	AAGCAGTGGTATCAACGCAGAGTACNNNNNNNNCTAGTCGATTTTTTTTTTTTTTTTTTTTTTTTTTTTTT
ISPCR_UMI_Idx10_dT30	Reverse transcription	IDT	AAGCAGTGGTATCAACGCAGAGTACNNNNNNNNAGCTAGAATTTTTTTTTTTTTTTTTTTTTTTTTTTTTT
ISPCR_UMI_Idx11_dT30	Reverse transcription	IDT	AAGCAGTGGTATCAACGCAGAGTACNNNNNNNNACTCTAGGTTTTTTTTTTTTTTTTTTTTTTTTTTTTTT
ISPCR_UMI_Idx12_dT30	Reverse transcription	IDT	AAGCAGTGGTATCAACGCAGAGTACNNNNNNNNTCTTACGCTTTTTTTTTTTTTTTTTTTTTTTTTTTTTT
ISPCR_UMI_Idx13_dT30	Reverse transcription	IDT	AAGCAGTGGTATCAACGCAGAGTACNNNNNNNNCTTAATAGTTTTTTTTTTTTTTTTTTTTTTTTTTTTTT
ISPCR_UMI_Idx14_dT30	Reverse transcription	IDT	AAGCAGTGGTATCAACGCAGAGTACNNNNNNNNATAGCCTTTTTTTTTTTTTTTTTTTTTTTTTTTTTTTT
ISPCR_UMI_Idx15_dT30	Reverse transcription	IDT	AAGCAGTGGTATCAACGCAGAGTACNNNNNNNNTAAGGCTCTTTTTTTTTTTTTTTTTTTTTTTTTTTTTT
ISPCR_UMI_Idx16_dT30	Reverse transcription	IDT	AAGCAGTGGTATCAACGCAGAGTACNNNNNNNNTCGCATAATTTTTTTTTTTTTTTTTTTTTTTTTTTTTT
ISPCR_UMI_Idx17_dT30	Reverse transcription	IDT	AAGCAGTGGTATCAACGCAGAGTACNNNNNNNNATGGACTGTTTTTTTTTTTTTTTTTTTTTTTTTTTTTT
ISPCR_UMI_Idx18_dT30	Reverse transcription	IDT	AAGCAGTGGTATCAACGCAGAGTACNNNNNNNNATCTCGATTTTTTTTTTTTTTTTTTTTTTTTTTTTTTT
ISPCR_TSO_LNA	Template switching	Qiagen	AAGCAGTGGTATCAACGCAGAGTGAATrGrG+G
ISPCR	Pre-amplification PCR	IDT	AAGCAGTGGTATCAACGCAGAGT
P5_ISPCR	Library Amplification PCR	IDT	AATGATACGGCGACCACCGAGATCTACACGCCTGTCCGCGGAAGCAGTGGTATCAACGCAGAGTAC
Read1CustomSeqB	Sequencing	IDT	GCCTGTCCGCGGAAGCAGTGGTATCAACGCAGAGTAC
