# Supplementary figures and images for: Subcellular sequencing of single neurons reveals the dendritic transcriptome of GABAergic interneurons
Source: eLife journal article supplement (doi:10.7554/elife.63092), 2021-01-06

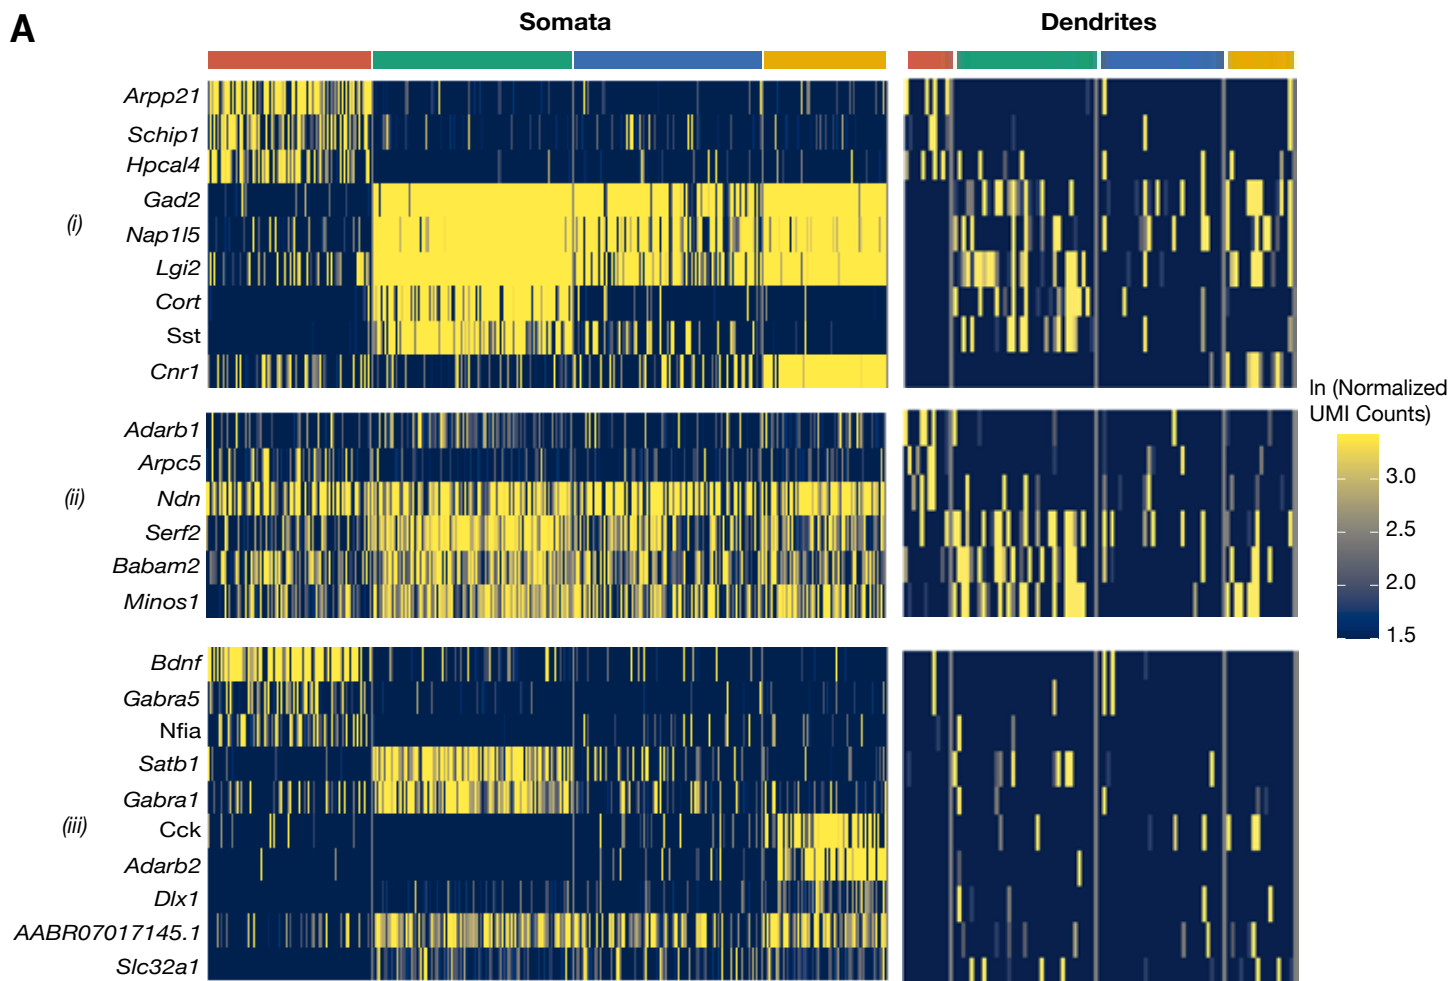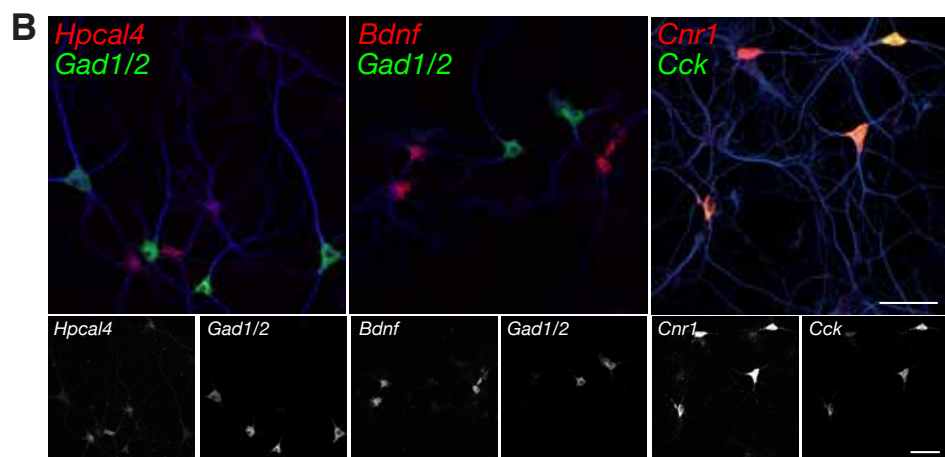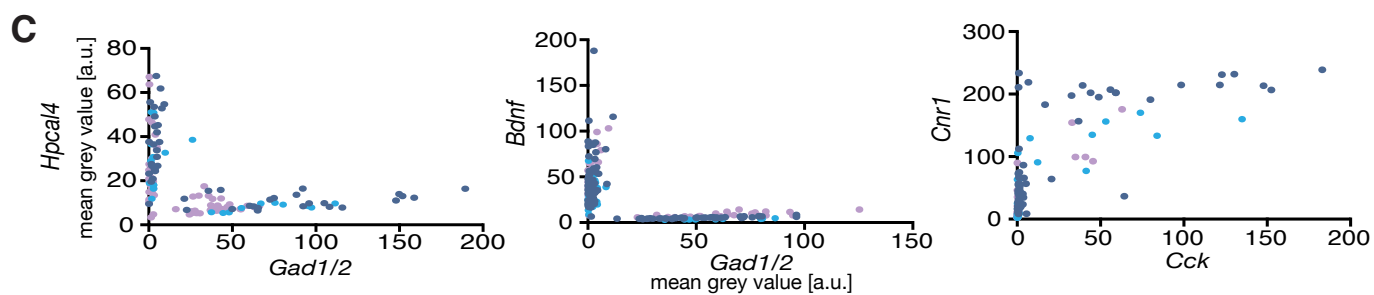

Supplement: supp [file elife-63092-supp-v1.zip]

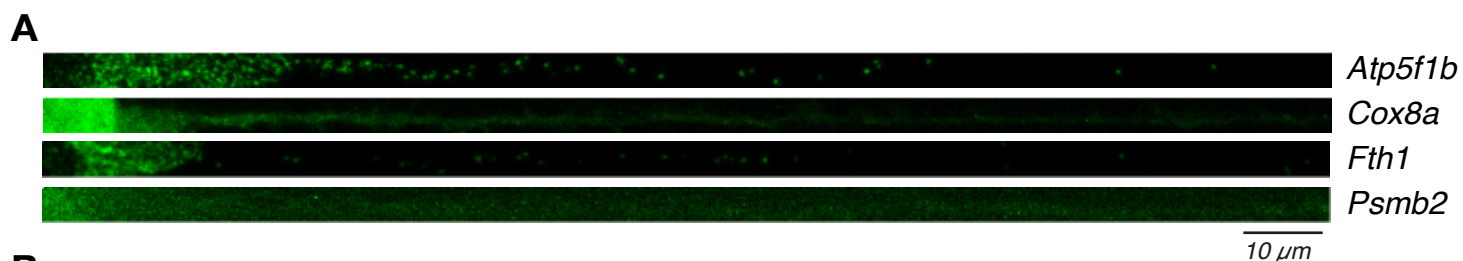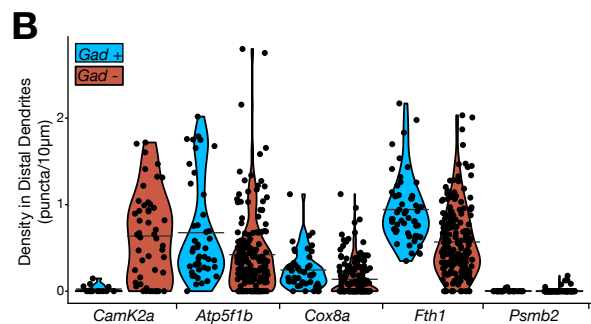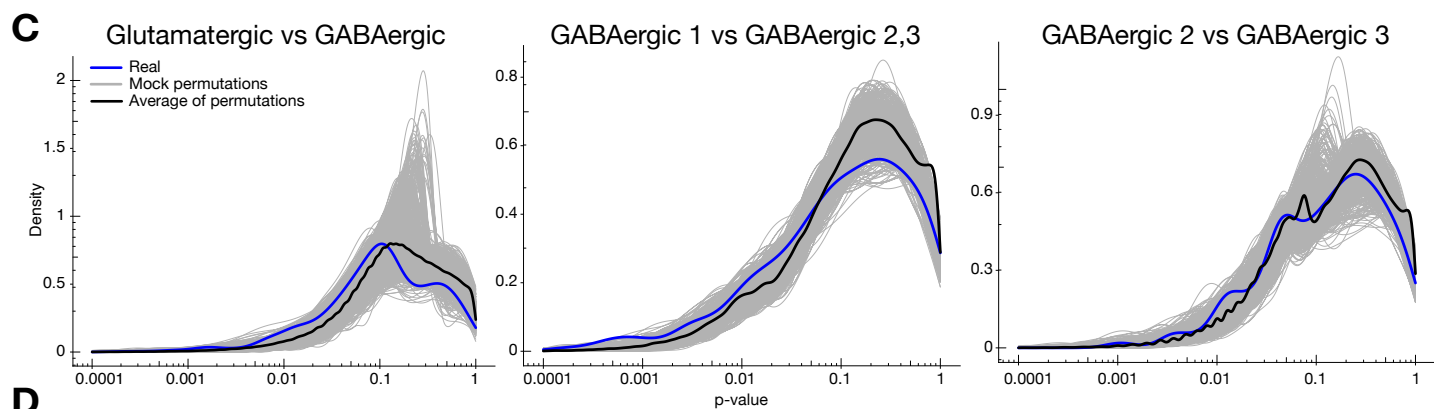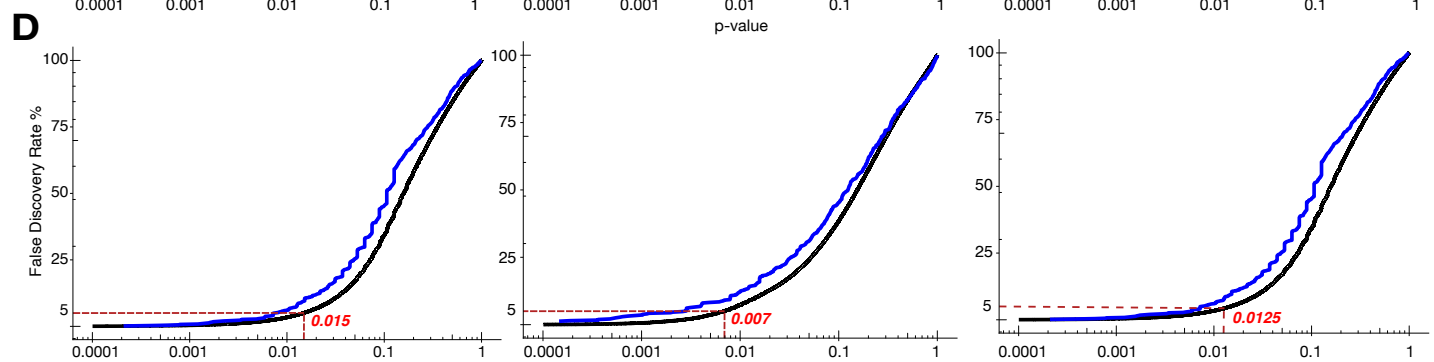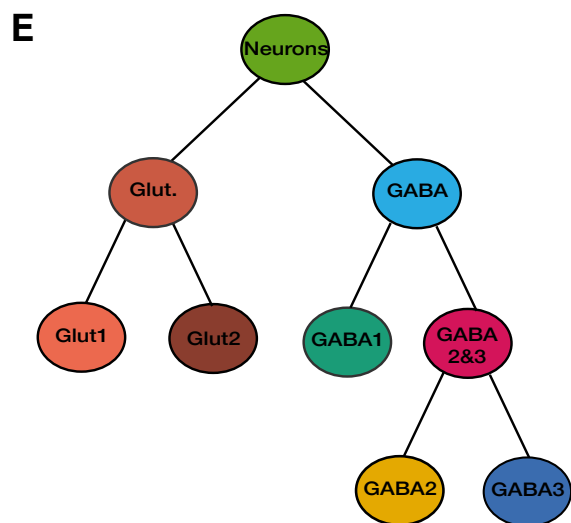

Supplement: supp [file elife-63092-supp-v1.zip]

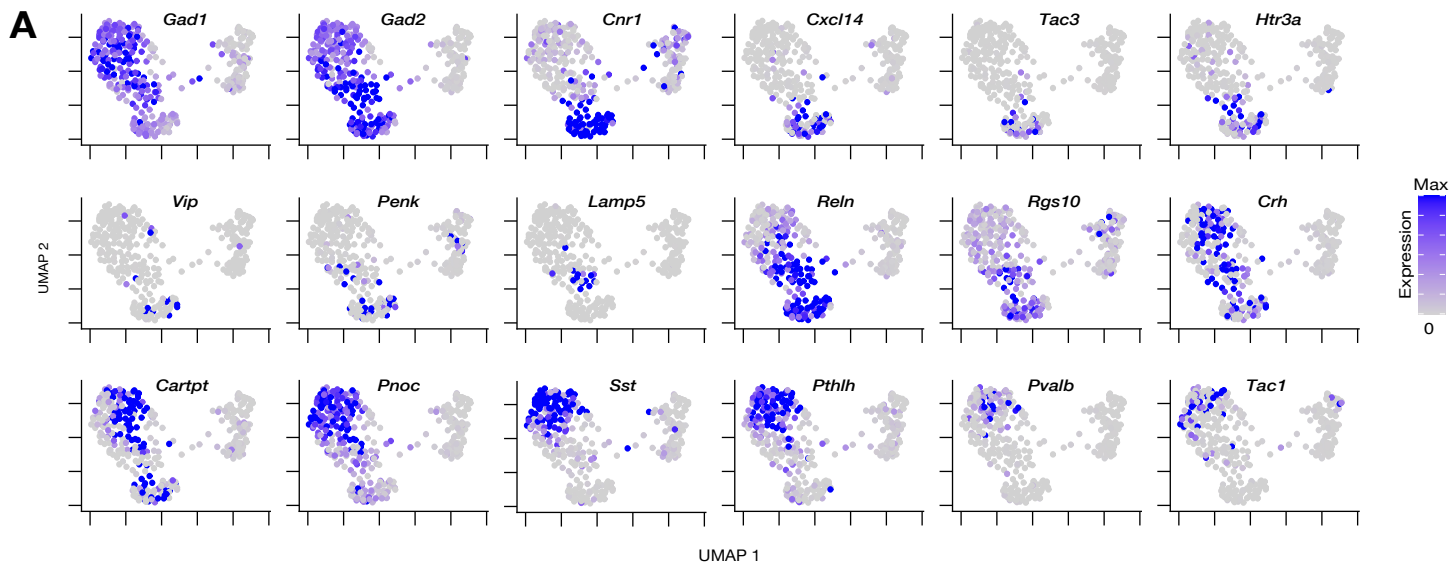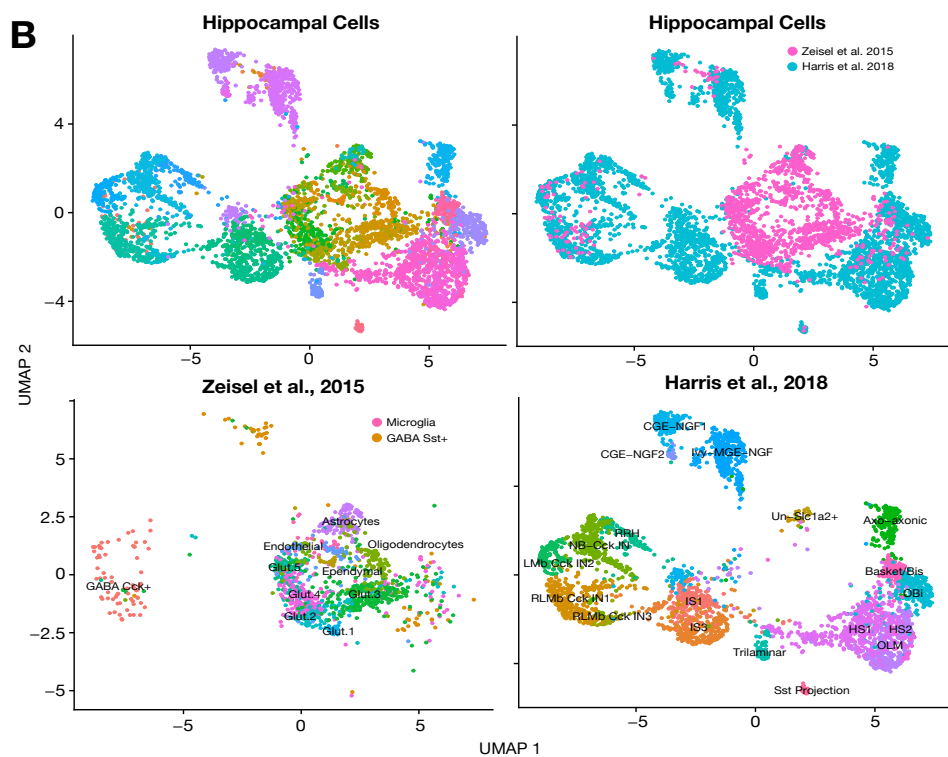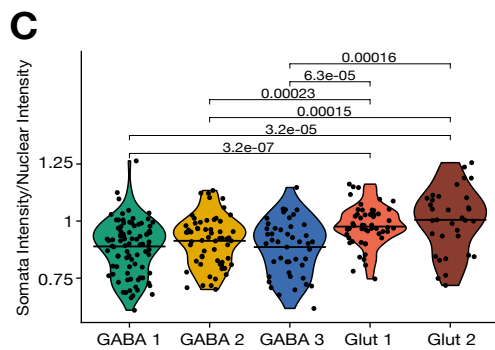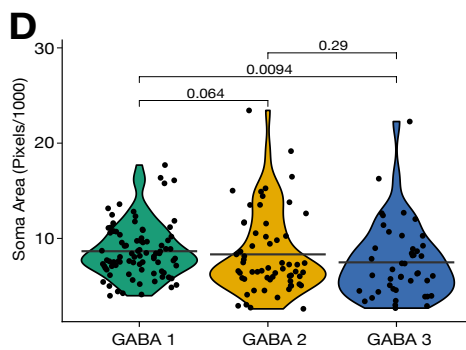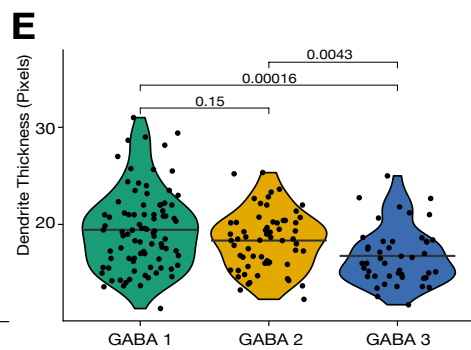

Supplement: supp [file elife-63092-supp-v1.zip]

**A**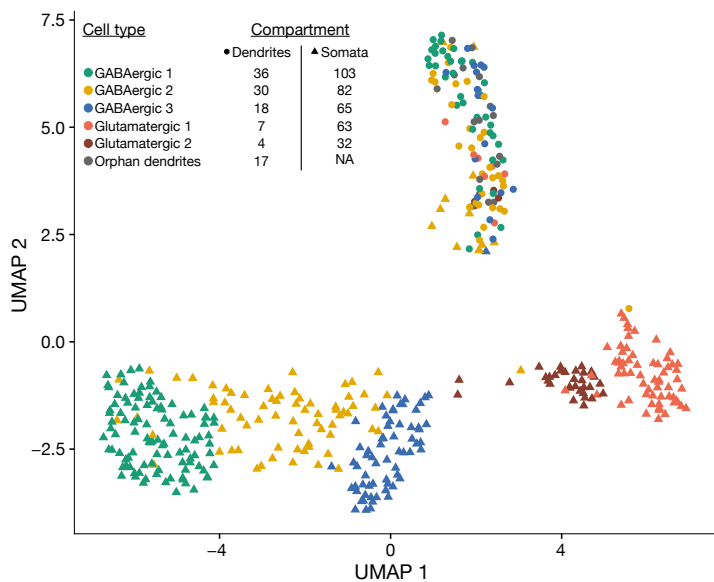**B**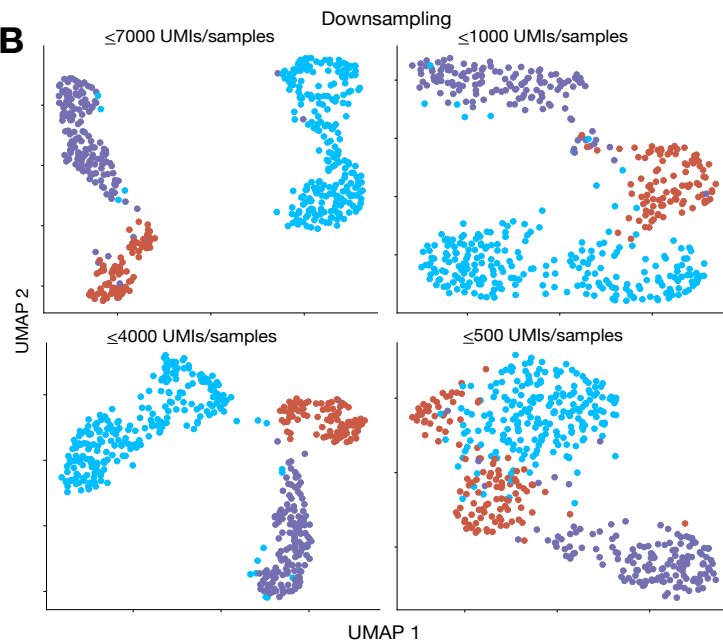**C**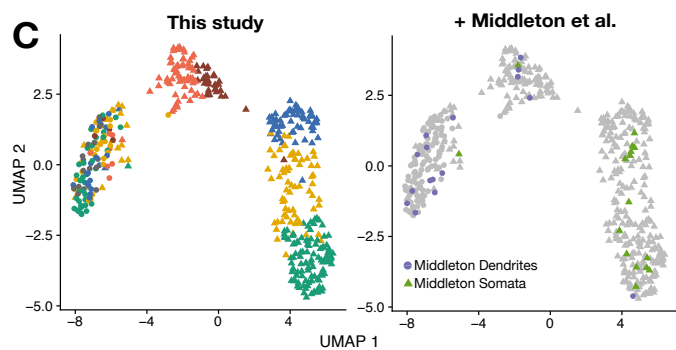**D**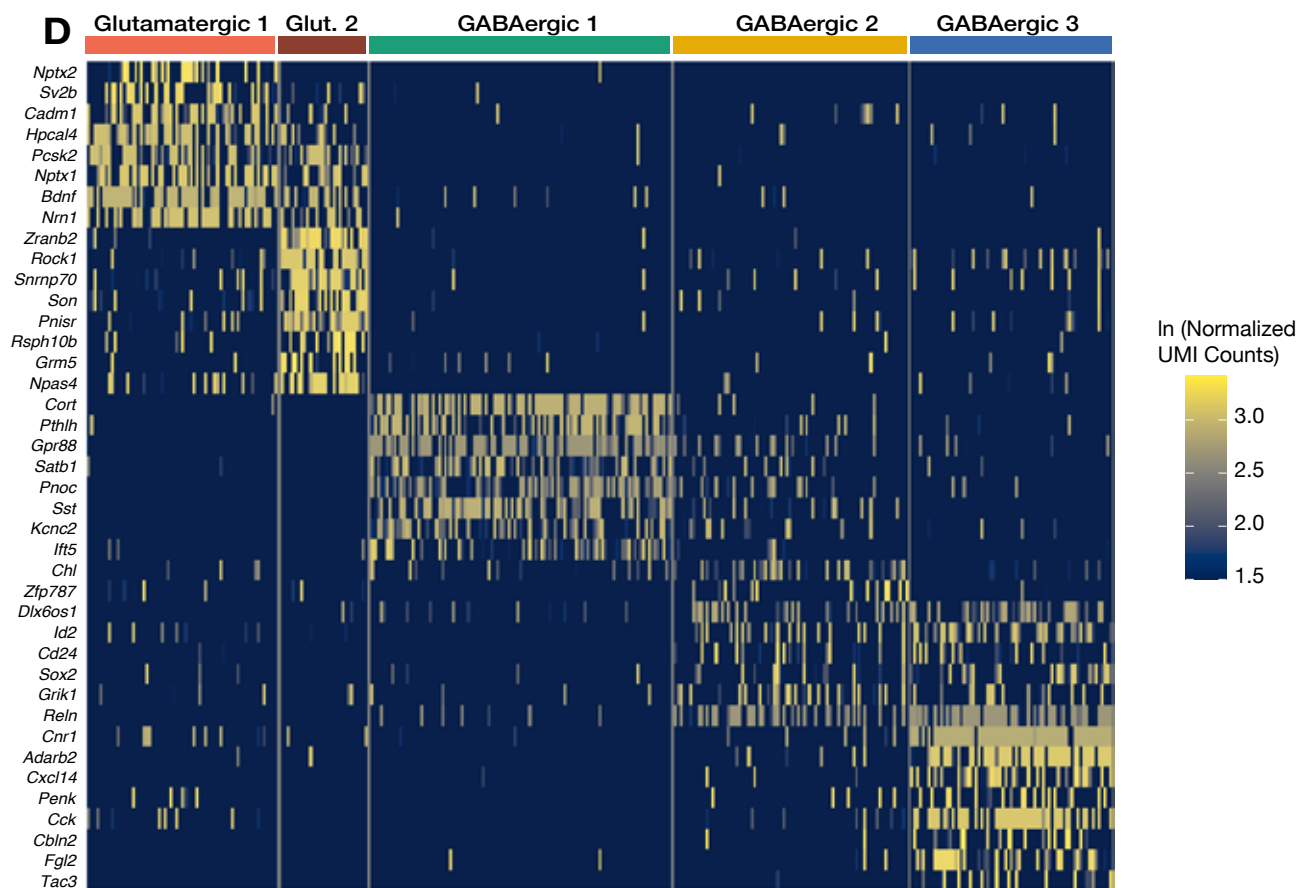

Supplement: supp [file elife-63092-supp-v1.zip]

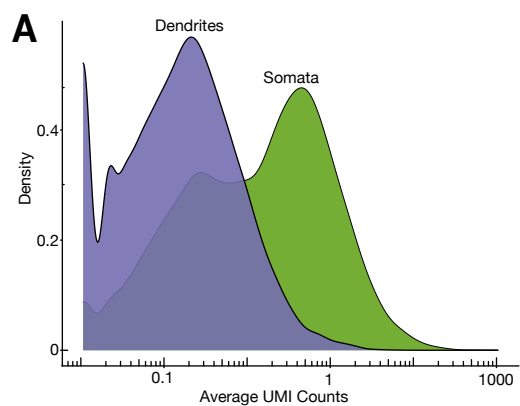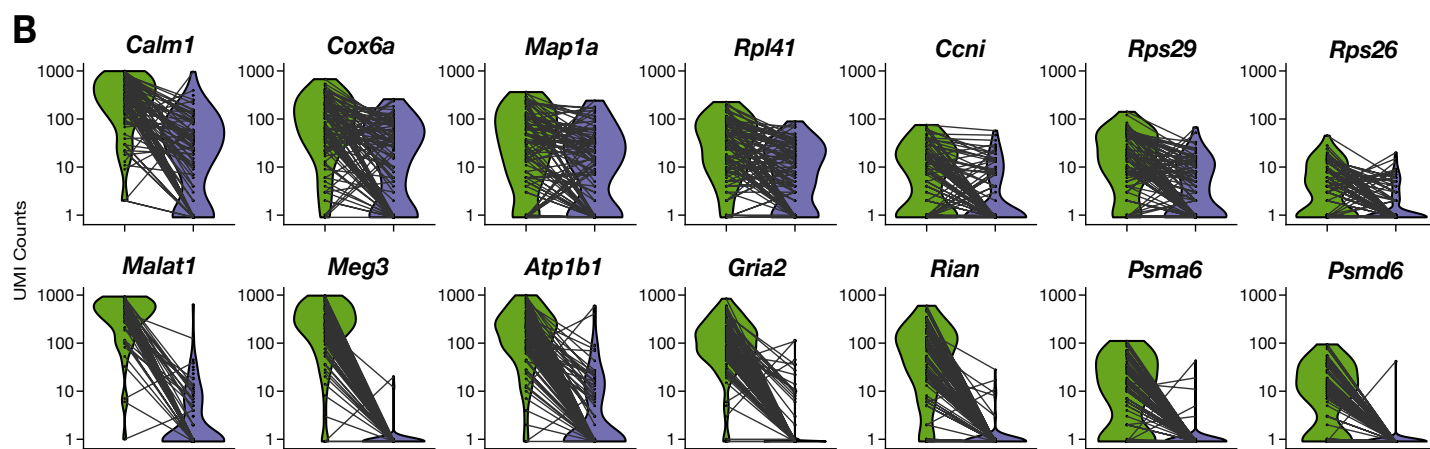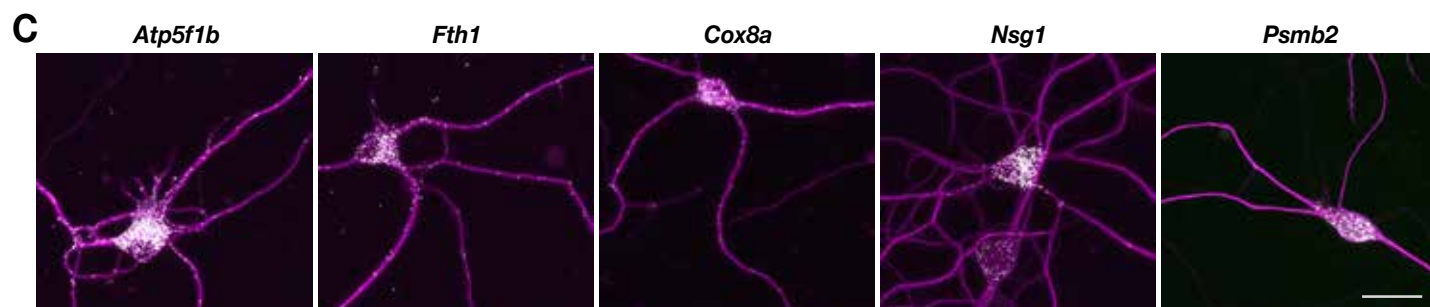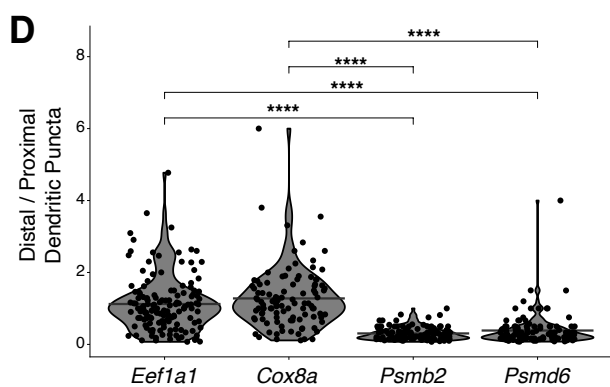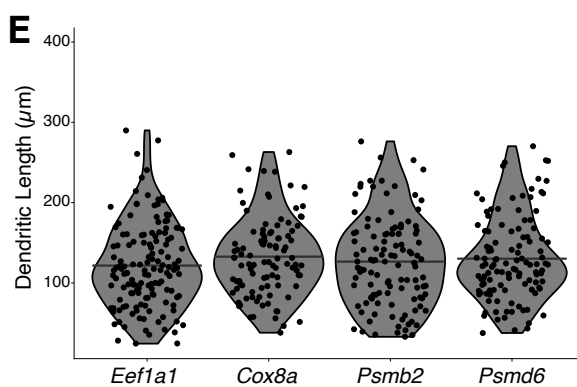

Supplement: supp [file elife-63092-supp-v1.zip]

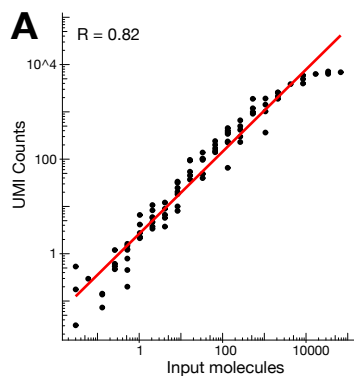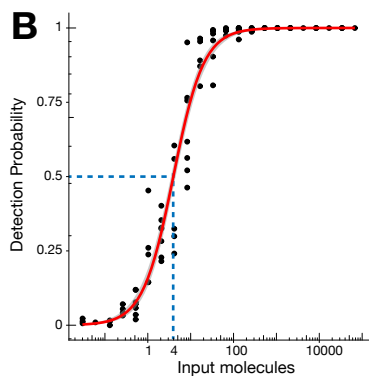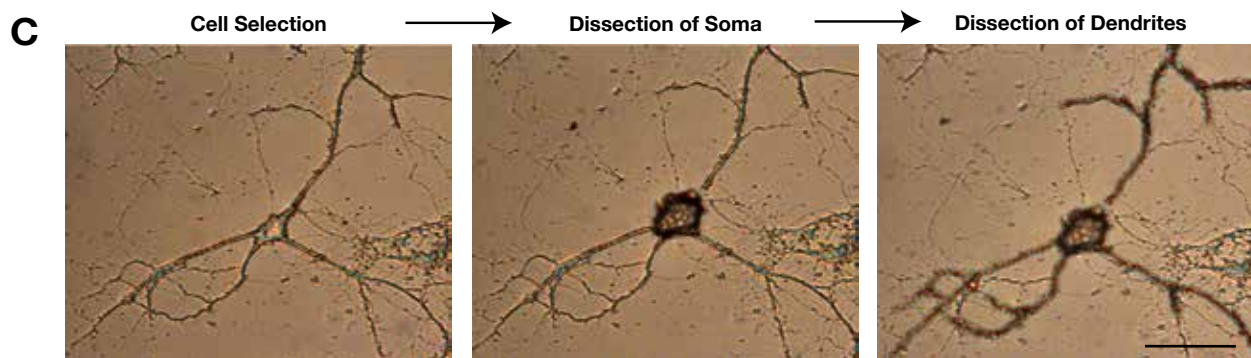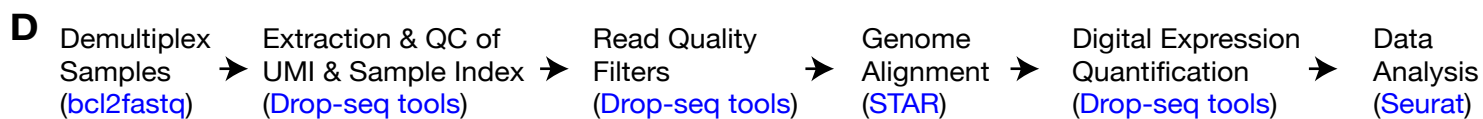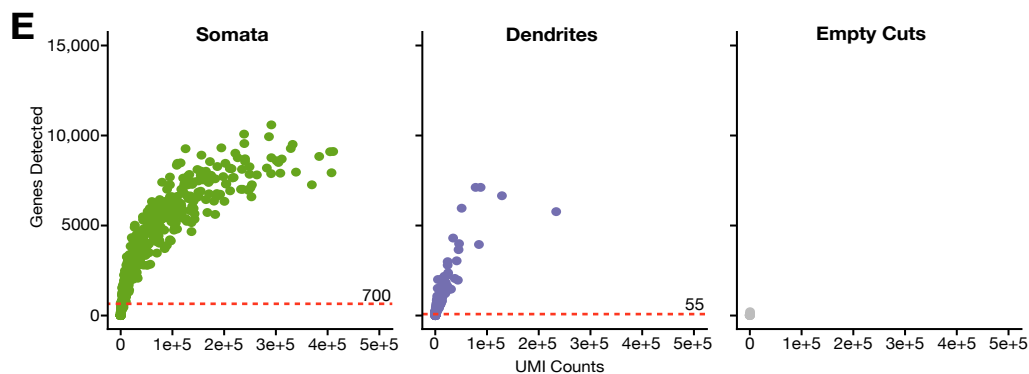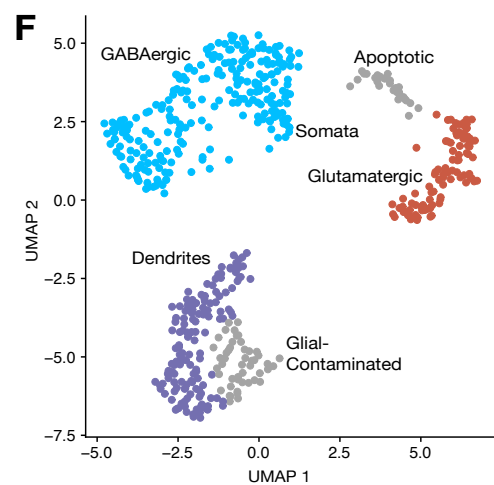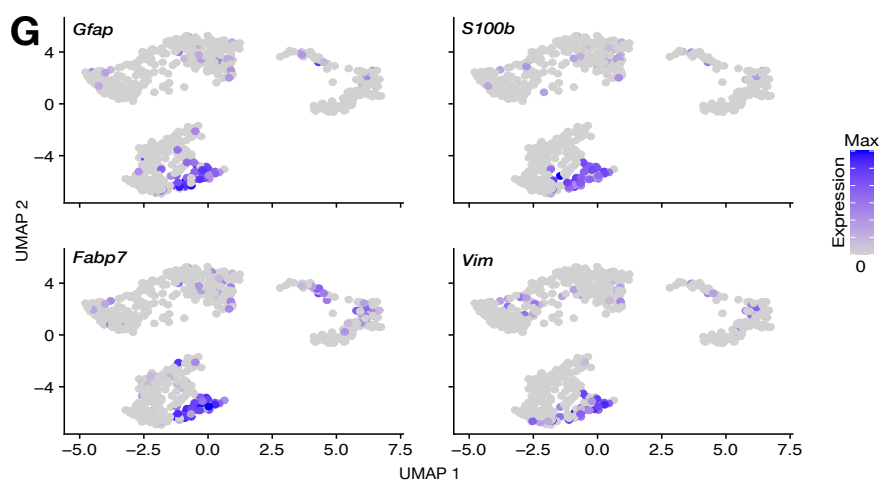

Supplement: supp [file elife-63092-supp-v1.zip]
